# Supplementary material for: Ca2+-dependent H2O2 response in roots and leaves of barley - a transcriptomic investigation
Source: Springer Nature journal article supplement (doi:10.1186/s12870-025-06248-9), 2025-02-20
Supplement: MOESM3 [file 12870_2025_6248_MOESM3_ESM.pdf › 12870_2025_6248_MOESM3_ESM.pdf]

A

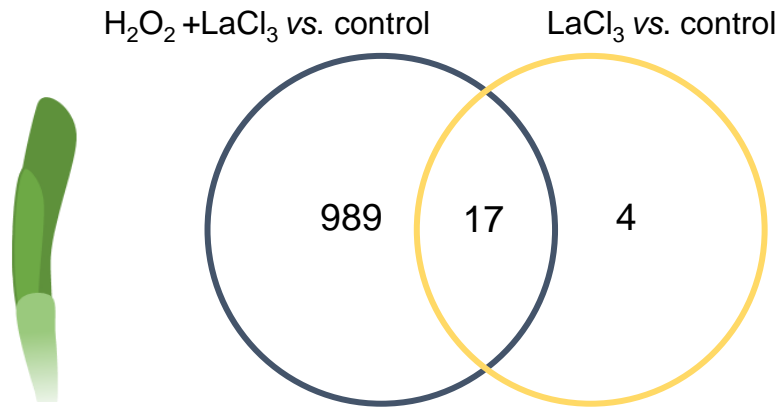

B

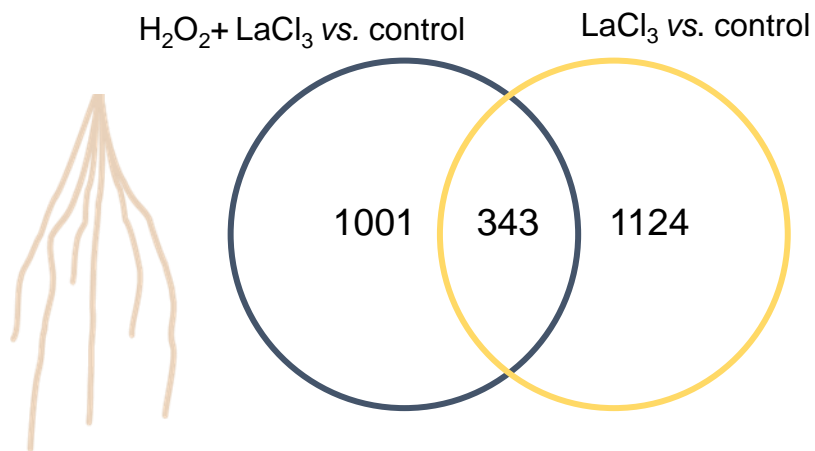

**Fig. S1** Unique and overlapping DEGs between  $H_2O_2 + LaCl_3$  and  $LaCl_3$  treatment alone vs. control treatment. Venn diagram of DEGs (FDR<0.01) from (A) leaves and (B) roots. Only the unique DEGs from the  $H_2O_2 + LaCl_3$  treatment were used for further analyses.

**A**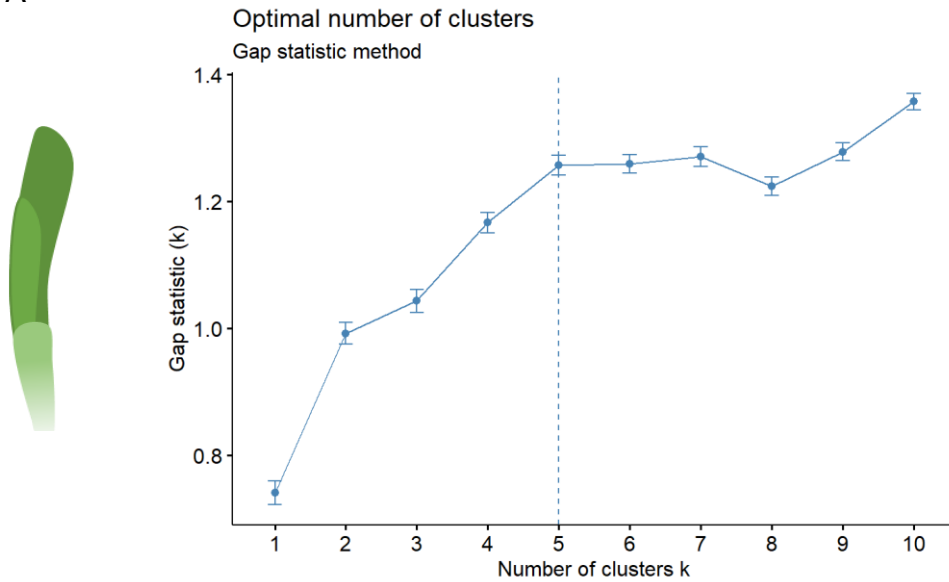**B**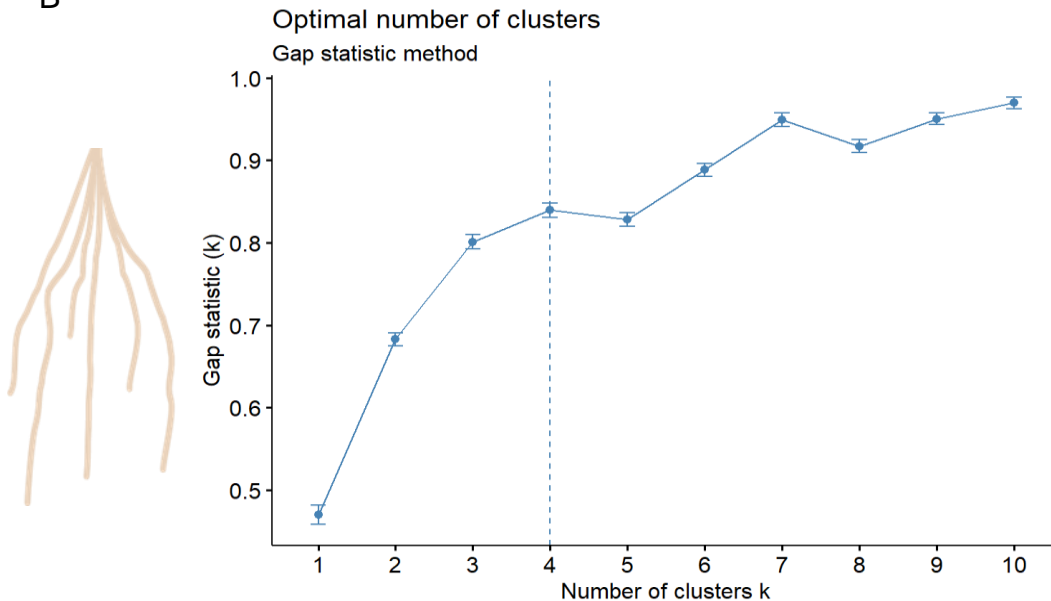

**Fig. S2** Determining the optimal number of clusters for  $\text{Ca}^{2+}$ -dependent  $\text{H}_2\text{O}_2$ -responsive genes in (A) leaves and (B) roots. Gap statistics analysis was used for the calculation, with a total of 100 iterations. `set.seed(123)` function was used before running this function to reduce randomness and inconsistencies in the number of clusters generated. The number of clusters predicted by this analysis was used to perform k-means clustering analyses in figure 5.

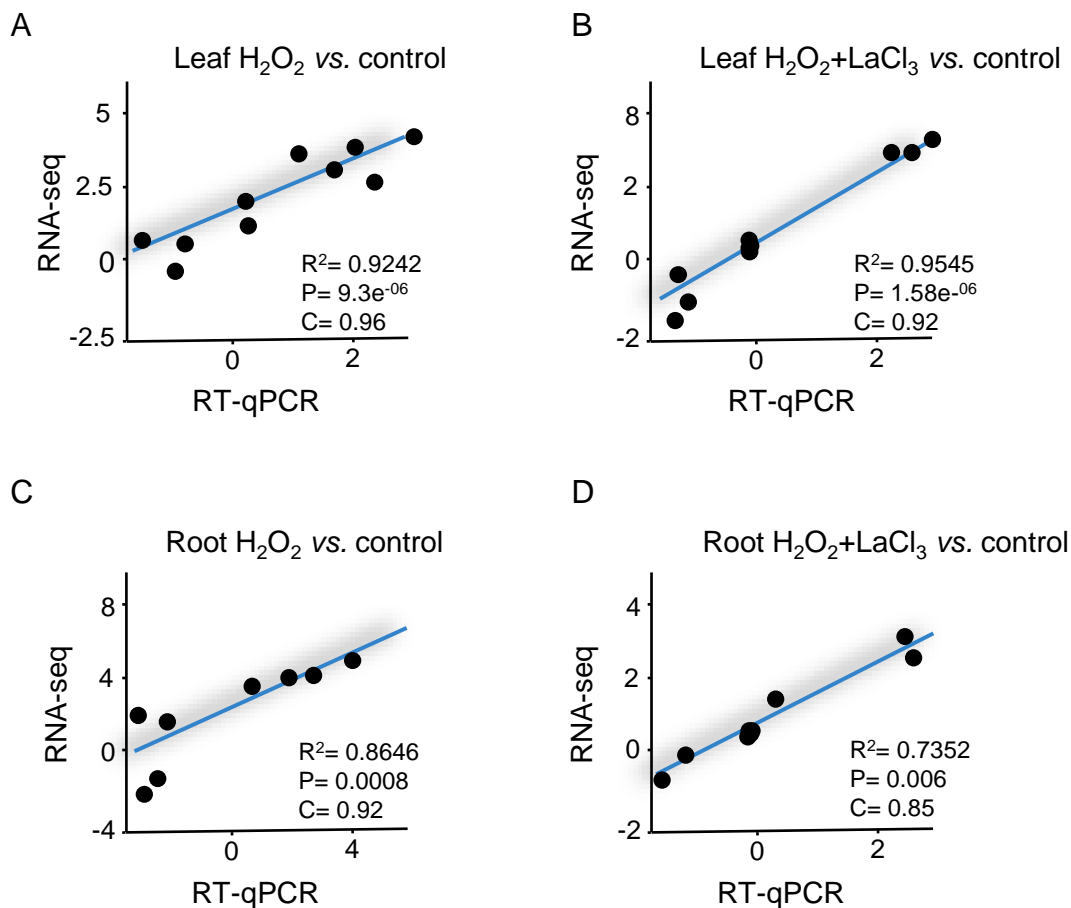

**Fig. S3** Validation of RNA-seq results by RT-qPCR. Linear regression analysis between transcript level ratios derived from RNA-seq and RT-qPCR data under different treatments in leaves (**A and B**) and roots (**C and D**). C: correlation coefficient, P: P-value, R2: R-regression coefficient.

A

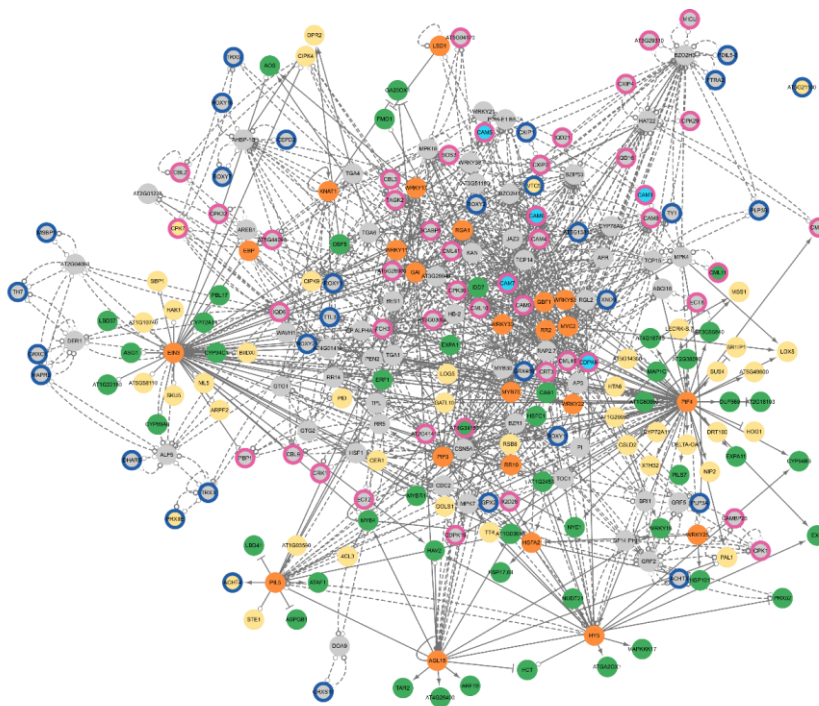

B

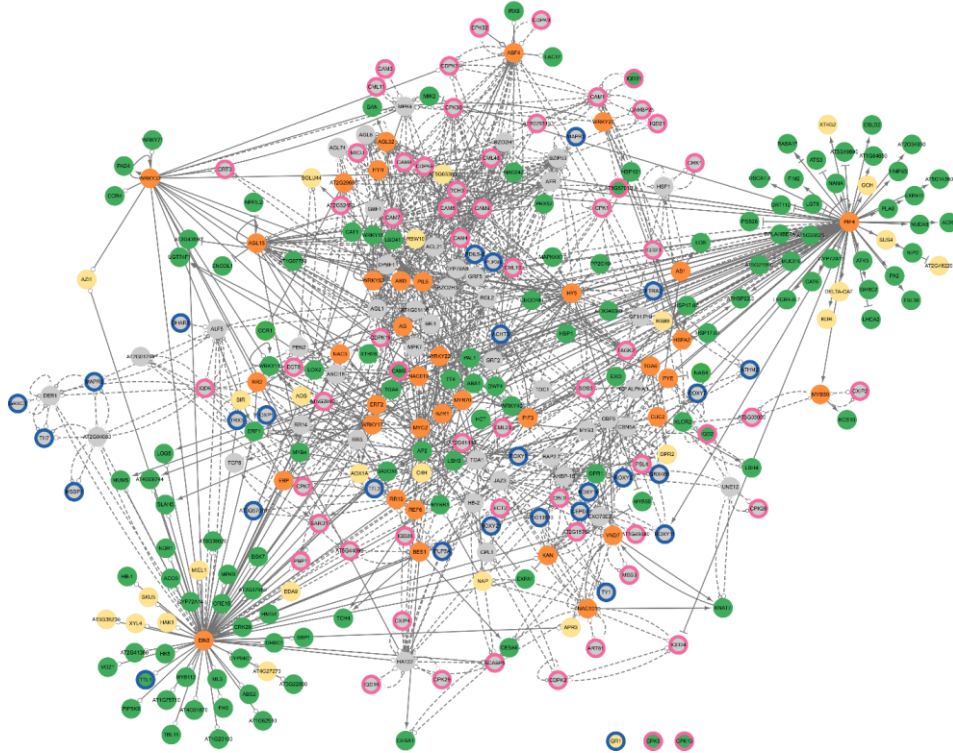

**Fig. S4** CKN analysis of H<sub>2</sub>O<sub>2</sub> signaling based on Arabidopsis orthologs of the genes identified in barley. All paths identified in CKN leading from known Ca<sup>2+</sup>-involved genes (pink-bordered nodes) to Ca<sup>2+</sup>-dependent H<sub>2</sub>O<sub>2</sub> responsive genes (green nodes), and from known redox-related genes (blue-bordered nodes) to Ca<sup>2+</sup>-independent H<sub>2</sub>O<sub>2</sub>-responsive genes (yellow nodes), obtained by RNA-seq, merged into a single network in **(A)** leaves and **(B)** roots. Transcription factors are indicated as orange nodes. Complete networks are provided in additional file 1.

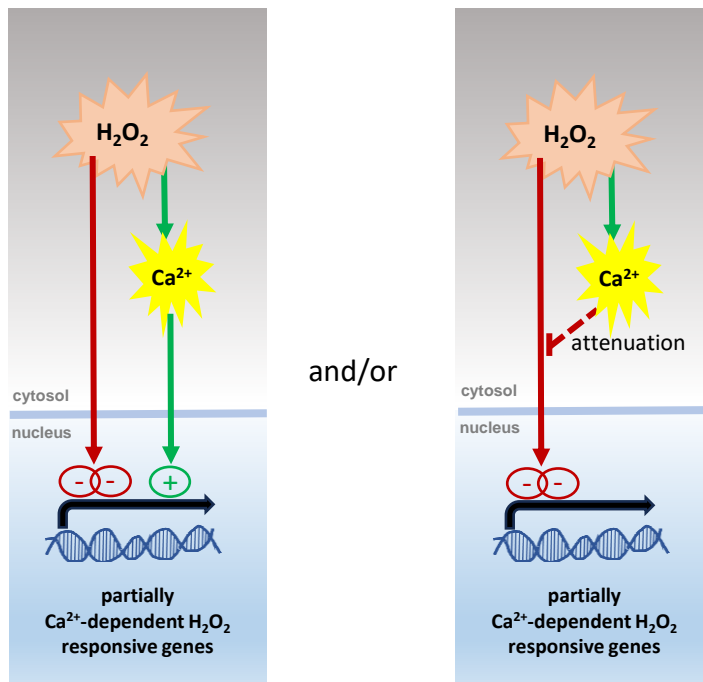

**Fig. S5** Two potential models for an increased reduction in transcript abundance in the absence of the  $H_2O_2$ -induced  $Ca^{2+}$  transient. This could either occur by a regulation of  $Ca^{2+}$ -dependent and -independent pathways, which act in opposite directions with different strength of regulation (left panel). Alternatively, the  $H_2O_2$ -induced  $Ca^{2+}$  signals might attenuate the  $H_2O_2$  response, so that it becomes stronger in its absence. The arrowheads indicate activation (green) or repression (red).
