# Supplementary material for: Ca2+-dependent H2O2 response in roots and leaves of barley - a transcriptomic investigation
Source: BMC Plant Biol. 2025 Feb 20;25:232. doi: 10.1186/s12870-025-06248-9 (PMC11841189; doi:10.1186/s12870-025-06248-9)
Supplement: Supplementary file 1 — Supplementary Material 1: Additional File 1: Raw cytoscape output sessions (.cys) of the SKM network analyses in the roots and leaves of barley. Figures 8, 9 and S5 were prepared from the cytoscape files [file 12870_2025_6248_MOESM1_ESM.xlsx]

## Sheet: Primers
Gene ID	Functional annotation	Tissue and cluster	Forward Primer 5´->3´	Reverse Primer 3´->5´
HORVU3Hr1G056100 (AtCYP72A14)	Uncharacterized protein	Leaf cluster 1	GCACACATTCCACCACCAAAC	TAACACCAAACTGAACATCCAGC
HORVU1Hr1G057410 (AtCML25)	Uncharacterized protein	Leaf cluster 1	CAAATGCCCATCAGCGGTTC	AACTGACAAATCCGGCTGGT
HORVU5Hr1G086670 (AtFMO1)	Flavin mono-oxygenase	Leaf cluster 2	GCTTGGCACATTTGGTGGAC	ATTGCCTAGCCCTTCCCTCA
HORVU5Hr1G124120 (AtGA5)	Fe2OG dioxygenase domain containing protein	Leaf cluster 2	GAGGTCTTCTCCTCGTGGGT	TCGATTTCTCACTCCCTGCAC
HORVU3Hr1G016320 (AtLBD41)	LOB domain containing protein	Leaf cluster 3	TGGGCTAATGGTCAAAGGCG	TCTAAAGCCTCTCTCACCCCC
HORVU2Hr1G078510 (AtLOX3)	Uncharacterized protein	Leaf cluster 3	AGATGTGTATAAGAGACAGCGGC	TCACTCTCTGCGGGCTAGAT
HORVU5Hr1G080300 (no ortholog)	BCBF1	Leaf cluster 4	GCGCCGCTCTGTTTTACATC	GTTCTCTGGCCTCGCTCTTT
HORVU7Hr1G072670 (no ortholog)	NAC domain domain containing protein	Leaf cluster 4	TCGTCTTCTACCAGGGGAGG	AGAACACCCTGCATAGCACC
HORVU6Hr1G035470 (AtMYBR1)	Uncharacterized protein	Leaf cluster 5	GACAGGATAAAGGGGCCGTG	CCCAGCGGTTCGCCC
HORVU6Hr1G028220 (AtRPP13L2)	Uncharacterized protein	Leaf cluster 5	GTCCGCAGGTGTGTACTTCTT	GCGAGTTCCATGTCTCAGCA
HORVU1Hr1G081270 (AtRCI3)	Peroxidase	Root cluster 1	CTTCAGTGACTTCAGCGCGT	ATGCACCATGCAGTTACGCT
HORVU5Hr1G044710 (AtCAM5)	Uncharacterized protein	Root cluster 1	CCCCGTGATTCGTAAGAGGG	ACCTCATGTAGACCATGCCG
HORVU7Hr1G093680 (AtEXPA20)	Expansin	Root cluster 2	CGCCTAAGCGCAAAGCCAAG	GAGGAAGAGCTGTCGGTGGC
HORVU7Hr1G032750 (AtRAP2.2.)	AP2/ERF domain containing protein	Root cluster 2	CGACTTCGAGGGGTTCGTGG	GTCGGATGCCCCTGAACTGG
HORVU3Hr1G056980 (AtMYB21)	Predicted protein	Root cluster 3	CCCTGCTCAGCTTCACGGAG	ACCCCGGCCTGAGGTAGTTT
HORVU4Hr1G028720 (AtXTH5)	Xyloglucan endo transglucosyalase	Root cluster 3	CATGGGCGGAGGACCACATC	TGCATGCTGAAGTGGCCGAA
HORVU1Hr1G001950 (AtOPR1)	Oxidored_FMN domain containing protein	Root cluster 4	CAGGAAGGCCGCTAGGAACG	TGCGGTCGTTGGCACTATCC
HORVU1Hr1G049100 (AtGSTU18)	Uncharacterized protein	Root cluster 4	CAAGGTCCCCGTGCTGATCC	CGTCTTGCTCCATGACGCCT
HORVU1Hr1G002840	HvACTIN	Primer for normalization	GGAAATGGCTGACGGTGAGGAC	GGCGACCAACTATGCTAGGGAAAAC
HORVU6Hr1G054520	Glyceraldehyde-3-phosphate dehydrogenase (HvGAPDHGAPDH)	Primer for normalization	CTGCCTTGCTCCTCTTGCTAA	CCTTCCACCTCTCCAGTCCTT
