# Supplementary material for: Ca2+-dependent H2O2 response in roots and leaves of barley - a transcriptomic investigation
Source: BMC Plant Biol. 2025 Feb 20;25:232. doi: 10.1186/s12870-025-06248-9 (PMC11841189; doi:10.1186/s12870-025-06248-9)
Supplement: Supplementary file 4 — Supplementary Material 4: Additional File 4: Table S2: Differentially expressed genes (DEGs) between either H2O2+LaCl3 or LaCl3 and control samples. Differential expression analysis was carried out with the genes using DESeq2. Attached here are the output files obtained after comparing LaCl3 +H2O2 treated samples with control samples, in the leaf and the root, along with the DESeq2 output files obtained after comparing LaCl3 treated samples. DEGs were identified based on adjusted FDR < 0.01 and are listed separately for leaves and roots. Further genes with FDR> 0.01, were considered as genes with unchanged expression (UCs) compared to control samples. Furthermore, the genes commonly regulated between H2O2+LaCl3 and LaCl3 treatments were excluded to obtain the genes which are unique for H2O2+LaCl3 treatment and presented separately for leaves and roots of barley [file 12870_2025_6248_MOESM4_ESM.xlsx]

## Sheet: Full comparison
Gene ID	Log2FC H2O2 vs. control	Log2FC H2O2+LaCl3 vs. control
HORVU5Hr1G084230	-5.4063176965	-4.4447795009
HORVU5Hr1G014170	-4.2847694149	-3.680470862
HORVU4Hr1G080820	-4.2037039105	-3.5389357548
HORVU6Hr1G027810	-3.773627095	-3.3951902559
HORVU5Hr1G080300	-4.5561333887	-3.3645859603
HORVU2Hr1G121050	-3.9440066532	-3.283349125
HORVU1Hr1G072890	-4.1595437469	-2.9415093361
HORVU2Hr1G046370	-3.7488458265	-2.9352364999
HORVU2Hr1G108520	-3.429286687	-2.9220449154
HORVU5Hr1G086710	-3.6333092485	-2.8987390062
HORVU4Hr1G085250	-2.8697791661	-2.5487697592
HORVU2Hr1G082700	-3.3614655335	-2.5362750311
HORVU7Hr1G072670	-3.9569545583	-2.5351990137
HORVU2Hr1G023450	-3.1221916337	-2.3859158839
HORVU5Hr1G093580	-2.4009800036	-2.3532078864
HORVU4Hr1G085590	-2.5159007371	-2.344010595
HORVU4Hr1G085800	-2.5842732443	-2.3181762782
HORVU1Hr1G092440	-2.8363139401	-2.3149667833
HORVU4Hr1G073840	-2.4368057896	-2.2844634887
HORVU5Hr1G087530	-3.1665476384	-2.2129328453
HORVU7Hr1G109850	-2.4476501213	-2.1244847822
HORVU1Hr1G070190	-2.2861662699	-2.1207135643
HORVU7Hr1G044160	-2.5881303254	-2.1035688498
HORVU4Hr1G008610	-2.0750304841	-2.0689082801
HORVU3Hr1G021150	-2.1976673479	-2.0657070287
HORVU4Hr1G085120	-2.137265536	-2.0504593414
HORVU3Hr1G006450	-2.2022923925	-1.9866271167
HORVU6Hr1G009500	-1.9223768594	-1.9202876478
HORVU6Hr1G028150	-1.9326964018	-1.9037006986
HORVU4Hr1G013170	-2.3592568356	-1.8951590819
HORVU2Hr1G018440	-2.4144690364	-1.8778856302
HORVU2Hr1G007130	-2.2221437554	-1.8688186949
HORVU4Hr1G028720	-2.2052341283	-1.8668117449
HORVU4Hr1G021650	-1.9165622714	-1.866312581
HORVU3Hr1G096910	-2.5498925763	-1.865385009
HORVU3Hr1G010190	-3.3161753518	-1.8531700258
HORVU6Hr1G081400	-2.2195394972	-1.8484625602
HORVU3Hr1G108680	-1.9100300242	-1.8426976629
HORVU4Hr1G072960	-1.9510948512	-1.8354252627
HORVU2Hr1G099470	-1.8735111708	-1.8351267427
HORVU6Hr1G091840	-2.3292331297	-1.8221814248
HORVU4Hr1G006850	-2.1053390458	-1.8098555817
HORVU4Hr1G078950	-2.3828653251	-1.7962011331
HORVU1Hr1G092290	-2.2710526463	-1.7875934276
HORVU1Hr1G021180	-2.085168013	-1.7780418917
HORVU5Hr1G012740	-2.5786849887	-1.7647048786
HORVU5Hr1G115250	-1.8351559044	-1.7560994933
HORVU7Hr1G032360	-2.233174343	-1.7518931182
HORVU4Hr1G009070	-1.8352446877	-1.7177773308
HORVU3Hr1G059130	-1.8545445378	-1.7073202003
HORVU7Hr1G116310	-2.2920183549	-1.7053732908
HORVU6Hr1G089980	-2.0338666324	-1.702902295
HORVU4Hr1G013180	-1.8609947512	-1.6985985207
HORVU3Hr1G097810	-2.2265997733	-1.6954572009
HORVU5Hr1G119520	-2.4941463669	-1.6933409037
HORVU2Hr1G091270	-2.0759040912	-1.6916882912
HORVU7Hr1G017790	-2.324142298	-1.6898449782
HORVU6Hr1G008640	-1.7694381238	-1.673899411
HORVU5Hr1G110090	-3.7279256178	-1.6702892749
HORVU5Hr1G067200	-2.0692437483	-1.647709611
HORVU2Hr1G121060	-1.6980282534	-1.640725302
HORVU3Hr1G108330	-1.6867061276	-1.6260499951
HORVU2Hr1G034270	-1.7406705976	-1.6213762949
HORVU6Hr1G088580	-2.1558361871	-1.6209724987
HORVU2Hr1G032710	-1.6444860564	-1.6140487594
HORVU5Hr1G069510	-1.6875314117	-1.6137856102
HORVU5Hr1G084900	-1.9355274973	-1.5895115655
HORVU2Hr1G123730	-1.7643119753	-1.5828037688
HORVU6Hr1G081160	-1.6502784456	-1.5749924456
HORVU5Hr1G013990	-1.7918808568	-1.574018469
HORVU2Hr1G018570	-2.0043040627	-1.5669268182
HORVU1Hr1G063780	-3.1787139842	-1.5564843765
HORVU5Hr1G006360	-1.6196850999	-1.5556110498
HORVU5Hr1G073800	-2.4013724219	-1.5533149253
HORVU2Hr1G104150	-2.1462689916	-1.5525616041
HORVU4Hr1G055220	-2.2973915615	-1.5514475102
HORVU7Hr1G073370	-1.7130973895	-1.5489190711
HORVU0Hr1G012860	-1.822146886	-1.5469829442
HORVU2Hr1G122580	-1.8591913183	-1.546826605
HORVU5Hr1G123540	-1.6879498721	-1.5452809562
HORVU4Hr1G082600	-1.7402792451	-1.5406483709
HORVU2Hr1G073210	-1.6279612747	-1.5208499717
HORVU7Hr1G054710	-1.9356060104	-1.5183632088
HORVU3Hr1G007280	-1.2734311259	-1.5174590815
HORVU1Hr1G080040	-2.2885444952	-1.5119700995
HORVU5Hr1G059410	-1.9208239704	-1.4931142713
HORVU7Hr1G091350	-2.1868504805	-1.4905458196
HORVU1Hr1G071180	-2.1082161574	-1.4899859438
HORVU3Hr1G068410	-2.6144281529	-1.4706777975
HORVU0Hr1G017570	-1.8047587618	-1.4687303432
HORVU4Hr1G018230	-1.6677296689	-1.4503622131
HORVU3Hr1G000350	-1.7209916883	-1.4390953237
HORVU1Hr1G056210	-1.7944760401	-1.4315688449
HORVU3Hr1G064680	-1.5786494055	-1.4305121113
HORVU3Hr1G093350	-1.5936350596	-1.4277690646
HORVU3Hr1G067130	-1.738833353	-1.4234132533
HORVU2Hr1G093210	-1.8541879997	-1.4085799173
HORVU4Hr1G018230	-1.6677296689	-1.4503622131
HORVU3Hr1G000350	-1.7209916883	-1.4390953237
HORVU1Hr1G056210	-1.7944760401	-1.4315688449
HORVU3Hr1G064680	-1.5786494055	-1.4305121113
HORVU3Hr1G093350	-1.5936350596	-1.4277690646
HORVU3Hr1G067130	-1.738833353	-1.4234132533
HORVU2Hr1G093210	-1.8541879997	-1.4085799173
HORVU4Hr1G015040	-1.553016377	-1.401271095
HORVU7Hr1G051150	-1.6022980352	-1.3962269387
HORVU2Hr1G120200	-1.9678133647	-1.3955924353
HORVU4Hr1G087840	-1.8587829899	-1.3862396849
HORVU4Hr1G020710	-1.7929054579	-1.3839677224
HORVU7Hr1G091180	-1.7017003117	-1.3824159951
HORVU6Hr1G037000	-1.5654992742	-1.3637680574
HORVU5Hr1G060070	-1.4655810173	-1.3617499772
HORVU7Hr1G055900	-1.5906174219	-1.3607967451
HORVU5Hr1G104050	-1.5086839992	-1.360278974
HORVU7Hr1G081250	-1.476438364	-1.3579209621
HORVU1Hr1G066090	-1.4067016797	-1.3568042704
HORVU3Hr1G014590	-1.751891423	-1.3513454436
HORVU6Hr1G073520	-1.6510848843	-1.3466835369
HORVU5Hr1G102900	-1.9242967137	-1.338777001
HORVU4Hr1G084840	-1.5028895748	-1.3371417814
HORVU1Hr1G071460	-1.5671261737	-1.3349834715
HORVU5Hr1G049160	-1.5704074132	-1.3265343819
HORVU3Hr1G092020	-1.4762374404	-1.3265313542
HORVU7Hr1G087250	-1.6217653016	-1.3104126187
HORVU1Hr1G094180	-1.7389538906	-1.3083824027
HORVU3Hr1G000120	-1.4369648344	-1.3026408143
HORVU7Hr1G050140	-2.010500665	-1.3007585319
HORVU1Hr1G023220	-1.3857922046	-1.2927327207
HORVU5Hr1G124380	-1.4134354171	-1.2829857706
HORVU6Hr1G012640	-1.6515532313	-1.2734256752
HORVU2Hr1G065100	-1.49428226	-1.2718771431
HORVU4Hr1G080810	-1.362662177	-1.2644423304
HORVU4Hr1G001450	-1.3930366305	-1.2596877944
HORVU1Hr1G074510	-1.5356710784	-1.2528752405
HORVU3Hr1G069880	-1.4356173086	-1.2299865698
HORVU5Hr1G063810	-1.9616265802	-1.2291592597
HORVU6Hr1G039940	-1.4345626671	-1.2243780696
HORVU3Hr1G003860	-1.2314320446	-1.22026418
HORVU2Hr1G022540	-2.4781860275	-1.2200972906
HORVU3Hr1G091230	-1.4875262631	-1.2179101026
HORVU5Hr1G080540	-1.3738819901	-1.2070260168
HORVU5Hr1G018480	-1.8271697685	-1.2060586998
HORVU3Hr1G115540	-1.6954794058	-1.2046178264
HORVU4Hr1G060000	-1.2695794024	-1.1926829801
HORVU3Hr1G117840	-1.4114576073	-1.1924698768
HORVU5Hr1G086520	-1.5837960186	-1.1916932789
HORVU7Hr1G029720	-1.3622847252	-1.1903517609
HORVU4Hr1G076690	-1.5146201247	-1.1886198854
HORVU7Hr1G122470	-1.6369468643	-1.1821237613
HORVU2Hr1G028540	-1.277221109	-1.1803033442
HORVU5Hr1G012240	-1.658049329	-1.1762647704
HORVU4Hr1G000310	-1.5781218113	-1.173576944
HORVU3Hr1G074940	-1.3000340204	-1.1708603331
HORVU3Hr1G108170	-1.4499241007	-1.1677292014
HORVU5Hr1G119810	-2.030810055	-1.1654170271
HORVU7Hr1G117640	-1.3808130787	-1.1566013664
EPlHVUG00000039816	-1.4285793271	-1.1438195119
EPlHVUG00000039840	-1.3346213716	-1.1390715778
HORVU2Hr1G099550	-1.3786772763	-1.137540839
HORVU2Hr1G013420	-1.2369879817	-1.1340282566
HORVU3Hr1G030150	-1.3992310278	-1.1220061894
HORVU4Hr1G014900	-1.5131825156	-1.1110317336
HORVU5Hr1G040970	-1.3347396933	-1.1067866428
HORVU5Hr1G028550	-1.5710840096	-1.0985572294
HORVU5Hr1G011980	-1.5842035935	-1.0971321107
HORVU5Hr1G045020	-1.2493786129	-1.0939142066
HORVU3Hr1G052980	-1.1122233268	-1.0926130656
HORVU6Hr1G078110	-1.4377259854	-1.0882860396
HORVU1Hr1G023510	-1.1656511514	-1.0849883116
HORVU7Hr1G045330	-1.2242221098	-1.0830660126
HORVU7Hr1G085790	-1.6481821362	-1.0814596704
HORVU4Hr1G089030	-1.4920206457	-1.0725251927
HORVU2Hr1G094090	-1.27246232	-1.0692722633
HORVU1Hr1G028200	-1.3017537229	-1.0654473805
HORVU5Hr1G116920	-1.1727735951	-1.0596136592
HORVU6Hr1G060150	-1.1258401499	-1.0515052134
HORVU4Hr1G088910	-1.1866555755	-1.0462217322
HORVU7Hr1G085450	-1.453148007	-1.0439409941
HORVU2Hr1G125950	-1.3813200714	-1.0391013481
HORVU4Hr1G077310	-1.3107334377	-1.037705983
HORVU5Hr1G011730	-2.4449656138	-1.037481638
HORVU7Hr1G118010	-1.4433457878	-1.0315820941
HORVU5Hr1G075430	-1.6138183364	-1.0273025221
HORVU7Hr1G044210	-1.1974677988	-1.0191663938
HORVU3Hr1G048520	-1.1323901944	-1.0154795637
HORVU1Hr1G005260	-1.2565423532	-1.0113755909
HORVU7Hr1G100810	-1.1156879517	-1.0058371149
HORVU5Hr1G058270	-1.1535300505	-1.0036492079
HORVU5Hr1G023800	-1.1912908978	-1.0002378631
HORVU1Hr1G017460	-1.4262262599	-0.99849940597
HORVU5Hr1G072520	-1.2523215089	-0.99406759899
HORVU5Hr1G002090	-1.2494308536	-0.99034716628
HORVU5Hr1G082990	-1.3349274306	-0.98997094965
HORVU7Hr1G000370	-1.6646388681	-0.98979075432
HORVU3Hr1G006140	-1.2578623179	-0.98568358536
HORVU1Hr1G017970	-1.0739375971	-0.98252633224
HORVU4Hr1G090820	-1.4706194705	-0.98096901195
HORVU2Hr1G004230	-1.5590842394	-0.98041719945
HORVU3Hr1G018820	-1.041519247	-0.97258249845
HORVU1Hr1G056280	-1.5659232946	-0.97117877944
HORVU6Hr1G012400	-1.132941163	-0.96573557224
HORVU3Hr1G105300	-2.1572394175	-0.96292454891
HORVU1Hr1G061090	-1.094796433	-0.96006085981
HORVU3Hr1G095400	-1.2168916203	-0.95653908691
HORVU5Hr1G081090	-1.0825367753	-0.94773052529
HORVU5Hr1G110180	-1.356276205	-0.93782625503
HORVU3Hr1G068970	-1.1561288677	-0.93439287851
HORVU2Hr1G095720	-1.0444790414	-0.93179756155
HORVU6Hr1G072810	-1.015059668	-0.92840272829
HORVU2Hr1G022600	-1.5273410139	-0.92826605597
HORVU3Hr1G009980	-1.2092946743	-0.92362252257
HORVU7Hr1G041300	1.4393748566	-0.91810188042
HORVU2Hr1G092820	-1.212881049	-0.91460387933
HORVU7Hr1G052500	1.2763296649	-0.89471977553
HORVU5Hr1G099200	-1.1212122054	-0.89086480196
HORVU6Hr1G089750	-1.0167973963	-0.88639446018
HORVU2Hr1G113460	-1.2967665312	-0.88635457183
HORVU4Hr1G000850	-1.1447807045	-0.88449982262
HORVU2Hr1G099450	-1.0694734752	-0.88134938401
HORVU5Hr1G006900	-1.0764979173	-0.87367697972
HORVU3Hr1G005500	-1.1935236936	-0.87338211728
HORVU3Hr1G074960	-1.1362462292	-0.87316073883
HORVU2Hr1G080140	-1.0327065811	-0.87247603268
HORVU4Hr1G050230	-1.0581666805	-0.85591093745
HORVU7Hr1G078500	-1.0654572925	-0.84950934283
HORVU2Hr1G124960	-1.632421411	-0.83686812904
HORVU4Hr1G019530	-1.2821577902	-0.83450947942
HORVU1Hr1G073170	-1.0677958541	-0.82160326895
HORVU6Hr1G058740	-1.2025792638	-0.81576663018
HORVU3Hr1G014960	-1.0245065984	-0.81375581579
HORVU6Hr1G091700	-1.1353292587	-0.80222798314
HORVU5Hr1G005290	-1.396004607	-0.79817111603
HORVU7Hr1G088560	-1.0284473385	-0.78371188946
HORVU6Hr1G035370	1.6573492703	0.6955950518
HORVU5Hr1G100910	1.0096742089	0.72462399042
HORVU4Hr1G075410	1.0312669957	0.76365923727
HORVU3Hr1G072860	1.1071658224	0.77706384413
HORVU0Hr1G008850	1.3379591056	0.77755838906
HORVU7Hr1G098540	1.7530136546	0.79272853088
HORVU4Hr1G083820	1.1387436967	0.79489960465
HORVU5Hr1G111590	1.1888687997	0.79678561246
HORVU5Hr1G056530	1.0592241849	0.80304400597
HORVU7Hr1G038160	1.8517772422	0.81085164106
HORVU5Hr1G062290	2.3464332205	0.81445608403
HORVU2Hr1G102620	1.074270976	0.82536590411
HORVU5Hr1G100790	1.0898450304	0.82867809555
HORVU1Hr1G078350	1.1353038312	0.84432905308
HORVU5Hr1G006780	1.00981935	0.86416528436
HORVU5Hr1G070800	1.2912524994	0.86623891567
HORVU7Hr1G009370	1.0284765532	0.86728123428
HORVU5Hr1G080060	1.6513623084	0.87088506641
HORVU3Hr1G017630	1.037828257	0.87335303087
HORVU4Hr1G084810	1.3745287879	0.87520025611
HORVU2Hr1G045900	1.5706069419	0.89187524665
HORVU0Hr1G012230	1.0673035196	0.89335177651
HORVU6Hr1G019520	1.1027352949	0.89719095815
HORVU2Hr1G092190	1.5423880668	0.90310904895
HORVU2Hr1G063840	1.2153130865	0.91411316756
HORVU7Hr1G044070	1.0801583167	0.91678554354
HORVU7Hr1G117890	1.4023636996	0.91705696716
HORVU6Hr1G073630	1.3500534984	0.91822855384
HORVU2Hr1G080100	1.1495928834	0.9356970382
HORVU5Hr1G097940	1.3406107613	0.9360621384
HORVU3Hr1G061080	2.4692387292	0.93970442127
HORVU2Hr1G109370	1.0045895291	0.94232242227
HORVU1Hr1G045220	1.2998132857	0.945239442
HORVU1Hr1G020450	1.1771587334	0.95418741081
HORVU3Hr1G071830	1.2903943434	0.95525205676
HORVU5Hr1G008730	1.1173938283	0.97539895552
HORVU5Hr1G088920	1.0152854141	0.9840753358
HORVU2Hr1G100960	1.2467362853	0.9916511928
HORVU3Hr1G086220	1.4295464234	0.99767387358
HORVU5Hr1G115280	1.2570308976	1.0070571335
HORVU3Hr1G022020	1.0026952588	1.0096317801
HORVU2Hr1G039070	1.8409947339	1.0169090593
HORVU4Hr1G072620	1.39647558	1.0180969654
HORVU5Hr1G071140	1.1371996607	1.0225692755
HORVU1Hr1G068910	1.6678350681	1.02395624
HORVU7Hr1G030690	1.316970481	1.0261576449
HORVU2Hr1G010830	1.6127528766	1.0307415079
HORVU2Hr1G085690	1.0976597128	1.0358869682
HORVU4Hr1G059860	1.3752571229	1.0438274612
HORVU3Hr1G082210	1.3513690069	1.0451776219
HORVU5Hr1G096940	1.5610702986	1.0642684349
HORVU2Hr1G093960	1.6417644243	1.0643529511
HORVU1Hr1G064210	1.1553321216	1.068497095
HORVU7Hr1G093080	2.706160671	1.0725797725
HORVU5Hr1G067530	1.3578431479	1.074691006
HORVU4Hr1G079310	1.2235900833	1.0793343942
HORVU5Hr1G103770	1.87562473	1.0803469949
HORVU2Hr1G039710	1.0866302687	1.0907036406
HORVU7Hr1G040030	2.2151010852	1.0916510223
HORVU6Hr1G075420	1.2182782074	1.0937528443
HORVU7Hr1G038510	1.8524548153	1.0983149041
HORVU1Hr1G038680	1.2153747102	1.1002552523
HORVU3Hr1G071800	1.3207322799	1.1027509589
HORVU2Hr1G061850	2.4957976365	1.103154283
HORVU2Hr1G085880	1.1765348655	1.1161172564
HORVU6Hr1G034620	1.2669176379	1.1186509255
HORVU3Hr1G081400	1.7774187761	1.1187764927
HORVU2Hr1G095320	1.8166244098	1.121686681
HORVU0Hr1G022580	1.4015181259	1.122906463
HORVU0Hr1G040490	1.4608212148	1.1242882276
HORVU2Hr1G105100	1.031966708	1.1245594914
HORVU3Hr1G075150	1.3326071406	1.1270563501
HORVU5Hr1G084700	2.0273636931	1.1379610962
HORVU5Hr1G066760	1.2042734882	1.1476075844
HORVU6Hr1G072640	1.303185607	1.1558748621
HORVU5Hr1G002320	1.5116138672	1.1585338119
HORVU2Hr1G091910	1.1199806948	1.1687291353
HORVU3Hr1G115610	1.1736290115	1.169757242
HORVU6Hr1G021160	1.3877448783	1.1728249475
HORVU1Hr1G055140	1.8239194846	1.1789087055
HORVU2Hr1G110120	1.2794663958	1.1798611851
HORVU4Hr1G053130	1.4446862442	1.1813022298
HORVU6Hr1G033450	1.1953538049	1.1880653135
HORVU3Hr1G072730	1.1419023462	1.1880823972
HORVU3Hr1G089290	1.2401450187	1.2000430334
HORVU6Hr1G036760	1.5378784972	1.2010213288
HORVU5Hr1G112280	1.1376928166	1.2033338937
HORVU3Hr1G011560	1.4029331685	1.2034922928
HORVU2Hr1G041110	1.3885152	1.2063266278
HORVU4Hr1G000910	1.5501085791	1.2090233506
HORVU4Hr1G067940	1.7888614131	1.2166162728
HORVU1Hr1G083960	1.5067553477	1.2169530085
HORVU3Hr1G001360	1.911155863	1.2177059493
HORVU2Hr1G011610	1.5453769271	1.2188333169
HORVU7Hr1G012300	1.5995749118	1.221506576
HORVU5Hr1G065370	1.3384507611	1.2360696242
HORVU3Hr1G065620	2.553924826	1.2361045373
HORVU5Hr1G113240	2.0756188417	1.237372697
HORVU7Hr1G101920	1.4563142168	1.2425647374
HORVU6Hr1G025830	2.3604484857	1.2484362965
HORVU7Hr1G010240	1.4805157804	1.2518825622
HORVU3Hr1G083500	1.7028746112	1.2684832576
HORVU4Hr1G059390	2.0525405415	1.2703219159
HORVU2Hr1G108420	1.330899565	1.2743949051
HORVU2Hr1G041080	1.5717444807	1.280332672
HORVU2Hr1G105800	1.9619295405	1.2844480652
HORVU6Hr1G080750	1.5192457569	1.2851560029
HORVU2Hr1G022780	1.5498474834	1.287523359
HORVU7Hr1G101580	2.0520849064	1.2883926535
HORVU7Hr1G001040	1.4541474421	1.2928742124
HORVU4Hr1G072340	2.1869440422	1.3056716055
HORVU4Hr1G051400	1.285366386	1.3057187543
HORVU6Hr1G009850	1.3797415897	1.3061397292
HORVU1Hr1G053440	2.0174868951	1.3133364171
HORVU3Hr1G021190	1.9190231181	1.3133551331
HORVU7Hr1G030660	1.6582123663	1.315374701
HORVU2Hr1G098160	1.3887575927	1.3184346391
HORVU3Hr1G067860	1.7724888497	1.3199925182
HORVU2Hr1G027400	1.4843090496	1.3253627948
HORVU7Hr1G117550	1.7091340902	1.334797364
HORVU1Hr1G065030	1.6794397793	1.3390522122
HORVU6Hr1G029750	2.3329797695	1.3397488707
HORVU2Hr1G088030	2.0186462581	1.3417392953
HORVU5Hr1G068110	2.0772313386	1.3469171169
HORVU7Hr1G099380	1.4718844165	1.355763382
HORVU7Hr1G115370	1.3914774208	1.3572281893
HORVU5Hr1G080820	3.1667462704	1.3629117817
HORVU7Hr1G046050	1.4289235894	1.3687609337
HORVU7Hr1G050530	2.1140344548	1.3759985038
HORVU3Hr1G019580	1.8646559287	1.3917895203
HORVU2Hr1G113260	1.5680548446	1.3986661509
HORVU1Hr1G079730	2.0058291241	1.4047727521
HORVU4Hr1G077360	1.783064198	1.4100382834
HORVU1Hr1G063450	1.9632445151	1.4129027036
HORVU7Hr1G035500	1.5888863644	1.413429281
HORVU3Hr1G058100	1.8868711224	1.4140172829
HORVU5Hr1G047000	1.5837241971	1.42285872
HORVU3Hr1G083740	3.0733504116	1.4360475935
HORVU6Hr1G063020	1.8027499149	1.4391646366
HORVU2Hr1G118050	1.5767943604	1.4483801294
HORVU6Hr1G077710	2.5419729784	1.4505126166
HORVU4Hr1G010540	1.7034177593	1.4601317298
HORVU1Hr1G087070	2.2155230299	1.4701883351
HORVU2Hr1G027370	1.7909801234	1.4735885207
HORVU0Hr1G020420	1.5420115778	1.4751255722
HORVU1Hr1G084690	1.5084228117	1.4778838331
HORVU5Hr1G096090	1.7988717114	1.4794269943
HORVU1Hr1G004230	2.0798985697	1.4808156169
HORVU3Hr1G071120	2.6168955572	1.4883608707
HORVU4Hr1G027970	1.9022882606	1.4901506729
HORVU7Hr1G049370	1.827767569	1.4951357762
HORVU4Hr1G090440	1.5222009887	1.5006586508
HORVU0Hr1G040430	1.632071196	1.5197992158
HORVU5Hr1G053700	2.6559570812	1.5347020265
HORVU1Hr1G055420	1.9105484841	1.542966476
HORVU7Hr1G057330	1.5837680774	1.5495975533
HORVU3Hr1G038050	1.6081707639	1.5585029305
HORVU1Hr1G047430	2.0390434129	1.5586233956
HORVU3Hr1G087670	1.7870755785	1.5604997733
HORVU1Hr1G073940	2.0886263456	1.5817215459
HORVU2Hr1G078510	2.7123945767	1.5823426622
HORVU6Hr1G086790	1.714027225	1.5828119393
HORVU1Hr1G094490	1.7340221288	1.5886086969
HORVU1Hr1G077560	2.0874619898	1.5914005491
HORVU4Hr1G072310	1.9683834495	1.6224184607
HORVU0Hr1G002720	1.6546128764	1.6226915888
HORVU4Hr1G065920	1.8873858076	1.6321422879
HORVU2Hr1G115960	1.740999645	1.6394040192
HORVU3Hr1G020490	3.0731918182	1.6648287139
HORVU7Hr1G000260	1.7984294013	1.6745074159
HORVU2Hr1G032780	2.3555269944	1.6767647896
HORVU2Hr1G081890	2.056736922	1.6789666728
HORVU3Hr1G030360	1.8557461859	1.6861248785
HORVU3Hr1G013630	1.9970582317	1.6979744078
HORVU4Hr1G013210	2.261856516	1.7238784775
HORVU5Hr1G097930	2.9940493852	1.726613976
HORVU4Hr1G060720	2.467864727	1.7271067157
HORVU4Hr1G071040	1.9968058672	1.7359049714
HORVU2Hr1G005170	2.6344241308	1.7466162878
HORVU2Hr1G084640	1.6950939744	1.7466185806
HORVU4Hr1G002360	2.0452651261	1.7641034453
HORVU7Hr1G018600	2.5812853033	1.7699940489
HORVU3Hr1G087480	2.0349374775	1.770373764
HORVU2Hr1G017080	2.0981520703	1.7753466665
HORVU4Hr1G063640	2.0230912662	1.7944394647
HORVU7Hr1G093050	3.6354424205	1.8160253505
HORVU1Hr1G083340	2.083220337	1.8924163309
HORVU0Hr1G002870	2.2602824726	1.8997385117
HORVU2Hr1G106040	2.4888425163	1.9004885911
HORVU2Hr1G067750	2.5530547081	1.9147296442
HORVU2Hr1G083490	2.0394507805	1.9251420424
HORVU4Hr1G087980	2.4624659753	1.9547537018
HORVU4Hr1G090660	2.0899967202	1.9703938345
HORVU2Hr1G066080	2.2608202553	1.992400539
HORVU7Hr1G114950	2.3628727539	2.0007504194
HORVU3Hr1G016320	3.3529524546	2.0559007326
HORVU2Hr1G108790	2.2717962752	2.1210830649
HORVU5Hr1G098360	2.5924649281	2.1329653474
HORVU7Hr1G085130	2.3469374953	2.1689234299
HORVU4Hr1G083170	2.2612553953	2.1799782982
HORVU5Hr1G074010	2.7236367661	2.2103695017
HORVU4Hr1G089490	2.7292946826	2.2732423163
HORVU4Hr1G005810	2.3475516874	2.2832258527
HORVU6Hr1G082360	2.9870090745	2.3776852069
HORVU7Hr1G084940	1.8182610187	2.4222393045
HORVU2Hr1G031400	2.6838116776	2.4434609161
HORVU5Hr1G067490	2.8442263239	2.4552101805
HORVU7Hr1G010300	2.908587755	2.5006218916
HORVU6Hr1G003300	3.0337888884	3.2884724717
HORVU2Hr1G116830	5.4564712787	3.4630286258
HORVU2Hr1G032100	4.3138582014	3.4666112525
HORVU5Hr1G065420	4.4623363401	4.061530774
HORVU5Hr1G108670	1.383871352	-0.9995988278
HORVU6Hr1G028220	1.386824808	-1.0811442642
HORVU0Hr1G002410	1.523944079	-1.3211493183
HORVU7Hr1G041260	2.0400707629	-0.82692903941
HORVU2Hr1G094780	2.7271402716	-1.4564584786
HORVU2Hr1G002320	1.4392745932	-1.6325941324
HORVU7Hr1G052500	1.2763296649	-0.89471977553
HORVU3Hr1G022260	-1.2302349793	-2.3274072086
HORVU3Hr1G020100	-1.2637799276	-1.2703723973
HORVU5Hr1G093040	-1.4106286912	-1.4249037835
HORVU7Hr1G038860	-1.055914639	-1.7656307933
HORVU4Hr1G057000	-1.5644919801	-1.7012056314
HORVU1Hr1G049420	-1.5843377471	-1.847773504
HORVU5Hr1G104580	-1.3204311427	-1.9573762836
HORVU4Hr1G077300	-2.6622918384	-2.9319715421
HORVU3Hr1G068830	-2.142783918	-2.5448943311
HORVU5Hr1G011540	-2.9791439252	-3.0141637914
HORVU5Hr1G119480	-2.5296941763	-2.9667679909
HORVU2Hr1G077180	-1.7508269623	-2.9638673302
HORVU5Hr1G052230	-1.0220454206	-1.0560142873
HORVU4Hr1G016730	-1.0788832284	-1.1638313277
HORVU3Hr1G008420	-1.0195885146	-1.0205072623
HORVU2Hr1G121310	-1.0757997373	-1.1310022039
HORVU6Hr1G070510	-1.1239581078	-1.1232574537
HORVU7Hr1G091740	-1.0899324582	-1.1231726023
HORVU7Hr1G033230	-1.2543685035	-1.3155401264
HORVU7Hr1G003090	-1.2119682093	-1.305482325
HORVU2Hr1G091280	-1.2298806253	-1.2974557508
HORVU6Hr1G018770	-1.2369042106	-1.2942093836
HORVU1Hr1G068950	-1.2120573224	-1.2636499971
HORVU5Hr1G106520	-1.2449948686	-1.2487682239
HORVU4Hr1G073480	-1.101041987	-1.2427372595
HORVU2Hr1G115890	-1.059170589	-1.4060993211
HORVU1Hr1G029520	-1.3673690937	-1.3964069042
HORVU2Hr1G013940	-1.042865064	-1.3904351545
HORVU5Hr1G124450	-1.3496593617	-1.3891988821
HORVU6Hr1G073730	-1.1391126604	-1.3590765422
HORVU5Hr1G092960	-1.2504604172	-1.5198597144
HORVU7Hr1G087490	-1.4583482201	-1.4589570443
HORVU1Hr1G007480	-1.2654751658	-1.4587702012
HORVU2Hr1G078960	-1.6129453124	-1.6900272535
HORVU0Hr1G022690	-1.3107495378	-1.6640428621
HORVU2Hr1G080460	-1.4798827154	-1.657067416
HORVU2Hr1G026820	-1.4280774322	-1.5898471105
HORVU1Hr1G040720	-1.5588571581	-1.5715607554
HORVU5Hr1G092960	-1.2504604172	-1.5198597144
HORVU6Hr1G029910	-1.6552023796	-1.7317830333
HORVU4Hr1G021000	-1.525904037	-1.7276309278
HORVU6Hr1G035470	-1.0486071738	-2.0829473273
HORVU3Hr1G022260	-1.2302349793	-2.3274072086
HORVU2Hr1G077180	-1.7508269623	-2.9638673302
HORVU5Hr1G064650	1.1216046074	1.2236927918
HORVU7Hr1G109140	1.0370284189	1.2413329286
HORVU1Hr1G079280	1.1835431313	1.2525981783
HORVU1Hr1G054260	1.1532812868	1.2669969541
HORVU7Hr1G008390	1.1320332847	1.2849702503
HORVU3Hr1G027220	1.1721947917	1.2959713824
HORVU4Hr1G067450	1.2241876873	1.3763123519
HORVU2Hr1G037470	1.3158288344	1.3842151682
HORVU7Hr1G096560	1.1529004049	1.4497166597
HORVU2Hr1G116800	1.2701802348	1.4631263037
HORVU4Hr1G047240	1.1330210615	1.4658023827
HORVU2Hr1G087010	1.3026983558	1.4723690577
HORVU4Hr1G063190	1.4551226179	1.4946236246
HORVU4Hr1G066740	1.5999927451	1.6029889207
HORVU7Hr1G121210	1.4669732353	1.6117486706
HORVU7Hr1G008430	1.5082178923	1.6167784581
HORVU1Hr1G052290	1.5333759779	1.64975221
HORVU3Hr1G024400	1.6214279712	1.6510296332
HORVU4Hr1G017030	1.440863276	1.6582988071
HORVU6Hr1G004000	1.128525668	1.7277323157
HORVU7Hr1G035320	1.7598715056	1.7716841407
HORVU7Hr1G029260	1.4348492136	1.8047204989
HORVU7Hr1G051730	1.6937737319	1.8068889205
HORVU2Hr1G005220	1.3339996973	1.815479911
HORVU2Hr1G042370	1.0726992226	1.8226023773
HORVU7Hr1G050030	1.5863675948	1.9195179391
HORVU2Hr1G105010	1.658555702	1.9654192841
HORVU6Hr1G074660	1.65586957	1.9839682715
HORVU5Hr1G103990	1.537435455	2.0065666669
HORVU7Hr1G088670	1.6687056871	2.070235113
HORVU1Hr1G082310	3.38994	UC
HORVU3Hr1G056100	3.20787	UC
HORVU6Hr1G078510	3.00916	UC
HORVU5Hr1G093140	2.99649	UC
HORVU5Hr1G080450	2.98285	UC
HORVU4Hr1G062830	2.82383	UC
HORVU5Hr1G072700	2.74441	UC
HORVU5Hr1G068450	2.68163	UC
HORVU0Hr1G016780	2.4877	UC
HORVU3Hr1G072810	2.47138	UC
HORVU1Hr1G082470	2.46466	UC
HORVU1Hr1G044080	2.45861	UC
HORVU6Hr1G054430	2.39344	UC
HORVU4Hr1G009800	2.37098	UC
HORVU1Hr1G076730	2.31841	UC
HORVU1Hr1G069620	2.30121	UC
HORVU1Hr1G063390	2.28774	UC
HORVU7Hr1G036500	2.28618	UC
HORVU1Hr1G057410	2.24717	UC
HORVU4Hr1G025180	2.20137	UC
HORVU6Hr1G090200	2.19955	UC
HORVU5Hr1G081820	2.19642	UC
HORVU1Hr1G056820	2.19569	UC
HORVU2Hr1G092710	2.18853	UC
HORVU1Hr1G078860	2.14499	UC
HORVU2Hr1G004640	2.13509	UC
HORVU7Hr1G092710	2.11971	UC
HORVU7Hr1G041230	2.05991	UC
HORVU2Hr1G110180	2.05743	UC
HORVU4Hr1G071100	2.03643	UC
HORVU2Hr1G100870	2.00059	UC
HORVU3Hr1G065610	1.98926	UC
HORVU7Hr1G030730	1.98543	UC
HORVU2Hr1G094230	1.97125	UC
HORVU1Hr1G044040	1.96384	UC
HORVU2Hr1G010800	1.93687	UC
HORVU3Hr1G087320	1.90736	UC
HORVU6Hr1G016480	1.89954	UC
HORVU4Hr1G076820	1.89916	UC
HORVU5Hr1G069730	1.87641	UC
HORVU6Hr1G090280	1.85119	UC
HORVU2Hr1G022960	1.84631	UC
HORVU3Hr1G020520	1.84211	UC
HORVU4Hr1G076850	1.80238	UC
HORVU5Hr1G059900	1.8015	UC
HORVU2Hr1G100480	1.78824	UC
HORVU2Hr1G046290	1.78571	UC
HORVU2Hr1G048520	1.7758	UC
HORVU4Hr1G090090	1.75782	UC
HORVU7Hr1G114700	1.73245	UC
HORVU5Hr1G080900	1.69778	UC
HORVU7Hr1G034350	1.68655	UC
HORVU2Hr1G083090	1.68166	UC
HORVU5Hr1G093960	1.67791	UC
HORVU4Hr1G056470	1.67419	UC
HORVU5Hr1G093860	1.66609	UC
HORVU6Hr1G077780	1.6585	UC
HORVU1Hr1G008940	1.64794	UC
HORVU3Hr1G000150	1.6417	UC
HORVU6Hr1G001060	1.64005	UC
HORVU5Hr1G097560	1.62174	UC
HORVU6Hr1G077770	1.61025	UC
ENSRNA049489212	1.60692	UC
HORVU2Hr1G040830	1.59631	UC
HORVU4Hr1G024500	1.59337	UC
HORVU2Hr1G027080	1.58838	UC
HORVU2Hr1G123270	1.58824	UC
HORVU2Hr1G083430	1.58783	UC
HORVU3Hr1G087310	1.58536	UC
HORVU6Hr1G088140	1.57834	UC
HORVU3Hr1G055450	1.57212	UC
HORVU3Hr1G036380	1.56434	UC
HORVU5Hr1G112930	1.55859	UC
HORVU2Hr1G035160	1.55134	UC
HORVU3Hr1G108630	1.53038	UC
HORVU1Hr1G080680	1.52823	UC
HORVU7Hr1G120120	1.51642	UC
HORVU7Hr1G089240	1.51198	UC
HORVU2Hr1G027760	1.50178	UC
HORVU7Hr1G026290	1.49217	UC
HORVU5Hr1G087880	1.48486	UC
HORVU7Hr1G116400	1.47381	UC
HORVU4Hr1G054770	1.47067	UC
HORVU6Hr1G086440	1.46979	UC
HORVU3Hr1G116080	1.46427	UC
HORVU1Hr1G074670	1.46196	UC
HORVU5Hr1G097060	1.45701	UC
HORVU7Hr1G109590	1.45458	UC
HORVU7Hr1G043590	1.45358	UC
HORVU3Hr1G007570	1.4489	UC
HORVU6Hr1G091180	1.44615	UC
HORVU3Hr1G105360	1.44362	UC
HORVU4Hr1G017430	1.44194	UC
HORVU5Hr1G081500	1.43501	UC
HORVU5Hr1G118060	1.4257	UC
HORVU1Hr1G080160	1.42145	UC
HORVU4Hr1G031530	1.41535	UC
HORVU3Hr1G068760	1.41483	UC
HORVU7Hr1G027010	1.41191	UC
HORVU5Hr1G068060	1.39836	UC
HORVU7Hr1G008700	1.39639	UC
HORVU7Hr1G117370	1.3804	UC
HORVU2Hr1G036280	1.36766	UC
HORVU5Hr1G048000	1.36608	UC
HORVU2Hr1G109010	1.36532	UC
HORVU1Hr1G017120	1.36349	UC
HORVU3Hr1G065640	1.36315	UC
HORVU4Hr1G059120	1.35978	UC
HORVU6Hr1G089340	1.35633	UC
HORVU2Hr1G027470	1.35117	UC
HORVU3Hr1G003920	1.35113	UC
HORVU0Hr1G040410	1.34815	UC
HORVU7Hr1G052460	1.34212	UC
HORVU5Hr1G097310	1.33823	UC
HORVU7Hr1G036570	1.33298	UC
HORVU6Hr1G077610	1.33106	UC
HORVU4Hr1G060260	1.3178	UC
HORVU3Hr1G070300	1.3158	UC
HORVU5Hr1G092510	1.30962	UC
HORVU7Hr1G095920	1.30335	UC
HORVU6Hr1G028790	1.30019	UC
HORVU6Hr1G089560	1.29989	UC
HORVU3Hr1G083680	1.29373	UC
HORVU5Hr1G058300	1.28416	UC
HORVU1Hr1G052010	1.27145	UC
HORVU2Hr1G029350	1.26907	UC
HORVU3Hr1G020390	1.26759	UC
HORVU1Hr1G081320	1.26665	UC
HORVU3Hr1G085180	1.26122	UC
HORVU5Hr1G075920	1.26088	UC
HORVU1Hr1G084260	1.25416	UC
HORVU2Hr1G074130	1.2467	UC
HORVU5Hr1G096370	1.24123	UC
HORVU3Hr1G031560	1.24061	UC
HORVU6Hr1G070290	1.24004	UC
HORVU5Hr1G034180	1.23918	UC
HORVU1Hr1G029180	1.23792	UC
HORVU7Hr1G113830	1.22861	UC
HORVU5Hr1G045700	1.22838	UC
HORVU7Hr1G033820	1.22522	UC
HORVU1Hr1G017240	1.22512	UC
HORVU7Hr1G118020	1.22509	UC
HORVU5Hr1G098090	1.21091	UC
HORVU7Hr1G041570	1.20639	UC
HORVU6Hr1G028690	1.19765	UC
HORVU1Hr1G083300	1.19198	UC
HORVU1Hr1G082900	1.19034	UC
HORVU0Hr1G021850	1.1809	UC
HORVU3Hr1G030650	1.17972	UC
HORVU2Hr1G113270	1.17439	UC
HORVU1Hr1G089440	1.16027	UC
HORVU5Hr1G014060	1.1571	UC
HORVU2Hr1G099890	1.15627	UC
HORVU2Hr1G103890	1.1562	UC
HORVU5Hr1G072920	1.14985	UC
HORVU7Hr1G038900	1.14932	UC
HORVU7Hr1G119910	1.14279	UC
HORVU0Hr1G038040	1.14272	UC
HORVU3Hr1G096210	1.14237	UC
HORVU5Hr1G069700	1.14174	UC
HORVU2Hr1G019520	1.14044	UC
HORVU0Hr1G013740	1.14036	UC
HORVU3Hr1G070340	1.13919	UC
HORVU1Hr1G075670	1.13423	UC
HORVU3Hr1G017410	1.13301	UC
HORVU4Hr1G002650	1.12958	UC
HORVU1Hr1G090100	1.1294	UC
HORVU3Hr1G084640	1.1256	UC
HORVU1Hr1G043710	1.12351	UC
HORVU5Hr1G107290	1.11503	UC
HORVU6Hr1G068770	1.10624	UC
HORVU5Hr1G023730	1.10277	UC
HORVU1Hr1G047030	1.10122	UC
HORVU4Hr1G057200	1.09452	UC
HORVU3Hr1G076480	1.09018	UC
HORVU7Hr1G086250	1.08776	UC
HORVU3Hr1G037050	1.08683	UC
HORVU2Hr1G084270	1.0852	UC
HORVU6Hr1G018330	1.06744	UC
HORVU7Hr1G052750	1.06088	UC
HORVU1Hr1G041890	1.06008	UC
HORVU4Hr1G074270	1.05327	UC
HORVU0Hr1G015530	1.05228	UC
HORVU2Hr1G094020	1.04425	UC
HORVU2Hr1G002500	1.04045	UC
HORVU5Hr1G098490	1.03985	UC
HORVU5Hr1G115100	1.03621	UC
HORVU2Hr1G088480	1.03495	UC
HORVU3Hr1G084830	1.02683	UC
HORVU2Hr1G100100	1.02576	UC
HORVU5Hr1G046850	1.023	UC
HORVU7Hr1G041500	1.02116	UC
HORVU4Hr1G081210	1.01539	UC
HORVU6Hr1G022680	1.01474	UC
HORVU2Hr1G038760	1.01029	UC
HORVU1Hr1G086070	1.00585	UC
HORVU3Hr1G010620	-1.00048	UC
HORVU6Hr1G009360	-1.00497	UC
HORVU7Hr1G034120	-1.01749	UC
HORVU0Hr1G000780	-1.02297	UC
HORVU3Hr1G089990	-1.04025	UC
HORVU1Hr1G009920	-1.04043	UC
HORVU7Hr1G091100	-1.05617	UC
HORVU3Hr1G094870	-1.06972	UC
HORVU6Hr1G021460	-1.07044	UC
HORVU1Hr1G049100	-1.07224	UC
HORVU5Hr1G109250	-1.07607	UC
HORVU1Hr1G054040	-1.07979	UC
HORVU2Hr1G013400	-1.08951	UC
HORVU1Hr1G050470	-1.09228	UC
HORVU3Hr1G113640	-1.09933	UC
HORVU1Hr1G054020	-1.1061	UC
HORVU6Hr1G073740	-1.12209	UC
HORVU5Hr1G059070	-1.13146	UC
HORVU3Hr1G019360	-1.13378	UC
HORVU4Hr1G090720	-1.14143	UC
HORVU7Hr1G007540	-1.14409	UC
HORVU5Hr1G123550	-1.15515	UC
HORVU3Hr1G081180	-1.16863	UC
HORVU3Hr1G017160	-1.1795	UC
HORVU7Hr1G090830	-1.19017	UC
HORVU2Hr1G049420	-1.21552	UC
HORVU4Hr1G022830	-1.21593	UC
HORVU2Hr1G045970	-1.2171	UC
HORVU2Hr1G073410	-1.22465	UC
HORVU3Hr1G070540	-1.22855	UC
HORVU3Hr1G016490	-1.23811	UC
HORVU5Hr1G083910	-1.26566	UC
HORVU3Hr1G080500	-1.28189	UC
HORVU4Hr1G028050	-1.28518	UC
HORVU6Hr1G016420	-1.30181	UC
HORVU5Hr1G111180	-1.30211	UC
HORVU2Hr1G044450	-1.34984	UC
HORVU7Hr1G018780	-1.35495	UC
HORVU4Hr1G050020	-1.35801	UC
HORVU3Hr1G109160	-1.35898	UC
HORVU7Hr1G109750	-1.36057	UC
HORVU6Hr1G005360	-1.38294	UC
HORVU5Hr1G062450	-1.38846	UC
HORVU1Hr1G061710	-1.39516	UC
HORVU5Hr1G110220	-1.3967	UC
HORVU7Hr1G118560	-1.39682	UC
HORVU4Hr1G010050	-1.40513	UC
HORVU5Hr1G069610	-1.42952	UC
HORVU3Hr1G049810	-1.44452	UC
HORVU3Hr1G105400	-1.44807	UC
HORVU1Hr1G003810	-1.45323	UC
HORVU6Hr1G041770	-1.45382	UC
HORVU3Hr1G022780	-1.46941	UC
HORVU7Hr1G028460	-1.47403	UC
HORVU2Hr1G065000	-1.48134	UC
HORVU2Hr1G081300	-1.48361	UC
HORVU6Hr1G065900	-1.50719	UC
HORVU2Hr1G114980	-1.51415	UC
HORVU3Hr1G062690	-1.51618	UC
HORVU3Hr1G003980	-1.52494	UC
HORVU3Hr1G081230	-1.52512	UC
HORVU2Hr1G028660	-1.55444	UC
HORVU6Hr1G059940	-1.55621	UC
HORVU5Hr1G010880	-1.56282	UC
HORVU2Hr1G122620	-1.56729	UC
HORVU3Hr1G009490	-1.58014	UC
HORVU5Hr1G094890	-1.58171	UC
HORVU3Hr1G028860	-1.61536	UC
HORVU3Hr1G087540	-1.62058	UC
HORVU7Hr1G077370	-1.62125	UC
HORVU2Hr1G098400	-1.63769	UC
HORVU5Hr1G124120	-1.6384	UC
HORVU7Hr1G119200	-1.63877	UC
HORVU3Hr1G057010	-1.69193	UC
HORVU2Hr1G093140	-1.70645	UC
HORVU5Hr1G062510	-1.73312	UC
HORVU5Hr1G020530	-1.76223	UC
HORVU3Hr1G028260	-1.76724	UC
HORVU1Hr1G074550	-1.83171	UC
HORVU6Hr1G000070	-1.8373	UC
HORVU2Hr1G077510	-1.91403	UC
HORVU1Hr1G016870	-1.92309	UC
HORVU4Hr1G000700	-1.92762	UC
HORVU3Hr1G002000	-1.94048	UC
HORVU4Hr1G002390	-1.96015	UC
HORVU4Hr1G089060	-1.98569	UC
HORVU7Hr1G119340	-2.00884	UC
HORVU2Hr1G018430	-2.01337	UC
HORVU7Hr1G011250	-2.02409	UC
HORVU5Hr1G089840	-2.0256	UC
HORVU7Hr1G000280	-2.11052	UC
HORVU4Hr1G012750	-2.18887	UC
HORVU0Hr1G010340	-2.2123	UC
HORVU1Hr1G057680	-2.25851	UC
HORVU4Hr1G028780	-2.30178	UC
HORVU3Hr1G010240	-2.40382	UC
HORVU4Hr1G087800	-2.62128	UC
HORVU7Hr1G007520	-2.85113	UC
HORVU5Hr1G086670	-3.72621	UC

## Sheet: Comparison delta Log2 FC >1 
	Gene ID	Log2FC H2O2 vs control	Log2FC H2O2+LaCl3 vs control
DEGs vs. DEGs:	HORVU2Hr1G116830	5.45647	3.46303
	HORVU7Hr1G093050	3.63544	1.81603
	HORVU3Hr1G016320	3.35295	2.0559
	HORVU5Hr1G080820	3.16675	1.36291
	HORVU3Hr1G083740	3.07335	1.43605
	HORVU3Hr1G020490	3.07319	1.66483
	HORVU5Hr1G097930	2.99405	1.72661
	HORVU2Hr1G078510	2.71239	1.58234
	HORVU7Hr1G093080	2.70616	1.07258
	HORVU5Hr1G053700	2.65596	1.5347
	HORVU3Hr1G071120	2.6169	1.48836
	HORVU6Hr1G077710	2.54197	1.45051
	HORVU2Hr1G061850	2.4958	1.10315
	HORVU6Hr1G025830	2.36045	1.24844
	HORVU6Hr1G029750	2.33298	1.33975
	HORVU3Hr1G061080	2.46924	0.939704
	HORVU2Hr1G094780	2.72714	-1.45646
	HORVU7Hr1G041260	2.04007	-0.826929
	HORVU0Hr1G002410	1.52394	-1.32115
	HORVU2Hr1G002320	1.43927	-1.63259
	HORVU6Hr1G028220	1.38682	-1.08114
	HORVU5Hr1G108670	1.38387	-0.999599
	HORVU7Hr1G052500	1.27633	-0.89472
	HORVU6Hr1G035470	-1.04861	-2.08295
	HORVU3Hr1G022260	-1.23023	-2.32741
	HORVU2Hr1G077180	-1.75083	-2.96387
	HORVU3Hr1G105300	-2.15724	-0.962925
	HORVU5Hr1G011730	-2.44497	-1.03748
	HORVU2Hr1G022540	-2.47819	-1.2201
	HORVU3Hr1G068410	-2.61443	-1.47068
	HORVU1Hr1G063780	-3.17871	-1.55648
	HORVU3Hr1G010190	-3.31618	-1.85317
	HORVU5Hr1G110090	-3.72793	-1.67029
	HORVU7Hr1G072670	-3.95695	-2.5352
	HORVU1Hr1G072890	-4.15954	-2.94151
	HORVU5Hr1G080300	-4.55613	-3.36459
DEGs vs. UCs:	HORVU1Hr1G082310	3.38994	UC
	HORVU3Hr1G056100	3.20787	UC
	HORVU6Hr1G078510	3.00916	UC
	HORVU5Hr1G093140	2.99649	UC
	HORVU5Hr1G080450	2.98285	UC
	HORVU4Hr1G062830	2.82383	UC
	HORVU5Hr1G072700	2.74441	UC
	HORVU5Hr1G068450	2.68163	UC
	HORVU0Hr1G016780	2.4877	UC
	HORVU3Hr1G072810	2.47138	UC
	HORVU1Hr1G082470	2.46466	UC
	HORVU1Hr1G044080	2.45861	UC
	HORVU6Hr1G054430	2.39344	UC
	HORVU4Hr1G009800	2.37098	UC
	HORVU1Hr1G076730	2.31841	UC
	HORVU1Hr1G069620	2.30121	UC
	HORVU1Hr1G063390	2.28774	UC
	HORVU7Hr1G036500	2.28618	UC
	HORVU1Hr1G057410	2.24717	UC
	HORVU4Hr1G025180	2.20137	UC
	HORVU6Hr1G090200	2.19955	UC
	HORVU5Hr1G081820	2.19642	UC
	HORVU1Hr1G056820	2.19569	UC
	HORVU2Hr1G092710	2.18853	UC
	HORVU1Hr1G078860	2.14499	UC
	HORVU2Hr1G004640	2.13509	UC
	HORVU7Hr1G092710	2.11971	UC
	HORVU7Hr1G041230	2.05991	UC
	HORVU2Hr1G110180	2.05743	UC
	HORVU4Hr1G071100	2.03643	UC
	HORVU2Hr1G100870	2.00059	UC
	HORVU3Hr1G065610	1.98926	UC
	HORVU7Hr1G030730	1.98543	UC
	HORVU2Hr1G094230	1.97125	UC
	HORVU1Hr1G044040	1.96384	UC
	HORVU2Hr1G010800	1.93687	UC
	HORVU3Hr1G087320	1.90736	UC
	HORVU6Hr1G016480	1.89954	UC
	HORVU4Hr1G076820	1.89916	UC
	HORVU5Hr1G069730	1.87641	UC
	HORVU6Hr1G090280	1.85119	UC
	HORVU2Hr1G022960	1.84631	UC
	HORVU3Hr1G020520	1.84211	UC
	HORVU4Hr1G076850	1.80238	UC
	HORVU5Hr1G059900	1.8015	UC
	HORVU2Hr1G100480	1.78824	UC
	HORVU2Hr1G046290	1.78571	UC
	HORVU2Hr1G048520	1.7758	UC
	HORVU4Hr1G090090	1.75782	UC
	HORVU7Hr1G114700	1.73245	UC
	HORVU5Hr1G080900	1.69778	UC
	HORVU7Hr1G034350	1.68655	UC
	HORVU2Hr1G083090	1.68166	UC
	HORVU5Hr1G093960	1.67791	UC
	HORVU4Hr1G056470	1.67419	UC
	HORVU5Hr1G093860	1.66609	UC
	HORVU6Hr1G077780	1.6585	UC
	HORVU1Hr1G008940	1.64794	UC
	HORVU3Hr1G000150	1.6417	UC
	HORVU6Hr1G001060	1.64005	UC
	HORVU5Hr1G097560	1.62174	UC
	HORVU6Hr1G077770	1.61025	UC
	ENSRNA049489212	1.60692	UC
	HORVU2Hr1G040830	1.59631	UC
	HORVU4Hr1G024500	1.59337	UC
	HORVU2Hr1G027080	1.58838	UC
	HORVU2Hr1G123270	1.58824	UC
	HORVU2Hr1G083430	1.58783	UC
	HORVU3Hr1G087310	1.58536	UC
	HORVU6Hr1G088140	1.57834	UC
	HORVU3Hr1G055450	1.57212	UC
	HORVU3Hr1G036380	1.56434	UC
	HORVU5Hr1G112930	1.55859	UC
	HORVU2Hr1G035160	1.55134	UC
	HORVU3Hr1G108630	1.53038	UC
	HORVU1Hr1G080680	1.52823	UC
	HORVU7Hr1G120120	1.51642	UC
	HORVU7Hr1G089240	1.51198	UC
	HORVU2Hr1G027760	1.50178	UC
	HORVU7Hr1G026290	1.49217	UC
	HORVU5Hr1G087880	1.48486	UC
	HORVU7Hr1G116400	1.47381	UC
	HORVU4Hr1G054770	1.47067	UC
	HORVU6Hr1G086440	1.46979	UC
	HORVU3Hr1G116080	1.46427	UC
	HORVU1Hr1G074670	1.46196	UC
	HORVU5Hr1G097060	1.45701	UC
	HORVU7Hr1G109590	1.45458	UC
	HORVU7Hr1G043590	1.45358	UC
	HORVU3Hr1G007570	1.4489	UC
	HORVU6Hr1G091180	1.44615	UC
	HORVU3Hr1G105360	1.44362	UC
	HORVU4Hr1G017430	1.44194	UC
	HORVU5Hr1G081500	1.43501	UC
	HORVU5Hr1G118060	1.4257	UC
	HORVU1Hr1G080160	1.42145	UC
	HORVU4Hr1G031530	1.41535	UC
	HORVU3Hr1G068760	1.41483	UC
	HORVU7Hr1G027010	1.41191	UC
	HORVU5Hr1G068060	1.39836	UC
	HORVU7Hr1G008700	1.39639	UC
	HORVU7Hr1G117370	1.3804	UC
	HORVU2Hr1G036280	1.36766	UC
	HORVU5Hr1G048000	1.36608	UC
	HORVU2Hr1G109010	1.36532	UC
	HORVU1Hr1G017120	1.36349	UC
	HORVU3Hr1G065640	1.36315	UC
	HORVU4Hr1G059120	1.35978	UC
	HORVU6Hr1G089340	1.35633	UC
	HORVU2Hr1G027470	1.35117	UC
	HORVU3Hr1G003920	1.35113	UC
	HORVU0Hr1G040410	1.34815	UC
	HORVU7Hr1G052460	1.34212	UC
	HORVU5Hr1G097310	1.33823	UC
	HORVU7Hr1G036570	1.33298	UC
	HORVU6Hr1G077610	1.33106	UC
	HORVU4Hr1G060260	1.3178	UC
	HORVU3Hr1G070300	1.3158	UC
	HORVU5Hr1G092510	1.30962	UC
	HORVU7Hr1G095920	1.30335	UC
	HORVU6Hr1G028790	1.30019	UC
	HORVU6Hr1G089560	1.29989	UC
	HORVU3Hr1G083680	1.29373	UC
	HORVU5Hr1G058300	1.28416	UC
	HORVU1Hr1G052010	1.27145	UC
	HORVU2Hr1G029350	1.26907	UC
	HORVU3Hr1G020390	1.26759	UC
	HORVU1Hr1G081320	1.26665	UC
	HORVU3Hr1G085180	1.26122	UC
	HORVU5Hr1G075920	1.26088	UC
	HORVU1Hr1G084260	1.25416	UC
	HORVU2Hr1G074130	1.2467	UC
	HORVU5Hr1G096370	1.24123	UC
	HORVU3Hr1G031560	1.24061	UC
	HORVU6Hr1G070290	1.24004	UC
	HORVU5Hr1G034180	1.23918	UC
	HORVU1Hr1G029180	1.23792	UC
	HORVU7Hr1G113830	1.22861	UC
	HORVU5Hr1G045700	1.22838	UC
	HORVU7Hr1G033820	1.22522	UC
	HORVU1Hr1G017240	1.22512	UC
	HORVU7Hr1G118020	1.22509	UC
	HORVU5Hr1G098090	1.21091	UC
	HORVU7Hr1G041570	1.20639	UC
	HORVU6Hr1G028690	1.19765	UC
	HORVU1Hr1G083300	1.19198	UC
	HORVU1Hr1G082900	1.19034	UC
	HORVU0Hr1G021850	1.1809	UC
	HORVU3Hr1G030650	1.17972	UC
	HORVU2Hr1G113270	1.17439	UC
	HORVU1Hr1G089440	1.16027	UC
	HORVU5Hr1G014060	1.1571	UC
	HORVU2Hr1G099890	1.15627	UC
	HORVU2Hr1G103890	1.1562	UC
	HORVU5Hr1G072920	1.14985	UC
	HORVU7Hr1G038900	1.14932	UC
	HORVU7Hr1G119910	1.14279	UC
	HORVU0Hr1G038040	1.14272	UC
	HORVU3Hr1G096210	1.14237	UC
	HORVU5Hr1G069700	1.14174	UC
	HORVU2Hr1G019520	1.14044	UC
	HORVU0Hr1G013740	1.14036	UC
	HORVU3Hr1G070340	1.13919	UC
	HORVU1Hr1G075670	1.13423	UC
	HORVU3Hr1G017410	1.13301	UC
	HORVU4Hr1G002650	1.12958	UC
	HORVU1Hr1G090100	1.1294	UC
	HORVU3Hr1G084640	1.1256	UC
	HORVU1Hr1G043710	1.12351	UC
	HORVU5Hr1G107290	1.11503	UC
	HORVU6Hr1G068770	1.10624	UC
	HORVU5Hr1G023730	1.10277	UC
	HORVU1Hr1G047030	1.10122	UC
	HORVU4Hr1G057200	1.09452	UC
	HORVU3Hr1G076480	1.09018	UC
	HORVU7Hr1G086250	1.08776	UC
	HORVU3Hr1G037050	1.08683	UC
	HORVU2Hr1G084270	1.0852	UC
	HORVU6Hr1G018330	1.06744	UC
	HORVU7Hr1G052750	1.06088	UC
	HORVU1Hr1G041890	1.06008	UC
	HORVU4Hr1G074270	1.05327	UC
	HORVU0Hr1G015530	1.05228	UC
	HORVU2Hr1G094020	1.04425	UC
	HORVU2Hr1G002500	1.04045	UC
	HORVU5Hr1G098490	1.03985	UC
	HORVU5Hr1G115100	1.03621	UC
	HORVU2Hr1G088480	1.03495	UC
	HORVU3Hr1G084830	1.02683	UC
	HORVU2Hr1G100100	1.02576	UC
	HORVU5Hr1G046850	1.023	UC
	HORVU7Hr1G041500	1.02116	UC
	HORVU4Hr1G081210	1.01539	UC
	HORVU6Hr1G022680	1.01474	UC
	HORVU2Hr1G038760	1.01029	UC
	HORVU1Hr1G086070	1.00585	UC
	HORVU3Hr1G010620	-1.00048	UC
	HORVU6Hr1G009360	-1.00497	UC
	HORVU7Hr1G034120	-1.01749	UC
	HORVU0Hr1G000780	-1.02297	UC
	HORVU3Hr1G089990	-1.04025	UC
	HORVU1Hr1G009920	-1.04043	UC
	HORVU7Hr1G091100	-1.05617	UC
	HORVU3Hr1G094870	-1.06972	UC
	HORVU6Hr1G021460	-1.07044	UC
	HORVU1Hr1G049100	-1.07224	UC
	HORVU5Hr1G109250	-1.07607	UC
	HORVU1Hr1G054040	-1.07979	UC
	HORVU2Hr1G013400	-1.08951	UC
	HORVU1Hr1G050470	-1.09228	UC
	HORVU3Hr1G113640	-1.09933	UC
	HORVU1Hr1G054020	-1.1061	UC
	HORVU6Hr1G073740	-1.12209	UC
	HORVU5Hr1G059070	-1.13146	UC
	HORVU3Hr1G019360	-1.13378	UC
	HORVU4Hr1G090720	-1.14143	UC
	HORVU7Hr1G007540	-1.14409	UC
	HORVU5Hr1G123550	-1.15515	UC
	HORVU3Hr1G081180	-1.16863	UC
	HORVU3Hr1G017160	-1.1795	UC
	HORVU7Hr1G090830	-1.19017	UC
	HORVU2Hr1G049420	-1.21552	UC
	HORVU4Hr1G022830	-1.21593	UC
	HORVU2Hr1G045970	-1.2171	UC
	HORVU2Hr1G073410	-1.22465	UC
	HORVU3Hr1G070540	-1.22855	UC
	HORVU3Hr1G016490	-1.23811	UC
	HORVU5Hr1G083910	-1.26566	UC
	HORVU3Hr1G080500	-1.28189	UC
	HORVU4Hr1G028050	-1.28518	UC
	HORVU6Hr1G016420	-1.30181	UC
	HORVU5Hr1G111180	-1.30211	UC
	HORVU2Hr1G044450	-1.34984	UC
	HORVU7Hr1G018780	-1.35495	UC
	HORVU4Hr1G050020	-1.35801	UC
	HORVU3Hr1G109160	-1.35898	UC
	HORVU7Hr1G109750	-1.36057	UC
	HORVU6Hr1G005360	-1.38294	UC
	HORVU5Hr1G062450	-1.38846	UC
	HORVU1Hr1G061710	-1.39516	UC
	HORVU5Hr1G110220	-1.3967	UC
	HORVU7Hr1G118560	-1.39682	UC
	HORVU4Hr1G010050	-1.40513	UC
	HORVU5Hr1G069610	-1.42952	UC
	HORVU3Hr1G049810	-1.44452	UC
	HORVU3Hr1G105400	-1.44807	UC
	HORVU1Hr1G003810	-1.45323	UC
	HORVU6Hr1G041770	-1.45382	UC
	HORVU3Hr1G022780	-1.46941	UC
	HORVU7Hr1G028460	-1.47403	UC
	HORVU2Hr1G065000	-1.48134	UC
	HORVU2Hr1G081300	-1.48361	UC
	HORVU6Hr1G065900	-1.50719	UC
	HORVU2Hr1G114980	-1.51415	UC
	HORVU3Hr1G062690	-1.51618	UC
	HORVU3Hr1G003980	-1.52494	UC
	HORVU3Hr1G081230	-1.52512	UC
	HORVU2Hr1G028660	-1.55444	UC
	HORVU6Hr1G059940	-1.55621	UC
	HORVU5Hr1G010880	-1.56282	UC
	HORVU2Hr1G122620	-1.56729	UC
	HORVU3Hr1G009490	-1.58014	UC
	HORVU5Hr1G094890	-1.58171	UC
	HORVU3Hr1G028860	-1.61536	UC
	HORVU3Hr1G087540	-1.62058	UC
	HORVU7Hr1G077370	-1.62125	UC
	HORVU2Hr1G098400	-1.63769	UC
	HORVU5Hr1G124120	-1.6384	UC
	HORVU7Hr1G119200	-1.63877	UC
	HORVU3Hr1G057010	-1.69193	UC
	HORVU2Hr1G093140	-1.70645	UC
	HORVU5Hr1G062510	-1.73312	UC
	HORVU5Hr1G020530	-1.76223	UC
	HORVU3Hr1G028260	-1.76724	UC
	HORVU1Hr1G074550	-1.83171	UC
	HORVU6Hr1G000070	-1.8373	UC
	HORVU2Hr1G077510	-1.91403	UC
	HORVU1Hr1G016870	-1.92309	UC
	HORVU4Hr1G000700	-1.92762	UC
	HORVU3Hr1G002000	-1.94048	UC
	HORVU4Hr1G002390	-1.96015	UC
	HORVU4Hr1G089060	-1.98569	UC
	HORVU7Hr1G119340	-2.00884	UC
	HORVU2Hr1G018430	-2.01337	UC
	HORVU7Hr1G011250	-2.02409	UC
	HORVU5Hr1G089840	-2.0256	UC
	HORVU7Hr1G000280	-2.11052	UC
	HORVU4Hr1G012750	-2.18887	UC
	HORVU0Hr1G010340	-2.2123	UC
	HORVU1Hr1G057680	-2.25851	UC
	HORVU4Hr1G028780	-2.30178	UC
	HORVU3Hr1G010240	-2.40382	UC
	HORVU4Hr1G087800	-2.62128	UC
	HORVU7Hr1G007520	-2.85113	UC
	HORVU5Hr1G086670	-3.72621	UC

## Sheet: Cluster L1 
Category	Gene ID	Log2FC H2O2 vs. control	Log2FC LaCl3+H2O2 vs. control	Functional annotation	Predicted ortholog in A.thaliana
TFs
	HORVU1Hr1G082310	3.38994	UC	AP2/ERF domain containing protein	no
	HORVU6Hr1G078510	3.00916	UC	AP2/ERF domain containing protein	no
	HORVU5Hr1G080450	2.98285	UC	AP2/ERF domain containing protein	no
	HORVU5Hr1G072700	2.74441	UC	AP2/ERF domain containing protein	AT2G44310
	HORVU2Hr1G099890	1.15627	UC	AP2/ERF domain containing protein	no
	HORVU5Hr1G068450	2.68163	UC	AP2/ERF domain containing protein	no
	HORVU3Hr1G030650	1.17972	UC	LEA domain containing protein	AT1G01470 (AtLEA14)
	HORVU5Hr1G118060	1.4257	UC	LEA domain containing protein	no
	HORVU3Hr1G083680	1.29373	UC	LEA domain containing protein	no
	HORVU1Hr1G029180	1.23792	UC	LEA domain containing protein	no
	HORVU1Hr1G044080	2.45861	UC	LEA domain containing protein	AT1G65690 (AtNHL6)
	HORVU6Hr1G028790	1.30019	UC	WRKY domain containing protein	AT4G31800 (AtWRKY18)
	HORVU7Hr1G113830	1.22861	UC	WRKY domain containing protein	AT4G31800 (AtWRKY18)
	HORVU1Hr1G069620	2.30121	UC	WRKY domain containing protein	no
	HORVU2Hr1G040830	1.59631	UC	F-box domain containing protein	no
	HORVU4Hr1G071100	2.03643	UC	F-Box domain containing protein	no
	HORVU5Hr1G069730	1.87641	UC	zf hd domain containing protein	no
	HORVU3Hr1G085180	1.26122	UC	Myb-like domain containing protein	AT2G38090 (no gene name)
	HORVU5Hr1G097560	1.62174	UC	HTH myb domain containing	no
	HORVU4Hr1G017430	1.44194	UC	NAC domain containing protein	AT1G01720 (AtNAC002)
	HORVU3Hr1G036380	1.56434	UC	NAC domain containing protein	AT5G17260 (AtNAC086)
	HORVU2Hr1G035160	1.55134	UC	LOB domain containing protein	AT5G67420 (AtLBD37)
	HORVU2Hr1G092710	2.18853	UC	HOMEOBOX domain containing protein	no
	HORVU3Hr1G000150	1.6417	UC	BHLH domain containing protein	no
	HORVU5Hr1G093960	1.67791	UC	BHLH domain containing protein	AT3G23100 (AtXRCC4)
Heat shock
	HORVU7Hr1G036500	2.28618	UC	SHSP domain containing protein	no
	HORVU3Hr1G020390	1.26759	UC	SHSP domain containing protein	AT5G12020 (AtHSP17.6)
	HORVU7Hr1G036570	1.33298	UC	SHSP domain containing protein	no
	HORVU3Hr1G020520	1.84211	UC	SHSP domain containing protein	AT5G12020 (AtHSP17.6)
	HORVU6Hr1G028690	1.19765	UC	Clp R domain containing protein	AT2G25140 (AtClpB4/AtHSP98.7)
	HORVU4Hr1G090090	1.75782	UC	HSF_domain containing protein	AT3G24520 (AtHsfC1)
	HORVU1Hr1G008940	1.64794	UC	J domain containing protein	AT5G18750 (AtDJC44)
Hormones
JA	HORVU4Hr1G025180	2.20137	UC	Uncharacterized protein	AT2G27690(AtCYP94C1)
	HORVU1Hr1G080680	1.52823	UC	Uncharacterized protein	AT3G48520 (AtCYP94B3)
	HORVU5Hr1G098090	1.21091	UC	Uncharacterized protein	AT5G42650 (AtCYP74A/AtAOS)
	HORVU7Hr1G041230	2.05991	UC	TIFY domain containing protein	no
	HORVU4Hr1G076850	1.80238	UC	TIFY domain containing protein	no
GA3	HORVU3Hr1G056100	3.20787	UC	Uncharacterized protein	AT3G14680 (AtCYP72A14)
	HORVU3Hr1G072810	2.47138	UC	Fe2OG dioxygenase domain containing protein	AT4G25420 (AtGA20ox1)
	HORVU1Hr1G076730	2.31841	UC	Fe2OG dioxygenase domain containing protein	AT1G78440 (AtGA2OX1)
Cytokinin	HORVU3Hr1G105360	1.44362	UC	Cytokinin dehydrogenase	AT2G41510 (AtCKX1)
ABA	HORVU0Hr1G016780	2.4877	UC	Uncharacterized protein	AT4G19230 (AtCYP707A1)
Auxin	HORVU1Hr1G086070	1.00585	UC	Auxin responsive protein	no
	HORVU7Hr1G033820	1.22522	UC	Auxin responsive protein	AT1G19220 (AtIAA22)
	HORVU6Hr1G088140	1.57834	UC	Auxin responsive protein	no
Ca2+ signaling
Ca2+ sensors	HORVU5Hr1G014060	1.1571	UC	Uncharacterized protein	AT3G22930 (AtCML11)
	HORVU1Hr1G057410	2.24717	UC	Uncharacterized protein	AT1G24620 (AtCML25)
	HORVU5Hr1G048000	1.36608	UC	Predicted protein	no,but Os_CML26 in rice
Ca2+ -associated kinases	HORVU2Hr1G027080	1.58838	UC	Non-specific serine/threonine protein kinase,	AT3G17510 (AtCIPK1)
	HORVU1Hr1G078860	2.14499	UC	Protein kinase domain containing protein	AT2G32510 (AtMAPKKK17)
	HORVU3Hr1G065640	1.36315	UC	Protein kinase domain containing protein	AT2G31510 (AtMAPKKK17)
	HORVU3Hr1G065610	1.98926	UC	Uncharacterized protein	AT4G26890 (AtMAPKKK16)
	HORVU4Hr1G057200	1.09452	UC	Protein kinase domain containing protein	AT3G45640 (AtMPK3)
Kinases (Diverse)
	HORVU4Hr1G024500	1.59337	UC	Protein kinase domain containing protein	AT3G51740 (AtIMK2)
	HORVU7Hr1G109590	1.45458	UC	Protein kinase domain containing protein	AT2G07180 (AtPBL17)
	HORVU1Hr1G080160	1.42145	UC	Protein kinase domain containing protein	AT5G63370 (AtCDKG1)
	HORVU3Hr1G003920	1.35113	UC	Protein kinase domain containing protein	AT1G70740 (AtCRK43)
	HORVU3Hr1G031560	1.24061	UC	Protein kinase domain containing protein	AT4G28880 (AtCKL3)
	HORVU1Hr1G074670	1.46196	UC	Protein kinase domain containing protein	AT1G75950 (AtASK1)
	HORVU2Hr1G103890	1.1562	UC	Protein kinase domain containing protein	AT1G16670 (AtCRPK1)
	HORVU0Hr1G015530	1.05228	UC	Protein kinase domain containing protein	AT1G16670 (AtCRPK1)
	HORVU7Hr1G038900	1.14932	UC	Protein kinase domain containing protein	AT1G60060 (no gene name)
	HORVU7Hr1G027010	1.41191	UC	Protein kinase domain containing protein	AT1G52540 (no gene name)
	HORVU1Hr1G075670	1.13423	UC	Protein kinase domain containing protein	AT5G25930 (AtHSL3)
Others
	HORVU4Hr1G062830	2.82383	UC	FAD-binding PCMH-type domain containing protein	AT5G44400 (AtBBE26)
	HORVU6Hr1G054430	2.39344	UC	Methionine aminopeptidase	AT1G13270 (AtMAP1C)
	HORVU4Hr1G009800	2.37098	UC	Aminotran_1_2 domain containing protein	AT4G37770 (AtACS8)
	HORVU6Hr1G090200	2.19955	UC	Predicted protein	AT3G57880 (AtMCTP3)
	HORVU2Hr1G004640	2.13509	UC	Uncharacterized protein	AT3G26310 (AtCYP71B35)
	HORVU7Hr1G030730	1.98543	UC	Uncharacterized protein	AT3G29670 (AtPMAT2)
	HORVU2Hr1G094230	1.97125	UC	Aminotran_1_2 domain containing protein	AT4G11280 (AtACS6)
	HORVU2Hr1G010800	1.93687	UC	Expansin	AT1G20190 (AtEXPA11)
	HORVU2Hr1G046290	1.78571	UC	AAA domain containing protein	AT2G18193 (no name)
	HORVU1Hr1G063390	2.28774	UC	AAA domain containing protein	AT5G40010 (AtAATP1)
	HORVU2Hr1G022960	1.84631	UC	CASP-like protein	no
	HORVU5Hr1G059900	1.8015	UC	AN1-type domain containing protein	AT3G28210 (AtPMZ)
	HORVU2Hr1G100480	1.78824	UC	Uncharacterized protein	AT4G31350 (no name)
	HORVU5Hr1G080900	1.69778	UC	RRM domain containing protein	AT2G32510 (AtDRD1)
	HORVU7Hr1G034350	1.68655	UC	Chalcone--flavanone isomerase	AT2G26310 (AtFAP2)
	HORVU2Hr1G083090	1.68166	UC	Predicted protein	AT1G24530
	HORVU4Hr1G056470	1.67419	UC	FA_desaturase domain containing protein	AT3G11170 (AtFAD7)
	HORVU6Hr1G077780	1.6585	UC	Uncharacterized protein	AT4G08950 (AtEXO )
	HORVU6Hr1G077770	1.61025	UC	Uncharacterized protein	AT4G08950 (AtEXO )
	HORVU6Hr1G001060	1.64005	UC	Acidic protein	no
	HORVU2Hr1G083430	1.58783	UC	BTB domain containing protein	no
	HORVU3Hr1G055450	1.57212	UC	Aa_trans domain containing protein	AT5G41800 (no name )
	HORVU5Hr1G112930	1.55859	UC	C2H2-type domain containing protein	no
	HORVU7Hr1G120120	1.51642	UC	LysM domain containing protein	no
	HORVU2Hr1G027760	1.50178	UC	Uncharacterized protein	AT5G15640 (AtSLC25A44)
	HORVU7Hr1G026290	1.49217	UC	Dirigent protein	no
	HORVU5Hr1G087880	1.48486	UC	Uncharacterized protein	AT5G65980 (AtPILS7)
	HORVU7Hr1G116400	1.47381	UC	C2 domain containing protein	AT4G34150 (no name)
	HORVU4Hr1G054770	1.47067	UC	Uncharacterized protein	AT4G16120 (AtSEB1)
	HORVU3Hr1G116080	1.46427	UC	30S ribosomal protein S17, chloroplastic	AT1G49400 (Atemb1129)
	HORVU5Hr1G097060	1.45701	UC	Protein-serine/threonine phosphatase, EC 3.1.3.16	AT4G33920
	HORVU7Hr1G043590	1.45358	UC	Uncharacterized protein	AT4G18910 (AtNLM2)
	HORVU5Hr1G081500	1.43501	UC	Staygreen domain containing protein	AT4G22920 (AtNYE1)
	HORVU3Hr1G068760	1.41483	UC	Predicted protein	no
	HORVU5Hr1G068060	1.39836	UC	Uncharacterized protein	AT3G48850 (AtPHT3;2)
	HORVU7Hr1G117370	1.3804	UC	Uncharacterized protein	AT4G35985 (AtEL4G)
	HORVU2Hr1G036280	1.36766	UC	Uncharacterized protein	AT5G48150 (AtPAT1)
	HORVU2Hr1G109010	1.36532	UC	VQ domain containing protein	no
	HORVU1Hr1G017120	1.36349	UC	Uncharacterized protein	AT2G47060 (AtCARK3)
	HORVU4Hr1G059120	1.35978	UC	Uncharacterized protein	AT1G78570 (AtRHM1)
	HORVU6Hr1G089340	1.35633	UC	Epimerase domain containing protein	AT5G2100 (AtCCR1)
	HORVU2Hr1G027470	1.35117	UC	Uncharacterized protein	AT2G46950 (AtCYP709B2)
	HORVU2Hr1G048520	1.7758	UC	RING-type domain containing protein	no
	HORVU7Hr1G052460	1.34212	UC	RING-type domain containing protein	no
	HORVU2Hr1G074130	1.2467	UC	RING-type domain containing protein	no
	HORVU6Hr1G089560	1.29989	UC	RING-type domain containing protein	AT2G35930 (AtPUB23)
	HORVU6Hr1G077610	1.33106	UC	RING-type domain containing protein	AT3G05200 (AtATL6)
	HORVU3Hr1G070300	1.3158	UC	ATP-dependent 6-phosphofructokinase, ATP-PFK, Phosphofructokinase, EC 2.7.1.11 (Phosphohexokinase)	AT4G26270 (AtPFK3)
	HORVU5Hr1G092510	1.30962	UC	C2 NT-type domain containing protein	no
	HORVU7Hr1G095920	1.30335	UC	Uncharacterized protein	AT3G18170 (no name)
	HORVU5Hr1G058300	1.28416	UC	Trehalose 6-phosphate phosphatase	AT4G39770 (AtTPPH)
	HORVU1Hr1G052010	1.27145	UC	C2 NT-type domain containing protein	AT1G42550 (AtPMI6)
	HORVU2Hr1G029350	1.26907	UC	UMP-CMP kinase, EC 2.7.4.14 (Deoxycytidylate kinase, CK, dCMP kinase) (Uridine monophosphate/cytidine monophosphate kinase, UMP/CMP kinase, UMP/CMPK)	AT5G26667 (AtPYR6)
	HORVU1Hr1G081320	1.26665	UC	WD repeat-containing protein 55	AT2G34260
	HORVU5Hr1G075920	1.26088	UC	rRNA domain N-glycosidase	AT4G29090
	HORVU1Hr1G084260	1.25416	UC	Uncharacterized protein	AT1G15110 (AtPSS1)
	HORVU5Hr1G096370	1.24123	UC	UDP-glucose 6-dehydrogenase	AT5G15490 (AtUGD3)
	HORVU5Hr1G045700	1.22838	UC	Hexosyltransferase	AT2G38650 (AtGAUT7)
	HORVU7Hr1G118020	1.22509	UC	Peptidase A1 domain containing protein	AT2G17760
	HORVU7Hr1G041570	1.20639	UC	Uncharacterized protein	AT5G37710
	HORVU1Hr1G082900	1.19034	UC	acidPPc domain containing protein	AT1G15080(AtLPP2)
	HORVU0Hr1G021850	1.1809	UC	FLZ-type domain containing protein	no
	HORVU2Hr1G113270	1.17439	UC	Uncharacterized protein	AT3G16150 (AtASPGb1)
	HORVU1Hr1G089440	1.16027	UC	Putative rRNA methyltransferase, (2'-O-ribose RNA methyltransferase SPB1 homolog)	AT4G25730 (AtTRM7B)
	HORVU5Hr1G072920	1.14985	UC	Uncharacterized protein	AT3G12630 (AtSAP5)
	HORVU7Hr1G119910	1.14279	UC	Uncharacterized protein	AT3G19970
	HORVU0Hr1G038040	1.14272	UC	Acidic protein	no
	HORVU3Hr1G096210	1.14237	UC	Exostosin domain containing protein	AT5G61840 (AtGUT1)
	HORVU2Hr1G019520	1.14044	UC	Usp domain containing protein	no
	HORVU3Hr1G017410	1.13301	UC	KIP family protein	AT5G58320 (AtNET4A)
	HORVU4Hr1G002650	1.12958	UC	Uncharacterized protein	AT4G11650 (AtOSM34 )
	HORVU1Hr1G090100	1.1294	UC	Predicted protein	AT4G01037 (AtWTF1)
	HORVU1Hr1G043710	1.12351	UC	Uncharacterized protein	AT1G03610
	HORVU5Hr1G107290	1.11503	UC	DUF569 domain containing protein	AT1G69890
	HORVU6Hr1G068770	1.10624	UC	Predicted protein	AT3G50910
	HORVU5Hr1G023730	1.10277	UC	Bet_v_ domain containing protein	no
	HORVU1Hr1G047030	1.10122	UC	Uncharacterized protein	AT1G64940 (AtCYP89A6)
	HORVU3Hr1G076480	1.09018	UC	Uncharacterized protein	AT2G41790
	HORVU3Hr1G037050	1.08683	UC	CRAL-TRIO domain containing protein	AT1G22180
	HORVU2Hr1G084270	1.0852	UC	RNA_pol_Rpb5_C domain containing protein	AT3G22320 (AtRPB5A)
	HORVU6Hr1G018330	1.06744	UC	Uncharacterized protein	AT5G64420
	HORVU7Hr1G052750	1.06088	UC	Cytochrome b561 and DOMON domain containing protein	AT5G47530
	HORVU4Hr1G074270	1.05327	UC	40S ribosomal protein S27	AT3G61110 (AtRS27A)
	HORVU2Hr1G002500	1.04045	UC	Uncharacterized protein	AT5G48930 (AtHCT)
	HORVU5Hr1G098490	1.03985	UC	Uncharacterized protein	AT4G07960 (AtCSLC12)
	HORVU5Hr1G115100	1.03621	UC	GRAM domain containing protein	AT5G13200 (AtGER5)
	HORVU2Hr1G088480	1.03495	UC	Uncharacterized protein	AT3G16840 (AtRH13)
	HORVU3Hr1G084830	1.02683	UC	Uncharacterized protein	AT3G55840
	HORVU2Hr1G100100	1.02576	UC	Protein-serine/threonine phosphatase	AT4G28400
	HORVU7Hr1G041500	1.02116	UC	Predicted protein	AT1G73540 (AtNUDT21)
	HORVU4Hr1G081210	1.01539	UC	Uncharacterized protein	AT1G01190 (AtCYP78A8)
	HORVU2Hr1G038760	1.01029	UC	C2H2-type domain containing protein	AT2G41835 (AtSAP11)
	HORVU5Hr1G093140	2.99649	UC	Uncharacterized protein	no
	HORVU5Hr1G081820	2.19642	UC	Uncharacterized protein	no
	HORVU1Hr1G056820	2.19569	UC	Uncharacterized protein	no
	HORVU7Hr1G092710	2.11971	UC	Uncharacterized protein	no
	HORVU2Hr1G110180	2.05743	UC	Uncharacterized protein	no
	HORVU2Hr1G100870	2.00059	UC	Uncharacterized protein	no
	HORVU1Hr1G044040	1.96384	UC	Uncharacterized protein	no
	HORVU3Hr1G087320	1.90736	UC	Uncharacterized protein	no
	HORVU6Hr1G016480	1.89954	UC	Uncharacterized protein	no
	HORVU4Hr1G076820	1.89916	UC	Uncharacterized protein	no
	HORVU5Hr1G093860	1.66609	UC	Uncharacterized protein	no
	ENSRNA049489212	1.60692	UC	Uncharacterized protein	no
	HORVU2Hr1G123270	1.58824	UC	Uncharacterized protein	no
	HORVU3Hr1G087310	1.58536	UC	Uncharacterized protein	no
	HORVU3Hr1G108630	1.53038	UC	Uncharacterized protein	no
	HORVU7Hr1G089240	1.51198	UC	Predicted protein	no
	HORVU6Hr1G086440	1.46979	UC	Uncharacterized protein	no
	HORVU3Hr1G007570	1.4489	UC	Uncharacterized protein	no
	HORVU6Hr1G091180	1.44615	UC	Uncharacterized protein	no
	HORVU4Hr1G031530	1.41535	UC	Uncharacterized protein	no
	HORVU7Hr1G008700	1.39639	UC	Uncharacterized protein	no
	HORVU4Hr1G060260	1.3178	UC	Uncharacterized protein	no
	HORVU1Hr1G083300	1.19198	UC	Predicted proteinprotein	no
	HORVU5Hr1G069700	1.14174	UC	Uncharacterized protein	no
	HORVU3Hr1G070340	1.13919	UC	Uncharacterized protein	no
	HORVU3Hr1G084640	1.1256	UC	Uncharacterized protein	no
	HORVU7Hr1G086250	1.08776	UC	Uncharacterized protein	no
	HORVU1Hr1G082470	2.46466	UC	Uncharacterized protein	no
	HORVU5Hr1G046850	1.023	UC	Uncharacterized protein	no
	HORVU6Hr1G022680	1.01474	UC	Uncharacterized protein	no
	HORVU1Hr1G041890	1.06008	UC	Uncharacterized protein	no
	HORVU0Hr1G013740	1.14036	UC	Uncharacterized protein	no
	HORVU1Hr1G017240	1.22512	UC	Uncharacterized protein	no
	HORVU6Hr1G070290	1.24004	UC	Uncharacterized protein	no
	HORVU5Hr1G034180	1.23918	UC	Uncharacterized protein	no
	HORVU0Hr1G040410	1.34815	UC	Uncharacterized protein	no
	HORVU5Hr1G097310	1.33823	UC	Uncharacterized protein	no
	HORVU7Hr1G114700	1.73245	UC	Uncharacterized protein	no
	HORVU6Hr1G090280	1.85119	UC	Uncharacterized protein	no
	HORVU2Hr1G094020	1.04425	UC	Uncharacterized protein	no

## Sheet: Cluster L2
Category	Gene ID	Log2FC H2O2 vs. control	Log2FC LaCl3+H2O2 v.s control	Functional annotation	Predicted protein ortholog in A.thaliana
TFs
	HORVU4Hr1G000700	-1.92762	UC	AP2/ERF domain containing protein	AT3G23240 (AtERF1)
	HORVU3Hr1G010240	-2.40382	UC	AP2/ERF domain containing protein	AT1G68840 (AtRAV2)
	HORVU4Hr1G002390	-1.96015	UC	WRKY domain containing protein	no
	HORVU3Hr1G010620	-1.00048	UC	F-box domain containing protein	no
	HORVU7Hr1G018780	-1.35495	UC	HOMEOBOX domain containing protein	AT5G06710 (AtHAT14)
	HORVU6Hr1G065900	-1.50719	UC	OVATE domain containing repressor	no
	HORVU5Hr1G083910	-1.26566	UC	Uncharacterized protein
Kinases (Diverse)
	HORVU3Hr1G094870	-1.06972	UC	Histidine kinase	AT1G27320 (AtHK3)
	HORVU5Hr1G059070	-1.13146	UC	Protein kinase domain containing protein	AT1G24030 (AtPBL28)
	HORVU5Hr1G123550	-1.15515	UC	Protein kinase domain containing protein	AT4G21400 (AtCRK28)
	HORVU6Hr1G005360	-1.38294	UC	Protein kinase domain containing protein	AT1G21240(AtWAK3)
	HORVU5Hr1G089840	-2.0256	UC	Protein kinase domain containing protein	AT1G21230 (AtWAK5)
	HORVU3Hr1G022780	-1.46941	UC	Protein kinase domain containing protein	AT5G02070 (AtWAKL20)
	HORVU2Hr1G098400	-1.63769	UC	Non-specific serine/threonine protein kinase	AT1G56130
	HORVU5Hr1G020530	-1.76223	UC	Protein kinase domain containing protein	AT3G55550 (AtLecRK-S.4)
	HORVU7Hr1G007520	-2.85113	UC	Protein kinase domain containing protein	AT3G47570
Peroxidases
	HORVU6Hr1G009360	-1.00497	UC	Peroxidase	AT5G05340 (AtPRX52)
	HORVU2Hr1G018430	-2.01337	UC	Uncharacterized protein	AT5G05340 (AtPRX52)
	HORVU1Hr1G016870	-1.92309	UC	Peroxidase	AT5G66390 (AtPRX72)
Cell Wall
	HORVU3Hr1G081230	-1.52512	UC	Expansin	AT2G37640 (AtEXPA3)
	HORVU3Hr1G081180	-1.16863	UC	Expansin	AT1G69530 (AtEXPA1)
	HORVU7Hr1G119340	-2.00884	UC	Expansin-like EG45 domain containing protein	no
	HORVU2Hr1G044450	-1.34984	UC	Glucan endo-1,3-beta-D-glucosidase	AT5G55180 ( no name)
	HORVU7Hr1G091100	-1.05617	UC	Glucan endo-1,3-beta-D-glucosidase	AT2G05790
Transporters
	HORVU5Hr1G110220	-1.3967	UC	H(+)/Pi cotransporter	AT3G54700 (AtPHT1;7 )
	HORVU1Hr1G009920	-1.04043	UC	ABC transporter domain containing protein	AT3G55090 (AtABCG16)
	HORVU3Hr1G028860	-1.61536	UC	AA_permease_C domain containing protein	AT2G34960 (AtCAT5)
Others
	HORVU0Hr1G000780	-1.02297	UC	BOWMAN BIRK domain containing protein	no
	HORVU3Hr1G003980	-1.52494	UC	BOWMAN BIRK domain containing protein	no
	HORVU6Hr1G021460	-1.07044	UC	CCT domain containing protein	no
	HORVU1Hr1G049100	-1.07224	UC	GST C-terminal domain containing protein	AT1G10360 (AtGSTU18)
	HORVU5Hr1G109250	-1.07607	UC	Chlorophyll a-b binding protein, chloroplastic	AT1G29930 (AtCAB1)
	HORVU2Hr1G013400	-1.08951	UC	Response regulatory domain containing protein	AT5G02810 (AtPRR7)
	HORVU3Hr1G113640	-1.09933	UC	Uncharacterized protein	AT3G14460
	HORVU1Hr1G054020	-1.1061	UC	Uncharacterized protein	AT1G12110 (AtNRT1.1.)
	HORVU6Hr1G073740	-1.12209	UC	Predicted protein	AT5G17640 (AtASG1)
	HORVU3Hr1G019360	-1.13378	UC	Uncharacterized protein	AT4G29420
	HORVU4Hr1G090720	-1.14143	UC	Dirigent protein	no
	HORVU7Hr1G007540	-1.14409	UC	C2 domain containing protein	no
	HORVU7Hr1G090830	-1.19017	UC	Uncharacterized protein	AT5G14420 (AtRGLG2)
	HORVU2Hr1G049420	-1.21552	UC	Uncharacterized protein	AT4G17790
	HORVU2Hr1G073410	-1.22465	UC	HVA22-like protein	no
	HORVU3Hr1G070540	-1.22855	UC	Peptidase_M28 domain containing protein	AT5G19740 (AtLAMP1)
	HORVU3Hr1G016490	-1.23811	UC	Alliinase_C domain containing protein	AT4G24670 (AtTAR2 )
	HORVU3Hr1G080500	-1.28189	UC	Uncharacterized protein	AT2G30750 (AtCYP71A12)
	HORVU6Hr1G016420	-1.30181	UC	Uncharacterized protein	AT5G62960
	HORVU5Hr1G111180	-1.30211	UC	Patatin, EC 3.1.1.-	AT5G04040 (AtSDP1)
	HORVU4Hr1G050020	-1.35801	UC	Reticulon like protein	AT3G10915 (AtRTNLB16)
	HORVU3Hr1G109160	-1.35898	UC	Uncharacterized protein	AT2G26870 (AtNPC2)
	HORVU7Hr1G109750	-1.36057	UC	Peptidase A1 domaincontaining protein	AT5G10770
	HORVU1Hr1G061710	-1.39516	UC	Uncharacterized protein	AT1G17840 (AtWBC11)
	HORVU7Hr1G118560	-1.39682	UC	Phytocyanin domain containing protein	no
	HORVU3Hr1G049810	-1.44452	UC	C2H2 domain containing	AT1G55110 (AtIDD7)
	HORVU3Hr1G105400	-1.44807	UC	Uncharacterized protein	AT4G16260 (no gene name)
	HORVU6Hr1G041770	-1.45382	UC	Uncharacterized protein	AT5G56750 (AtNDL1)
	HORVU7Hr1G028460	-1.47403	UC	BSD domain containing protein	no
	HORVU5Hr1G124120	-1.6384	UC	Fe2OG dioxygenase domain containing protein	AT5G06960 (AtGA5)
	HORVU2Hr1G114980	-1.51415	UC	Fe2OG dioxygenase domain containing protein	no
	HORVU3Hr1G062690	-1.51618	UC	Probable purine permease	no
	HORVU2Hr1G028660	-1.55444	UC	Protease inhibitor	no
	HORVU6Hr1G059940	-1.55621	UC	GRAM domain containing protein	AT5G23370 (AtGEML8)
	HORVU5Hr1G010880	-1.56282	UC	Germin like protein	AT5G38960
	HORVU2Hr1G122620	-1.56729	UC	Phytocyanin domain containing protein	no
	HORVU3Hr1G009490	-1.58014	UC	Non-specific lipid transfer protein	no
	HORVU3Hr1G087540	-1.62058	UC	PPR_long domain containing protein	AT5G39980 (Atemb3140)
	HORVU7Hr1G119200	-1.63877	UC	Uncharacterized protein	no
	HORVU3Hr1G057010	-1.69193	UC	CASP-like protein	AT4G16745
	HORVU2Hr1G093140	-1.70645	UC	Abhydrolase_3 domain containing protein	AT1G47480 (AtCXE2)
	HORVU5Hr1G062510	-1.73312	UC	Uncharacterized protein	AT1G47480 (AtCXE2)
	HORVU1Hr1G074550	-1.83171	UC	Uncharacterized protein	AT1G22540 (AtNPF5.10)
	HORVU6Hr1G000070	-1.8373	UC	Rhodanese domain containing protein	no
	HORVU3Hr1G002000	-1.94048	UC	Germin-like protein	AT5G38960
	HORVU4Hr1G089060	-1.98569	UC	L-gulonolactone oxidase	AT2G46740 (AtGULLO5)
	HORVU3Hr1G017160	-1.1795	UC	RING-type domain containing protein	AT5G01960
	HORVU3Hr1G028260	-1.76724	UC	RING-type E3 ubiquitin transferase	no
	HORVU3Hr1G089990	-1.04025	UC	RING-CH-type domain containing protein	AT2G02960
	HORVU7Hr1G011250	-2.02409	UC	RING-type domain containing protein	no
	HORVU4Hr1G012750	-2.18887	UC	Predicted protein	AT5G50300 (AtAZG2)
	HORVU1Hr1G057680	-2.25851	UC	Uncharacterized protein	AT4G16260 (no gene name)
	HORVU1Hr1G054040	-1.07979	UC	AAI domain containing protein	no
	HORVU4Hr1G087800	-2.62128	UC	AAI domain containing protein	no
	HORVU5Hr1G086670	-3.72621	UC	Flavin-containing monooxygenase	AT1G19250 (AtFMO1)
	HORVU1Hr1G050470	-1.09228	UC	Uncharacterized protein	no
	HORVU4Hr1G022830	-1.21593	UC	Predicted protein	no
	HORVU2Hr1G045970	-1.2171	UC	Uncharacterized protein	no
	HORVU4Hr1G028050	-1.28518	UC	Uncharacterized protein	no
	HORVU4Hr1G010050	-1.40513	UC	Predicted protein	no
	HORVU5Hr1G069610	-1.42952	UC	Uncharacterized protein	no
	HORVU1Hr1G003810	-1.45323	UC	Uncharacterized protein	no
	HORVU2Hr1G065000	-1.48134	UC	Predicted protein	no
	HORVU2Hr1G081300	-1.48361	UC	Predicted protein	no
	HORVU2Hr1G077510	-1.91403	UC	Uncharacterized protein	no
	HORVU7Hr1G000280	-2.11052	UC	Predicted protein	no
	HORVU0Hr1G010340	-2.2123	UC	Predicted protein	no
	HORVU4Hr1G028780	-2.30178	UC	Uncharacterized protein	no
	HORVU7Hr1G034120	-1.01749	UC	Predicted protein	no
	HORVU7Hr1G077370	-1.62125	UC	Uncharacterized protein	no
	HORVU5Hr1G062450	-1.38846	UC	Uncharacterized protein	no
	HORVU5Hr1G094890	-1.58171	UC	Uncharacterized protein	no

## Sheet: Cluster L3
Category	Gene ID	Log2FC H2O2 vs. control	Log2FC leaf LaCl3+H2O2 vs. control	Functional annotation	Predicted ortholog in A. thaliana
TFs
	HORVU3Hr1G016320	3.3529524546	2.0559007326	LOB domain containing protein	AT3G02550 (AtLBD41 )
Heat shock
	HORVU3Hr1G020490	3.0731918182	1.6648287139	SHSP domain containing protein	AT5G12020 (AtHSP17.6II)
	HORVU6Hr1G077710	2.5419729784	1.4505126166	SHSP domain containing protein	no
	HORVU3Hr1G071120	2.6168955572	1.4883608707	Clp R domain containing protein	AT1G74310 (AtHSP101)
Others
	HORVU2Hr1G078510	2.7123945767	1.5823426622	Uncharacterized protein	AT1G17420 (AtLOX3)
	HORVU6Hr1G029750	2.3329797695	1.3397488707	Predicted protein	AT2G23970 (AtGGP5)
	HORVU5Hr1G053700	2.6559570812	1.5347020265	Predicted protein	AT1G75670 ( AtNRPA7)
	HORVU2Hr1G116830	5.4564712787	3.4630286258	Uncharacterized protein	no
	HORVU7Hr1G093050	3.6354424205	1.8160253505	Uncharacterized protein	no
	HORVU5Hr1G080820	3.1667462704	1.3629117817	Uncharacterized protein	no
	HORVU3Hr1G083740	3.0733504116	1.4360475935	Uncharacterized protein	no
	HORVU5Hr1G097930	2.9940493852	1.726613976	Uncharacterized protein	no
	HORVU7Hr1G093080	2.706160671	1.0725797725	Uncharacterized protein	no
	HORVU2Hr1G061850	2.4957976365	1.103154283	Uncharacterized protein	no
	HORVU6Hr1G025830	2.3604484857	1.2484362965	Predicted protein	no
	HORVU3Hr1G061080	2.4692387292	0.93970442127	Predicted protein	no

## Sheet: Cluster L4
Category	Gene ID	Log2FC H2O2 vs. control	Log2FC leaf LaCl3+H2O2 vs. control	Functional annotation	Predicted ortholog in A. thaliana
TFs
	HORVU5Hr1G080300	-4.5561333887	-3.3645859603	CBF1-like protein BCBF1	no
	HORVU7Hr1G072670	-3.9569545583	-2.5351990137	NAC domain containing protein	no
	HORVU3Hr1G010190	-3.3161753518	-1.8531700258	Uncharacterized protein	AT1G68840 (AtRAV2)
Others
	HORVU1Hr1G063780	-3.1787139842	-1.5564843765	Fe2OG dioxygenase domain containing protein	AT5G51810 (AtGA20ox2)
	HORVU5Hr1G011730	-2.4449656138	-1.037481638	RING-type domain containing protein	no
	HORVU3Hr1G105300	-2.1572394175	-0.96292454891	Uncharacterized protein	AT3G57260 (AtBG2)
	HORVU1Hr1G072890	-4.1595437469	-2.9415093361	Uncharacterized protein	no
	HORVU5Hr1G110090	-3.7279256178	-1.6702892749	Uncharacterized protein	no
	HORVU3Hr1G068410	-2.6144281529	-1.4706777975	Uncharacterized protein	no
	HORVU2Hr1G022540	-2.4781860275	-1.2200972906	Uncharacterized protein	no

## Sheet: Cluster L5 
Category	Gene ID	Log2FC H2O2 vs. control	Log2FC leaf LaCl3+H2O2 vs. control	Functional annotation	Predicted ortholog in A. thaliana
TFs
	HORVU6Hr1G035470	-1.0486071738	-2.0829473273	Uncharacterized protein	AT5G67300 (AtMYBR1)
	HORVU2Hr1G077180	-1.7508269623	-2.9638673302	AP2/ERF domain-containing protein	no
Others
	HORVU3Hr1G022260	-1.2302349793	-2.3274072086	Uncharacterized protein	AT3G62160
	HORVU5Hr1G108670	1.383871352	-0.9995988278	Galectin domain containing protein	AT1G74800 (AtGALT5)
	HORVU7Hr1G052500	1.2763296649	-0.89471977553	Uncharacterized protein	AT4G25850 (AtORP4B)
	HORVU0Hr1G002410	1.523944079	-1.3211493183	zinc_ribbon_12 domain-containing protein	no
	HORVU6Hr1G028220	1.386824808	-1.0811442642	Uncharacterized protein	AT3G46710 (AtRPP13L2)
	HORVU2Hr1G002320	1.4392745932	-1.6325941324	Uncharacterized protein	no
	HORVU2Hr1G094780	2.7271402716	-1.4564584786	Uncharacterized protein	no
	HORVU7Hr1G041260	2.0400707629	-0.82692903941	Uncharacterized protein	no
