# Supplementary material for: Ca2+-dependent H2O2 response in roots and leaves of barley - a transcriptomic investigation
Source: BMC Plant Biol. 2025 Feb 20;25:232. doi: 10.1186/s12870-025-06248-9 (PMC11841189; doi:10.1186/s12870-025-06248-9)
Supplement: Supplementary file 5 — Supplementary Material 5: Additional File 5: Table S3 A comparison of the obtained unique genes in Leaf H2O2+LaCl3 (Table S2) to leaf H2O2-DEGs obtained in our former study (Bhattacharyya et al 2023). For the shared genes between both treatments a selection based on a log2FC difference (delta log2FC) was performed and only genes showing a delta >1 was considered for further analyses. A clustering of the obtained genes resulted in a total of five clusters. control: ddH2O; UCs: genes with unchanged expression vs control [file 12870_2025_6248_MOESM5_ESM.xlsx]

## Sheet: Full comparison
	Gene ID	Log2FC H2O2 vs. control	Log2FC LaCl3+H2O2 vs. control
DEGS vs DEGs
	HORVU1Hr1G082310	1.29579	-1.81027
	HORVU5Hr1G068450	1.60648	-1.71331
	HORVU5Hr1G080420	1.51327	-2.02281
	HORVU5Hr1G080450	1.93638	-2.06937
	HORVU5Hr1G080790	1.27853	-1.08137
	HORVU6Hr1G065430	1.23842	-1.1747
	HORVU1Hr1G016420	1.9643	-0.905087
	HORVU1Hr1G074260	1.05619	-1.17017
	HORVU1Hr1G079030	1.82642	-1.62949
	HORVU3Hr1G025030	2.51956	-1.7534
	HORVU3Hr1G056980	2.30655	-2.12868
	HORVU5Hr1G034830	1.5409	-1.69152
	HORVU5Hr1G056130	1.18571	-1.33443
	HORVU7Hr1G113830	1.19855	-1.38116
	HORVU7Hr1G113850	1.10739	-1.37954
	HORVU1Hr1G029180	1.63121	-1.06653
	HORVU5Hr1G118060	2.0981	-2.0872
	HORVU2Hr1G066080	1.42297	-1.28009
	HORVU3Hr1G016320	1.5771	-1.82348
	HORVU2Hr1G066100	1.50001	-1.22594
	HORVU3Hr1G000150	1.26155	-1.26364
	HORVU5Hr1G093960	1.56572	-1.11012
	HORVU3Hr1G004920	1.87987	-2.03813
	HORVU3Hr1G076670	1.60808	-1.1909
	HORVU4Hr1G028720	2.70723	-1.7676
	HORVU7Hr1G098440	1.48186	-1.29911
	HORVU6Hr1G013670	1.37968	-1.0365
	HORVU6Hr1G050750	1.54012	-1.22752
	HORVU3Hr1G038290	2.28484	-1.04185
	HORVU7Hr1G039570	2.21914	-1.39316
	HORVU4Hr1G076850	1.16746	-1.84623
	HORVU5Hr1G062290	1.36511	-1.10989
	HORVU7Hr1G041230	1.55923	-1.8245
	HORVU5Hr1G042030	1.32671	-1.35627
	HORVU0Hr1G016780	1.44284	-1.33275
	HORVU3Hr1G056100	2.11623	-1.86166
	HORVU1Hr1G057410	1.09248	-1.07704
	HORVU1Hr1G078710	1.58036	-1.12717
	HORVU1Hr1G078860	1.72655	-1.75205
	HORVU3Hr1G065610	1.34513	-1.53352
	HORVU3Hr1G065630	1.24971	-1.46059
	HORVU1Hr1G088510	1.41726	-2.29259
	HORVU1Hr1G070840	1.99046	-2.2143
	HORVU1Hr1G019770	1.85286	-1.71224
	HORVU5Hr1G011940	1.371	-1.39762
	HORVU4Hr1G008870	1.08082	-1.01566
	HORVU3Hr1G019430	1.04493	-1.09729
	HORVU4Hr1G078400	1.06215	-1.0999
	HORVU4Hr1G075410	1.16717	-1.00657
	HORVU4Hr1G056770	1.03498	-1.2553
	HORVU2Hr1G087010	1.28356	-1.01107
	HORVU3Hr1G108630	1.19819	-1.12642
	HORVU3Hr1G058810	1.34916	-1.00091
	HORVU3Hr1G019440	1.1896	-1.18324
	HORVU7Hr1G089240	1.03976	-1.3306
	HORVU5Hr1G108610	1.29455	-1.10304
	HORVU5Hr1G084700	1.00518	-1.40637
	HORVU2Hr1G084640	1.27355	-1.193
	HORVU7Hr1G039180	1.23071	-1.28108
	HORVU6Hr1G077750	1.20121	-1.34309
	HORVU5Hr1G073970	1.37024	-1.21702
	HORVU5Hr1G009350	1.27971	-1.31517
	HORVU7Hr1G105620	1.20003	-1.42688
	HORVU0Hr1G017160	1.39669	-1.25138
	HORVU1Hr1G060530	1.43364	-1.28131
	HORVU1Hr1G055470	1.5207	-1.18173
	HORVU7Hr1G093080	1.34661	-1.38495
	HORVU5Hr1G072760	1.02502	-1.65313
	HORVU0Hr1G032410	1.29493	-1.51831
	HORVU6Hr1G059500	1.28419	-1.56936
	HORVU2Hr1G105090	1.72536	-1.67851
	HORVU2Hr1G105140	1.48458	-1.39514
	HORVU1Hr1G094490	1.1706	-1.68272
	HORVU6Hr1G025830	1.3098	-1.58225
	HORVU2Hr1G094230	1.27387	-1.62419
	HORVU7Hr1G053260	1.48193	-1.45544
	HORVU4Hr1G003590	1.29407	-1.62962
	HORVU4Hr1G056210	1.53351	-1.41869
	HORVU1Hr1G048700	1.42868	-1.56295
	HORVU4Hr1G072340	1.38833	-1.73652
	HORVU2Hr1G001820	1.28939	-1.90109
	HORVU3Hr1G000690	1.0056	-2.0649
	HORVU7Hr1G099580	1.72293	-1.55363
	HORVU3Hr1G097400	1.58965	-1.69103
	HORVU6Hr1G028220	1.80577	-1.45581
	HORVU6Hr1G077780	1.15035	-2.01785
	HORVU7Hr1G037350	1.67255	-1.64363
	HORVU2Hr1G116800	1.53963	-1.76938
	HORVU7Hr1G106790	1.73494	-1.61436
	HORVU7Hr1G040590	1.71208	-1.64546
	HORVU1Hr1G026850	1.83533	-1.52532
	HORVU5Hr1G098360	1.56395	-1.85494
	HORVU5Hr1G016780	1.35264	-2.10126
	HORVU7Hr1G121570	2.02085	-1.69508
	HORVU2Hr1G093960	1.31011	-2.15338
	HORVU4Hr1G050510	1.91724	-1.75407
	HORVU1Hr1G082470	1.81738	-1.87579
	HORVU2Hr1G038040	1.46828	-2.17915
	HORVU4Hr1G009800	1.55855	-2.16946
	HORVU6Hr1G086770	2.40899	-1.14392
	HORVU3Hr1G097390	1.58036	-2.21553
	HORVU3Hr1G066500	2.18771	-1.8392
	HORVU0Hr1G002390	2.22481	-1.79517
	HORVU1Hr1G047430	2.00497	-2.06599
	HORVU1Hr1G074790	1.77771	-2.25673
	HORVU4Hr1G005810	2.40909	-1.63036
	HORVU3Hr1G097460	2.30276	-1.82662
	HORVU7Hr1G096800	1.9017	-2.30541
	HORVU5Hr1G013590	1.85821	-2.44506
	HORVU5Hr1G080820	1.99682	-2.37271
	HORVU7Hr1G035480	1.7859	-2.55004
	HORVU6Hr1G001150	1.83037	-2.68616
	HORVU2Hr1G094780	2.32591	-2.41267
	HORVU3Hr1G107550	2.70162	-2.06784
	HORVU4Hr1G087760	1.36064	-1.03609
	HORVU2Hr1G029480	1.3562	-0.840481
	HORVU1Hr1G000700	2.66996	-2.44162
	HORVU5Hr1G077670	3.07779	-1.79774
	HORVU3Hr1G011360	2.48085	-2.83011
	HORVU1Hr1G005150	2.25528	-3.31267
	HORVU5Hr1G077650	3.44108	-2.20779
	HORVU5Hr1G013640	3.24719	-2.85374
	HORVU3Hr1G087310	3.22606	-3.32805
	HORVU0Hr1G017000	1.11455	-0.898198
	HORVU1Hr1G093390	1.12267	-0.928364
	HORVU7Hr1G101580	1.26406	-0.92733
	HORVU3Hr1G021190	1.31479	-0.916071
	HORVU2Hr1G116740	1.59867	-0.939001
	HORVU2Hr1G098140	-2.68241	2.73538
	HORVU5Hr1G018720	-2.32491	2.5798
	HORVU0Hr1G001430	-3.03939	1.69677
	HORVU1Hr1G027700	-2.94675	2.06711
	HORVU1Hr1G080300	-3.92656	2.55848
	HORVU1Hr1G088300	-2.34487	1.69153
	HORVU3Hr1G020140	-3.07156	2.46303
	HORVU2Hr1G106190	-3.21651	1.85058
	HORVU1Hr1G008810	-1.15305	1.00807
	HORVU2Hr1G017240	-2.10054	2.00821
	HORVU3Hr1G010620	-1.00946	1.00729
	HORVU7Hr1G003490	-2.43291	2.29817
	HORVU3Hr1G038700	-2.53986	1.44924
	HORVU7Hr1G072670	-1.98104	1.95494
	HORVU3Hr1G095240	-1.493	0.929197
	HORVU5Hr1G059410	-1.0617	0.92117
	HORVU5Hr1G040310	-1.48517	1.56522
	HORVU4Hr1G008980	-1.21259	1.77906
	HORVU4Hr1G027900	-2.70808	2.10267
	HORVU5Hr1G020900	-2.45063	1.73882
	HORVU2Hr1G108480	-1.3004	1.3885
	HORVU3Hr1G018680	-2.05798	1.83346
	HORVU6Hr1G068980	-2.68995	2.33961
	HORVU7Hr1G084240	-3.00824	2.21528
	HORVU3Hr1G084360	-2.68896	2.51406
	HORVU7Hr1G036130	-1.4296	1.8682
	HORVU3Hr1G058150	-2.36656	1.49996
	HORVU3Hr1G072260	-1.66592	1.42093
	HORVU1Hr1G069830	-3.99892	3.31265
	HORVU7Hr1G098370	-1.55213	3.31887
	HORVU1Hr1G051020	-1.44328	1.24299
	HORVU3Hr1G091360	-2.57515	2.18069
	HORVU4Hr1G068960	-1.3926	1.26388
	HORVU2Hr1G044450	-2.36145	2.00126
	HORVU3Hr1G117390	-3.72796	3.44898
	HORVU1Hr1G021140	-1.36118	0.731162
	HORVU1Hr1G021160	-2.11738	1.94024
	HORVU1Hr1G049100	-3.54444	2.95313
	HORVU2Hr1G124320	-2.08851	2.06644
	HORVU5Hr1G103430	-3.05604	1.928
	HORVU7Hr1G008830	-2.66344	2.10259
	HORVU0Hr1G022350	-4.09263	2.24627
	HORVU6Hr1G091840	-3.01229	3.66943
	HORVU2Hr1G068090	-2.93426	1.65068
	HORVU3Hr1G097770	-1.50283	2.32001
	HORVU3Hr1G114920	-2.11797	1.63362
	HORVU4Hr1G046610	-1.92365	1.39604
	HORVU4Hr1G085090	-1.91634	1.3198
	HORVU6Hr1G009000	-1.79518	2.66578
	HORVU7Hr1G100230	-1.07148	1.37248
	HORVU2Hr1G118080	-2.18873	2.39215
	HORVU2Hr1G029270	-2.0896	1.67146
	HORVU4Hr1G015170	-3.21943	2.72771
	HORVU4Hr1G060760	-2.8861	2.65554
	HORVU3Hr1G020520	-2.96842	2.3405
	HORVU3Hr1G020490	-2.79792	2.47887
	HORVU2Hr1G077710	-1.5918	2.32007
	HORVU4Hr1G063350	-1.77968	2.05329
	HORVU7Hr1G036470	-1.46228	1.07874
	HORVU7Hr1G036540	-2.06959	1.47373
	HORVU4Hr1G056070	-1.75043	2.19789
	HORVU2Hr1G005170	-3.08384	3.23756
	HORVU3Hr1G071120	-1.83887	1.35628
	HORVU4Hr1G060720	-1.34108	1.48864
	HORVU4Hr1G067430	-2.7388	2.86173
	HORVU4Hr1G057170	-1.31063	1.2503
	HORVU1Hr1G020800	-2.63843	2.87821
	HORVU2Hr1G113070	-3.18265	2.24123
	HORVU4Hr1G022270	-1.9767	1.90324
	HORVU4Hr1G022280	-2.15683	1.77472
	HORVU6Hr1G008640	-2.55828	2.53592
	HORVU2Hr1G036960	-1.62443	1.19388
	HORVU2Hr1G040780	-2.42063	1.50418
	HORVU2Hr1G079920	-1.95508	1.30955
	HORVU4Hr1G015260	-1.04733	1.16048
	HORVU5Hr1G082420	-2.12593	1.70908
	HORVU5Hr1G051010	-1.53	1.55342
	HORVU5Hr1G050990	-1.5341	1.7469
	HORVU6Hr1G085170	-1.78033	1.80797
	HORVU2Hr1G073370	-2.20401	1.3924
	HORVU2Hr1G057700	-2.28671	2.1691
	HORVU5Hr1G100140	-2.07055	1.41963
	HORVU2Hr1G041610	-1.69883	1.69158
	HORVU7Hr1G000900	-1.42355	1.39291
	HORVU5Hr1G063620	-2.93882	2.71928
	HORVU5Hr1G122950	-4.60676	3.22968
	HORVU7Hr1G019400	-2.85482	2.16978
	HORVU7Hr1G019390	-2.87381	2.00693
	HORVU2Hr1G110230	-2.37241	2.496
	HORVU3Hr1G007590	-1.55453	1.77153
	HORVU7Hr1G050240	-1.91515	1.38458
	HORVU6Hr1G001160	-1.24387	1.90097
	HORVU7Hr1G091520	-1.91866	1.05483
	HORVU6Hr1G038700	-1.54141	1.33505
	HORVU3Hr1G099770	-1.37966	1.57364
	HORVU2Hr1G107760	-1.31971	1.61442
	HORVU7Hr1G033170	-1.57367	1.35561
	HORVU4Hr1G026160	-1.34894	1.41296
	HORVU4Hr1G082140	-1.29386	1.07854
	HORVU3Hr1G038000	-1.39445	0.968925
	HORVU1Hr1G083370	-1.02796	0.997536
	HORVU7Hr1G094240	-1.15547	0.789618
	HORVU7Hr1G049580	-2.37128	2.12781
	HORVU6Hr1G058290	-2.45065	1.79632
	HORVU7Hr1G029750	-1.53167	1.57484
	HORVU1Hr1G092250	-2.28608	3.21931
	HORVU2Hr1G044510	-1.07682	1.08108
	HORVU3Hr1G113210	-2.07203	1.92913
	HORVU7Hr1G099320	-1.19629	1.30576
	HORVU4Hr1G062440	-1.82769	1.50084
	HORVU7Hr1G107400	-2.34738	1.94546
	HORVU2Hr1G018190	-1.878	1.34082
	HORVU1Hr1G028920	-1.64713	1.57397
	HORVU7Hr1G054710	-2.54648	1.91518
	HORVU6Hr1G089540	-2.0192	1.55804
	HORVU7Hr1G030160	-1.07629	1.05278
	HORVU3Hr1G024210	-1.56868	2.073
	HORVU7Hr1G014870	-1.54179	1.79257
	HORVU5Hr1G110220	-3.63888	3.01579
	HORVU2Hr1G045480	-2.53519	1.79047
	HORVU2Hr1G078840	-1.33099	1.1889
	HORVU5Hr1G001180	-1.44027	3.18561
	HORVU1Hr1G001950	-1.53096	0.913591
	HORVU4Hr1G050120	-5.23297	3.72947
	HORVU6Hr1G087220	-5.12436	3.59729
	HORVU3Hr1G016900	-4.36489	2.25582
	HORVU6Hr1G056570	-3.53791	3.64015
	HORVU2Hr1G102100	-3.46201	3.70146
	HORVU2Hr1G102110	-3.18593	3.19007
	HORVU7Hr1G026570	-3.39074	2.85187
	HORVU4Hr1G087800	-3.02442	3.09917
	HORVU5Hr1G104680	-3.06201	1.52511
	HORVU4Hr1G087780	-1.94493	2.45768
	HORVU2Hr1G102050	-1.8465	1.97539
	HORVU0Hr1G016430	-1.60156	1.10548
	HORVU3Hr1G093350	-3.78321	3.2894
	HORVU2Hr1G026820	-3.72557	3.27368
	HORVU7Hr1G054530	-3.11014	3.7714
	HORVU5Hr1G021610	-3.69364	3.22368
	HORVU6Hr1G071920	-2.13546	4.1404
	HORVU6Hr1G074060	-3.92471	2.53834
	HORVU1Hr1G089730	-3.4892	3.22834
	HORVU3Hr1G024660	-3.9695	2.2977
	HORVU2Hr1G017420	-2.26471	3.88784
	HORVU5Hr1G117830	-3.46791	3.00406
	HORVU7Hr1G083530	-3.62031	2.70679
	HORVU3Hr1G016890	-3.88925	1.83768
	HORVU2Hr1G099470	-3.06244	3.32208
	HORVU1Hr1G088620	-3.09833	3.19625
	HORVU0Hr1G009390	-3.56414	2.44772
	HORVU1Hr1G092630	-3.50055	2.57284
	HORVU4Hr1G010940	-3.7265	1.99343
	HORVU4Hr1G087840	-3.63127	2.17151
	HORVU1Hr1G093760	-3.24555	2.86798
	HORVU7Hr1G098220	-1.2212	1.86569
	HORVU1Hr1G063390	-1.44728	1.56701
	HORVU3Hr1G003860	-2.91104	3.19252
	HORVU0Hr1G000840	-3.48542	2.30292
	HORVU2Hr1G007570	-3.47012	2.33462
	HORVU7Hr1G091080	-2.65219	3.2296
	HORVU5Hr1G104800	-3.38164	2.30198
	HORVU4Hr1G007190	-3.43591	2.15552
	HORVU3Hr1G080500	-2.5445	3.22397
	HORVU3Hr1G078380	-2.87019	2.93389
	HORVU0Hr1G018970	-3.16898	2.45953
	HORVU2Hr1G078570	-2.59572	2.99942
	HORVU3Hr1G093270	-1.79292	3.39608
	HORVU1Hr1G092290	-2.46705	3.07765
	HORVU7Hr1G013170	-3.00395	2.56473
	HORVU7Hr1G044160	-3.07587	2.46062
	HORVU4Hr1G018100	-2.66733	2.91993
	HORVU6Hr1G067920	-2.4991	3.02728
	HORVU5Hr1G047150	-3.20703	2.10849
	HORVU6Hr1G034730	-3.12872	2.23758
	HORVU3Hr1G006450	-2.70289	2.79155
	HORVU0Hr1G002480	-3.14435	2.15214
	HORVU6Hr1G095380	-2.71959	2.65805
	HORVU5Hr1G027980	-2.53832	2.78345
	HORVU1Hr1G085260	-2.90346	2.37615
	HORVU6Hr1G075270	-3.18649	1.83105
	HORVU3Hr1G117650	-1.77197	3.1956
	HORVU2Hr1G104080	-2.42173	2.84264
	HORVU4Hr1G014590	-2.36285	2.80285
	HORVU6Hr1G081570	-2.93653	2.14683
	HORVU1Hr1G090890	-2.72293	2.42962
	HORVU3Hr1G035680	-3.07979	1.60097
	HORVU7Hr1G107210	-3.13591	1.35752
	HORVU2Hr1G021920	-2.22717	2.73471
	HORVU1Hr1G079290	-2.31913	2.656
	HORVU3Hr1G091800	-2.27488	2.63781
	HORVU3Hr1G059030	-1.91901	2.84027
	HORVU5Hr1G066260	-3.02228	1.3779
	HORVU4Hr1G015670	-2.77161	1.9598
	HORVU5Hr1G119550	-1.93674	2.76739
	HORVU3Hr1G084210	-2.2457	2.52162
	HORVU2Hr1G117940	-2.61419	2.12155
	HORVU1Hr1G005280	-2.24851	2.49898
	HORVU1Hr1G022660	-2.40855	2.33769
	HORVU3Hr1G068140	-2.49798	2.2328
	HORVU6Hr1G059930	-2.5005	2.20339
	HORVU1Hr1G019380	-2.71594	1.87118
	HORVU7Hr1G090560	-2.54221	2.08997
	HORVU6Hr1G036800	-2.3851	2.27512
	HORVU3Hr1G032440	-2.49157	2.14947
	HORVU4Hr1G008550	-2.5043	2.11965
	HORVU7Hr1G035400	-2.56415	2.03485
	HORVU5Hr1G034340	-2.04633	2.54351
	HORVU7Hr1G108830	-2.38077	2.24768
	HORVU6Hr1G031700	-2.66579	1.82663
	HORVU4Hr1G016190	-2.47316	2.10919
	HORVU7Hr1G008820	-2.56317	1.98201
	HORVU6Hr1G063480	-2.70122	1.69056
	HORVU3Hr1G095700	-1.49827	2.75596
	HORVU3Hr1G088190	-1.57147	2.71721
	HORVU4Hr1G002600	-2.32439	2.17817
	HORVU3Hr1G092520	-2.54999	1.87823
	HORVU2Hr1G022160	-2.29789	2.2047
	HORVU5Hr1G081610	-2.47725	1.92358
	HORVU1Hr1G046630	-2.64644	1.62236
	HORVU7Hr1G043690	-2.59612	1.70324
	HORVU1Hr1G065600	-2.12108	2.2899
	HORVU0Hr1G013900	-2.26623	2.13121
	HORVU7Hr1G088670	-2.52005	1.78788
	HORVU5Hr1G094490	-1.72932	2.53733
	HORVU7Hr1G088510	-1.77823	2.50451
	HORVU0Hr1G005160	-2.69975	1.36989
	HORVU3Hr1G026890	-2.32175	2.02456
	HORVU7Hr1G093210	-2.17445	2.17146
	HORVU4Hr1G083070	-2.4374	1.84827
	HORVU2Hr1G105930	-2.31491	1.99277
	HORVU6Hr1G077120	-2.39411	1.87416
	HORVU0Hr1G022270	-1.59633	1.06954
	HORVU3Hr1G091480	-1.69317	1.33298
	HORVU5Hr1G079910	-2.14675	1.87734
	HORVU7Hr1G040480	-2.32658	1.95973
	HORVU1Hr1G002170	-1.85189	2.40049
	HORVU2Hr1G065120	-2.40267	1.84295
	HORVU3Hr1G108950	-2.20811	2.06561
	HORVU6Hr1G084310	-2.13078	2.13451
	HORVU4Hr1G019570	-1.91584	2.29194
	HORVU3Hr1G085460	-2.58377	1.41416
	HORVU4Hr1G016010	-2.22868	1.94601
	HORVU5Hr1G069090	-2.19824	1.96699
	HORVU7Hr1G107310	-2.03875	2.11782
	HORVU3Hr1G080440	-2.34718	1.74483
	HORVU4Hr1G043650	-1.97923	2.163
	HORVU3Hr1G004140	-1.65511	2.34237
	HORVU4Hr1G082700	-2.29733	1.70835
	HORVU4Hr1G088860	-2.04598	2.01515
	HORVU2Hr1G040680	-1.9137	2.09514
	HORVU3Hr1G069730	-2.03532	1.97705
	HORVU3Hr1G034980	-2.02129	1.98094
	HORVU2Hr1G007070	-1.9552	2.02106
	HORVU5Hr1G000520	-2.22846	1.66823
	HORVU1Hr1G083920	-2.16651	1.73116
	HORVU7Hr1G007540	-2.23366	1.62292
	HORVU3Hr1G110440	-1.76707	2.11266
	HORVU2Hr1G122470	-1.63807	2.19656
	HORVU3Hr1G037780	-1.93821	1.93654
	HORVU2Hr1G087090	-1.9355	1.89676
	HORVU0Hr1G008950	-2.31402	1.3368
	HORVU7Hr1G015740	-1.83709	1.9702
	HORVU7Hr1G040860	-2.29713	1.36046
	HORVU1Hr1G069800	-2.2875	1.37813
	HORVU3Hr1G109160	-2.09402	1.66983
	HORVU0Hr1G016130	-1.81981	1.95191
	HORVU3Hr1G082460	-1.66183	2.07991
	HORVU5Hr1G087980	-2.04919	1.66425
	HORVU4Hr1G085590	-1.89347	1.84488
	HORVU1Hr1G028900	-2.22552	1.36896
	HORVU5Hr1G111280	-1.99015	1.70161
	HORVU7Hr1G106960	-1.79712	1.87932
	HORVU3Hr1G074100	-1.79891	1.87053
	HORVU2Hr1G118100	-1.61524	2.02269
	HORVU7Hr1G115810	-1.75492	1.87351
	HORVU1Hr1G057680	-1.71866	1.89097
	HORVU5Hr1G074030	-2.29096	1.07287
	HORVU4Hr1G000950	-2.08893	1.45006
	HORVU3Hr1G019720	-1.98509	1.59119
	HORVU1Hr1G018350	-1.81504	1.77749
	HORVU6Hr1G088580	-2.0678	1.4507
	HORVU1Hr1G086910	-2.28252	1.03189
	HORVU6Hr1G019870	-1.84378	1.72772
	HORVU2Hr1G014150	-1.89699	1.66567
	HORVU6Hr1G075900	-1.64766	1.90515
	HORVU6Hr1G015770	-2.02827	1.4848
	HORVU2Hr1G085270	-1.68404	1.84764
	HORVU3Hr1G001060	-1.78916	1.73662
	HORVU3Hr1G077890	-1.71472	1.80356
	HORVU1Hr1G048950	-1.66055	1.8486
	HORVU5Hr1G008180	-1.68819	1.80497
	HORVU0Hr1G010810	-1.9635	1.48474
	HORVU7Hr1G007800	-1.58799	1.87217
	HORVU7Hr1G042120	-1.82788	1.61806
	HORVU2Hr1G019820	-1.89412	1.53129
	HORVU7Hr1G106420	-1.71488	1.72432
	HORVU3Hr1G117570	-1.28158	2.04131
	HORVU2Hr1G017270	-1.67276	1.72539
	HORVU2Hr1G083700	-1.84549	1.53502
	HORVU3Hr1G023780	-2.11088	1.09586
	HORVU3Hr1G026920	-1.51068	1.84567
	HORVU1Hr1G094710	-1.28946	1.9902
	HORVU5Hr1G109710	-1.82962	1.48507
	HORVU4Hr1G000620	-1.54835	1.77692
	HORVU0Hr1G003850	-1.74971	1.56172
	HORVU7Hr1G091250	-1.5798	1.7266
	HORVU5Hr1G097150	-1.91953	1.2672
	HORVU1Hr1G079280	-1.68499	1.55559
	HORVU7Hr1G086010	-1.56763	1.65847
	HORVU4Hr1G084930	-1.76365	1.44405
	HORVU1Hr1G076800	-1.66116	1.54429
	HORVU4Hr1G000850	-1.83386	1.32216
	HORVU3Hr1G082030	-1.74919	1.42748
	HORVU3Hr1G113620	-1.18051	1.89192
	HORVU3Hr1G013270	-1.61729	1.53873
	HORVU3Hr1G067760	-1.60832	1.5371
	HORVU0Hr1G015890	-1.70838	1.40195
	HORVU7Hr1G113290	-1.43194	1.66017
	HORVU7Hr1G002110	-1.5839	1.4985
	HORVU6Hr1G029540	-1.92338	1.01547
	HORVU6Hr1G020380	-1.31958	1.72494
	HORVU2Hr1G006690	-1.70807	1.31074
	HORVU2Hr1G083680	-1.8394	1.07738
	HORVU2Hr1G019270	-1.62494	1.37074
	HORVU1Hr1G089830	-1.50203	1.49966
	HORVU6Hr1G088960	-1.35054	1.63298
	HORVU0Hr1G001490	-1.55081	1.44366
	HORVU2Hr1G119110	-1.36006	1.60362
	HORVU2Hr1G099410	-1.89403	0.868804
	HORVU5Hr1G122060	-1.45951	1.48137
	HORVU5Hr1G112610	-1.28126	1.62382
	HORVU2Hr1G121060	-1.80831	0.994752
	HORVU1Hr1G037270	-1.24114	1.63207
	HORVU5Hr1G113900	-1.6313	1.23215
	HORVU5Hr1G069110	-1.68881	1.13999
	HORVU6Hr1G064770	-1.38493	1.48725
	HORVU7Hr1G042160	-1.40116	1.45303
	HORVU7Hr1G087700	-1.64961	1.15608
	HORVU2Hr1G078790	-1.52365	1.28948
	HORVU3Hr1G020800	-1.41476	1.40553
	HORVU5Hr1G059310	-1.41291	1.40624
	HORVU4Hr1G054210	-1.55038	1.24564
	HORVU3Hr1G105420	-1.42063	1.38584
	HORVU5Hr1G111850	-1.59899	1.16761
	HORVU5Hr1G041030	-1.67022	1.04979
	HORVU4Hr1G073730	-1.39798	1.37278
	HORVU7Hr1G027810	-1.17005	1.56824
	HORVU1Hr1G085480	-1.52088	1.2157
	HORVU5Hr1G112440	-1.64002	1.04423
	HORVU7Hr1G082710	-1.32704	1.41278
	HORVU2Hr1G065330	-1.1767	1.53291
	HORVU5Hr1G111290	-1.24396	1.47457
	HORVU2Hr1G116090	-1.45753	1.24079
	HORVU5Hr1G030460	-1.52137	1.15556
	HORVU4Hr1G077850	-1.1647	1.51092
	HORVU2Hr1G030130	-1.52768	1.14237
	HORVU7Hr1G078670	-1.16659	1.50102
	HORVU3Hr1G090350	-1.20993	1.4532
	HORVU5Hr1G042740	-1.18791	1.4597
	HORVU6Hr1G031640	-1.5334	1.06483
	HORVU4Hr1G085970	-1.49249	1.1142
	HORVU5Hr1G018830	-1.41583	1.20552
	HORVU3Hr1G047220	-1.25465	1.28835
	HORVU5Hr1G048300	-1.36255	1.13813
	HORVU3Hr1G028810	-1.4385	1.02246
	HORVU2Hr1G030610	-1.4033	1.06029
	HORVU0Hr1G000780	-1.3506	1.12356
	HORVU5Hr1G081820	-1.39709	1.06377
	HORVU3Hr1G015540	-1.29746	1.17616
	HORVU4Hr1G088340	-1.25306	1.208
	HORVU2Hr1G081460	-1.3836	1.05021
	HORVU2Hr1G016440	-1.26431	1.15091
	HORVU5Hr1G073680	-1.00681	1.3834
	HORVU3Hr1G081860	-1.17333	1.18002
	HORVU3Hr1G112010	-1.03438	1.29734
	HORVU3Hr1G015740	-1.11089	1.23028
	HORVU6Hr1G057170	-1.15026	1.17252
	HORVU5Hr1G006280	-1.07038	1.20972
	HORVU4Hr1G078950	-1.17197	1.09256
	HORVU7Hr1G027480	-1.01195	1.03648
	HORVU7Hr1G088430	-1.55437	0.975401
	HORVU3Hr1G084220	-1.57811	0.743897
	HORVU1Hr1G047390	-1.49427	0.716396
	HORVU1Hr1G072720	-1.36144	0.85706
	HORVU1Hr1G018360	-1.27574	0.890603
	HORVU5Hr1G078950	-1.16485	0.978501
	HORVU1Hr1G017460	-1.19565	0.941149
	HORVU1Hr1G017480	-1.14498	0.889399
	HORVU2Hr1G032970	-1.0624	0.973238
	HORVU3Hr1G059700	-1.08958	0.881109
	HORVU2Hr1G021350	-1.01664	0.938383
	HORVU3Hr1G045890	-1.05408	0.735111
	HORVU3Hr1G001450	-1.00766	0.788156
	HORVU2Hr1G083170	-1.02635	0.730479
DEGS vs UC
	HORVU2Hr1G097850	2.7667	UC
	HORVU4Hr1G071890	1.13019	UC
	HORVU1Hr1G090190	2.02451	UC
	HORVU3Hr1G050590	1.65273	UC
	HORVU2Hr1G027600	1.63745	UC
	HORVU7Hr1G116750	1.58688	UC
	HORVU3Hr1G065880	1.37317	UC
	HORVU2Hr1G020140	1.31979	UC
	HORVU6Hr1G007010	1.27932	UC
	HORVU3Hr1G016940	1.22298	UC
	HORVU7Hr1G070730	1.15155	UC
	HORVU4Hr1G049960	2.71969	UC
	HORVU4Hr1G051350	2.63756	UC
	HORVU2Hr1G093380	1.94564	UC
	HORVU6Hr1G065900	1.77379	UC
	HORVU5Hr1G059160	3.0879	UC
	HORVU5Hr1G018100	2.29643	UC
	HORVU4Hr1G003340	1.92444	UC
	HORVU4Hr1G075180	1.57597	UC
	HORVU5Hr1G014320	1.61297	UC
	HORVU5Hr1G023880	1.01189	UC
	HORVU4Hr1G088280	1.32356	UC
	HORVU2Hr1G040910	2.30277	UC
	HORVU5Hr1G119680	3.50689	UC
	HORVU4Hr1G072440	1.95098	UC
	HORVU5Hr1G119670	3.4742	UC
	HORVU2Hr1G097490	3.26925	UC
	HORVU3Hr1G034080	4.00077	UC
	HORVU1Hr1G054210	1.02175	UC
	HORVU4Hr1G072660	2.60508	UC
	HORVU7Hr1G002440	2.23341	UC
	HORVU2Hr1G111030	2.11857	UC
	HORVU3Hr1G016820	2.04035	UC
	HORVU7Hr1G081740	1.92293	UC
	HORVU7Hr1G098390	1.84169	UC
	HORVU3Hr1G016800	1.44222	UC
	HORVU5Hr1G118270	1.43266	UC
	HORVU2Hr1G036980	1.44732	UC
	HORVU2Hr1G120100	1.47094	UC
	HORVU5Hr1G114540	1.01502	UC
	HORVU5Hr1G010860	1.46835	UC
	HORVU3Hr1G116470	2.07264	UC
	HORVU2Hr1G076100	1.05515	UC
	HORVU7Hr1G100570	1.58956	UC
	HORVU4Hr1G078380	1.99309	UC
	HORVU4Hr1G011690	2.26919	UC
	HORVU1Hr1G072500	1.21409	UC
	HORVU7Hr1G072610	1.03774	UC
	HORVU1Hr1G081270	4.80066	UC
	HORVU7Hr1G026070	4.54195	UC
	HORVU7Hr1G039550	3.97952	UC
	HORVU2Hr1G026640	3.6585	UC
	HORVU7Hr1G010280	3.59683	UC
	HORVU7Hr1G091390	3.51402	UC
	HORVU1Hr1G066580	3.15645	UC
	HORVU1Hr1G066540	3.1025	UC
	HORVU4Hr1G064950	3.08124	UC
	HORVU1Hr1G016730	2.96966	UC
	HORVU2Hr1G018550	2.91647	UC
	HORVU2Hr1G026380	2.82997	UC
	HORVU2Hr1G064330	2.81815	UC
	HORVU7Hr1G039590	2.74585	UC
	HORVU2Hr1G018530	2.60547	UC
	HORVU7Hr1G093400	2.27781	UC
	HORVU1Hr1G069000	2.27116	UC
	HORVU0Hr1G002840	2.17324	UC
	HORVU2Hr1G064390	2.14144	UC
	HORVU2Hr1G100610	2.07848	UC
	HORVU2Hr1G051250	2.00228	UC
	HORVU5Hr1G097130	1.88195	UC
	HORVU2Hr1G026520	1.84197	UC
	HORVU6Hr1G026600	1.67994	UC
	HORVU7Hr1G098110	1.37663	UC
	HORVU7Hr1G045600	1.36575	UC
	HORVU1Hr1G054640	1.36213	UC
	HORVU1Hr1G066600	2.6641	UC
	HORVU7Hr1G108210	2.0825	UC
	HORVU2Hr1G026590	1.93038	UC
	HORVU2Hr1G092980	1.80755	UC
	HORVU5Hr1G044710	2.7694	UC
	HORVU1Hr1G072140	1.05833	UC
	HORVU6Hr1G094990	2.14694	UC
	HORVU1Hr1G090940	2.38662	UC
	HORVU7Hr1G002130	2.75673	UC
	HORVU1Hr1G069510	2.74903	UC
	HORVU7Hr1G047570	2.5611	UC
	HORVU2Hr1G080770	2.17042	UC
	HORVU5Hr1G046020	1.99592	UC
	HORVU7Hr1G114400	1.91459	UC
	HORVU5Hr1G071340	1.44489	UC
	HORVU3Hr1G081050	1.3285	UC
	HORVU2Hr1G123200	1.25192	UC
	HORVU1Hr1G049860	1.02729	UC
	HORVU6Hr1G030880	1.01007	UC
	HORVU5Hr1G007340	1.28914	UC
	HORVU7Hr1G111360	1.40449	UC
	HORVU7Hr1G121250	1.09987	UC
	HORVU7Hr1G038270	1.00383	UC
	HORVU3Hr1G079420	3.2758	UC
	HORVU3Hr1G002710	1.27524	UC
	HORVU1Hr1G077520	1.45736	UC
	HORVU6Hr1G095020	2.08717	UC
	HORVU2Hr1G036530	1.65527	UC
	HORVU6Hr1G092430	1.42263	UC
	HORVU1Hr1G091460	1.37359	UC
	HORVU5Hr1G107380	1.03151	UC
	HORVU4Hr1G087670	2.83669	UC
	HORVU6Hr1G083160	1.05866	UC
	HORVU2Hr1G117140	2.54424	UC
	HORVU7Hr1G036060	1.56096	UC
	HORVU5Hr1G076210	2.49496	UC
	HORVU7Hr1G051930	1.13658	UC
	HORVU3Hr1G022840	1.93191	UC
	HORVU7Hr1G094730	3.80635	UC
	HORVU1Hr1G001690	3.67315	UC
	HORVU6Hr1G083350	3.13255	UC
	HORVU1Hr1G082610	3.13217	UC
	HORVU4Hr1G081190	3.08412	UC
	HORVU3Hr1G065810	2.95375	UC
	HORVU1Hr1G065710	2.90672	UC
	HORVU6Hr1G084840	2.8913	UC
	HORVU7Hr1G001960	2.80589	UC
	HORVU7Hr1G120400	2.71661	UC
	HORVU4Hr1G088020	2.67603	UC
	HORVU3Hr1G003650	2.65855	UC
	HORVU3Hr1G072590	2.65004	UC
	HORVU7Hr1G122200	2.52162	UC
	HORVU4Hr1G052970	2.5173	UC
	HORVU1Hr1G001700	2.4764	UC
	HORVU2Hr1G103000	2.46163	UC
	HORVU7Hr1G002050	2.46142	UC
	HORVU3Hr1G098950	2.45808	UC
	HORVU4Hr1G058270	2.4404	UC
	HORVU2Hr1G111090	2.43453	UC
	HORVU2Hr1G044220	2.43082	UC
	HORVU6Hr1G064350	2.39923	UC
	HORVU3Hr1G013470	2.39274	UC
	HORVU7Hr1G096350	2.37964	UC
	HORVU1Hr1G082340	2.36688	UC
	HORVU5Hr1G026030	2.3302	UC
	HORVU6Hr1G083320	2.32554	UC
	HORVU3Hr1G011440	2.31411	UC
	HORVU2Hr1G045020	2.30876	UC
	HORVU5Hr1G074110	2.30736	UC
	HORVU3Hr1G107540	2.30263	UC
	HORVU2Hr1G080240	2.30192	UC
	HORVU2Hr1G081920	2.2963	UC
	HORVU2Hr1G099740	2.27265	UC
	HORVU4Hr1G005140	2.27183	UC
	HORVU3Hr1G018190	2.2704	UC
	HORVU6Hr1G094070	2.26948	UC
	HORVU5Hr1G098260	2.25712	UC
	HORVU2Hr1G113430	2.25524	UC
	HORVU6Hr1G088480	2.23527	UC
	HORVU4Hr1G020580	2.22791	UC
	HORVU0Hr1G009060	2.22564	UC
	HORVU1Hr1G011390	2.22103	UC
	HORVU1Hr1G001680	2.21251	UC
	HORVU4Hr1G089830	2.20427	UC
	HORVU0Hr1G031750	2.19469	UC
	HORVU4Hr1G089770	2.67519	UC
	HORVU7Hr1G109140	1.33042	UC
	HORVU2Hr1G104430	2.12826	UC
	HORVU7Hr1G109020	1.64114	UC
	HORVU4Hr1G079800	1.13535	UC
	HORVU1Hr1G054040	1.53098	UC
	HORVU0Hr1G025250	2.33743	UC
	HORVU2Hr1G025660	2.18018	UC
	HORVU6Hr1G060700	2.17978	UC
	HORVU2Hr1G019770	2.17371	UC
	HORVU3Hr1G059790	2.16423	UC
	HORVU3Hr1G082440	2.16076	UC
	HORVU6Hr1G095330	2.15269	UC
	HORVU2Hr1G082530	2.14802	UC
	HORVU6Hr1G064220	2.13966	UC
	HORVU1Hr1G082410	2.13647	UC
	HORVU2Hr1G028610	2.11185	UC
	HORVU2Hr1G098560	2.10551	UC
	HORVU5Hr1G095010	2.0904	UC
	HORVU2Hr1G110310	2.08161	UC
	HORVU5Hr1G100980	2.07975	UC
	HORVU1Hr1G082460	2.07528	UC
	HORVU2Hr1G003720	2.07149	UC
	HORVU6Hr1G086790	2.06256	UC
	HORVU6Hr1G066750	2.03753	UC
	HORVU7Hr1G089230	2.02138	UC
	HORVU6Hr1G000040	2.01778	UC
	HORVU4Hr1G019890	2.01655	UC
	HORVU6Hr1G005930	1.97707	UC
	HORVU3Hr1G079850	1.96122	UC
	HORVU7Hr1G122730	1.95421	UC
	HORVU7Hr1G057840	1.95103	UC
	HORVU1Hr1G076460	1.93093	UC
	HORVU4Hr1G080100	1.92775	UC
	HORVU6Hr1G038490	1.90896	UC
	HORVU3Hr1G031540	1.90424	UC
	HORVU1Hr1G021070	1.90106	UC
	HORVU1Hr1G062950	1.89142	UC
	HORVU7Hr1G021440	1.87949	UC
	HORVU4Hr1G020640	1.87331	UC
	HORVU7Hr1G043010	1.85864	UC
	HORVU3Hr1G055740	1.85435	UC
	HORVU3Hr1G092310	1.84824	UC
	HORVU7Hr1G119410	1.83442	UC
	HORVU5Hr1G046370	1.81586	UC
	HORVU6Hr1G000540	1.81578	UC
	HORVU5Hr1G028140	1.80277	UC
	HORVU3Hr1G082300	1.79227	UC
	HORVU4Hr1G085890	1.79007	UC
	HORVU4Hr1G036820	1.78981	UC
	HORVU3Hr1G079730	1.78754	UC
	HORVU1Hr1G082370	1.77354	UC
	HORVU1Hr1G057520	1.76476	UC
	HORVU7Hr1G046210	1.7634	UC
	HORVU5Hr1G075390	1.75927	UC
	HORVU4Hr1G066430	1.75836	UC
	HORVU7Hr1G080250	1.75243	UC
	HORVU6Hr1G020120	1.74358	UC
	HORVU1Hr1G082020	1.73768	UC
	HORVU3Hr1G094140	1.71946	UC
	HORVU3Hr1G067130	1.70782	UC
	HORVU2Hr1G078380	1.70289	UC
	HORVU2Hr1G022690	1.68917	UC
	HORVU4Hr1G002160	1.68574	UC
	HORVU2Hr1G024740	1.68491	UC
	HORVU2Hr1G042350	1.67481	UC
	HORVU3Hr1G101930	1.63731	UC
	HORVU2Hr1G095080	1.63174	UC
	HORVU4Hr1G066000	1.63041	UC
	HORVU6Hr1G078990	1.62644	UC
	HORVU1Hr1G010390	1.61395	UC
	HORVU4Hr1G063430	1.61252	UC
	HORVU1Hr1G065070	1.60935	UC
	HORVU1Hr1G052950	1.60413	UC
	HORVU5Hr1G037890	1.60325	UC
	HORVU1Hr1G074820	1.60214	UC
	HORVU3Hr1G109930	1.6	UC
	HORVU4Hr1G083620	1.5993	UC
	HORVU7Hr1G074330	1.59768	UC
	HORVU2Hr1G004200	1.59205	UC
	HORVU7Hr1G121200	1.58768	UC
	HORVU2Hr1G087370	1.58701	UC
	HORVU5Hr1G056470	1.58158	UC
	HORVU6Hr1G019780	1.56496	UC
	HORVU3Hr1G084680	1.56253	UC
	HORVU7Hr1G119150	1.55821	UC
	HORVU2Hr1G022820	1.54351	UC
	HORVU6Hr1G010980	1.54027	UC
	HORVU5Hr1G084810	1.54002	UC
	HORVU2Hr1G123890	1.52412	UC
	HORVU6Hr1G086590	1.5241	UC
	HORVU3Hr1G110140	1.52395	UC
	HORVU3Hr1G061130	1.52341	UC
	HORVU7Hr1G055980	1.52062	UC
	HORVU2Hr1G108840	1.51554	UC
	HORVU1Hr1G046680	1.50751	UC
	HORVU3Hr1G060570	1.50342	UC
	HORVU2Hr1G038030	1.48861	UC
	HORVU1Hr1G056560	1.48574	UC
	HORVU4Hr1G070090	1.48393	UC
	HORVU1Hr1G053740	1.48275	UC
	HORVU6Hr1G062820	1.47827	UC
	HORVU2Hr1G030840	1.47765	UC
	HORVU5Hr1G020410	1.47616	UC
	HORVU4Hr1G084680	1.4715	UC
	HORVU3Hr1G094320	1.4629	UC
	HORVU6Hr1G008670	1.45928	UC
	HORVU5Hr1G125620	1.45795	UC
	HORVU4Hr1G023300	1.4463	UC
	HORVU1Hr1G038180	1.4444	UC
	HORVU3Hr1G006180	1.44257	UC
	HORVU2Hr1G010010	1.44176	UC
	HORVU0Hr1G009120	1.43715	UC
	HORVU2Hr1G119220	1.43612	UC
	HORVU1Hr1G005680	1.43096	UC
	HORVU2Hr1G031400	1.23823	UC
	HORVU2Hr1G094690	1.42765	UC
	HORVU7Hr1G036920	1.4265	UC
	HORVU2Hr1G093000	1.41519	UC
	HORVU3Hr1G092280	1.40599	UC
	HORVU2Hr1G041110	1.40414	UC
	HORVU2Hr1G003770	1.40391	UC
	HORVU7Hr1G042240	1.39112	UC
	HORVU6Hr1G071700	1.38933	UC
	HORVU2Hr1G100360	1.3823	UC
	HORVU1Hr1G051200	1.37917	UC
	HORVU4Hr1G012000	1.37509	UC
	HORVU6Hr1G069310	1.36719	UC
	HORVU2Hr1G095130	1.36714	UC
	HORVU3Hr1G067750	1.36557	UC
	HORVU1Hr1G013210	1.32637	UC
	HORVU5Hr1G053390	1.359	UC
	HORVU3Hr1G049730	1.34769	UC
	HORVU2Hr1G109170	1.34764	UC
	HORVU2Hr1G116450	1.33409	UC
	HORVU3Hr1G075150	1.33388	UC
	HORVU6Hr1G029240	1.3276	UC
	HORVU1Hr1G010130	1.3218	UC
	HORVU1Hr1G022900	1.31281	UC
	HORVU3Hr1G024400	1.30829	UC
	HORVU5Hr1G042400	1.30479	UC
	HORVU0Hr1G015370	1.29916	UC
	HORVU5Hr1G067480	1.29008	UC
	HORVU5Hr1G061300	1.2808	UC
	HORVU0Hr1G019840	1.27238	UC
	HORVU4Hr1G017660	1.27164	UC
	HORVU2Hr1G021320	1.26554	UC
	HORVU7Hr1G040280	1.25822	UC
	HORVU5Hr1G100800	1.25438	UC
	HORVU3Hr1G100310	1.25402	UC
	HORVU7Hr1G001190	1.25355	UC
	HORVU3Hr1G085710	1.25282	UC
	HORVU2Hr1G123030	1.25256	UC
	HORVU3Hr1G051530	1.24737	UC
	HORVU4Hr1G088620	1.24615	UC
	HORVU4Hr1G056220	1.245	UC
	HORVU7Hr1G038980	1.23455	UC
	HORVU4Hr1G077630	1.21993	UC
	HORVU1Hr1G091090	1.21738	UC
	HORVU2Hr1G072040	1.21407	UC
	HORVU4Hr1G053850	1.21303	UC
	HORVU5Hr1G061040	1.21278	UC
	HORVU5Hr1G105780	1.21276	UC
	HORVU3Hr1G100060	1.20526	UC
	HORVU5Hr1G041490	1.20391	UC
	HORVU3Hr1G042140	1.19774	UC
	HORVU5Hr1G063470	1.1966	UC
	HORVU7Hr1G007900	1.1952	UC
	HORVU2Hr1G096360	1.19335	UC
	HORVU6Hr1G059710	1.18838	UC
	HORVU5Hr1G082760	1.18166	UC
	HORVU2Hr1G060460	1.18032	UC
	HORVU5Hr1G065330	1.17152	UC
	HORVU7Hr1G120340	1.17111	UC
	HORVU3Hr1G111650	1.17089	UC
	HORVU3Hr1G116200	1.16944	UC
	HORVU2Hr1G079270	1.16835	UC
	HORVU3Hr1G089000	1.16767	UC
	HORVU3Hr1G062570	1.15992	UC
	HORVU7Hr1G081320	1.1584	UC
	HORVU7Hr1G061070	1.15451	UC
	HORVU3Hr1G071540	1.15216	UC
	HORVU2Hr1G082420	1.15018	UC
	HORVU2Hr1G033470	1.1477	UC
	HORVU4Hr1G080610	1.14446	UC
	HORVU6Hr1G000520	1.14395	UC
	HORVU6Hr1G064610	1.14223	UC
	HORVU7Hr1G039360	1.14111	UC
	HORVU7Hr1G025680	1.13641	UC
	HORVU6Hr1G087400	1.13555	UC
	HORVU2Hr1G021740	1.1345	UC
	HORVU6Hr1G074650	1.13163	UC
	HORVU5Hr1G116320	1.13118	UC
	HORVU6Hr1G081980	1.13027	UC
	HORVU1Hr1G037110	1.12701	UC
	HORVU3Hr1G058320	1.12212	UC
	HORVU4Hr1G085940	1.1195	UC
	HORVU7Hr1G010370	1.11897	UC
	HORVU1Hr1G064700	1.11445	UC
	HORVU1Hr1G051500	1.11399	UC
	HORVU4Hr1G041610	1.11098	UC
	HORVU5Hr1G122280	1.10528	UC
	HORVU1Hr1G029770	1.10148	UC
	HORVU7Hr1G040250	1.09954	UC
	HORVU3Hr1G024470	1.09756	UC
	HORVU6Hr1G016750	1.09361	UC
	HORVU3Hr1G028210	1.08397	UC
	HORVU5Hr1G118500	1.08281	UC
	HORVU7Hr1G001070	1.06468	UC
	HORVU7Hr1G050160	1.0604	UC
	HORVU1Hr1G002220	1.0556	UC
	HORVU1Hr1G008580	1.05487	UC
	HORVU6Hr1G073280	1.05395	UC
	HORVU2Hr1G028380	1.04672	UC
	HORVU6Hr1G084390	1.04323	UC
	HORVU1Hr1G023330	1.04101	UC
	HORVU3Hr1G017100	1.03577	UC
	HORVU5Hr1G102010	1.03195	UC
	HORVU6Hr1G005240	1.03132	UC
	HORVU7Hr1G033370	1.02951	UC
	HORVU2Hr1G098110	1.02531	UC
	HORVU1Hr1G076090	1.02232	UC
	HORVU2Hr1G068010	1.01506	UC
	HORVU5Hr1G024410	1.00805	UC
	HORVU7Hr1G104830	1.03746	UC
	HORVU2Hr1G063820	1.00799	UC
	HORVU0Hr1G009870	1.00727	UC
	HORVU2Hr1G081650	1.00072	UC
	HORVU2Hr1G092650	1.33372	UC
	HORVU1Hr1G075040	-1.00466	UC
	HORVU2Hr1G067250	-1.00469	UC
	HORVU4Hr1G090660	-1.00699	UC
	HORVU3Hr1G070700	-1.00727	UC
	HORVU5Hr1G022350	-1.0101	UC
	HORVU4Hr1G043530	-1.01156	UC
	HORVU2Hr1G106020	-1.01473	UC
	HORVU5Hr1G104570	-1.01549	UC
	HORVU2Hr1G088110	-1.01959	UC
	HORVU3Hr1G053380	-1.02012	UC
	HORVU6Hr1G050140	-1.02135	UC
	HORVU3Hr1G108930	-1.02221	UC
	HORVU1Hr1G054930	-1.02443	UC
	HORVU5Hr1G043460	-1.02664	UC
	HORVU2Hr1G071110	-1.02778	UC
	HORVU3Hr1G087860	-1.02786	UC
	HORVU6Hr1G077070	-1.03015	UC
	HORVU6Hr1G009820	-1.03055	UC
	HORVU5Hr1G054510	-1.03269	UC
	HORVU1Hr1G014070	-1.03313	UC
	HORVU1Hr1G073150	-1.0349	UC
	HORVU6Hr1G030800	-1.03659	UC
	HORVU1Hr1G019500	-1.03687	UC
	HORVU1Hr1G050830	-1.03919	UC
	HORVU3Hr1G033410	-1.04076	UC
	HORVU5Hr1G109640	-1.04281	UC
	HORVU1Hr1G053050	-1.04297	UC
	HORVU3Hr1G096580	-1.04472	UC
	HORVU4Hr1G022170	-1.04647	UC
	HORVU1Hr1G036920	-1.05203	UC
	HORVU1Hr1G054060	-1.05413	UC
	HORVU2Hr1G013730	-1.05414	UC
	HORVU0Hr1G008650	-1.055	UC
	HORVU7Hr1G032750	-1.05564	UC
	HORVU3Hr1G112690	-1.05665	UC
	HORVU3Hr1G022340	-1.06072	UC
	HORVU4Hr1G002650	-1.06832	UC
	HORVU1Hr1G068770	-1.07097	UC
	HORVU2Hr1G090930	-1.07098	UC
	HORVU7Hr1G077000	-1.07187	UC
	HORVU1Hr1G024740	-1.07407	UC
	HORVU4Hr1G059610	-1.07664	UC
	HORVU1Hr1G004610	-1.0814	UC
	HORVU7Hr1G088560	-1.08533	UC
	HORVU5Hr1G074230	-1.08711	UC
	HORVU4Hr1G054240	-1.09215	UC
	HORVU1Hr1G038700	-1.09529	UC
	HORVU5Hr1G087730	-1.10653	UC
	HORVU2Hr1G093580	-1.10802	UC
	HORVU5Hr1G059430	-1.11538	UC
	HORVU5Hr1G069990	-1.121	UC
	HORVU3Hr1G064040	-1.12433	UC
	HORVU3Hr1G086380	-1.12627	UC
	HORVU7Hr1G087250	-1.12882	UC
	HORVU2Hr1G036210	-1.13035	UC
	HORVU1Hr1G047710	-1.13044	UC
	HORVU7Hr1G000370	-1.1316	UC
	HORVU3Hr1G077880	-1.13393	UC
	HORVU7Hr1G115330	-1.13586	UC
	HORVU1Hr1G016640	-1.13785	UC
	HORVU6Hr1G079810	-1.14083	UC
	HORVU7Hr1G079460	-1.14303	UC
	HORVU2Hr1G073680	-1.14347	UC
	HORVU4Hr1G017240	-1.1453	UC
	HORVU2Hr1G046180	-1.14562	UC
	HORVU4Hr1G010740	-1.14732	UC
	HORVU4Hr1G054870	-1.15055	UC
	HORVU1Hr1G054100	-1.15618	UC
	HORVU6Hr1G033160	-1.1592	UC
	HORVU2Hr1G088760	-1.16178	UC
	HORVU5Hr1G016600	-1.16392	UC
	HORVU1Hr1G073330	-1.16407	UC
	HORVU6Hr1G058840	-1.16445	UC
	HORVU5Hr1G011270	-1.16547	UC
	HORVU6Hr1G017080	-1.16721	UC
	HORVU5Hr1G006330	-1.17015	UC
	HORVU3Hr1G031220	-1.17073	UC
	HORVU3Hr1G095880	-1.17122	UC
	HORVU5Hr1G041250	-1.17601	UC
	HORVU5Hr1G059070	-1.18149	UC
	HORVU5Hr1G013510	-1.18211	UC
	HORVU4Hr1G009070	-1.18238	UC
	HORVU2Hr1G023260	-1.18375	UC
	HORVU3Hr1G060500	-1.18501	UC
	HORVU2Hr1G092900	-1.18518	UC
	HORVU4Hr1G026960	-1.18619	UC
	HORVU3Hr1G075040	-1.18859	UC
	HORVU2Hr1G070700	-1.1894	UC
	HORVU3Hr1G026330	-1.19123	UC
	HORVU6Hr1G064740	-1.19125	UC
	HORVU7Hr1G082560	-1.1973	UC
	HORVU0Hr1G021940	-1.20022	UC
	HORVU5Hr1G103060	-1.20263	UC
	HORVU2Hr1G120260	-1.20282	UC
	HORVU1Hr1G028030	-1.20858	UC
	HORVU7Hr1G108150	-1.20962	UC
	HORVU2Hr1G079610	-1.20965	UC
	HORVU5Hr1G001920	-1.21092	UC
	HORVU3Hr1G055620	-1.21601	UC
	HORVU3Hr1G027160	-1.21645	UC
	HORVU4Hr1G067280	-1.21954	UC
	HORVU2Hr1G107860	-1.22179	UC
	HORVU7Hr1G113350	-1.22277	UC
	HORVU5Hr1G085310	-1.22282	UC
	HORVU7Hr1G093940	-1.22573	UC
	HORVU4Hr1G076750	-1.22691	UC
	HORVU5Hr1G079040	-1.2274	UC
	HORVU6Hr1G011510	-1.23062	UC
	HORVU3Hr1G110350	-1.23241	UC
	HORVU3Hr1G065790	-1.23269	UC
	HORVU4Hr1G059950	-1.23605	UC
	HORVU7Hr1G024980	-1.23844	UC
	HORVU5Hr1G057740	-1.24107	UC
	HORVU4Hr1G005300	-1.24306	UC
	HORVU5Hr1G068770	-1.24413	UC
	HORVU6Hr1G059940	-1.24505	UC
	HORVU1Hr1G020720	-1.24512	UC
	HORVU5Hr1G072520	-1.24818	UC
	HORVU7Hr1G096660	-1.24845	UC
	HORVU4Hr1G054970	-1.24853	UC
	HORVU5Hr1G105950	-1.2521	UC
	HORVU5Hr1G074020	-1.25231	UC
	HORVU2Hr1G067350	-1.25695	UC
	HORVU4Hr1G068420	-1.25845	UC
	HORVU6Hr1G012640	-1.25863	UC
	HORVU2Hr1G046550	-1.25901	UC
	HORVU7Hr1G118690	-1.26155	UC
	HORVU7Hr1G047920	-1.26757	UC
	HORVU3Hr1G109220	-1.27229	UC
	HORVU3Hr1G066810	-1.2727	UC
	HORVU7Hr1G093680	-1.27621	UC
	HORVU6Hr1G076730	-1.28039	UC
	HORVU4Hr1G078690	-1.28141	UC
	HORVU4Hr1G061340	-1.28612	UC
	HORVU1Hr1G049230	-1.28746	UC
	HORVU7Hr1G091100	-1.29072	UC
	HORVU2Hr1G112170	-1.29107	UC
	HORVU3Hr1G056580	-1.29239	UC
	HORVU3Hr1G018980	-1.29421	UC
	HORVU4Hr1G021650	-1.29711	UC
	HORVU4Hr1G063690	-1.29902	UC
	HORVU5Hr1G111520	-1.29933	UC
	HORVU2Hr1G080890	-1.30635	UC
	HORVU7Hr1G091800	-1.30802	UC
	HORVU5Hr1G103680	-1.31052	UC
	HORVU2Hr1G024160	-1.31564	UC
	HORVU7Hr1G008170	-1.32379	UC
	HORVU7Hr1G044210	-1.3238	UC
	HORVU7Hr1G118720	-1.32782	UC
	HORVU3Hr1G016690	-1.33336	UC
	HORVU5Hr1G098300	-1.33663	UC
	HORVU7Hr1G112900	-1.33926	UC
	HORVU6Hr1G058630	-1.34252	UC
	HORVU5Hr1G092290	-1.34493	UC
	HORVU1Hr1G090870	-1.35146	UC
	HORVU2Hr1G075610	-1.3518	UC
	HORVU1Hr1G063510	-1.35305	UC
	HORVU6Hr1G079030	-1.35723	UC
	HORVU2Hr1G001810	-1.3584	UC
	HORVU1Hr1G021150	-1.35916	UC
	HORVU3Hr1G086190	-1.35931	UC
	HORVU3Hr1G074960	-1.35984	UC
	HORVU5Hr1G119270	-1.35989	UC
	HORVU4Hr1G002710	-1.3673	UC
	HORVU7Hr1G079160	-1.36797	UC
	HORVU5Hr1G079660	-1.37481	UC
	HORVU5Hr1G050570	-1.37717	UC
	HORVU7Hr1G030310	-1.38436	UC
	HORVU6Hr1G063800	-1.38858	UC
	HORVU5Hr1G085520	-1.38898	UC
	HORVU2Hr1G046050	-1.38949	UC
	HORVU3Hr1G008400	-1.39102	UC
	HORVU3Hr1G052710	-1.39728	UC
	HORVU1Hr1G051360	-1.3985	UC
	HORVU2Hr1G118700	-1.40128	UC
	HORVU4Hr1G007550	-1.40356	UC
	HORVU6Hr1G059970	-1.4042	UC
	HORVU6Hr1G076340	-1.40514	UC
	HORVU7Hr1G083180	-1.40569	UC
	HORVU0Hr1G023150	-1.41873	UC
	HORVU7Hr1G118010	-1.42356	UC
	HORVU3Hr1G022780	-1.42505	UC
	HORVU3Hr1G013280	-1.42542	UC
	HORVU3Hr1G077660	-1.42578	UC
	HORVU6Hr1G085730	-1.4261	UC
	HORVU3Hr1G095340	-1.42976	UC
	HORVU1Hr1G054230	-1.43134	UC
	HORVU4Hr1G063660	-1.43198	UC
	HORVU4Hr1G003470	-1.43303	UC
	HORVU7Hr1G078530	-1.43335	UC
	HORVU2Hr1G112280	-1.4376	UC
	HORVU4Hr1G046810	-1.43766	UC
	HORVU5Hr1G101990	-1.441	UC
	HORVU2Hr1G072750	-1.4417	UC
	HORVU2Hr1G076720	-1.44186	UC
	HORVU2Hr1G019990	-1.44465	UC
	HORVU1Hr1G008360	-1.44528	UC
	HORVU4Hr1G056610	-1.44985	UC
	HORVU3Hr1G000580	-1.45271	UC
	HORVU4Hr1G053780	-1.45599	UC
	HORVU4Hr1G061440	-1.46003	UC
	HORVU6Hr1G028850	-1.46847	UC
	HORVU1Hr1G063610	-1.47103	UC
	HORVU4Hr1G085480	-1.48488	UC
	HORVU1Hr1G078160	-1.49153	UC
	HORVU4Hr1G019610	-1.50068	UC
	HORVU1Hr1G057460	-1.50118	UC
	HORVU7Hr1G050660	-1.50281	UC
	HORVU2Hr1G092750	-1.50319	UC
	HORVU7Hr1G054610	-1.50677	UC
	HORVU6Hr1G069710	-1.50818	UC
	HORVU6Hr1G067740	-1.51285	UC
	HORVU7Hr1G029920	-1.51295	UC
	HORVU4Hr1G010490	-1.52025	UC
	HORVU7Hr1G011230	-1.52152	UC
	HORVU5Hr1G115310	-1.52373	UC
	HORVU7Hr1G089500	-1.52411	UC
	HORVU1Hr1G083700	-1.53165	UC
	HORVU4Hr1G021370	-1.53193	UC
	HORVU7Hr1G075710	-1.53538	UC
	HORVU6Hr1G016890	-1.53863	UC
	HORVU4Hr1G085990	-1.53872	UC
	HORVU1Hr1G092640	-1.53971	UC
	HORVU7Hr1G099070	-1.5431	UC
	HORVU4Hr1G073020	-1.54664	UC
	HORVU1Hr1G085240	-1.55862	UC
	HORVU5Hr1G105790	-1.5623	UC
	HORVU3Hr1G009360	-1.56488	UC
	HORVU4Hr1G089560	-1.58498	UC
	HORVU1Hr1G091130	-1.58856	UC
	HORVU1Hr1G051580	-1.59249	UC
	HORVU1Hr1G042250	-1.59985	UC
	HORVU3Hr1G094730	-1.60404	UC
	HORVU6Hr1G022590	-1.60643	UC
	HORVU1Hr1G028170	-1.61739	UC
	HORVU7Hr1G036100	-1.6225	UC
	HORVU4Hr1G052320	-1.63033	UC
	HORVU3Hr1G057540	-1.63071	UC
	HORVU5Hr1G025950	-1.63485	UC
	HORVU5Hr1G087800	-1.63539	UC
	HORVU2Hr1G099550	-1.64633	UC
	HORVU3Hr1G051330	-1.65012	UC
	HORVU3Hr1G019820	-1.65139	UC
	HORVU5Hr1G007910	-1.65372	UC
	HORVU5Hr1G071010	-1.6538	UC
	HORVU3Hr1G017160	-1.65516	UC
	HORVU2Hr1G098160	-1.6567	UC
	HORVU7Hr1G054520	-1.65783	UC
	HORVU7Hr1G096250	-1.66156	UC
	HORVU3Hr1G006930	-1.66246	UC
	HORVU3Hr1G094870	-1.66559	UC
	HORVU3Hr1G064960	-1.6715	UC
	HORVU1Hr1G039720	-1.67214	UC
	HORVU0Hr1G016180	-1.678	UC
	HORVU3Hr1G098730	-1.69318	UC
	HORVU1Hr1G090730	-1.69605	UC
	HORVU3Hr1G116220	-1.70049	UC
	HORVU3Hr1G050810	-1.70108	UC
	HORVU1Hr1G083910	-1.708	UC
	HORVU5Hr1G047540	-1.71089	UC
	HORVU3Hr1G020780	-1.71479	UC
	HORVU1Hr1G086900	-1.71753	UC
	HORVU5Hr1G088920	-1.7377	UC
	HORVU4Hr1G072360	-1.7379	UC
	HORVU5Hr1G061160	-1.73859	UC
	HORVU6Hr1G058340	-1.74034	UC
	HORVU2Hr1G013870	-1.7426	UC
	HORVU1Hr1G075760	-1.74327	UC
	HORVU2Hr1G028670	-1.75064	UC
	HORVU1Hr1G020690	-1.75464	UC
	HORVU0Hr1G000760	-1.75625	UC
	HORVU5Hr1G093410	-1.75721	UC
	HORVU7Hr1G056600	-1.76306	UC
	HORVU5Hr1G111040	-1.76971	UC
	HORVU6Hr1G062380	-1.77104	UC
	HORVU2Hr1G122620	-1.77378	UC
	HORVU2Hr1G104390	-1.77964	UC
	HORVU7Hr1G083390	-1.7809	UC
	HORVU4Hr1G063790	-1.78374	UC
	HORVU7Hr1G046320	-1.78803	UC
	HORVU3Hr1G085050	-1.78901	UC
	HORVU1Hr1G041960	-1.79023	UC
	HORVU5Hr1G007730	-1.79666	UC
	HORVU7Hr1G091880	-1.80666	UC
	HORVU5Hr1G014110	-1.80828	UC
	HORVU6Hr1G009280	-1.81089	UC
	HORVU7Hr1G115360	-1.81136	UC
	HORVU3Hr1G091020	-1.81247	UC
	HORVU0Hr1G003270	-1.81338	UC
	HORVU2Hr1G060480	-1.81767	UC
	HORVU0Hr1G004670	-1.82251	UC
	HORVU4Hr1G028780	-1.82592	UC
	HORVU5Hr1G042370	-1.83072	UC
	HORVU4Hr1G076330	-1.84025	UC
	HORVU7Hr1G072960	-1.84144	UC
	HORVU6Hr1G076980	-1.84987	UC
	HORVU5Hr1G077640	-1.86777	UC
	HORVU2Hr1G122630	-1.88548	UC
	HORVU3Hr1G117440	-1.88743	UC
	HORVU3Hr1G069720	-1.92077	UC
	HORVU1Hr1G085830	-1.92645	UC
	HORVU1Hr1G061380	-1.94252	UC
	HORVU4Hr1G051530	-1.94576	UC
	HORVU5Hr1G081260	-1.95811	UC
	HORVU2Hr1G028310	-1.95863	UC
	HORVU1Hr1G084520	-1.96458	UC
	HORVU7Hr1G118770	-1.97563	UC
	HORVU1Hr1G014200	-1.98858	UC
	HORVU0Hr1G038820	-1.99776	UC
	HORVU7Hr1G075130	-1.9984	UC
	HORVU7Hr1G073350	-2.01607	UC
	HORVU7Hr1G046760	-2.02376	UC
	HORVU1Hr1G065660	-2.02599	UC
	HORVU3Hr1G081170	-2.03603	UC
	HORVU0Hr1G017790	-2.04462	UC
	HORVU3Hr1G026690	-2.05037	UC
	HORVU5Hr1G109290	-2.0512	UC
	HORVU1Hr1G023460	-2.05807	UC
	HORVU4Hr1G008070	-2.06138	UC
	HORVU7Hr1G083270	-2.07284	UC
	HORVU4Hr1G038810	-2.08347	UC
	HORVU1Hr1G053650	-2.08641	UC
	HORVU4Hr1G069970	-2.09423	UC
	HORVU4Hr1G083150	-2.10783	UC
	HORVU7Hr1G089320	-2.10913	UC
	HORVU1Hr1G061160	-2.1202	UC
	HORVU7Hr1G113480	-2.13976	UC
	HORVU6Hr1G034250	-2.15212	UC
	HORVU2Hr1G092070	-2.17195	UC
	HORVU2Hr1G065750	-2.18599	UC
	HORVU2Hr1G124330	-2.19251	UC
	HORVU2Hr1G029290	-2.19461	UC
	HORVU2Hr1G114220	-2.19519	UC
	HORVU4Hr1G076940	-2.2	UC
	HORVU2Hr1G014020	-2.20499	UC
	HORVU4Hr1G058560	-2.20581	UC
	HORVU5Hr1G022960	-2.21579	UC
	HORVU2Hr1G076490	-2.21775	UC
	HORVU5Hr1G073710	-2.23036	UC
	HORVU5Hr1G116660	-2.2308	UC
	HORVU2Hr1G032330	-2.24087	UC
	HORVU1Hr1G043580	-2.24225	UC
	HORVU5Hr1G042330	-2.24227	UC
	HORVU3Hr1G018610	-2.25767	UC
	HORVU2Hr1G071330	-2.27045	UC
	HORVU6Hr1G066420	-2.29126	UC
	HORVU4Hr1G079990	-2.30525	UC
	HORVU2Hr1G067700	-2.31909	UC
	HORVU2Hr1G096880	-2.32201	UC
	HORVU2Hr1G079810	-2.32206	UC
	HORVU5Hr1G103770	-2.33013	UC
	HORVU2Hr1G011690	-2.33265	UC
	HORVU0Hr1G007620	-2.33388	UC
	HORVU4Hr1G045210	-2.33868	UC
	HORVU4Hr1G089890	-2.37109	UC
	HORVU6Hr1G032410	-2.37413	UC
	HORVU2Hr1G012980	-2.37521	UC
	HORVU6Hr1G006860	-2.38069	UC
	HORVU4Hr1G027610	-2.3837	UC
	HORVU1Hr1G076590	-2.39311	UC
	HORVU3Hr1G033610	-2.403	UC
	HORVU1Hr1G088550	-2.42132	UC
	HORVU5Hr1G086520	-2.43303	UC
	HORVU2Hr1G065000	-2.4341	UC
	HORVU2Hr1G093660	-2.44972	UC
	HORVU1Hr1G019750	-2.46388	UC
	HORVU0Hr1G019630	-2.46392	UC
	HORVU3Hr1G026050	-2.46482	UC
	HORVU4Hr1G079620	-2.47334	UC
	HORVU7Hr1G089530	-2.50823	UC
	HORVU7Hr1G084610	-2.50845	UC
	HORVU4Hr1G011420	-2.5302	UC
	HORVU2Hr1G104120	-2.55274	UC
	HORVU2Hr1G012270	-2.55598	UC
	HORVU4Hr1G002770	-2.55645	UC
	HORVU5Hr1G020500	-2.57455	UC
	HORVU1Hr1G043890	-2.58957	UC
	HORVU2Hr1G044940	-2.6289	UC
	HORVU2Hr1G003070	-2.6306	UC
	HORVU1Hr1G082820	-2.6526	UC
	HORVU3Hr1G077070	-2.66052	UC
	HORVU3Hr1G067510	-2.71813	UC
	HORVU3Hr1G064680	-2.7363	UC
	HORVU5Hr1G073650	-2.74241	UC
	HORVU2Hr1G013940	-2.75408	UC
	HORVU5Hr1G080680	-2.77475	UC
	HORVU6Hr1G077670	-2.7962	UC
	HORVU4Hr1G081180	-2.80816	UC
	HORVU5Hr1G044390	-2.8414	UC
	HORVU3Hr1G104200	-2.86126	UC
	HORVU3Hr1G105400	-2.86532	UC
	HORVU3Hr1G071370	-2.87482	UC
	HORVU2Hr1G106180	-3.00599	UC
	HORVU3Hr1G010390	-3.11822	UC
	HORVU1Hr1G024280	-3.13086	UC
	HORVU0Hr1G022690	-3.17195	UC
	HORVU3Hr1G030970	-3.19932	UC
	HORVU4Hr1G007220	-3.25246	UC
	HORVU5Hr1G110090	-3.31158	UC
	HORVU7Hr1G030830	-3.41432	UC
	HORVU7Hr1G116310	-3.58823	UC
	HORVU2Hr1G014870	-3.62121	UC
	HORVU5Hr1G099470	-3.90197	UC
	HORVU6Hr1G070550	-3.91067	UC
	HORVU2Hr1G104220	-3.97974	UC
	HORVU1Hr1G077680	-3.99452	UC
	HORVU5Hr1G067760	-4.39382	UC
	HORVU5Hr1G073690	-4.47466	UC
	HORVU5Hr1G106020	-4.50678	UC
	HORVU6Hr1G070540	-5.12895	UC

## Sheet: Cluster R1
Category	Gene ID	Log2FC H2O2 vs. control	Log2FC LaCl3+H2O2 vs. control	Functional annotation	Predicted ortholog in A.thaliana
TFs
	HORVU2Hr1G097850	2.7667	UC	AP2/ERF domain containing protein	no
	HORVU4Hr1G071890	1.13019	UC	AP2/ERF domain containing protein	AT5G19790 (AtRAP2.4)
	HORVU1Hr1G090190	2.02451	UC	WRKY domain containing protein	no
	HORVU3Hr1G050590	1.65273	UC	WRKY domain containing protein	no
	HORVU2Hr1G027600	1.63745	UC	Uncharacterized protein	AT1G57560 (AtMYB50)
	HORVU7Hr1G116750	1.58688	UC	Uncharacterized protein	AT5G67300 (AtMYBR1)
	HORVU3Hr1G065880	1.37317	UC	Uncharacterized protein	AT5G26660 (AtMYB86)
	HORVU2Hr1G020140	1.31979	UC	HTH myb-type domain containing protein	AT1G25550 (AtHHO3/AtNIGT1.1)
	HORVU6Hr1G007010	1.27932	UC	Predicted protein	AT3G14000 (AtMYB86)
	HORVU3Hr1G016940	1.22298	UC	Uncharacterized protein	AT5G26660 (AtMYB86)
	HORVU7Hr1G070730	1.15155	UC	Uncharacterized protein	AT5G45420 (Atmamyb)
	HORVU4Hr1G049960	2.71969	UC	OVATE domain containing protein	no
	HORVU4Hr1G051350	2.63756	UC	OVATE domain containing protein	no
	HORVU2Hr1G093380	1.94564	UC	OVATE domain containing protein	no
	HORVU6Hr1G065900	1.77379	UC	OVATE domain containing protein	no
	HORVU5Hr1G059160	3.0879	UC	BHLH domain containing protein	no
	HORVU5Hr1G018100	2.29643	UC	BHLH domain containing protein	no
	HORVU4Hr1G003340	1.92444	UC	BHLH domain containing protein	AT2G22750 (AtbHLH018)
	HORVU4Hr1G075180	1.57597	UC	Homeobox domain containing protein	AT1G69780 (ATHB13 )
	HORVU5Hr1G014320	1.61297	UC	F-box domain containing protein	AT3G54650 (AtFBL17)
	HORVU5Hr1G023880	1.01189	UC	Foie gras domain containing protein	AT5G54440 (AtCLUB)
	HORVU4Hr1G088280	1.32356	UC	GATA domain containing protein	AT2G45050 (AtGATA-2)
	HORVU2Hr1G040910	2.30277	UC	LEA_2 domain containing protein	AT5G22200
Cell wall
	HORVU5Hr1G119680	3.50689	UC	Expansin	AT1G20190 (AtEXPA11)
	HORVU4Hr1G072440	1.95098	UC	Expansin	AT1G20190 (AtEXP11)
	HORVU5Hr1G119670	3.4742	UC	Expansin	AT1G20190 (AtEXPA11)
	HORVU2Hr1G097490	3.26925	UC	Expansin-like EG45 domain containing protein	AT2G45110 (AtEXPB4)
	HORVU3Hr1G034080	4.00077	UC	Uncharacterized protein	AT4G01630 (AtEXPA17)
	HORVU1Hr1G054210	1.02175	UC	Predicted protein	AT1G65680 (AtEXPB2)
	HORVU4Hr1G072660	2.60508	UC	Expansin	AT1G20190 (AtEXPA11)
	HORVU7Hr1G002440	2.23341	UC	Expansin	AT1G12560 (AtEXPA7)
	HORVU2Hr1G111030	2.11857	UC	Xyloglucan endotransglucosyalase	AT5G57530 (AtXTH12)
	HORVU3Hr1G016820	2.04035	UC	Xyloglucan endotransglucosyalase	AT5G57550 (AtXTH25)
	HORVU7Hr1G081740	1.92293	UC	Xyloglucan endotransglucosyalase	AT4G28850 (AtXTH26)
	HORVU7Hr1G098390	1.84169	UC	Xyloglucan endotransglusyalase	AT4G25810 (XTR6)
	HORVU3Hr1G016800	1.44222	UC	Xyloglucan endotransglucosyalase	AT5G57550 (AtXTR3)
	HORVU5Hr1G118270	1.43266	UC	Cellulose synthase	AT5G64740 (AtCESA6)
	HORVU2Hr1G036980	1.44732	UC	Glucan endo-1,3-beta-D-glucosidase	AT3G13560 (AtPdBG1)
	HORVU2Hr1G120100	1.47094	UC	Endoglucanase	AT1G48930 (AtGH9C1)
	HORVU5Hr1G114540	1.01502	UC	Pectin acetyl-esterase	AT4G19410 (AtPAE7)
	HORVU5Hr1G010860	1.46835	UC	Pectinesterase	AT3G14310 (AtPME3)
	HORVU3Hr1G116470	2.07264	UC	Pectin acetyl-transferase	no
Glutathione and detoxification
	HORVU2Hr1G076100	1.05515	UC	GST N-terminal transferase	AT1G77290
	HORVU7Hr1G100570	1.58956	UC	Glutahione Synthetase	AT5G27380 (AtGSH2)
	HORVU4Hr1G078380	1.99309	UC	HMA domain containing protein	no
	HORVU4Hr1G011690	2.26919	UC	DETOXIFICATION	AT3G26590 (AtDTX29)
	HORVU1Hr1G072500	1.21409	UC	HMA domain containing protein	no
Heatshock
	HORVU7Hr1G072610	1.03774	UC	J domain containing protein	AT1G77020
Anti-oxidant enzymes
	HORVU1Hr1G081270	4.80066	UC	Peroxidase	AT1G05260 (AtRCI3)
	HORVU7Hr1G026070	4.54195	UC	Peroxidase	AT5G05340 (AtPRX52)
	HORVU7Hr1G039550	3.97952	UC	Peroxidase	AT1G05260 (AtRCI3)
	HORVU2Hr1G026640	3.6585	UC	Peroxidase	AT1G05260 (AtRCI3)
	HORVU7Hr1G010280	3.59683	UC	Peroxidase	AT4G11290 (AtPRX39)
	HORVU7Hr1G091390	3.51402	UC	Peroxidase	AT5G05340 (AtPRX52)
	HORVU1Hr1G066580	3.15645	UC	Peroxidase_4 related protein	no
	HORVU1Hr1G066540	3.1025	UC	Peroxidase precursor protein	AT1G05260 (AtRCI3)
	HORVU4Hr1G064950	3.08124	UC	Peroxidase	AT5G06720 (AtPA2)
	HORVU1Hr1G016730	2.96966	UC	Peroxidase	AT2G18140 (AtPRX14)
	HORVU2Hr1G018550	2.91647	UC	Peroxidase	AT5G05340 (AtPRX52)
	HORVU2Hr1G026380	2.82997	UC	Peroxidase	AT4G11290 (AtPRX39)
	HORVU2Hr1G064330	2.81815	UC	Peroxidase	AT1G05260 (AtRCI3)
	HORVU7Hr1G039590	2.74585	UC	Peroxidase	AT1G05260 (AtRCI3)
	HORVU2Hr1G018530	2.60547	UC	Peroxidase	AT5G05340 (AtPRX52)
	HORVU7Hr1G093400	2.27781	UC	Peroxidase	AT4G11290 (AtPRX39)
	HORVU1Hr1G069000	2.27116	UC	Peroxidase	AT4G11290 (AtPRX39)
	HORVU0Hr1G002840	2.17324	UC	Peroxidase	AT4G11290 (AtPRX39)
	HORVU2Hr1G064390	2.14144	UC	Peroxidase	AT1G05260 (AtRCI3)
	HORVU2Hr1G100610	2.07848	UC	Peroxidase	AT5G17820 (AtPRX57/AtPRXR10)
	HORVU2Hr1G051250	2.00228	UC	Peroxidase	AT1G30870 (AtPRX7)
	HORVU5Hr1G097130	1.88195	UC	Peroxidase	AT5G17820 (AtPRX57/AtPRXR10)
	HORVU2Hr1G026520	1.84197	UC	Peroxidase	AT4G11290 (AtPRX39)
	HORVU6Hr1G026600	1.67994	UC	Peroxidase	AT5G05340 (AtPRX52)
	HORVU7Hr1G098110	1.37663	UC	Peroxidase	AT5G06730 (AtPRX54)
	HORVU7Hr1G045600	1.36575	UC	Peroxidase	AT1G05260 (AtRCI3)
	HORVU1Hr1G054640	1.36213	UC	Peroxidase	AT5G17820 (AtPRX57/AtPRXR10)
	HORVU1Hr1G066600	2.6641	UC	Peroxidase	AT1G05260 (AtRCI3)
	HORVU7Hr1G108210	2.0825	UC	Peroxidase	AT4G33420 (AtPRX47)
	HORVU2Hr1G026590	1.93038	UC	Peroxidase	AT4G11290 (AtPRX39)
Ca2+ signaling
Ca2+ sensors	HORVU5Hr1G044710	2.7694	UC	Uncharacterized protein	AT2G27030 (AtCAM5)
	HORVU1Hr1G072140	1.05833	UC	EF-hand domain containing protein	AT5G47910 (AtRbOHD)
	HORVU2Hr1G068010	1.01506	UC	PKS_ER domain containing protein	AT4G13010 (AtceQORH)
Ca2+-associated kinases	HORVU6Hr1G094990	2.14694	UC	Protein kinase domain containing protein	AT4G35310 (AtCPK5)
	HORVU1Hr1G090940	2.38662	UC	Protein kinase domain containing protein	AT3G18040 (AtMPK9)
Kinases (Diverse)
	HORVU7Hr1G002130	2.75673	UC	Protein kinase domain containing protein	AT3G47090
	HORVU1Hr1G069510	2.74903	UC	Protein kinase domain containing protein	AT5G58300 (AtKOIN)
	HORVU7Hr1G047570	2.5611	UC	Protein kinase domain containing protein	AT5G38560 (AtPERK8)
	HORVU2Hr1G080770	2.17042	UC	Protein kinase domain containing protein	AT5G24100
	HORVU5Hr1G046020	1.99592	UC	Protein kinase domain containing protein	AT5G01020 (AtPBL8)
	HORVU7Hr1G114400	1.91459	UC	Protein kinase domain containing protein	AT2G25220
	HORVU5Hr1G071340	1.44489	UC	Protein kinase domain containing protein	AT5G56040 (AtRGI4/AtSKM2)
	HORVU3Hr1G081050	1.3285	UC	Protein kinase domain containing protein	AT3G56370 (AtIRK)
	HORVU2Hr1G123200	1.25192	UC	Protein kinase domain containing protein	AT2G01820 (AtTMK3/AtBLK2)
	HORVU1Hr1G049860	1.02729	UC	Protein kinase domain containing protein	AT5G46570 (AtBSK2)
	HORVU6Hr1G030880	1.01007	UC	Protein kinase domain containing protein	AT4G03390 (AtSRF3)
	HORVU5Hr1G007340	1.28914	UC	Protein kinase domain containing protein	AT2G26730
	HORVU7Hr1G111360	1.40449	UC	Uncharacterized protein	AT5G10720 (AtAHK5)
Transporters
	HORVU7Hr1G121250	1.09987	UC	Aquaporin NIP3	AT4G18910 (AtNIP1;2)
	HORVU7Hr1G038270	1.00383	UC	Aquaporin NIP2-2	AT5G37820 (AtNLM5)
	HORVU3Hr1G079420	3.2758	UC	WAT1-related protein	AT5G64700 (AtUMAMIT21)
	HORVU3Hr1G002710	1.27524	UC	WAT1-related protein	AT1G75500 (AtWAT1)
	HORVU1Hr1G077520	1.45736	UC	Phosphate transporter	AT5G44370 (AtPHT4;6)
	HORVU6Hr1G095020	2.08717	UC	MFS domain containing protein	AT3G15353 (AtTMT3)
	HORVU2Hr1G036530	1.65527	UC	MFS domain containing protein	AT3G18830 (AtPLT5)
	HORVU6Hr1G092430	1.42263	UC	Cit MHS domain containing	AT1G02260
	HORVU1Hr1G091460	1.37359	UC	MFS domain containing protein	AT1G19450 (AtERDL4/AtESL1.01)
	HORVU2Hr1G092980	1.80755	UC	Uncharacterized protein	AT5G04770 (AtCAT6)
	HORVU5Hr1G107380	1.03151	UC	Chloride (Cl-) channel protein	AT5G33280 (AtCLCg)
	HORVU4Hr1G087670	2.83669	UC	ABC transporter domain containing protein	AT3G47780 (AtATH6)
	HORVU6Hr1G083160	1.05866	UC	H+ exporting diphosphatase	AT1G16780 (AtVHP2;2)
Hormones
JA and oxylipins	HORVU2Hr1G117140	2.54424	UC	Uncharacterized protein	AT2G27690 (AtCYP94C1)
	HORVU7Hr1G036060	1.56096	UC	Oxido red FMN domain	AT1G09400 (AtOPR6)
Auxin	HORVU5Hr1G076210	2.49496	UC	Auxin efflux carrier component	AT5G16530 (AtPIN5)
	HORVU7Hr1G051930	1.13658	UC	Auxin response factor	no
GA3	HORVU3Hr1G022840	1.93191	UC	Fe2OG dioxygenase domain containing protein	AT1G15550 (AtGa3-Ox1)
Ethylene	HORVU4Hr1G017660	1.27164	UC	Fe2OG dioxygenase domain containing protein	AT1G77330 (AtACO5)
Others
	HORVU7Hr1G094730	3.80635	UC	Uncharacterized protein	no
	HORVU1Hr1G001690	3.67315	UC	Uncharacterized protein	no
	HORVU6Hr1G083350	3.13255	UC	SCP domain containing protein	no
	HORVU1Hr1G082610	3.13217	UC	Uncharacterized protein	no
	HORVU4Hr1G081190	3.08412	UC	Uncharacterized protein	no
	HORVU3Hr1G065810	2.95375	UC	fn3_6 domain containing protein	AT2G04160 (AtSBT5.3/AtAIR3)
	HORVU1Hr1G065710	2.90672	UC	Uncharacterized protein	no
	HORVU6Hr1G084840	2.8913	UC	Rx_N domain containing protein	AT3G46530 (AtRPP13)
	HORVU7Hr1G001960	2.80589	UC	Uncharacterized protein	no
	HORVU7Hr1G120400	2.71661	UC	NB-ARC domain containing protein	no
	HORVU4Hr1G088020	2.67603	UC	Uncharacterized protein	AT1G12110 (AtNRT1.1)
	HORVU3Hr1G003650	2.65855	UC	Uncharacterized protein	no
	HORVU3Hr1G072590	2.65004	UC	Uncharacterized protein	no
	HORVU7Hr1G122200	2.52162	UC	Uncharacterized protein	AT3G14460
	HORVU4Hr1G052970	2.5173	UC	Uncharacterized protein	no
	HORVU1Hr1G001700	2.4764	UC	Uncharacterized protein	no
	HORVU2Hr1G103000	2.46163	UC	Tyrosinase_Cu-bd domain containing protein	no
	HORVU7Hr1G002050	2.46142	UC	Uncharacterized protein	AT5G24000
	HORVU3Hr1G098950	2.45808	UC	Uncharacterized protein	AT3G26700
	HORVU4Hr1G058270	2.4404	UC	Uncharacterized protein	no
	HORVU2Hr1G111090	2.43453	UC	XET_C domain containing protein	no
	HORVU2Hr1G044220	2.43082	UC	Phytocyanin domain containing protein	no
	HORVU6Hr1G064350	2.39923	UC	Uncharacterized protein	no
	HORVU3Hr1G013470	2.39274	UC	Uncharacterized protein	AT2G26170 (AtCYP711A1)
	HORVU7Hr1G096350	2.37964	UC	Laccase (Benzenediol:oxygen oxidoreductase) (Diphenol oxidase) (Urishiol oxidase)	AT5G60020 (AtLAC17)
	HORVU1Hr1G082340	2.36688	UC	Cytochrome b561 and DOMON domain containing protein	AT1G08200 (AtAXS2)
	HORVU5Hr1G026030	2.3302	UC	Predicted protein	AT5G55050 (AtGLP104/AtGELP104)
	HORVU6Hr1G083320	2.32554	UC	Uncharacterized protein	no
	HORVU3Hr1G011440	2.31411	UC	Uncharacterized protein	no
	HORVU2Hr1G045020	2.30876	UC	Peptidase A1 domain containing protein	AT2G03200
	HORVU5Hr1G074110	2.30736	UC	Predicted protein	no
	HORVU3Hr1G107540	2.30263	UC	Uncharacterized protein	no
	HORVU2Hr1G080240	2.30192	UC	Kinesin-like protein	AT4G05190 (AtATK5)
	HORVU2Hr1G081920	2.2963	UC	Glycerophosphodiester phosphodiesterase	AT5G55480 (AtSVL1)
	HORVU2Hr1G099740	2.27265	UC	Uncharacterized protein	no
	HORVU4Hr1G005140	2.27183	UC	Uncharacterized	AT5G15050 (AtGlcAT14B)
	HORVU3Hr1G018190	2.2704	UC	Uncharacterized protein	AT5G05500
	HORVU6Hr1G094070	2.26948	UC	Uncharacterized protein	no
	HORVU5Hr1G098260	2.25712	UC	Uncharacterized protein	no
	HORVU2Hr1G113430	2.25524	UC	GRANULINS domain containing protein	no
	HORVU6Hr1G088480	2.23527	UC	Uncharacterized protein	AT5G48930 (AtHCT)
	HORVU4Hr1G020580	2.22791	UC	Uncharacterized protein	no
	HORVU0Hr1G009060	2.22564	UC	AB hydrolase-1 domain containing protein	AT5G09430
	HORVU1Hr1G011390	2.22103	UC	Uncharacterized protein	no
	HORVU1Hr1G001680	2.21251	UC	Uncharacterized protein	no
	HORVU4Hr1G089830	2.20427	UC	AAI domain containing protein	no
	HORVU0Hr1G031750	2.19469	UC	AAI domain containing protein	no
	HORVU4Hr1G089770	2.67519	UC	AAI domain containing protein	no
	HORVU7Hr1G109140	1.33042	UC	AAI domain containing protein	no
	HORVU2Hr1G104430	2.12826	UC	AAI domain containing protein	AT5G05960 (AtLtpV.3)
	HORVU7Hr1G109020	1.64114	UC	AAI domain containing protein	no
	HORVU4Hr1G079800	1.13535	UC	AAI domain containing protein	no
	HORVU1Hr1G054040	1.53098	UC	AAI domain containing protein	no
	HORVU0Hr1G025250	2.33743	UC	AAI domain containing protein	no
	HORVU2Hr1G025660	2.18018	UC	Predicted protein	no
	HORVU6Hr1G060700	2.17978	UC	Remorin_C domain containing protein	AT5G23750 (AtREM1.4)
	HORVU2Hr1G019770	2.17371	UC	Uncharacterized protein	no
	HORVU3Hr1G059790	2.16423	UC	Uncharacterized protein	no
	HORVU3Hr1G082440	2.16076	UC	Uncharacterized protein	AT1G22550 (AtNPF5.16)
	HORVU6Hr1G095330	2.15269	UC	T-SNARE coiled homology domain containing protein	AT5G08080 (AtSYP132)
	HORVU2Hr1G082530	2.14802	UC	CRAL-TRIO domain containing protein	AT2G21540 (AtSFH3)
	HORVU6Hr1G064220	2.13966	UC	Predicted protein	AT5G03555 (AtPLUTO/AtNCS1)
	HORVU1Hr1G082410	2.13647	UC	Uncharacterized protein	no
	HORVU2Hr1G028610	2.11185	UC	Uncharacterized protein	AT1G69640 (AtSBH1)
	HORVU2Hr1G098560	2.10551	UC	Uncharacterized protein	no
	HORVU5Hr1G095010	2.0904	UC	Glycosyl transferase	AT2G15480 (AtUGT73B5)
	HORVU2Hr1G110310	2.08161	UC	Uncharacterized protein	no
	HORVU5Hr1G100980	2.07975	UC	Uncharacterized protein	no
	HORVU1Hr1G082460	2.07528	UC	Uncharacterized protein	no
	HORVU2Hr1G003720	2.07149	UC	Uncharacterized protein	AT5G45910 (AtGLP101/AtGELP101)
	HORVU6Hr1G086790	2.06256	UC	Uncharacterized protein	no
	HORVU6Hr1G066750	2.03753	UC	Uncharacterized protein	no
	HORVU7Hr1G089230	2.02138	UC	Uncharacterized protein	AT5G44400 (AtBBE26)
	HORVU6Hr1G000040	2.01778	UC	Uncharacterized protein	AT5G12860 (AtOMT1)
	HORVU4Hr1G019890	2.01655	UC	C2H2-type domain containing protein	AT1G75710
	HORVU6Hr1G005930	1.97707	UC	Uncharacterized protein	AT1G08090 (AtNRT2.4)
	HORVU3Hr1G079850	1.96122	UC	IPPc domain containing protein	AT5G04980 (At5PTase10)
	HORVU7Hr1G122730	1.95421	UC	Uncharacterized protein	AT5G23960 (AtTPS21)
	HORVU7Hr1G057840	1.95103	UC	Uncharacterized protein	no
	HORVU1Hr1G076460	1.93093	UC	GLOBIN domain containing protein	At4g01900 (AtGLB1)
	HORVU4Hr1G080100	1.92775	UC	Uncharacterized protein	AT5G17540
	HORVU6Hr1G038490	1.90896	UC	Syn n domain containing protein	At1g61290 (AtSYP124)
	HORVU3Hr1G031540	1.90424	UC	L-gulonolactone oxidase	no
	HORVU1Hr1G021070	1.90106	UC	L-gulonolactone oxidase	AT2G46740 (AtGULLO5)
	HORVU1Hr1G062950	1.89142	UC	Uncharacterized protein	AT3G26230 (AtCYP71B24)
	HORVU7Hr1G021440	1.87949	UC	Uncharacterized protein	AT1G31490
	HORVU4Hr1G020640	1.87331	UC	Uncharacterized protein	no
	HORVU7Hr1G043010	1.85864	UC	PMR5N domain containing protein	AT5G15890 (AtTBL21)
	HORVU3Hr1G055740	1.85435	UC	Uncharacterized protein	At5g24030 (AtSLAH3)
	HORVU3Hr1G092310	1.84824	UC	Gnk2-homologous domain containing protein	no
	HORVU7Hr1G119410	1.83442	UC	Uncharacterized protein	no
	HORVU5Hr1G046370	1.81586	UC	Mannan endo-1,4-beta-mannosidase	AT5G01930 (AtMAN6)
	HORVU6Hr1G000540	1.81578	UC	Uncharacterized protein	no
	HORVU5Hr1G028140	1.80277	UC	Uncharacterized protein	At4g37680 (AtHHP4)
	HORVU3Hr1G082300	1.79227	UC	Uncharacterized protein	AT3G04520 (AtTHA2)
	HORVU4Hr1G085890	1.79007	UC	Beta elim lyase domain	AT1G22540 (AtNPF5.10)
	HORVU4Hr1G036820	1.78981	UC	Uncharacterized protein	no
	HORVU3Hr1G079730	1.78754	UC	4-hydroxy-7-methoxy-3-oxo-3,4-dihydro-2H-1,4-benzoxazin-2-yl glucosidebeta-D-glucosidase,	AT1G02850 (AtBGLU11)
	HORVU1Hr1G082370	1.77354	UC	Uncharacterized protein	no
	HORVU1Hr1G057520	1.76476	UC	Methyltransferase	AT5G04060 (AtPMT7)
	HORVU7Hr1G046210	1.7634	UC	Arabinogalactan protein 1 (Predicted protein)	no
	HORVU5Hr1G075390	1.75927	UC	DOMON domain containing protein	AT5G35735
	HORVU4Hr1G066430	1.75836	UC	Phosphomannomutase	AT2G45790 (AtATPMM)
	HORVU7Hr1G080250	1.75243	UC	Uncharacterized protein	AT2G45790 (AtATPMM)
	HORVU6Hr1G020120	1.74358	UC	Inhibitor I9 domain containing protein	AT4G10550 (AtSBT3.6)
	HORVU1Hr1G082020	1.73768	UC	Uncharacterized protein	AT3G16520 (AtUGT88A1)
	HORVU3Hr1G094140	1.71946	UC	Nucleotid_trans domain containing protein	AT2G02061
	HORVU3Hr1G067130	1.70782	UC	Uncharacterized protein	no
	HORVU2Hr1G078380	1.70289	UC	Uncharacterized protein	no
	HORVU2Hr1G022690	1.68917	UC	Uncharacterized protein	no
	HORVU4Hr1G002160	1.68574	UC	Uncharacterized protein	AT3G03680 (AtMCTP14)
	HORVU2Hr1G024740	1.68491	UC	Hexosyltransferase	AT3G06260 (AtGATL4)
	HORVU2Hr1G042350	1.67481	UC	Uncharacterized protein	AT5G16910 (AtCSLD2)
	HORVU3Hr1G101930	1.63731	UC	RRM domain containing protein	AT4G03110 (AtRBP-DR1)
	HORVU2Hr1G095080	1.63174	UC	Uncharacterized protein	AT1G12740 (AtCYP87A2)
	HORVU4Hr1G066000	1.63041	UC	Phytosulfokine-alpha	no
	HORVU6Hr1G078990	1.62644	UC	Growth-regulating factor	no
	HORVU1Hr1G010390	1.61395	UC	NAB domain containing protein	AT2G22560 (AtNET2D)
	HORVU4Hr1G063430	1.61252	UC	Uncharacterized protein	no
	HORVU1Hr1G065070	1.60935	UC	Uncharacterized protein	AT1G10710 (AtPHS1)
	HORVU1Hr1G052950	1.60413	UC	Uncharacterized protein	no
	HORVU5Hr1G037890	1.60325	UC	Uncharacterized protein	no
	HORVU1Hr1G074820	1.60214	UC	Uncharacterized protein	AT5G67090 (AtSBT1.9)
	HORVU3Hr1G109930	1.6	UC	Glyco_trans_2-like domain containing protein	AT5G03760 (AtCSLA09)
	HORVU4Hr1G083620	1.5993	UC	Uncharacterized protein	no
	HORVU7Hr1G074330	1.59768	UC	Uncharacterized protein	AT3G25690 (AtCHUP1)
	HORVU2Hr1G004200	1.59205	UC	Fe2OG dioxygenase domain containing protein	AT2G34770 (AtFAH1)
	HORVU7Hr1G121200	1.58768	UC	Uncharacterized protein	AT5G43470 (AtRPP8)
	HORVU2Hr1G087370	1.58701	UC	Uncharacterized protein	AT4G06744
	HORVU5Hr1G056470	1.58158	UC	Predicted protein	AT5G60860 (AtRABA1f)
	HORVU6Hr1G019780	1.56496	UC	X8 domain containing protein	no
	HORVU3Hr1G084680	1.56253	UC	Oxidored_FMN domain containing protein	AT5G05710
	HORVU7Hr1G119150	1.55821	UC	Uncharacterized protein	AT1G20130 (AtGLP4/AtGELP4)
	HORVU2Hr1G022820	1.54351	UC	Peptidase A1 domain containing protein	AT3G54400
	HORVU6Hr1G010980	1.54027	UC	Fe2OG dioxygenase domain containing protein	AT3G60290
	HORVU5Hr1G084810	1.54002	UC	Uncharacterized protein	AT5G48930 (AtHCT)
	HORVU2Hr1G123890	1.52412	UC	3Beta_HSD domain containing protein	AT1G61720 (AtBAN)
	HORVU6Hr1G086590	1.5241	UC	Glycosyltransferase	AT1G22360 (AtUGT85A2)
	HORVU3Hr1G110140	1.52395	UC	NUC173 domain containing protein	AT4G23540
	HORVU3Hr1G061130	1.52341	UC	FAS1 domain containing protein	At1g03870 (AtFLA9)
	HORVU7Hr1G055980	1.52062	UC	Uncharacterized protein	AT3G59350 (AtCARK5/AtPTI1-3/AtMAZ)
	HORVU2Hr1G108840	1.51554	UC	Kinesin protein	AT5G65930 (AtZWI)
	HORVU1Hr1G046680	1.50751	UC	Uncharacterized protein	no
	HORVU3Hr1G060570	1.50342	UC	Predicted protein	no
	HORVU2Hr1G038030	1.48861	UC	O-fucosyltransferase family protein	AT1G17270 (AtOFUT5)
	HORVU1Hr1G056560	1.48574	UC	Uncharacterized protein	AT3G21070 (AtNADK1)
	HORVU4Hr1G070090	1.48393	UC	Urb2 domain containing protein	AT4G30150
	HORVU1Hr1G053740	1.48275	UC	AAI domain containing protein	AT2G45180
	HORVU6Hr1G062820	1.47827	UC	FN3 like domain containing protein	AT5G09730 (AtBXL3)
	HORVU2Hr1G030840	1.47765	UC	Dirigent protein	no
	HORVU5Hr1G020410	1.47616	UC	Uncharacterized protein	no
	HORVU4Hr1G084680	1.4715	UC	Predicted protein	AT1G62990 (AtKNAT7)
	HORVU3Hr1G094320	1.4629	UC	Nucleotid_trans domain containing protein	AT5G44820
	HORVU6Hr1G008670	1.45928	UC	EXPERA domain containing protein	AT1G05210
	HORVU5Hr1G125620	1.45795	UC	Uncharacterized protein	AT5G43310
	HORVU4Hr1G023300	1.4463	UC	Predicted protein	AT3G08600
	HORVU1Hr1G038180	1.4444	UC	Midasin	AT1G67120 (AtMDN1)
	HORVU3Hr1G006180	1.44257	UC	Uncharacterized protein	AT1G80170 (AtPG17)
	HORVU2Hr1G010010	1.44176	UC	Uncharacterized protein	AT4G39330 (AtCAD9)
	HORVU0Hr1G009120	1.43715	UC	AB hydrolase-1 domain containing protein	AT5G21950
	HORVU2Hr1G119220	1.43612	UC	Uncharacterized protein	AT5G54200
	HORVU1Hr1G005680	1.43096	UC	Galectin domain containing protein	AT5G62620 (AtB3GALT19/AtGALT6)
	HORVU2Hr1G031400	1.23823	UC	SPX domain containing protein	AT2G45130 (AtSPX3)
	HORVU2Hr1G094690	1.42765	UC	SPX domain containing protein	AT1G63010 (AtPHT5.1/AtVPT1)
	HORVU7Hr1G036920	1.4265	UC	RRM domain containing protein	no
	HORVU2Hr1G093000	1.41519	UC	Peptidase_S8 domain containing protein	AT2G19170 (AtSLP3)
	HORVU3Hr1G092280	1.40599	UC	Gnk2-homologous domain containing protein	no
	HORVU2Hr1G041110	1.40414	UC	Uncharacterized protein	no
	HORVU2Hr1G003770	1.40391	UC	Uncharacterized protein	AT5G45910 (AtGLP101/AtGELP101)
	HORVU7Hr1G042240	1.39112	UC	GSDH domain containing protein	AT1G74790 (AtHIPL1)
	HORVU6Hr1G071700	1.38933	UC	Phytocyanin domain containing protein	no
	HORVU2Hr1G100360	1.3823	UC	Uncharacterized protein	no
	HORVU1Hr1G051200	1.37917	UC	RSN1_7TM domain containing protein	AT1G32090 (AtOSCA1.8)
	HORVU4Hr1G012000	1.37509	UC	Uncharacterized protein	AT1G49450 (AtAIW2)
	HORVU6Hr1G069310	1.36719	UC	BAB01483 like protein	AT3G27960 (AtCMU2/AtKLCR2)
	HORVU2Hr1G095130	1.36714	UC	Uncharacterized protein	AT1G12740 (AtCYP87A2)
	HORVU3Hr1G067750	1.36557	UC	DUF4005 domain containing protein	AT1G74690 (AtIQD31)
	HORVU1Hr1G013210	1.32637	UC	DUF4005 domain containing protein	AT5G03040 (AtIQD2)
	HORVU5Hr1G053390	1.359	UC	Uncharacterized protein	AT4G12070
	HORVU3Hr1G049730	1.34769	UC	Uncharacterized protein	no
	HORVU2Hr1G109170	1.34764	UC	Predicted protein	AT5G25050
	HORVU2Hr1G116450	1.33409	UC	Uncharacterized protein	AT1G63380
	HORVU3Hr1G075150	1.33388	UC	Predicted protein	AT3G15810 (AtLOR12)
	HORVU6Hr1G029240	1.3276	UC	L-gulonolactone oxidase	AT5G11540 (AtGULLO3)
	HORVU1Hr1G010130	1.3218	UC	Uncharacterized protein	AT1G32780 (AtADHL3)
	HORVU1Hr1G022900	1.31281	UC	Uncharacterized protein	AT3G03050 (AtCSLD3)
	HORVU3Hr1G024400	1.30829	UC	Uncharacterized protein	AT1G80160 (AtGLXI-L7/AtGLYI7)
	HORVU5Hr1G042400	1.30479	UC	Rho-GAP domain containing protein	AT5G22400 (AtRopGAP1/AtRhoGAP10)
	HORVU0Hr1G015370	1.29916	UC	Polysacc_synt domain	AT5G67210 (AtIRX15L)
	HORVU5Hr1G067480	1.29008	UC	Uncharacterized protein	AT5G67210 (AtIRX15L)
	HORVU5Hr1G061300	1.2808	UC	BRX_domain_containing protein	AT3G14000 (AtBRX-LIKE2)
	HORVU0Hr1G019840	1.27238	UC	Uncharacterized protein	AT1G13080 (AtCYP71B2)
	HORVU2Hr1G021320	1.26554	UC	Uncharacterized protein	AT3G26760
	HORVU7Hr1G040280	1.25822	UC	Uncharacterized protein	no
	HORVU5Hr1G100800	1.25438	UC	Uncharacterized protein	no
	HORVU3Hr1G100310	1.25402	UC	Uncharacterized protein	AT1G03230 (AtSAP2)
	HORVU7Hr1G001190	1.25355	UC	PLAT domain containing protein	no
	HORVU3Hr1G085710	1.25282	UC	Uncharacterized protein	AT3G46830 (AtRAB11A)
	HORVU2Hr1G123030	1.25256	UC	C2 domain containing protein	AT1G63220 (AtPP16-2)
	HORVU3Hr1G051530	1.24737	UC	Ribosomal_TL5_C domain containing protein	AT4G23620 (AtmtRPL25a)
	HORVU4Hr1G088620	1.24615	UC	Predicted protein	AT3G60450
	HORVU4Hr1G056220	1.245	UC	Uncharacterized protein	AT3G55990 (AtESK1)
	HORVU7Hr1G038980	1.23455	UC	Uncharacterized protein	no
	HORVU4Hr1G077630	1.21993	UC	Uncharacterized protein	AT2G37560 (AtORC2)
	HORVU1Hr1G091090	1.21738	UC	Uncharacterized protein	AT3G52940 (AtFK)
	HORVU2Hr1G072040	1.21407	UC	Uncharacterized protein	no
	HORVU4Hr1G053850	1.21303	UC	Uncharacterized protein	At1g56430 (AtNAS4)
	HORVU5Hr1G061040	1.21278	UC	Uncharacterized protein	no
	HORVU5Hr1G105780	1.21276	UC	EXPERA domain containing protein	AT2G32380
	HORVU3Hr1G100060	1.20526	UC	Uncharacterized protein	AT5G38020
	HORVU5Hr1G041490	1.20391	UC	Predicted protein	AT2G46210 (AtSLD2)
	HORVU3Hr1G042140	1.19774	UC	Calponin-homology (CH) domain containing protein	AT5G48460 (AtFIM2)
	HORVU5Hr1G063470	1.1966	UC	AB hydrolase 1 domain	At1g54990 (AtAXR4)
	HORVU7Hr1G007900	1.1952	UC	Uncharacterized protein	AT3G26300 (AtCYP71B34)
	HORVU2Hr1G096360	1.19335	UC	Uncharacterized protein	AT3G26300 (AtTMP-C)
	HORVU6Hr1G059710	1.18838	UC	Thioredoxin domain containing protein	AT1G35620 (AtPDIL5-2)
	HORVU5Hr1G082760	1.18166	UC	Uncharacterized protein	no
	HORVU2Hr1G060460	1.18032	UC	Ig-like domain containing protein	AT2G34680 (AtAIR9)
	HORVU5Hr1G065330	1.17152	UC	Epimerase domain containing protein	AT1G15950 (AtCCR1)
	HORVU7Hr1G120340	1.17111	UC	Polysacc synt 4 domain	AT1G33800 (AtGXM3/AtGXMT1)
	HORVU3Hr1G111650	1.17089	UC	Uncharacterized protein	AT4G24220 (AtVEP1)
	HORVU3Hr1G116200	1.16944	UC	Very-long-chain (3R)-3-hydroxyacyl-CoA dehydratase	AT5G10480 (AtPAS2)
	HORVU2Hr1G079270	1.16835	UC	Abhydrolase_3 domain containing protein	AT5G06570 (AtCXE15)
	HORVU3Hr1G089000	1.16767	UC	AMP binding protein	AT5G63380 (AtACS9/At4CLL9)
	HORVU3Hr1G062570	1.15992	UC	Peptidase A1 domain containing protein	AT3G12700
	HORVU7Hr1G081320	1.1584	UC	Uncharacterized protein	AT4G00910 (AtALMT10)
	HORVU7Hr1G061070	1.15451	UC	Uncharacterized protein	AT1G16860 (AtSHOU4)
	HORVU3Hr1G071540	1.15216	UC	Uncharacterized protein	AT5G42660
	HORVU2Hr1G082420	1.15018	UC	Amine oxidase	AT2G42490 (AtCuAO-zeta/AtCuAO3)
	HORVU2Hr1G033470	1.1477	UC	X8 domain containing protein	no
	HORVU4Hr1G080610	1.14446	UC	Fe2OG dioxygenase domain containing protein	AT3G46080 (AtSRG1)
	HORVU6Hr1G000520	1.14395	UC	Uncharacterized protein	no
	HORVU6Hr1G064610	1.14223	UC	Uncharacterized protein	AT5G55050 (AtGLP104/AtGELP104)
	HORVU7Hr1G039360	1.14111	UC	Uncharacterized protein	AT1G60010
	HORVU7Hr1G025680	1.13641	UC	Uncharacterized protein	AT3G45680 (AtNPF2.3)
	HORVU6Hr1G087400	1.13555	UC	Uncharacterized protein	no
	HORVU2Hr1G021740	1.1345	UC	BBE domain containing protein	AT5G44400 (AtBBE26)
	HORVU6Hr1G074650	1.13163	UC	Uncharacterized protein	no
	HORVU5Hr1G116320	1.13118	UC	PUM-HD domain containing protein	At3g16810 (AtPUM24)
	HORVU6Hr1G081980	1.13027	UC	Uncharacterized protein	no
	HORVU1Hr1G037110	1.12701	UC	Uncharacterized protein	no
	HORVU3Hr1G058320	1.12212	UC	AB hydrolase-1 domain containing protein	AT1G80280
	HORVU4Hr1G085940	1.1195	UC	Diaminohydroxyphosphoribosylaminopyrimidine deaminase, EC 3.5.4.26 (HTP reductase) (Riboflavin-specific deaminase)	AT4G20960 (AtPyrD)
	HORVU7Hr1G010370	1.11897	UC	Glycosyltransferase	AT1G22360 (AtUGT85A2)
	HORVU1Hr1G064700	1.11445	UC	Beta-hexosaminidase	no
	HORVU1Hr1G051500	1.11399	UC	CASP-like protein	AT2G38480 (AtCASPL4B1)
	HORVU4Hr1G041610	1.11098	UC	Beta-ketoacyl-[acyl-carrier-protein] synthase I	AT1G74960 (AtFAB1)
	HORVU5Hr1G122280	1.10528	UC	Uncharacterized protein	no
	HORVU1Hr1G029770	1.10148	UC	DNA HELICASE	AT5G44635 (AtMCM6)
	HORVU7Hr1G040250	1.09954	UC	DDT domain containing protein	AT1G67780 (AtDDR3)
	HORVU3Hr1G024470	1.09756	UC	Uncharacterized protein	AT5G07190 (AtATS3)
	HORVU6Hr1G016750	1.09361	UC	Uncharacterized protein	no
	HORVU3Hr1G028210	1.08397	UC	SGNH_hydro domain containing protein	AT5G45920
	HORVU5Hr1G118500	1.08281	UC	Post-GPI attachment to proteins factor 3	AT1G16560 (AtPGAP3b)
	HORVU7Hr1G001070	1.06468	UC	Glyco_hydro_32N domain containing protein	AT1G62660 (AtVI1)
	HORVU7Hr1G050160	1.0604	UC	Uncharacterized protein	AT2G42320
	HORVU1Hr1G002220	1.0556	UC	Uncharacterized protein	AT5G45910 (AtGLP101/AtGELP101)
	HORVU1Hr1G008580	1.05487	UC	Uncharacterized protein	no
	HORVU6Hr1G073280	1.05395	UC	RING-type E3 ubiquitin transferase	AT1G71020 (AtPUB10)
	HORVU2Hr1G028380	1.04672	UC	Glyco_trans_2-like domain containing protein	AT5G03760 (AtCSLA09)
	HORVU6Hr1G084390	1.04323	UC	Uncharacterized protein	AT4G30440 (AtGAE1)
	HORVU1Hr1G023330	1.04101	UC	Uncharacterized protein	no
	HORVU3Hr1G017100	1.03577	UC	Uncharacterized protein	no
	HORVU5Hr1G102010	1.03195	UC	Uncharacterized protein	no
	HORVU6Hr1G005240	1.03132	UC	Uncharacterized protein	AT2G37230 (AtmL102/AtPPR5)
	HORVU7Hr1G033370	1.02951	UC	Uncharacterized protein	AT1G61790
	HORVU2Hr1G098110	1.02531	UC	Nudix hydrolase domain containing protein	AT5G47240 (AtNUDT8)
	HORVU1Hr1G076090	1.02232	UC	Uncharacterized protein	AT5G19690 (AtSTT3A)
	HORVU5Hr1G024410	1.00805	UC	Predicted protein	no
	HORVU7Hr1G104830	1.03746	UC	VARLMGL domain containing protein	no
	HORVU2Hr1G063820	1.00799	UC	VARLMGL domain containing protein	AT1G74160 (AtLNG3/AtTRM4)
	HORVU0Hr1G009870	1.00727	UC	Uncharacterized protein	AT1G74160 (AtRBL)
	HORVU2Hr1G081650	1.00072	UC	Uncharacterized protein	AT3G50660 (AtDWF4)
	HORVU2Hr1G092650	1.33372	UC	Uncharacterized protein	AT1G76880 (AtDF1)

## Sheet: Cluster R2
Category	Gene ID	Log2FC H2O2 vs. control	Log2FC LaCl3+H2O2 vs. control	Gene Name	Predicted ortholog
TFs
	HORVU1Hr1G075040	-1.00466	UC	AP2/ERF domain containing protein	no
	HORVU7Hr1G032750	-1.05564	UC	AP2/ERF domain containing protein	AT3G14230 (AtRAP2.2)
	HORVU6Hr1G062380	-1.77104	UC	AP2/ERF domain containing protein	AT3G23240 (AtERF1)
	HORVU2Hr1G093660	-2.44972	UC	AP2/ERF domain containing protein	no
	HORVU1Hr1G077680	-3.99452	UC	AP2/ERF domain containing protein	no
	HORVU6Hr1G058630	-1.34252	UC	Uncharacterized protein	AT2G31180 (AtMYB14)
	HORVU2Hr1G106180	-3.00599	UC	Uncharacterized protein	AT5G16770 (AtMYB9)
	HORVU3Hr1G060500	-1.18501	UC	WRKY domain containing protein	AT1G29860 (AtWRKY71)
	HORVU7Hr1G083270	-2.07284	UC	WRKY domain containing protein	no
	HORVU2Hr1G065750	-2.18599	UC	WRKY domain containing protein	AT4G31550 (AtWRKY11)
	HORVU3Hr1G067510	-2.71813	UC	WRKY domain containing protein	AT5G64810 (AtWRKY51)
	HORVU5Hr1G074230	-1.08711	UC	NAC domain containing protein	AT1G34180 (AtNAC016)
	HORVU3Hr1G095880	-1.17122	UC	NAC domain containing protein	no
	HORVU5Hr1G099470	-3.90197	UC	NAC domain containing protein	AT2G43000 (AtNAC042)
	HORVU1Hr1G024280	-3.13086	UC	BHLH domain containing protein	no
	HORVU7Hr1G083390	-1.7809	UC	BHLH domain containing protein	no
	HORVU5Hr1G105790	-1.5623	UC	F-box domain containing protein	no
	HORVU5Hr1G116660	-2.2308	UC	F-box domain containing protein	no
	HORVU3Hr1G085050	-1.78901	UC	Homeobox domain containing protein	no
	HORVU4Hr1G051530	-1.94576	UC	Homeobox domain containing protein	no
	HORVU4Hr1G083150	-2.10783	UC	Transcription repressor (Ovate family protein)	no
	HORVU3Hr1G016690	-1.33336	UC	LOB domain containing protein	AT5G63090 (AtASL4/AtLOB)
Cell Wall
	HORVU7Hr1G091100	-1.29072	UC	Glucan endo-1,3-beta-D-glucosidase	AT2G05790
	HORVU1Hr1G054230	-1.43134	UC	Uncharacterized protein	AT1G65680 (AtEXPB2)
	HORVU7Hr1G093680	-1.27621	UC	Expansin	AT4G38210 (AtEXPA20)
	HORVU5Hr1G115310	-1.52373	UC	Mannan endo-1,4-beta-mannosidase	AT5G66460 (AtMan7)
	HORVU1Hr1G085830	-1.92645	UC	Endoglucanase	AT1G64390 (AtGH9C2)
Heat Shock			UC
	HORVU5Hr1G061160	-1.73859	UC	SHSP domain containing protein	no
	HORVU2Hr1G024160	-1.31564	UC	Uncharacterized protein	AT2G38000 (AtDnaJE1.20)
	HORVU5Hr1G103680	-1.31052	UC	CR-type domain containing protein	AT3G44110 (AtATJ3)
Glutathione and detoxification
Glutathione	HORVU1Hr1G049230	-1.28746	UC	Glutathione transferase	AT1G10360 (AtGSTU18)
	HORVU1Hr1G021150	-1.35916	UC	Glutathione transferase	AT3G62760 (AtGSTF13)
	HORVU2Hr1G124330	-2.19251	UC	Uncharacterized protein	AT1G78370 (AtGSTU20)
	HORVU5Hr1G006330	-1.17015	UC	Glutathione transferase	no
Detoxification	HORVU5Hr1G047540	-1.71089	UC	Protein DETOXIFICATION	AT5G45275
Peroxidases
	HORVU1Hr1G020720	-1.24512	UC	Peroxidase	AT5G19890 (AtPRX59)
	HORVU3Hr1G074960	-1.35984	UC	Peroxidase	AT4G11290 (AtPRX39)
	HORVU1Hr1G075760	-1.74327	UC	Peroxidase	AT1G05260 (AtRCI3)
	HORVU1Hr1G020690	-1.75464	UC	Peroxidase	AT5G06730 (AtPRX54)
	HORVU7Hr1G089320	-2.10913	UC	Peroxidase	AT5G05340 (AtPRX52)
Phtotosynthesis
	HORVU6Hr1G016890	-1.53863	UC	Chlorophyll a-b binding protein, chloroplastic	AT2G34420 (AtLHCb1.5)
	HORVU7Hr1G046320	-1.78803	UC	Chlorophyll a-b binding protein, chloroplastic	AT3G54890 (AtLHCA1)
	HORVU6Hr1G033160	-1.1592	UC	Chlorophyll a/b binding protein	AT1G61520 (AtLHCA3)
	HORVU3Hr1G086190	-1.35931	UC	Photosystem II reaction center Psb28 protein	AT4G28660 (AtPsb28)
	HORVU2Hr1G060480	-1.81767	UC	PSI-K	AT1G30380 (AtPSAK)
	HORVU0Hr1G004670	-1.82251	UC	Uncharacterized protein	AT1G30380 (AtPsaK)
Ca2+ sensors
	HORVU3Hr1G109220	-1.27229	UC	Uncharacterized protein	AT1G76640 (AtCML39)
	HORVU5Hr1G043460	-1.02664	UC	Predicted protein	OsCML1, LOC_Os11g04560.1
	HORVU5Hr1G111520	-1.29933	UC	Calcium binding EF-hand domain containing protein	LOC_Os03g59770.1
	HORVU3Hr1G077070	-2.66052	UC	Calcium binding EF-hand domain containing protein	AT3G16420 (AtPBP1)
	HORVU1Hr1G086900	-1.71753	UC	Calmodulin-like43 (HvCML43)	no
Kinases (Diverse)
	HORVU3Hr1G070700	-1.00727	UC	Protein kinase domain containing protein	AT1G28440 (AtHSL1)
	HORVU2Hr1G093580	-1.10802	UC	Protein kinase domain containing protein	AT2G44830 (AtPAX/AtAGC1-3)
	HORVU2Hr1G036210	-1.13035	UC	Protein kinase domain containing protein	AT5G55560 (AtWNK11)
	HORVU6Hr1G079810	-1.14083	UC	Protein kinase domain containing protein	AT4G08500 (AtMEKK1)
	HORVU5Hr1G059070	-1.18149	UC	Protein kinase domain containing protein	AT1G24030 (AtPBL28)
	HORVU7Hr1G108150	-1.20962	UC	Protein kinase domain containing protein	AT2G05940 (AtPBL14/AtRIPK)
	HORVU5Hr1G001920	-1.21092	UC	Protein kinase domain containing protein	AT1G09970 (AtRLK7)
	HORVU3Hr1G055620	-1.21601	UC	Protein kinase domain containing protein	AT1G64300 (AtMLKL1)
	HORVU3Hr1G022780	-1.42505	UC	Protein kinase domain containing protein	AT5G02070 (AtWAKL20)
	HORVU5Hr1G119270	-1.35989	UC	Protein kinase domain containing protein	AT1G21230 (AtWAK5)
	HORVU4Hr1G007550	-1.40356	UC	Protein kinase domain containing protein	AT1G48480 (AtRKL1)
	HORVU7Hr1G078530	-1.43335	UC	Protein kinase domain containing protein	AT1G63500 (AtBSK7)
	HORVU2Hr1G076720	-1.44186	UC	Protein kinase domain containing protein	AT5G47850 (AtCCR4)
	HORVU4Hr1G056610	-1.44985	UC	Non-specific serine/threonine protein kinase	AT3G01090 (AtAKIN10)
	HORVU1Hr1G063610	-1.47103	UC	Protein kinase domain containing protein	AT1G11050
	HORVU6Hr1G069710	-1.50818	UC	Protein kinase domain containing protein	AT4G21390 (AtB120)
	HORVU7Hr1G089500	-1.52411	UC	Protein kinase domain containing protein	AT5G45800 (AtMEE62)
	HORVU3Hr1G064960	-1.6715	UC	Uncharacterized protein	AT2G19130 (AtGLecRK-I.2/AtSD-RLK25)
	HORVU1Hr1G061160	-2.1202	UC	Pyruvate dikinase	AT4G15530 (AtPPDK)
	HORVU3Hr1G018610	-2.25767	UC	Protein kinase domain containing protein	AT3G53810 (AtLecRK-IV.2/AtSGC)
	HORVU4Hr1G073020	-1.54664	UC	Protein kinase domain containing protein	AT4G31420 (AtREIL1)
	HORVU0Hr1G007620	-2.33388	UC	Protein kinase domain containing protein	AT4G08850 (AtLRR-KISS)
	HORVU6Hr1G032410	-2.37413	UC	Receptor-like serine/threonine-protein kinase	AT2G19130 (AtGLecRK-I.2/AtSD-RLK25)
	HORVU6Hr1G077070	-1.03015	UC	Histidine kinase	AT2G01830 (AtAHK4)
	HORVU3Hr1G094870	-1.66559	UC	Histidine kinase	AT1G27320 (AtHK3)
Transporters
	HORVU3Hr1G087860	-1.02786	UC	Uncharacterized protein	AT1G08540 (AtABC1)
	HORVU1Hr1G043890	-2.58957	UC	Uncharacterized protein	AT1G73190 (AtALPHA-TIP)
	HORVU1Hr1G092640	-1.53971	UC	Anion channel protein	AT4G27970 (AtSLAH2)
	HORVU2Hr1G046050	-1.38949	UC	WAT1 related protein	AT1G09380 (AtMtN21)
Hormones
GA3	HORVU1Hr1G023460	-2.05807	UC	Fe2OG dioxygenase domain containing protein	AT1G02400 (AtGA2OX4)
JA	HORVU7Hr1G118010	-1.42356	UC	Oxidored_FMN domain containing protein	AT1G76680 (AtOPR1)
Auxin	HORVU1Hr1G028170	-1.61739	UC	Auxin responsive protein	AT1G13750 (AtIAA26)
ABA	HORVU6Hr1G059940	-1.24505	UC	GRAM domain containing protein	AT5G23370 (AtGEML8/AtGRE8)
	HORVU4Hr1G002650	-1.06832	UC	Uncharacterized protein	AT4G11650 (AtOSM34)
Others
	HORVU2Hr1G067250	-1.00469	UC	Uncharacterized protein	no
	HORVU4Hr1G090660	-1.00699	UC	BAG domain containing protein	no
	HORVU5Hr1G022350	-1.0101	UC	Uncharacterized protein	AT2G31400 (AtGUN1)
	HORVU4Hr1G043530	-1.01156	UC	Uncharacterized protein	AT3G52430 (AtPAD4)
	HORVU2Hr1G106020	-1.01473	UC	Uncharacterized protein	AT1G32700 (AtPLATZ3)
	HORVU5Hr1G104570	-1.01549	UC	Uncharacterized protein	no
	HORVU2Hr1G088110	-1.01959	UC	Uncharacterized protein	AT2G38970
	HORVU3Hr1G053380	-1.02012	UC	Uncharacterized protein	AT1G15520 (AtPDR12)
	HORVU6Hr1G050140	-1.02135	UC	Uncharacterized protein	AT3G11100 (AtENAP1/AtVFP3)
	HORVU6Hr1G009820	-1.03055	UC	RING-type E3 ubiquitin transferase	no
	HORVU5Hr1G069990	-1.121	UC	RING-type E3 ubiquitin transferase	no
	HORVU7Hr1G047920	-1.26757	UC	RING-type E3 ubiquitin transferase	AT1G67530 (AtPUB7)
	HORVU5Hr1G092290	-1.34493	UC	RING-type domain containing protein	no
	HORVU6Hr1G034250	-2.15212	UC	RING-type domain containing protein	AT2G35930 (AtPUB23)
	HORVU7Hr1G089530	-2.50823	UC	RING-type domain containing protein	none
	HORVU1Hr1G024740	-1.07407	UC	RING-type domain containing protein	AT5G01960
	HORVU6Hr1G022590	-1.60643	UC	RING-type domain containing protein	AT3G05200 (AtATL6)
	HORVU4Hr1G059610	-1.07664	UC	RING-type domain containing protein	AT3G46510 (AtPUB13)
	HORVU3Hr1G017160	-1.65516	UC	RING-type domain containing protein	AT5G01960
	HORVU3Hr1G108930	-1.02221	UC	RING-type domain containing protein	AT5G12310
	HORVU1Hr1G054930	-1.02443	UC	Predicted protein	no
	HORVU2Hr1G071110	-1.02778	UC	Protein TSSC4	no
	HORVU5Hr1G054510	-1.03269	UC	Predicted protein	no
	HORVU1Hr1G014070	-1.03313	UC	Predicted protein	AT3G12090 (AtTET6)
	HORVU1Hr1G073150	-1.0349	UC	O-fucosyltransferase family protein	AT2G37980 (AtOFUT19)
	HORVU6Hr1G030800	-1.03659	UC	Transmembrane protein 230	AT4G29850
	HORVU1Hr1G019500	-1.03687	UC	Sucrose-phosphatase	AT2G35840 (AtSPP2)
	HORVU1Hr1G050830	-1.03919	UC	Epimerase domain containing protein	AT2G23910
	HORVU3Hr1G033410	-1.04076	UC	Uncharacterized protein	no
	HORVU5Hr1G109640	-1.04281	UC	Uncharacterized protein	no
	HORVU1Hr1G053050	-1.04297	UC	Uncharacterized protein	no
	HORVU3Hr1G096580	-1.04472	UC	Uncharacterized protein	AT1G03760 (AtURI)
	HORVU4Hr1G022170	-1.04647	UC	Uncharacterized protein	no
	HORVU1Hr1G036920	-1.05203	UC	Uncharacterized protein	no
	HORVU1Hr1G054060	-1.05413	UC	QWRf DOMAIN CONTAINING	no
	HORVU2Hr1G013730	-1.05414	UC	Phosphoinositide phospholipase C	AT2G40116 (AtPLC6)
	HORVU0Hr1G008650	-1.055	UC	Uncharacterized protein	no
	HORVU3Hr1G112690	-1.05665	UC	FYVE-type domain containing protein	AT5G42140 (AtPRAF5/AtRLD4)
	HORVU3Hr1G022340	-1.06072	UC	Predicted protein	AT3G62160
	HORVU1Hr1G068770	-1.07097	UC	Histone domain containing protein	AT1G75600 (AtHTR14)
	HORVU2Hr1G090930	-1.07098	UC	FeThRed_A domain containing protein	no
	HORVU7Hr1G077000	-1.07187	UC	Bromo domain containing protein	AT1G58025 (AtBRD5)
	HORVU1Hr1G004610	-1.0814	UC	Uncharacterized protein	no
	HORVU7Hr1G088560	-1.08533	UC	Aa_trans domain containing protein	AT1G58360 (AtAAP1)
	HORVU4Hr1G054240	-1.09215	UC	Uncharacterized protein	no
	HORVU1Hr1G038700	-1.09529	UC	Cysteinyl-tRNA synthetase	AT2G31170 (AtSYCO ARATH)
	HORVU5Hr1G087730	-1.10653	UC	Cupin type-1 domain containing protein	AT1G07750
	HORVU5Hr1G059430	-1.11538	UC	Uncharacterized protein	no
	HORVU3Hr1G064040	-1.12433	UC	Uncharacterized protein	no
	HORVU3Hr1G086380	-1.12627	UC	ENTH domain containing protein	no
	HORVU7Hr1G087250	-1.12882	UC	Uncharacterized protein	AT5G21100 (AtMCO2/AtAAO)
	HORVU1Hr1G047710	-1.13044	UC	PMEI domain containing protein	no
	HORVU7Hr1G000370	-1.1316	UC	Uncharacterized protein	AT1G29400 (AtAML5)
	HORVU3Hr1G077880	-1.13393	UC	Uncharacterized protein	no
	HORVU7Hr1G115330	-1.13586	UC	Uncharacterized protein	no
	HORVU1Hr1G016640	-1.13785	UC	Protein-serine/threonine phosphatase	AT3G62260 (AtDBP3/AtPP2C49)
	HORVU7Hr1G079460	-1.14303	UC	Predicted protein	no
	HORVU4Hr1G002770	-2.55645	UC	AAI domain containing protein	no
	HORVU1Hr1G053650	-2.08641	UC	AAI domain containing protein	no
	HORVU2Hr1G073680	-1.14347	UC	AAI domain containing protein	no
	HORVU4Hr1G017240	-1.1453	UC	Predicted protein	no
	HORVU3Hr1G057540	-1.63071	UC	AAA domain containing protein	AT3G50940
	HORVU2Hr1G046180	-1.14562	UC	AAA domain containing protein	AT3G50930 (AtBCS1)
	HORVU4Hr1G010740	-1.14732	UC	Uncharacterized protein	no
	HORVU4Hr1G054870	-1.15055	UC	Bet_v_1 domain containing protein	no
	HORVU1Hr1G054100	-1.15618	UC	Uncharacterized protein	AT4G16600 (AtPGSIP7)
	HORVU5Hr1G016600	-1.16392	UC	Uncharacterized protein	AT2G16050
	HORVU1Hr1G073330	-1.16407	UC	Uncharacterized protein	AT2G39980
	HORVU6Hr1G058840	-1.16445	UC	Phenylalanine lyase	AT2G37040 (AtPAL1)
	HORVU5Hr1G011270	-1.16547	UC	Uncharacterized protein	AT2G13290
	HORVU6Hr1G017080	-1.16721	UC	Uncharacterized protein	AT2G17140
	HORVU3Hr1G031220	-1.17073	UC	VARLMGL domain containing protein	no
	HORVU5Hr1G041250	-1.17601	UC	Predicted protein	AT5G51670
	HORVU5Hr1G013510	-1.18211	UC	Predicted protein	AT1G47290 (AtHSD1)
	HORVU4Hr1G009070	-1.18238	UC	Uncharacterized protein	no
	HORVU2Hr1G023260	-1.18375	UC	Uncharacterized protein	AT3G10320 (AtMUCI21)
	HORVU2Hr1G092900	-1.18518	UC	Uncharacterized protein	no
	HORVU4Hr1G026960	-1.18619	UC	AB hydrolase-1 domain containing protein	AT2G23610 (AtMES3)
	HORVU3Hr1G075040	-1.18859	UC	Tyrosine decarboxylase	AT2G20340 (AtAAS)
	HORVU2Hr1G070700	-1.1894	UC	Glycerophosphodiester phosphodiesterase	AT3G02040 (AtSRG3)
	HORVU3Hr1G026330	-1.19123	UC	Peptidase_S8 domain containing protein	AT4G10540 (AtSBT3.8)
	HORVU6Hr1G064740	-1.19125	UC	Aa trans domain containing protein	AT2G42005 (AtANTL1/AtAVT3b)
	HORVU7Hr1G082560	-1.1973	UC	Uncharacterized protein	AT5G24690
	HORVU0Hr1G021940	-1.20022	UC	Uncharacterized protein	AT1G64140
	HORVU5Hr1G103060	-1.20263	UC	Patatin	AT3G54950 (AtPLP7)
	HORVU2Hr1G120260	-1.20282	UC	Uncharacterized protein	no
	HORVU1Hr1G028030	-1.20858	UC	Malic enzyme	AT5G25880 (AtNADP-ME3)
	HORVU2Hr1G079610	-1.20965	UC	Uncharacterized protein	AT1G22260 (AtZYP1)
	HORVU3Hr1G027160	-1.21645	UC	Hydrolase_4 domain containing protein	AT5G11650 (AtMAGL13)
	HORVU4Hr1G067280	-1.21954	UC	hcY_DOMAIN	AT2G46110 (AtHMT1)
	HORVU2Hr1G107860	-1.22179	UC	Uncharacterized protein	AT3G21820 (AtATXR2)
	HORVU7Hr1G113350	-1.22277	UC	Epimerase domain containing protein	AT4G27250
	HORVU5Hr1G085310	-1.22282	UC	Glycosyltransferase	AT1G07250 (AtUGT71C4)
	HORVU7Hr1G093940	-1.22573	UC	Predicted protein	AT1G26390 (AtFOX2/AtBBE4)
	HORVU4Hr1G076750	-1.22691	UC	AB hydrolase-1 domain containing protein	AT2G23620 (AtMES1)
	HORVU5Hr1G079040	-1.2274	UC	Uncharacterized protein	no
	HORVU6Hr1G011510	-1.23062	UC	Histone H4	AT5G59970
	HORVU3Hr1G110350	-1.23241	UC	Bulb-type lectin domain containing protein	no
	HORVU3Hr1G065790	-1.23269	UC	Predicted protein	AT4G36470 (AtCLAMT)
	HORVU4Hr1G059950	-1.23605	UC	Predicted	no
	HORVU7Hr1G024980	-1.23844	UC	Uncharacterized protein	AT3G59140 (AtMRP14)
	HORVU5Hr1G057740	-1.24107	UC	Predicted	no
	HORVU4Hr1G005300	-1.24306	UC	Hexosyltransferase	no
	HORVU5Hr1G068770	-1.24413	UC	CDI domain containing protein	no
	HORVU5Hr1G072520	-1.24818	UC	Uncharacterized protein	AT4G20820 (AtBBE18)
	HORVU7Hr1G096660	-1.24845	UC	Histone H2A	AT3G59140 (AtHTA12)
	HORVU4Hr1G054970	-1.24853	UC	Uncharacterized protein	no
	HORVU5Hr1G105950	-1.2521	UC	Uncharacterized protein	AT4G14620
	HORVU5Hr1G074020	-1.25231	UC	Uncharacterized protein	no
	HORVU2Hr1G067350	-1.25695	UC	Exocyst Exo 70 domain containing	no
	HORVU4Hr1G068420	-1.25845	UC		AT1G26560 (AtBGLU40)
	HORVU6Hr1G012640	-1.25863	UC	Uncharacterized protein	no
	HORVU2Hr1G046550	-1.25901	UC	Uncharacterized protein	no
	HORVU7Hr1G118690	-1.26155	UC	Predicted protein	AT4G38480 (AtABD1)
	HORVU3Hr1G066810	-1.2727	UC	Cytokinin riboside 5'-monophosphate phosphoribohydrolase	no
	HORVU6Hr1G076730	-1.28039	UC	Predicted protein	no
	HORVU4Hr1G078690	-1.28141	UC	Uncharacterized protein	no
	HORVU4Hr1G061340	-1.28612	UC	Predicted	no
	HORVU2Hr1G112170	-1.29107	UC	Uncharacterized protein	no
	HORVU3Hr1G056580	-1.29239	UC	Uncharacterized protein	no
	HORVU3Hr1G018980	-1.29421	UC	Uncharacterized protein	no
	HORVU4Hr1G021650	-1.29711	UC	TF-B3 domain containing protein	AT2G36080 (AtNGAL1)
	HORVU4Hr1G063690	-1.29902	UC	Uncharacterized protein	AT1G20030
	HORVU2Hr1G080890	-1.30635	UC	GATase domain containing protein	AT1G25220 (AtASB1)
	HORVU7Hr1G091800	-1.30802	UC	CR-type domain containing protein	AT5G39150
	HORVU7Hr1G008170	-1.32379	UC	NB-ARC domain containing protein	AT3G07040 (AtRPM1)
	HORVU7Hr1G044210	-1.3238	UC	Uncharacterized protein	no
	HORVU7Hr1G118720	-1.32782	UC	Uncharacterized protein	AT1G11320
	HORVU5Hr1G098300	-1.33663	UC	Predicted protein	AT3G50780
	HORVU7Hr1G112900	-1.33926	UC	Uncharacterized protein	AT4G30850 (AtHHP2)
	HORVU1Hr1G090870	-1.35146	UC	Fe2OG dioxygenase domain containing protein	AT1G52820
	HORVU2Hr1G075610	-1.3518	UC	Uncharacterized protein	AT2G38740 (AtSgPP)
	HORVU6Hr1G079030	-1.35723	UC	Lipocln_cytosolic_FA-bd_dom domain containing protein	AT5G58070 (AtTIL)
	HORVU2Hr1G001810	-1.3584	UC	YTH domain containing protein	AT1G55500 (AtECT4)
	HORVU4Hr1G002710	-1.3673	UC	N-acetyltransferase domain containing protein	AT2G32030
	HORVU7Hr1G079160	-1.36797	UC	Lectin_legB domain containing protein	no
	HORVU5Hr1G079660	-1.37481	UC	UDPGT domain containing protein	AT2G43840 (AtUGT74F1)
	HORVU5Hr1G050570	-1.37717	UC	CBS domain containing protein	AT4G36910 (AtLEJ2)
	HORVU7Hr1G030310	-1.38436	UC	C2 tensin type domain	AT5G07740 (AtFH20)
	HORVU6Hr1G063800	-1.38858	UC	Uncharacterized protein	AT3G57880 (AtMCTP3/AtFTIP3)
	HORVU5Hr1G085520	-1.38898	UC	Uncharacterized protein	AT1G76150 (AtECH2)
	HORVU3Hr1G008400	-1.39102	UC	Reticulon-like protein	AT3G18260 (AtRTNLB9)
	HORVU3Hr1G052710	-1.39728	UC	CCHC-type domain containing protein	AT5G47390 (AtKUA1)
	HORVU1Hr1G051360	-1.3985	UC	Cupin_3 domain containing protein	AT2G32650
	HORVU2Hr1G118700	-1.40128	UC	Uncharacterized protein	AT4G21720
	HORVU6Hr1G059970	-1.4042	UC	Uncharacterized protein	AT5G23370 (AtGEML8/AtGRE8)
	HORVU6Hr1G076340	-1.40514	UC	Uncharacterized protein	AT3G18170
	HORVU7Hr1G083180	-1.40569	UC	Uncharacterized protein	AT1G13380
	HORVU0Hr1G023150	-1.41873	UC	Uncharacterized protein	no
	HORVU3Hr1G013280	-1.42542	UC	Uncharacterized protein	no
	HORVU3Hr1G077660	-1.42578	UC	NTF domain	AT1G27970 (AtNTF2B)
	HORVU6Hr1G085730	-1.4261	UC	Peptidase_S9 domain containing protein	AT4G31020 (AtABAPT8)
	HORVU3Hr1G095340	-1.42976	UC	DUF4408 domain containing protein	no
	HORVU4Hr1G063660	-1.43198	UC	Glycosyltransferase	AT3G02100 (AtUGT83A1)
	HORVU4Hr1G003470	-1.43303	UC	Uncharacterized protein	no
	HORVU2Hr1G112280	-1.4376	UC	Uncharacterized protein	AT5G10510 (AtAIL6)
	HORVU4Hr1G046810	-1.43766	UC	Uncharacterized protein	no
	HORVU5Hr1G101990	-1.441	UC	Uncharacterized protein	no
	HORVU2Hr1G072750	-1.4417	UC	Centroradialis	no
	HORVU2Hr1G019990	-1.44465	UC	C2 domain containing protein	no
	HORVU1Hr1G008360	-1.44528	UC	Laccase	AT3G09220 (AtLAC7)
	HORVU3Hr1G000580	-1.45271	UC	HD domain containing protein	AT5G40270 (AtVEN4)
	HORVU4Hr1G053780	-1.45599	UC	Uncharacterized protein	AT2G16760
	HORVU4Hr1G061440	-1.46003	UC	Uncharacterized protein	AT2G01080 (AtNHL15)
	HORVU6Hr1G028850	-1.46847	UC	T-SNARE coiled homology domain containing protein	no
	HORVU4Hr1G085480	-1.48488	UC	Uncharacterized protein	AT5G35525 (AtPCR3/AtFWL2)
	HORVU1Hr1G078160	-1.49153	UC	Zeta toxin domain containing protein	AT1G06750
	HORVU4Hr1G019610	-1.50068	UC	Uncharacterized protein	AT1G77580 (AtFPP1/AtVETH3)
	HORVU1Hr1G057460	-1.50118	UC	NMO domain containing protein	AT5G64250 (AtNPDO)
	HORVU7Hr1G050660	-1.50281	UC	Lipoxygenase domain containing protein	no
	HORVU2Hr1G092750	-1.50319	UC	Predicted protein	no
	HORVU7Hr1G054610	-1.50677	UC	ACT domain containing protein	AT1G69040 (AtACR4)
	HORVU6Hr1G067740	-1.51285	UC	Uncharacterized protein	AT1G17070 (AtNTR1)
	HORVU7Hr1G029920	-1.51295	UC	Uncharacterized protein	no
	HORVU4Hr1G010490	-1.52025	UC	Uncharacterized protein	no
	HORVU7Hr1G011230	-1.52152	UC	Predicted protein	no
	HORVU1Hr1G083700	-1.53165	UC	Hexosyltransferase	AT5G57500
	HORVU4Hr1G021370	-1.53193	UC	Clp R domain containing protein	AT3G52490 (AtSMXL3)
	HORVU7Hr1G075710	-1.53538	UC	Phosphoribosylanthranilate isomerase	AT1G07780 (AtPAI1)
	HORVU4Hr1G085990	-1.53872	UC	Uncharacterized protein	AT3G22060 (AtCRRSP38)
	HORVU1Hr1G085240	-1.55862	UC	Uncharacterized protein	AT1G68390
	HORVU3Hr1G009360	-1.56488	UC	Non specific lipid transfer protein	no
	HORVU4Hr1G089560	-1.58498	UC	Predicted protein	no
	HORVU1Hr1G091130	-1.58856	UC	Flavin-containing monooxygenase	AT1G62620
	HORVU1Hr1G051580	-1.59249	UC	Uncharacterized protein	AT1G63830
	HORVU1Hr1G042250	-1.59985	UC	DEP domain containing protein	AT3G11920
	HORVU3Hr1G094730	-1.60404	UC	SBP-type domain containing protein	no
	HORVU7Hr1G036100	-1.6225	UC	Laccase	AT5G09360 (AtLAC14)
	HORVU4Hr1G052320	-1.63033	UC	VQ domain containing protein	no
	HORVU5Hr1G025950	-1.63485	UC	Uncharacterized protein	AT1G56120
	HORVU5Hr1G087800	-1.63539	UC	Nudix hydrolase domain containing protein	AT2G42070 (AtNUDT23)
	HORVU2Hr1G099550	-1.64633	UC	Uncharacterized protein	AT4G13840 (AtCER26/AtCER2-L1)
	HORVU3Hr1G051330	-1.65012	UC	Uncharacterized protein	AT1G34000 (AtOHP2)
	HORVU3Hr1G019820	-1.65139	UC	CP-type G domain containing protein	no
	HORVU5Hr1G007910	-1.65372	UC	CP-type G domain containing protein	AT1G08410 (AtLSG1-2/AtDIG6)
	HORVU5Hr1G071010	-1.6538	UC	FAS1 domain containing protein	AT5G55730 (AtFLA1)
	HORVU2Hr1G098160	-1.6567	UC	Uncharacterized protein	no
	HORVU7Hr1G054520	-1.65783	UC	Uncharacterized protein	no
	HORVU7Hr1G096250	-1.66156	UC	NAD(P)-bd_dom domain containing protein	AT1G16720 (AtHCF173)
	HORVU3Hr1G006930	-1.66246	UC	Predicted protein	no
	HORVU1Hr1G039720	-1.67214	UC	c2h2 TYPE	AT5G46050 (AtPTR3)
	HORVU0Hr1G016180	-1.678	UC	Cupin_3 domain containing protein	AT4G10300
	HORVU3Hr1G098730	-1.69318	UC	LRRNT_2 domain containing protein	AT5G06860 (AtPGIP1)
	HORVU1Hr1G090730	-1.69605	UC	3-ketoacyl-CoA synthase	AT2G26640 (AtKCS11)
	HORVU3Hr1G116220	-1.70049	UC	Dof-type domain containing protein	AT3G55370 (AtOBP3)
	HORVU3Hr1G050810	-1.70108	UC	Uncharacterized protein	no
	HORVU1Hr1G083910	-1.708	UC	Uncharacterized protein	AT3G03980
	HORVU3Hr1G020780	-1.71479	UC	Seed imbibition protein	AT3G56950 (AtSIP2)
	HORVU5Hr1G088920	-1.7377	UC	NADPH--cytochrome P450 reductase, CPR, P450R	AT4G30210 (AtATR2)
	HORVU4Hr1G072360	-1.7379	UC	FAD_binding_3 domain containing protein	AT4G38540
	HORVU6Hr1G058340	-1.74034	UC	ALOG domain containing protein	AT2G31160 (AtLSH3)
	HORVU2Hr1G013870	-1.7426	UC	FA_desaturase domain containing protein	AT5G05580 (AtFAD8)
	HORVU2Hr1G028670	-1.75064	UC	Uncharacterized protein	no
	HORVU0Hr1G000760	-1.75625	UC	BOWMAN_BIRK domain containing protein	no
	HORVU5Hr1G093410	-1.75721	UC	Uncharacterized protein	AT3G22800 (AtLRX6)
	HORVU7Hr1G056600	-1.76306	UC	Predicted protein	AT4G22980
	HORVU5Hr1G111040	-1.76971	UC	Glycosyltransferase	AT5G49690 (AtUGT91C1)
	HORVU2Hr1G122620	-1.77378	UC	Phytocyanin domain containing protein	no
	HORVU2Hr1G104390	-1.77964	UC	Ubiquitin	AT3G52590 (AtUBQ1)
	HORVU4Hr1G063790	-1.78374	UC	GH10 domain containing protein	AT4G38650
	HORVU1Hr1G041960	-1.79023	UC	Uncharacterized protein	no
	HORVU5Hr1G007730	-1.79666	UC	NB-ARC domain containing protein	AT3G07040 (AtRPM1)
	HORVU7Hr1G091880	-1.80666	UC	Uncharacterized protein	no
	HORVU5Hr1G014110	-1.80828	UC	Uncharacterized protein	no
	HORVU6Hr1G009280	-1.81089	UC	Uncharacterized protein	no
	HORVU7Hr1G115360	-1.81136	UC	Uncharacterized protein	no
	HORVU3Hr1G091020	-1.81247	UC	Aa trans domain containing protein	AT5G09220 (AtAAP2)
	HORVU0Hr1G003270	-1.81338	UC	Uncharacterized protein	AT5G09220 (AtAAP2)
	HORVU4Hr1G028780	-1.82592	UC	Uncharacterized protein	no
	HORVU5Hr1G042370	-1.83072	UC	Uncharacterized protein	no
	HORVU4Hr1G076330	-1.84025	UC	Uncharacterized protein	AT5G21930 (AtHMA8/AtPAA2)
	HORVU7Hr1G072960	-1.84144	UC	Lipase_3 domain containing protein	AT4G16820 (AtPLA1-I-beta2/AtDALL1)
	HORVU6Hr1G076980	-1.84987	UC	Ubiquitin-like domain containing protein	AT3G52590 (AtUBQ1)
	HORVU5Hr1G077640	-1.86777	UC	Uncharacterized protein	no
	HORVU2Hr1G122630	-1.88548	UC	Uncharacterized protein	no
	HORVU3Hr1G117440	-1.88743	UC	Uncharacterized protein	no
	HORVU3Hr1G069720	-1.92077	UC	Uncharacterized protein	AT3G16520 (AtUGT88A1)
	HORVU1Hr1G061380	-1.94252	UC	TAXi_C domain containing protein	AT1G03220 (AtSAP1)
	HORVU5Hr1G081260	-1.95811	UC	Uncharacterized protein	AT3G48300 (AtCYP71A23)
	HORVU2Hr1G028310	-1.95863	UC	Uncharacterized protein	no
	HORVU1Hr1G084520	-1.96458	UC	2Fe-2S ferredoxin-type domain containing protein	AT3G53960 (AtNPF5.7)
	HORVU7Hr1G118770	-1.97563	UC	Dirigent protein	no
	HORVU1Hr1G014200	-1.98858	UC	Uncharacterized protein	no
	HORVU0Hr1G038820	-1.99776	UC	60S acidic ribosomal protein P0	AT2G40010 (AtRPP0a)
	HORVU7Hr1G075130	-1.9984	UC	Uncharacterized protein	no
	HORVU7Hr1G073350	-2.01607	UC	Predicted protein	AT2G32300 (AtUCC1)
	HORVU7Hr1G046760	-2.02376	UC	Uncharacterized protein	no
	HORVU1Hr1G065660	-2.02599	UC	BOWMAN_BIRK domain containing protein	no
	HORVU3Hr1G081170	-2.03603	UC	Non specific lipid transfer protein	no
	HORVU0Hr1G017790	-2.04462	UC	NB-ARC domain containing protein	no
	HORVU3Hr1G026690	-2.05037	UC	Predicted protein	no
	HORVU5Hr1G109290	-2.0512	UC	Uncharacterized protein	AT2G44310
	HORVU4Hr1G008070	-2.06138	UC	Uncharacterized protein	no
	HORVU4Hr1G038810	-2.08347	UC	Uncharacterized protein	no
	HORVU4Hr1G069970	-2.09423	UC	Cyclin N terminal domain containing
	HORVU7Hr1G113480	-2.13976	UC	N-acetyltransferase domain containing protein	AT2G23060
	HORVU2Hr1G092070	-2.17195	UC	Uncharacterized protein	no
	HORVU2Hr1G029290	-2.19461	UC	Trehalose 6-phosphate phosphatase	AT2G22190 (AtTPPE)
	HORVU2Hr1G114220	-2.19519	UC	Uncharacterized protein	no
	HORVU4Hr1G076940	-2.2	UC	FAE domain containing	AT2G26250 (AtFDH)
	HORVU2Hr1G014020	-2.20499	UC	Dirigent protein	no
	HORVU4Hr1G058560	-2.20581	UC	Uncharacterized protein	no
	HORVU5Hr1G022960	-2.21579	UC	DUF629 domain containing protein	no
	HORVU2Hr1G076490	-2.21775	UC	Uncharacterized protein	no
	HORVU5Hr1G073710	-2.23036	UC	Uncharacterized protein	no
	HORVU2Hr1G032330	-2.24087	UC	Sulfotransferase	AT1G18590 (AtSOT17)
	HORVU1Hr1G043580	-2.24225	UC	MATH domain containing protein	no
	HORVU5Hr1G042330	-2.24227	UC	Uncharacterized protein	no
	HORVU2Hr1G071330	-2.27045	UC	Diadenosine tetraphosphate synthetase	AT1G29880 (AtGlyRS)
	HORVU6Hr1G066420	-2.29126	UC	Uncharacterized protein	AT5G48930 (AtHCT)
	HORVU4Hr1G079990	-2.30525	UC	Glycosyltransferase	AT1G22360 (AtUGT85A2)
	HORVU2Hr1G067700	-2.31909	UC	Uncharacterized protein	no
	HORVU2Hr1G096880	-2.32201	UC	UDPGT domain containing protein	AT2G15490 (AtUGT73B4)
	HORVU2Hr1G079810	-2.32206	UC	Predicted protein	no
	HORVU5Hr1G103770	-2.33013	UC	Abhydrolase_3 domain containing protein	AT5G06570 (AtCXE15)
	HORVU2Hr1G011690	-2.33265	UC	Uncharacterized protein	AT4G08850 (AtMIK2/AtLRR-KISS)
	HORVU4Hr1G045210	-2.33868	UC	Uncharacterized protein	AT2G36000 (AtmTERF3)
	HORVU4Hr1G089890	-2.37109	UC	Uncharacterized protein	no
	HORVU2Hr1G012980	-2.37521	UC	Uncharacterized protein	AT3G26280 (AtCYP71B4)
	HORVU6Hr1G006860	-2.38069	UC	Uncharacterized protein	no
	HORVU4Hr1G027610	-2.3837	UC	Uncharacterized protein	AT2G29060 (AtSCL33)
	HORVU1Hr1G076590	-2.39311	UC	PP28 domain containing protein	no
	HORVU3Hr1G033610	-2.403	UC	Uncharacterized protein	no
	HORVU1Hr1G088550	-2.42132	UC	Uncharacterized protein	no
	HORVU5Hr1G086520	-2.43303	UC	Cytokinin riboside 5'-monophosphate phosphoribohydrolase	AT4G35190 (AtLOG5)
	HORVU2Hr1G065000	-2.4341	UC	Predicted protein	no
	HORVU1Hr1G019750	-2.46388	UC	Laccase	AT3G09220 (AtLAC7)
	HORVU0Hr1G019630	-2.46392	UC	Glycosyltransferase	AT4G34131 (AtUGT73B3)
	HORVU3Hr1G026050	-2.46482	UC	Uncharacterized protein	no
	HORVU4Hr1G079620	-2.47334	UC	Predicted protein	AT2G26170 (AtMAX1)
	HORVU7Hr1G084610	-2.50845	UC	3-ketoacyl-CoA synthase	AT2G26640 (AtKCS11)
	HORVU4Hr1G011420	-2.5302	UC	PPR_long domain containing protein	AT4G31850 (AtPGR3)
	HORVU2Hr1G104120	-2.55274	UC	Uncharacterized protein	no
	HORVU2Hr1G012270	-2.55598	UC	WS_DGAT_C domain containing protein	AT1G05675 (AtUGT74E1)
	HORVU5Hr1G020500	-2.57455	UC	Uncharacterized protein	no
	HORVU2Hr1G044940	-2.6289	UC	Rx_N domain containing protein	AT2G03200
	HORVU2Hr1G003070	-2.6306	UC	Rx_N domain containing protein	no
	HORVU1Hr1G082820	-2.6526	UC	Uncharacterized protein	no
	HORVU3Hr1G064680	-2.7363	UC	Plug translocon domain containing	AT2G34250
	HORVU5Hr1G073650	-2.74241	UC	Uncharacterized protein	no
	HORVU2Hr1G013940	-2.75408	UC	Dirigent protein	no
	HORVU5Hr1G080680	-2.77475	UC	Uncharacterized protein	no
	HORVU6Hr1G077670	-2.7962	UC	Uncharacterized protein	AT4G08980 (AtFBW2)
	HORVU4Hr1G081180	-2.80816	UC	Uncharacterized protein	AT5G17540
	HORVU5Hr1G044390	-2.8414	UC	Uncharacterized protein	AT5G48930 (AtHCT)
	HORVU3Hr1G104200	-2.86126	UC	eRF1_1 domain containing protein	AT5G47880 (AtERF1-1)
	HORVU3Hr1G105400	-2.86532	UC	Uncharacterized protein	AT4G16260
	HORVU3Hr1G071370	-2.87482	UC	Phytocyanin domain containing protein	AT5G53870 (AtENODL1)
	HORVU3Hr1G010390	-3.11822	UC	Uncharacterized protein	AT3G16520 (AtUGT88A1)
	HORVU0Hr1G022690	-3.17195	UC	Rhodanese domain containing protein	AT3G45590 (AtSEN1)
	HORVU3Hr1G030970	-3.19932	UC	Uncharacterized protein	AT1G09310 (AtSVB2/AtSVBL)
	HORVU4Hr1G007220	-3.25246	UC	Phytocyanin domain containing protein	no
	HORVU5Hr1G110090	-3.31158	UC	Uncharacterized protein	no
	HORVU7Hr1G030830	-3.41432	UC	Uncharacterized protein	no
	HORVU7Hr1G116310	-3.58823	UC	Uncharacterized protein	AT3G14650 (AtCYP72A11)
	HORVU2Hr1G014870	-3.62121	UC	Uncharacterized protein	no
	HORVU6Hr1G070550	-3.91067	UC	Uncharacterized protein	AT3G12120 (AtFAD2)
	HORVU2Hr1G104220	-3.97974	UC	Germin-like protein	AT5G39160
	HORVU5Hr1G067760	-4.39382	UC	Uncharacterized protein	Uncharacterized protein
	HORVU5Hr1G073690	-4.47466	UC	Uncharacterized protein	no
	HORVU5Hr1G106020	-4.50678	UC	SCP domain containing protein	AT3G19690
	HORVU6Hr1G070540	-5.12895	UC	Uncharacterized protein	AT3G12120 (AtFAD2)
	HORVU1Hr1G063510	-1.35305	UC	FAD binding mono-oxygenase	AT4G30720 (AtTCD5/AtSG3)
	HORVU2Hr1G088760	-1.16178	UC	Uncharacterized protein	AT2G33380 (AtPXG3)
	HORVU7Hr1G099070	-1.5431	UC	Zinc finger domain containing	AT4G31420 (AtREIL1)

## Sheet: Cluster R3
Category	Gene ID	Log2FC H2O2 vs. control	Log2FC LaCl3+H2O2 vs. control	Functional annotation	Predicted ortholog in A.thaliana
TFs
	HORVU1Hr1G082310	1.29579	-1.81027	AP2/ERF domain containing protein	no
	HORVU5Hr1G068450	1.60648	-1.71331	AP2/ERF domain containing protein	no
	HORVU5Hr1G080420	1.51327	-2.02281	AP2/ERF domain containing protein	no
	HORVU5Hr1G080450	1.93638	-2.06937	AP2/ERF domain containing protein	no
	HORVU5Hr1G080790	1.27853	-1.08137	AP2/ERF domain containing protein	no
	HORVU6Hr1G065430	1.23842	-1.1747	AP2/ERF domain containing protein	no
	HORVU1Hr1G016420	1.9643	-0.905087	Uncharacterized protein	AT1G48000 (AtMYB112)
	HORVU1Hr1G074260	1.05619	-1.17017	Uncharacterized protein	AT4G38620 (AtMYB4)
	HORVU1Hr1G079030	1.82642	-1.62949	HTH myb-type domain containing protein	AT5G26660 (AtMYB86)
	HORVU3Hr1G025030	2.51956	-1.7534	HTH myb-type domain containing protein	no
	HORVU3Hr1G056980	2.30655	-2.12868	Predicted protein	AT3G27810 (AtMYB21)
	HORVU5Hr1G034830	1.5409	-1.69152	WRKY domain containing protein	no
	HORVU5Hr1G056130	1.18571	-1.33443	WRKY domain containing protein	no
	HORVU7Hr1G113830	1.19855	-1.38116	WRKY domain containing protein	AT4G31800 (AtWRKY18)
	HORVU7Hr1G113850	1.10739	-1.37954	WRKY domain containing protein	AT1G80840 (AtWRKY40)
	HORVU1Hr1G029180	1.63121	-1.06653	LEA_2 domain containing protein	no
	HORVU5Hr1G118060	2.0981	-2.0872	LEA_2 domain containing protein	no.
	HORVU2Hr1G066080	1.42297	-1.28009	LOB domain containing protein	AT3G02550 (AtLBD41)
	HORVU3Hr1G016320	1.5771	-1.82348	LOB domain containing protein	AT3G02550 (AtLBD41)
	HORVU2Hr1G066100	1.50001	-1.22594	Uncharacterized protein	AT5G57150 (AtbHLH035)
	HORVU3Hr1G000150	1.26155	-1.26364	BHLH domain containing protein	no
	HORVU5Hr1G093960	1.56572	-1.11012	BHLH domain containing protein	AT3G23100 (AtXRCC4)
Cell Wall
	HORVU3Hr1G004920	1.87987	-2.03813	Expansin	AT1G20190 (AtEXPA11)
	HORVU3Hr1G076670	1.60808	-1.1909	Expansin	AT4G01630 (AtEXPA17)
	HORVU4Hr1G028720	2.70723	-1.7676	Xyloglucan endotransglucosylase/hydrolase	AT5G13870 (AtXTH5)
	HORVU7Hr1G098440	1.48186	-1.29911	Xyloglucan endotransglucosylase/hydrolase	AT5G57560 (AtXTH22)
	HORVU6Hr1G013670	1.37968	-1.0365	Cellulose synthase	AT4G32410 (AtCESA1)
	HORVU6Hr1G050750	1.54012	-1.22752	Cellulose synthase	AT5G05170 (AtCESA3)
Peroxidases
	HORVU3Hr1G038290	2.28484	-1.04185	Peroxidase	AT5G64120 (AtPRX71)
	HORVU7Hr1G039570	2.21914	-1.39316	Peroxidase	AT1G05260 (AtPRX52)
Hormones
JA	HORVU4Hr1G076850	1.16746	-1.84623	TIFY domain containing protein	no
	HORVU5Hr1G062290	1.36511	-1.10989	TIFY domain containing protein	no
	HORVU7Hr1G041230	1.55923	-1.8245	TIFY domain containing protein	no
	HORVU5Hr1G042030	1.32671	-1.35627	Predicted protein	AT2G27690 (AtCYP94C1)
ABA	HORVU0Hr1G016780	1.44284	-1.33275	Uncharacterized protein	AT4G19230 (AtCYP707A1)
GA3	HORVU3Hr1G056100	2.11623	-1.86166	Uncharacterized protein	AT3G14680 (AtCYP72A14)
Ca2+ signalling
Ca2+ sensor	HORVU1Hr1G057410	1.09248	-1.07704	Uncharacterized protein	AT1G24620 (AtCML25)
Ca2+ -associated kinases	HORVU1Hr1G078710	1.58036	-1.12717	Protein kinase domain containing protein	AT2G32510 (AtMAPKKK17)
	HORVU1Hr1G078860	1.72655	-1.75205	Protein kinase domain containing protein	AT2G32510 (AtMAPKKK17)
	HORVU3Hr1G065610	1.34513	-1.53352	Uncharacterized protein	AT4G26890 (AtMAPKKK16)
	HORVU3Hr1G065630	1.24971	-1.46059	Protein kinase domain containing protein	AT4G26890 (AtMAPKKK16)
	HORVU1Hr1G088510	1.41726	-2.29259	Mitogen-activated protein kinase	AT2G42880 (AtMPK20)
	HORVU1Hr1G070840	1.99046	-2.2143	Protein kinase domain containing protein	AT3G51850 (AtCPK13)
Other kinases
	HORVU1Hr1G019770	1.85286	-1.71224	Protein kinase domain containing protein	AT2G05940 (AtPBL14)
	HORVU5Hr1G011940	1.371	-1.39762	Protein kinase domain containing protein	AT4G14350 (AtNDR1) )
Others
	HORVU4Hr1G008870	1.08082	-1.01566	Uncharacterized protein	AT5G66750 (AtDDM1)
	HORVU3Hr1G019430	1.04493	-1.09729	Aminotran_1_2 domain containing protein	AT4G26200 (AtACS7)
	HORVU4Hr1G078400	1.06215	-1.0999	Uncharacterized protein	no
	HORVU4Hr1G075410	1.16717	-1.00657	Uncharacterized protein	no
	HORVU4Hr1G056770	1.03498	-1.2553	Glycosyltransferases	AT2G37090 (AtIRX9)
	HORVU2Hr1G087010	1.28356	-1.01107	Uncharacterize protein	no
	HORVU3Hr1G108630	1.19819	-1.12642	Uncharacterized protein	no
	HORVU3Hr1G058810	1.34916	-1.00091	PMR5N domain containing protein	AT1G29050 (AtTBL38)
	HORVU3Hr1G019440	1.1896	-1.18324	Uncharacterized protein	AT5G56750 (AtNDL1)
	HORVU7Hr1G089240	1.03976	-1.3306	Predicted protein	no
	HORVU5Hr1G108610	1.29455	-1.10304	Procollagen-proline 4-dioxygenase	AT3G28480 (AtP4H7)
	HORVU5Hr1G084700	1.00518	-1.40637	Predicted protein	no
	HORVU2Hr1G084640	1.27355	-1.193	Lipase_3 domain containing protein	AT1G05790
	HORVU7Hr1G039180	1.23071	-1.28108	Predicted protein	AT3G28150 (AtTBL22)
	HORVU6Hr1G077750	1.20121	-1.34309	Predicted protein	AT4G08950 (AtEXO)
	HORVU5Hr1G073970	1.37024	-1.21702	3-hydroxy-3-methylglutaryl coenzyme A reductase	AT1G76490 (AtHMG1)
	HORVU5Hr1G009350	1.27971	-1.31517	Kinesin motor domain containing protein	AT3G20150 (AtKIN12f)
	HORVU7Hr1G105620	1.20003	-1.42688	Uncharacterized protein	AT1G76160 (Atsks5)
	HORVU0Hr1G017160	1.39669	-1.25138	Glutaredoxin domain containing protein	AT5G39865 (AtDnaJE2.10)
	HORVU1Hr1G060530	1.43364	-1.28131	Uncharacterized protein	AT5G18860 (AtNSH3)
	HORVU1Hr1G055470	1.5207	-1.18173	Uncharacterized protein	AT2G44740 (AtCYCP4;1)
	HORVU7Hr1G093080	1.34661	-1.38495	Uncharacterized protein	no
	HORVU5Hr1G072760	1.02502	-1.65313	Uncharacterized protein	AT1G50590 (AtPRN4)
	HORVU0Hr1G032410	1.29493	-1.51831	Uncharacterized protein	no
	HORVU6Hr1G059500	1.28419	-1.56936	Glycosyltransferase	AT3G22250 (AtUGT82A1)
	HORVU2Hr1G105090	1.72536	-1.67851	FLZ-type domain containing protein	no
	HORVU2Hr1G105140	1.48458	-1.39514	FLZ-type domain containing protein	no
	HORVU1Hr1G094490	1.1706	-1.68272	Cysteine dioxygenase	AT5G15120 (AtPCO1)
	HORVU6Hr1G025830	1.3098	-1.58225	Predicted protein	no
	HORVU2Hr1G094230	1.27387	-1.62419	Aminotran_1_2 domain containing protein	AT4G11280 (AtACS6)
	HORVU7Hr1G053260	1.48193	-1.45544	NAD(P)-bd_dom domain containing protein	AT3G23820 (AtGAE6)
	HORVU4Hr1G003590	1.29407	-1.62962	Hexosyltransferase	AT3G50760 (AtGATL2)
	HORVU4Hr1G056210	1.53351	-1.41869	Protein-serine/threonine phosphatase	AT2G30020
	HORVU1Hr1G048700	1.42868	-1.56295	Predicted protein	AT3G61060 (AtPP2A13)
	HORVU4Hr1G072340	1.38833	-1.73652	FAD_binding_3 domain containing protein	AT5G05320
	HORVU2Hr1G001820	1.28939	-1.90109	Flavin-containing monooxygenase	AT4G28720 (AtYUC8)
	HORVU3Hr1G000690	1.0056	-2.0649	Uncharacterized protein	no
	HORVU7Hr1G099580	1.72293	-1.55363	Uncharacterized protein	no
	HORVU3Hr1G097400	1.58965	-1.69103	Uncharacterized protein	no
	HORVU6Hr1G028220	1.80577	-1.45581	Uncharacterized protein	AT3G46710 (AtRPP13L2)
	HORVU6Hr1G077780	1.15035	-2.01785	Uncharacterized protein unassigned	AT4G08950 (AtEXO)
	HORVU7Hr1G037350	1.67255	-1.64363	Phosphoglycerate mutase (2,3-diphosphoglycerate-dependent) unassigned	AT1G22170 (AtGPMA1)
	HORVU2Hr1G116800	1.53963	-1.76938	Uncharacterized protein unassigned	no
	HORVU7Hr1G106790	1.73494	-1.61436	Predicted protein unassigned	no
	HORVU7Hr1G040590	1.71208	-1.64546	Hexosyltransferase unassigned	AT1G70090 (AtLGT8)
	HORVU1Hr1G026850	1.83533	-1.52532	Uncharacterized protein unassigned ortholog	no
	HORVU5Hr1G098360	1.56395	-1.85494	Predicted protein unassigned	no
	HORVU5Hr1G016780	1.35264	-2.10126	Uncharacterized protein	no
	HORVU7Hr1G121570	2.02085	-1.69508	RING-type domain containing protein	no
	HORVU2Hr1G093960	1.31011	-2.15338	RING-type domain containing protein	no
	HORVU4Hr1G050510	1.91724	-1.75407	Uncharacterized protein	no
	HORVU1Hr1G082470	1.81738	-1.87579	Uncharacterized protein	no
	HORVU2Hr1G038040	1.46828	-2.17915	Uncharacterized protein	no
	HORVU4Hr1G009800	1.55855	-2.16946	Aminotran_1_2 domain containing protein	AT5G38120 (AtACS8)
	HORVU6Hr1G086770	2.40899	-1.14392	Uncharacterized protein	no
	HORVU3Hr1G097390	1.58036	-2.21553	Uncharacterized protein	no
	HORVU3Hr1G066500	2.18771	-1.8392	Uncharacterized protein	no
	HORVU0Hr1G002390	2.22481	-1.79517	Uncharacterized protein	no
	HORVU1Hr1G047430	2.00497	-2.06599	Uncharacterized protein	no
	HORVU1Hr1G074790	1.77771	-2.25673	Uncharacterized protein	no
	HORVU4Hr1G005810	2.40909	-1.63036	WD_REPEATS_REGION domain containing protein	AT3G27640
	HORVU3Hr1G097460	2.30276	-1.82662	Uncharacterized protein	no.
	HORVU7Hr1G096800	1.9017	-2.30541	L-lactate dehydrogenase	AT4G17260 (AtLDH1)
	HORVU5Hr1G013590	1.85821	-2.44506	Uncharacterized protein	no
	HORVU5Hr1G080820	1.99682	-2.37271	Uncharacterized protein	no
	HORVU7Hr1G035480	1.7859	-2.55004	Lipase_3 domain containing protein	AT5G42930
	HORVU6Hr1G001150	1.83037	-2.68616	Predicted protein	no
	HORVU2Hr1G094780	2.32591	-2.41267	Uncharacterized protein	no
	HORVU3Hr1G107550	2.70162	-2.06784	Uncharacterized	no
	HORVU4Hr1G087760	1.36064	-1.03609	AAI domain containing protein	no
	HORVU2Hr1G029480	1.3562	-0.840481	AAI domain containing protein	no
	HORVU1Hr1G000700	2.66996	-2.44162	AAI domain containing protein	no
	HORVU5Hr1G077670	3.07779	-1.79774	Uncharacterized protein	no
	HORVU3Hr1G011360	2.48085	-2.83011	Uncharacterized protein	no
	HORVU1Hr1G005150	2.25528	-3.31267	Uncharacterized protein	no
	HORVU5Hr1G077650	3.44108	-2.20779	Uncharacterized protein	no
	HORVU5Hr1G013640	3.24719	-2.85374	Uncharacterized protein	no
	HORVU3Hr1G087310	3.22606	-3.32805	Uncharacterized protein	no
	HORVU0Hr1G017000	1.11455	-0.898198	Predicted protein	AT1G52820
	HORVU1Hr1G093390	1.12267	-0.928364	TPR_REGION domain containing protein	AT1G53300 (AtTL1)
	HORVU7Hr1G101580	1.26406	-0.92733	Uncharacterized protein	no
	HORVU3Hr1G021190	1.31479	-0.916071	Uncharacterized protein	AT3G10040
	HORVU2Hr1G116740	1.59867	-0.939001	Uncharacterized protein	no

## Sheet: Cluster R4
Category	Gene ID	Log2FC H2O2 v.s control	Log2FC LaCl3+H2O2 vs. control	Functional annotation	Predicted ortholog in A.thaliana
TFs
	HORVU2Hr1G098140	-2.68241	2.73538	AP2/ERF domain containing protein	no
	HORVU5Hr1G018720	-2.32491	2.5798	AP2/ERF domain containing protein	no
	HORVU0Hr1G001430	-3.03939	1.69677	WRKY domain containing protein	AT5G26170 (AtWRKY50)
	HORVU1Hr1G027700	-2.94675	2.06711	WRKY domain containing protein	AT5G26170 (AtWRKY50)
	HORVU1Hr1G080300	-3.92656	2.55848	WRKY domain containing protein	no
	HORVU1Hr1G088300	-2.34487	1.69153	WRKY domain containing protein	AT1G29860 (AtWRKY71)
	HORVU3Hr1G020140	-3.07156	2.46303	WRKY domain containing protein	AT5G26170 (AtWRKY50)
	HORVU2Hr1G106190	-3.21651	1.85058	Uncharacterized protein	AT5G16770 (AtMYB9)
	HORVU1Hr1G008810	-1.15305	1.00807	Uncharacterized protein	AT5G59780 (AtMYB59-3)
	HORVU2Hr1G017240	-2.10054	2.00821	HTH myb-type domain containing protein	AT5G18240 (AtMYBR1)
	HORVU3Hr1G010620	-1.00946	1.00729	HTH myb-type domain containing protein	no
	HORVU7Hr1G003490	-2.43291	2.29817	HTH myb-type domain containing protein	AT5G16770 (AtMYB9)
	HORVU3Hr1G038700	-2.53986	1.44924	Uncharacterized protein	AT1G69560 (AtMYB105)
	HORVU7Hr1G072670	-1.98104	1.95494	NAC domain containing protein	no
	HORVU3Hr1G095240	-1.493	0.929197	MADS-box domain containing protein	no
	HORVU5Hr1G059410	-1.0617	0.92117	Homeobox domain containing protein	AT3G01470 (AtHB-1)
	HORVU5Hr1G059410	-1.0617	0.92117	Homeobox domain containing protein	AT3G01470 (AtHB-1)
	HORVU5Hr1G040310	-1.48517	1.56522	Transcription repressor	no
	HORVU4Hr1G008980	-1.21259	1.77906	GRAS domain containing protein	AT5G66770 (AtSCL4)
	HORVU4Hr1G027900	-2.70808	2.10267	GRAS domain containing protein	AT1G07530 (AtGRAS2)
	HORVU5Hr1G020900	-2.45063	1.73882	GRAS domain containing protein	AT1G07530 (AtGRAS2)
	HORVU2Hr1G108480	-1.3004	1.3885	BHLH domain containing protein	AT1G61660 (AtbHLH112)
	HORVU3Hr1G018680	-2.05798	1.83346	BHLH domain containing protein	no
	HORVU6Hr1G068980	-2.68995	2.33961	BHLH domain containing protein	AT4G34530 (AtCIB1)
	HORVU7Hr1G084240	-3.00824	2.21528	BZIP domain containing protein	no
	HORVU3Hr1G084360	-2.68896	2.51406	BZIP domain containing protein	no
	HORVU7Hr1G036130	-1.4296	1.8682	K-box domain containing protein	no
	HORVU3Hr1G058150	-2.36656	1.49996	F-box domain containing protein	AT5G19970
	HORVU3Hr1G072260	-1.66592	1.42093	Uncharacterized protein	AT1G28520 (AtVOZ1)
Cell wall
	HORVU1Hr1G069830	-3.99892	3.31265	Expansin	AT1G69530 (AtEXPA1)
	HORVU7Hr1G098370	-1.55213	3.31887	Xyloglucan endotransglucosylase/hydrolase	AT4G25810 (AtXTR6)
	HORVU1Hr1G051020	-1.44328	1.24299	Uncharacterized protein	AT1G14720 (AtXTR2)
	HORVU3Hr1G091360	-2.57515	2.18069	Pectinesterase	AT5G09760 (AtPME51)
	HORVU4Hr1G068960	-1.3926	1.26388	Glucan endo-1,3-beta-D-glucosidase	no
	HORVU2Hr1G044450	-2.36145	2.00126	Glucan endo-1,3-beta-D-glucosidase	AT5G55180
Glutathione and detoxification
Glutathione
	HORVU3Hr1G117390	-3.72796	3.44898	Glutathione transferase	AT3G62760 (AtGSTF13)
	HORVU1Hr1G021140	-1.36118	0.731162	Glutathione transferase	AT3G62760 (AtGSTF13)
	HORVU1Hr1G021160	-2.11738	1.94024	Glutathione transferase	AT3G62760 (AtGSTF13)
	HORVU1Hr1G049100	-3.54444	2.95313	Uncharacterized protein	AT1G10360 (AtGSTU18)
	HORVU2Hr1G124320	-2.08851	2.06644	Uncharacterized protein	AT1G78380 (AtGSTU18)
	HORVU5Hr1G103430	-3.05604	1.928	Uncharacterized protein	AT1G78380 (AtGSTU18)
Detoxification	HORVU7Hr1G008830	-2.66344	2.10259	Unknown protein	AT1G10360 (AtGSTU18)
	HORVU0Hr1G022350	-4.09263	2.24627	Protein DETOXIFICATION	AT5G52450 (AtDTX16)
	HORVU6Hr1G091840	-3.01229	3.66943	Protein DETOXIFICATION	AT4G00350 (AtDTX34)
	HORVU2Hr1G068090	-2.93426	1.65068	Protein DETOXIFICATION	AT5G52450 (AtDTX16)
	HORVU3Hr1G097770	-1.50283	2.32001	HMA domain containing protein	no
	HORVU3Hr1G114920	-2.11797	1.63362	HMA domain containing protein	no
	HORVU4Hr1G046610	-1.92365	1.39604	HMA domain containing protein	no
	HORVU4Hr1G085090	-1.91634	1.3198	HMA domain containing protein	AT4G10465(AtHIPP44)
	HORVU4Hr1G046610	-1.92365	1.39604	HMA domain containing protein	no
	HORVU6Hr1G009000	-1.79518	2.66578	HMA domain containing protein	AT5G66110 (AtHIPP27)
	HORVU7Hr1G100230	-1.07148	1.37248	HMA domain containing protein	no
	HORVU2Hr1G118080	-2.18873	2.39215	HMA domain containing protein	no
	HORVU2Hr1G029270	-2.0896	1.67146	Uncharacterized protein	AT1G22990 (AtHIPP22)
Heat shock
	HORVU4Hr1G015170	-3.21943	2.72771	SHSP domain containing protein	AT4G10250 (AtHSP22.0)
	HORVU4Hr1G060760	-2.8861	2.65554	SHSP domain containing protein	AT1G53540 (AtHSP17.6c)
	HORVU3Hr1G020520	-2.96842	2.3405	SHSP domain containing protein	AT5G12020 (AtHSP17.6II)
	HORVU3Hr1G020490	-2.79792	2.47887	SHSP domain containing protein	AT5G12020 (AtHSP17.6II)
	HORVU2Hr1G077710	-1.5918	2.32007	SHSP domain containing protein	AT4G10250 (AtHSP22.0)
	HORVU4Hr1G063350	-1.77968	2.05329	SHSP domain containing protein	AT4G27670 (AtHSP21)
	HORVU7Hr1G036470	-1.46228	1.07874	SHSP domain containing protein	no
	HORVU7Hr1G036540	-2.06959	1.47373	SHSP domain containing protein	no
	HORVU4Hr1G056070	-1.75043	2.19789	J domain containing protein	AT3G08970 (AtERDJ3A)
	HORVU2Hr1G005170	-3.08384	3.23756	Unknown protein	AT5G52640 (AtHSP81-1)
	HORVU3Hr1G071120	-1.83887	1.35628	Clp R domain containing protein	AT1G74310 (AtHSP101)
	HORVU4Hr1G060720	-1.34108	1.48864	Predicted protein	AT3G46230 (AtHSP17.4)
	HORVU4Hr1G067430	-2.7388	2.86173	Unknown protein	AT2G32120 (AtHSP70T-2)
Anti-oxidant enzymes
	HORVU4Hr1G057170	-1.31063	1.2503	L-ascorbate peroxidase	AT1G07890 (AtAPX1)
	HORVU1Hr1G020800	-2.63843	2.87821	Peroxidase	AT5G19890 (AtPRX59)
	HORVU2Hr1G113070	-3.18265	2.24123	Unknown protein	AT5G05340 (AtPRX52)
	HORVU4Hr1G022270	-1.9767	1.90324	Peroxidase	AT5G05340 (AtPRX52)
	HORVU4Hr1G022280	-2.15683	1.77472	Peroxidase	AT5G05340 (AtPRX52)
	HORVU6Hr1G008640	-2.55828	2.53592	Catalase	AT1G20630 (AtCAT1)
Photosynthesis
	HORVU2Hr1G036960	-1.62443	1.19388	Chlorophyll a-b binding protein, chloroplastic	AT3G61470 (AtLHCA2)
	HORVU2Hr1G040780	-2.42063	1.50418	Chlorophyll a-b binding protein, chloroplastic	AT5G54270 (AtLHCB3)
	HORVU2Hr1G079920	-1.95508	1.30955	Chlorophyll a-b binding protein, chloroplastic	AT1G15820 (AtLHCB6)
	HORVU4Hr1G015260	-1.04733	1.16048	Chlorophyll a-b binding protein, chloroplastic	AT4G10340 (AtLHCB5)
	HORVU5Hr1G082420	-2.12593	1.70908	Chlorophyll a-b binding protein, chloroplastic	AT3G27690 (AtLHCB2.4.)
	HORVU5Hr1G051010	-1.53	1.55342	Unknown protein	AT1G67090 (AtRBCS-1A/AtS1A)
	HORVU5Hr1G050990	-1.5341	1.7469	Ribulose bisphosphate carboxylase small subunit	AT1G67090 (AtRBCS-1A/AtS1A)
	HORVU6Hr1G085170	-1.78033	1.80797	Photosystem II 10 kDa polypeptide, chloroplastic	AT1G79040 (AtPSBR)
	HORVU2Hr1G073370	-2.20401	1.3924	Uncharacterized protein	AT1G08380 (AtPSAO)
	HORVU2Hr1G057700	-2.28671	2.1691	Predicted protein	AT3G50820 (AtPSBO2)
	HORVU5Hr1G100140	-2.07055	1.41963	PSI-F	AT1G31330 (AtPSAF)
	HORVU2Hr1G041610	-1.69883	1.69158	Plastoquinol--plastocyanin reductase	AT4G03280 (AtPGR1)
	HORVU7Hr1G000900	-1.42355	1.39291	Plastocyanin	AT1G20340 (AtDRT112)
	HORVU5Hr1G063620	-2.93882	2.71928	Predicted protein	AT3G22840 (AtELIP1)
Kinases (Diverse)
	HORVU5Hr1G122950	-4.60676	3.22968	Protein kinase domain containing protein	AT3G47570
	HORVU7Hr1G019400	-2.85482	2.16978	Protein kinase domain containing protein	AT2G37710 (AtRLK)
	HORVU7Hr1G019390	-2.87381	2.00693	Protein kinase domain containing protein	AT2G37710 (AtRLK)
	HORVU2Hr1G110230	-2.37241	2.496	Protein kinase domain containing protein	AT4G33950 (AtSnRK2-6)
	HORVU3Hr1G007590	-1.55453	1.77153	Protein kinase domain containing protein	AT1G25390 (AtLRK10L-1.1/AtLRK10L4)
	HORVU7Hr1G050240	-1.91515	1.38458	Protein kinase domain containing protein	AT1G51170 (AtAGC2-3/AtUCN)
	HORVU6Hr1G001160	-1.24387	1.90097	Uncharacterized protein	AT5G55830 (AtLECRK-S.7)
	HORVU7Hr1G091520	-1.91866	1.05483	Protein kinase domain containing protein	no
	HORVU6Hr1G038700	-1.54141	1.33505	Protein kinase domain containing protein	AT3G47570
	HORVU3Hr1G099770	-1.37966	1.57364	4-methyl-5-beta-hydroxyethylthiazole kinase	AT3G24030 (AtHETK)
	HORVU2Hr1G107760	-1.31971	1.61442	Phosphatidylinositol 4-phosphate 5-kinase	AT3G09920 (AtPIP5K9)
	HORVU7Hr1G033170	-1.57367	1.35561	Inositol-tetrakisphosphate 1-kinase	AT5G16760 (AtITPK1)
	HORVU4Hr1G026160	-1.34894	1.41296	Receptor-like serine/threonine-protein kinase	AT1G34300 (AtGLecRK-I.1/AtSD-RLK7)
	HORVU4Hr1G082140	-1.29386	1.07854	Protein kinase domain containing protein	AT1G20650 (AtPBL21)
	HORVU3Hr1G038000	-1.39445	0.968925	Protein kinase domain containing protein	AT1G28390
	HORVU1Hr1G083370	-1.02796	0.997536	Thymidine kinase	no
	HORVU7Hr1G094240	-1.15547	0.789618	Ribose-phosphate diphosphokinase	AT2G35390 (AtPRS1)
	HORVU7Hr1G049580	-2.37128	2.12781	Protein kinase domain containing protein	AT1G21240 (AtWAK3)
	HORVU6Hr1G058290	-2.45065	1.79632	Uncharacterized protein	AT1G21230 (AtWAK5)
	HORVU7Hr1G029750	-1.53167	1.57484	Protein kinase domain containing protein	AT1G79570 (AtRAF20)
	HORVU1Hr1G092250	-2.28608	3.21931	Uncharacterized protein	AT4G05200 (AtCRK25)
	HORVU2Hr1G044510	-1.07682	1.08108	Uncharacterized protein	AT4G21410 (AtCRK29)
	HORVU3Hr1G113210	-2.07203	1.92913	Protein kinase domain containing protein	AT4G23160 (AtCRK8)
	HORVU7Hr1G099320	-1.19629	1.30576	Protein kinase domain containing protein	AT4G23280 (AtCRK20)
	HORVU4Hr1G062440	-1.82769	1.50084	Phosphoenolpyruvate carboxykinase (AtP)	AT4G37870 (AtPCK1)
Transporters
	HORVU7Hr1G107400	-2.34738	1.94546	Potassium transporter	AT2G30070 (AtKT1P)
	HORVU2Hr1G018190	-1.878	1.34082	Potassium transporter	AT2G40540 (AtKT2)
	HORVU1Hr1G028920	-1.64713	1.57397	Uncharacterized protein	AT1G10970 (AtZIP4)
	HORVU7Hr1G054710	-2.54648	1.91518	Bidirectional sugar transporter SWEET	AT5G50790 (AtSWEET10)
	HORVU6Hr1G089540	-2.0192	1.55804	Bidirectional sugar transporter SWEET	AT3G48740 (AtSWEET1)
	HORVU7Hr1G030160	-1.07629	1.05278	Bidirectional sugar transporter SWEET	AT5G13170 (AtSWEET15)
	HORVU3Hr1G024210	-1.56868	2.073	Uncharacterized protein	AT3G13080 (AtABCC3)
	HORVU7Hr1G014870	-1.54179	1.79257	ABC transporter domain containing protein	AT1G31770 (AtABCG14)
	HORVU5Hr1G110220	-3.63888	3.01579	H(+)/Pi cotransporte	AT3G54700 (AtPHT1;7)
	HORVU2Hr1G045480	-2.53519	1.79047	WAT1-related protein	AT5G64700 (AtUMAMIT21)
Hormones
ABA	HORVU2Hr1G078840	-1.33099	1.1889	Zeaxanthin epoxidase, chloroplastic	AT5G67030 (AtABA1)
Oxylipin synthesis	HORVU5Hr1G001180	-1.44027	3.18561	Lipoxygenase	AT3G45140 (AtLOX2)
	HORVU1Hr1G001950	-1.53096	0.913591	Oxidored_FMN domain containing protein	AT1G76680 (AtOPR1)
Others
	HORVU4Hr1G050120	-5.23297	3.72947	Predicted protein	no
	HORVU6Hr1G087220	-5.12436	3.59729	PKS_ER domain containing protein	AT4G37970 (AtCAD6)
	HORVU3Hr1G016900	-4.36489	2.25582	Uncharacterized protein	no
	HORVU6Hr1G056570	-3.53791	3.64015	Lipocln_cytosolic_FA-bd_dom domain containing protein	AT5G58070 (AtTIL)
	HORVU2Hr1G102100	-3.46201	3.70146	AAI domain containing protein	no
	HORVU2Hr1G102110	-3.18593	3.19007	AAI domain containing protein	no
	HORVU7Hr1G026570	-3.39074	2.85187	AAI domain containing protein	no
	HORVU4Hr1G087800	-3.02442	3.09917	AAI domain containing protein	no
	HORVU5Hr1G104680	-3.06201	1.52511	AAI domain containing protein	no
	HORVU4Hr1G087780	-1.94493	2.45768	AAI domain containing protein	AT1G62510
	HORVU2Hr1G102050	-1.8465	1.97539	AAI domain containing protein	no, only in brachypodium
	HORVU0Hr1G016430	-1.60156	1.10548	AAI domain containing protein	no
	HORVU3Hr1G093350	-3.78321	3.2894	Methanethiol oxidase	AT4G14030 (AtSBP1)
	HORVU2Hr1G026820	-3.72557	3.27368	Uncharacterized	AT4G01870
	HORVU7Hr1G054530	-3.11014	3.7714	Predicted protein	no
	HORVU5Hr1G021610	-3.69364	3.22368	CASP-like protein	no
	HORVU6Hr1G071920	-2.13546	4.1404	Uncharacterized protein	AT2G22900 (AtGT7/AtMUCI10/AtMAGT1)
	HORVU6Hr1G074060	-3.92471	2.53834	Uncharacterized protein	AT5G13930 (AtCHS)
	HORVU1Hr1G089730	-3.4892	3.22834	Iron-sulfur cluster assembly protein Unassigned	AT4G22220 (AtISU1)
	HORVU3Hr1G024660	-3.9695	2.2977	Abhydrolase_3 domain containing protein	AT5G06570
	HORVU2Hr1G017420	-2.26471	3.88784	Predicted protein	AT2G39050 (AtEULS3)
	HORVU5Hr1G117830	-3.46791	3.00406	Uncharacterized protein	no
	HORVU7Hr1G083530	-3.62031	2.70679	Uncharacterized protein	AT3G14820 (AtGLP66/AtGELP66)
	HORVU3Hr1G016890	-3.88925	1.83768	Uncharacterized protein	no
	HORVU2Hr1G099470	-3.06244	3.32208	Uncharacterized protein	no
	HORVU1Hr1G088620	-3.09833	3.19625	Uncharacterized protein	AT1G03230 (AtSAP2)
	HORVU0Hr1G009390	-3.56414	2.44772	Unknown protein	AT5G39110
	HORVU1Hr1G092630	-3.50055	2.57284	Uncharacterized protein	no
	HORVU4Hr1G010940	-3.7265	1.99343	Eukaryotic translation initiation factor 3 subunit G	AT3G11400 (AtEIF3G1)
	HORVU4Hr1G087840	-3.63127	2.17151	Uncharacterized protein	no
	HORVU1Hr1G093760	-3.24555	2.86798	AAA domain containing protein	AT3G50940
	HORVU7Hr1G098220	-1.2212	1.86569	AAA domain containing protein	AT3G28580
	HORVU1Hr1G063390	-1.44728	1.56701	Predicted protein	AT5G40010 (AtAATP1)
	HORVU3Hr1G003860	-2.91104	3.19252	Aspergillus nuclease S(1)	no
	HORVU0Hr1G000840	-3.48542	2.30292	BOWMAN_BIRK domain containing protein unassigned	no
	HORVU2Hr1G007570	-3.47012	2.33462	Methyltransf_11 domain containing protein unassigned	AT2G41380
	HORVU7Hr1G091080	-2.65219	3.2296	Bulb-type lectin domain containing protein	no
	HORVU5Hr1G104800	-3.38164	2.30198	N-acetyltransferase domain containing protein unassigned	AT2G32030
	HORVU4Hr1G007190	-3.43591	2.15552	Phytocyanin domain containing protein	no
	HORVU3Hr1G080500	-2.5445	3.22397	Uncharacterized protein unassigned orthologs	AT2G30750 (AtCYP71A12)
	HORVU3Hr1G078380	-2.87019	2.93389	Uncharacterized protein	no
	HORVU0Hr1G018970	-3.16898	2.45953	Uncharacterized protein	no
	HORVU2Hr1G078570	-2.59572	2.99942	Aldo_ket_red domain containing protein	AT1G59960
	HORVU3Hr1G093270	-1.79292	3.39608	Cysteine proteinase inhibitor unassigned	no
	HORVU1Hr1G092290	-2.46705	3.07765	Uncharacterized protein	no
	HORVU7Hr1G013170	-3.00395	2.56473	Predicted protein	AT1G21430 (AtYUC11)
	HORVU7Hr1G044160	-3.07587	2.46062	Predicted protein	no
	HORVU4Hr1G018100	-2.66733	2.91993	Predicted protein	no
	HORVU6Hr1G067920	-2.4991	3.02728	Uncharacterized protein	AT1G62200 (AtNPF8.5/AtPTR6)
	HORVU5Hr1G047150	-3.20703	2.10849	UDP-glucosyltransferase UGT13248	AT1G05680 (AtUGT74E2)
	HORVU6Hr1G034730	-3.12872	2.23758	Predicted protein	no
	HORVU3Hr1G006450	-2.70289	2.79155	Peptidase A1 domain containing protein	no
	HORVU0Hr1G002480	-3.14435	2.15214	Uncharacterized protein	no
	HORVU6Hr1G095380	-2.71959	2.65805	Uncharacterized protein	AT2G21280 (AtGC1)
	HORVU5Hr1G027980	-2.53832	2.78345	CASP-like protein	no
	HORVU1Hr1G085260	-2.90346	2.37615	Uncharacterized protein	AT1G68390
	HORVU6Hr1G075270	-3.18649	1.83105	Uncharacterized protein	no
	HORVU3Hr1G117650	-1.77197	3.1956	Uncharacterized protein	no
	HORVU2Hr1G104080	-2.42173	2.84264	Uncharacterized protein	no
	HORVU4Hr1G014590	-2.36285	2.80285	Uncharacterized protein	AT5G67550
	HORVU6Hr1G081570	-2.93653	2.14683	DUF4408 domain containing protein	no
	HORVU1Hr1G090890	-2.72293	2.42962	Predicted protein	no
	HORVU3Hr1G035680	-3.07979	1.60097	Predicted protein	AT5G24860 (AtFPF1)
	HORVU7Hr1G107210	-3.13591	1.35752	Glycosyltransferase	AT2G15490 (AtUGT73B4)
	HORVU2Hr1G021920	-2.22717	2.73471	PDZ domain containing protein	AT2G32480 (AtARASP)
	HORVU1Hr1G079290	-2.31913	2.656	Unknown protein	no
	HORVU3Hr1G091800	-2.27488	2.63781	Uncharacterized protein	AT5G50260 (AtCEP1)
	HORVU3Hr1G059030	-1.91901	2.84027	Predicted protein	no
	HORVU5Hr1G066260	-3.02228	1.3779	Predicted protein	no
	HORVU4Hr1G015670	-2.77161	1.9598	PHD domain containing protein	AT1G33420
	HORVU5Hr1G119550	-1.93674	2.76739	LRRNT_2 domain containing protein	no
	HORVU3Hr1G084210	-2.2457	2.52162	Ferredoxin	AT2G27510 (AtFD3)
	HORVU2Hr1G117940	-2.61419	2.12155	Uncharacterized protein	no
	HORVU1Hr1G005280	-2.24851	2.49898	Uncharacterized protein	no
	HORVU1Hr1G022660	-2.40855	2.33769	Uncharacterized protein	AT4G23890 (AtNdhS/AtCRR31)
	HORVU3Hr1G068140	-2.49798	2.2328	STAS domain containing protein	AT5G19600 (AtSULTR3.5)
	HORVU6Hr1G059930	-2.5005	2.20339	TCP domain containing protein	no
	HORVU1Hr1G019380	-2.71594	1.87118	Uncharacterized protein	AT5G48930 (AtHCT/AtHST)
	HORVU7Hr1G090560	-2.54221	2.08997	Unknown protein	AT4G37970 (AtCAD6)
	HORVU6Hr1G036800	-2.3851	2.27512	Uncharacterized protein	AT1G15520 (AtPDR12)
	HORVU3Hr1G032440	-2.49157	2.14947	Predicted protein	AT2G20570 (AtGLK1)
	HORVU4Hr1G008550	-2.5043	2.11965	Hydrolase_4 domain containing protein	AT1G73480 (AtMAGL4)
	HORVU7Hr1G035400	-2.56415	2.03485	Uncharacterized protein	no
	HORVU5Hr1G034340	-2.04633	2.54351	Uncharacterized protein	no
	HORVU7Hr1G108830	-2.38077	2.24768	Uncharacterized protein	AT5G20620 (AtUBQ4)
	HORVU6Hr1G031700	-2.66579	1.82663	Uncharacterized protein	AT1G31040 (AtPLATZ5)
	HORVU4Hr1G016190	-2.47316	2.10919	Ribosomal_L16 domain containing protein	AT1G66580 (AtRPL10C)
	HORVU7Hr1G008820	-2.56317	1.98201	Uncharacterized protein	AT2G16800 (AttZN1/AtCGF2/AtNiCo)
	HORVU6Hr1G063480	-2.70122	1.69056	PALP domain containing protein	AT3G04940 (AtCYS-D1)
	HORVU3Hr1G095700	-1.49827	2.75596	Uncharacterized protein	AT4G25110 (AtMC1)
	HORVU3Hr1G088190	-1.57147	2.71721	Uncharacterized protein	no
	HORVU4Hr1G002600	-2.32439	2.17817	Predicted protein	no
	HORVU3Hr1G092520	-2.54999	1.87823	Uncharacterized protein	no
	HORVU2Hr1G022160	-2.29789	2.2047	Lactamase_B domain containing protein	AT4G33540
	HORVU5Hr1G081610	-2.47725	1.92358	Uncharacterized protein	no
	HORVU1Hr1G046630	-2.64644	1.62236	Valyl-tRNA synthetase	AT1G14610 (AtWN2)
	HORVU7Hr1G043690	-2.59612	1.70324	Uncharacterized protein	AT3G16520 (AtUGT88A1)
	HORVU1Hr1G065600	-2.12108	2.2899	BOWMAN_BIRK domain containing protein	no
	HORVU0Hr1G013900	-2.26623	2.13121	(S)-2-hydroxy-acid oxidase	AT3G14415 (AtGOX2)
	HORVU7Hr1G088670	-2.52005	1.78788	Uncharacterized protein	no
	HORVU5Hr1G094490	-1.72932	2.53733	Uncharacterized protein	AT1G03070
	HORVU7Hr1G088510	-1.77823	2.50451	Aa_trans domain containing protein	AT1G58360(AtNAT1)
	HORVU0Hr1G005160	-2.69975	1.36989	Beta_elim_lyase domain containing protein	AT1G08630 (AtLFG4)
	HORVU3Hr1G026890	-2.32175	2.02456	Uncharacterized protein	AT3G15350
	HORVU7Hr1G093210	-2.17445	2.17146	Uncharacterized protein	no
	HORVU4Hr1G083070	-2.4374	1.84827	Predicted protein	no
	HORVU2Hr1G105930	-2.31491	1.99277	Uncharacterized protein	no
	HORVU6Hr1G077120	-2.39411	1.87416	RING-type E3 ubiquitin transferase	AT5G37490 (AtPUB21)
	HORVU0Hr1G022270	-1.59633	1.06954	RING-CH-type domain containing protein	AT5G60580 (no name)
	HORVU3Hr1G091480	-1.69317	1.33298	RING-type domain containing protein	AT2G17730 (AtNIP1)
	HORVU5Hr1G079910	-2.14675	1.87734	RING-type domain containing protein	no
	HORVU7Hr1G040480	-2.32658	1.95973	Uncharacterized protein	AT1G20960 (AtBRR2a/AtDExH12)
	HORVU1Hr1G002170	-1.85189	2.40049	Knot1 domain containing protein	no
	HORVU2Hr1G065120	-2.40267	1.84295	Predicted protein	AT5G01410 (AtPDX1)
	HORVU3Hr1G108950	-2.20811	2.06561	Uncharacterized protein	no
	HORVU6Hr1G084310	-2.13078	2.13451	Unknown protein	no
	HORVU4Hr1G019570	-1.91584	2.29194	Fructose-bisphosphate aldolase	AT4G38970 (AtFBA2)
	HORVU3Hr1G085460	-2.58377	1.41416	Unknown protein	AT2G37970 (AtSOUL1)
	HORVU4Hr1G016010	-2.22868	1.94601	Unknown protein	AT3G07040 (AtRPM1)
	HORVU5Hr1G069090	-2.19824	1.96699	Abhydrolase_3 domain containing protein	AT1G47480 (AtCXE2)
	HORVU7Hr1G107310	-2.03875	2.11782	Uncharacterized protein	AT2G06040
	HORVU3Hr1G080440	-2.34718	1.74483	Uncharacterized protein	AT2G38640 (AtLOR8)
	HORVU4Hr1G043650	-1.97923	2.163	Rubredoxin-like domain containing protein	no
	HORVU3Hr1G004140	-1.65511	2.34237	Bowman-Birk type trypsin inhibitor	no
	HORVU4Hr1G082700	-2.29733	1.70835	Glyceraldehyde-3-phosphate dehydrogenase	AT3G26650 (AtGAPA3)
	HORVU4Hr1G088860	-2.04598	2.01515	Uncharacterized protein	AT1G64650 (AtGOSAMT1/AtMOT2.2)
	HORVU2Hr1G040680	-1.9137	2.09514	Unknown protein	no
	HORVU3Hr1G069730	-2.03532	1.97705	Unknown protein	AT3G16520 (AtUGT88A1)
	HORVU3Hr1G034980	-2.02129	1.98094	Lipase_3 domain containing protein	AT1G02660 (AtPLIP2)
	HORVU2Hr1G007070	-1.9552	2.02106	Amino_oxidase domain containing protein	AT3G23510
	HORVU5Hr1G000520	-2.22846	1.66823	Uncharacterized protein	no
	HORVU1Hr1G083920	-2.16651	1.73116	Unknown protein	AT4G10770 (AtOPT7)
	HORVU7Hr1G007540	-2.23366	1.62292	Uncharacterized protein	no
	HORVU3Hr1G110440	-1.76707	2.11266	Uncharacterized protein	no
	HORVU2Hr1G122470	-1.63807	2.19656	Abhydrolase_2 domain containing protein	AT4G22300 (AtSOBER1)
	HORVU3Hr1G037780	-1.93821	1.93654	Uncharacterized protein	no
	HORVU2Hr1G087090	-1.9355	1.89676	Adenine phosphoribosyltransferase	AT1G80050 (AtPT2)
	HORVU0Hr1G008950	-2.31402	1.3368	Branched-chain-amino-acid aminotransferase	AT3G49680 (AtBCAT3)
	HORVU7Hr1G015740	-1.83709	1.9702	Unknown protein	no
	HORVU7Hr1G040860	-2.29713	1.36046	Predicted protein	no
	HORVU1Hr1G069800	-2.2875	1.37813	Non-specific lipid-transfer protein	no
	HORVU3Hr1G109160	-2.09402	1.66983	Uncharacterized protein	AT2G26870 (AtNPC2)
	HORVU0Hr1G016130	-1.81981	1.95191	Uncharacterized protein	no
	HORVU3Hr1G082460	-1.66183	2.07991	Uncharacterized protein	AT1G22540 (AtNPF5.10)
	HORVU5Hr1G087980	-2.04919	1.66425	Uncharacterized protein	no
	HORVU4Hr1G085590	-1.89347	1.84488	Predicted protein	AT1G04110 (AtSDD1)
	HORVU1Hr1G028900	-2.22552	1.36896	Uncharacterized protein	AT5G57010
	HORVU5Hr1G111280	-1.99015	1.70161	Uncharacterized protein	no
	HORVU7Hr1G106960	-1.79712	1.87932	ALOG domain containing protein	AT3G23290 (AtLSH4)
	HORVU3Hr1G074100	-1.79891	1.87053	Phytocyanin domain containing protein	no
	HORVU2Hr1G118100	-1.61524	2.02269	Uncharacterized protein	no
	HORVU7Hr1G115810	-1.75492	1.87351	Hydrophob_seed domain containing protein	no
	HORVU1Hr1G057680	-1.71866	1.89097	Uncharacterized protein	no
	HORVU5Hr1G074030	-2.29096	1.07287	Uncharacterized protein	no
	HORVU4Hr1G000950	-2.08893	1.45006	Predicted protein	AT1G03940
	HORVU3Hr1G019720	-1.98509	1.59119	TauD domain containing protein	AT3G21360
	HORVU1Hr1G018350	-1.81504	1.77749	Uncharacterized protein	no
	HORVU6Hr1G088580	-2.0678	1.4507	Predicted protein	AT5G60710
	HORVU1Hr1G086910	-2.28252	1.03189	Uncharacterized protein	no
	HORVU6Hr1G019870	-1.84378	1.72772	Uncharacterized protein	AT4G04480
	HORVU2Hr1G014150	-1.89699	1.66567	Protein-serine/threonine phosphatase	AT1G07160
	HORVU6Hr1G075900	-1.64766	1.90515	Geranylgeranyl reductase	AT1G74470 (AtGGR/AtCHLP)
	HORVU6Hr1G015770	-2.02827	1.4848	Predicted protein	no
	HORVU2Hr1G085270	-1.68404	1.84764	Chitinase	AT2G43590
	HORVU3Hr1G001060	-1.78916	1.73662	Uncharacterized protein	no
	HORVU3Hr1G077890	-1.71472	1.80356	Uncharacterized protein	no
	HORVU1Hr1G048950	-1.66055	1.8486	Uncharacterized protein	no
	HORVU5Hr1G008180	-1.68819	1.80497	Uncharacterized protein	no
	HORVU0Hr1G010810	-1.9635	1.48474	VQ domain containing protein	no
	HORVU7Hr1G007800	-1.58799	1.87217	Uncharacterized protein	no
	HORVU7Hr1G042120	-1.82788	1.61806	Uncharacterized protein	AT1G68570 (AtNPF3.1/AtNitr1)
	HORVU2Hr1G019820	-1.89412	1.53129	Uncharacterized protein	no
	HORVU7Hr1G106420	-1.71488	1.72432	Uncharacterized protein	no
	HORVU3Hr1G117570	-1.28158	2.04131	Uncharacterized protein	no
	HORVU2Hr1G017270	-1.67276	1.72539	Uncharacterized protein	no
	HORVU2Hr1G083700	-1.84549	1.53502	Ubiquitin-like domain containing protein	AT5G14360
	HORVU3Hr1G023780	-2.11088	1.09586	Uncharacterized protein	AT5G42830
	HORVU3Hr1G026920	-1.51068	1.84567	Predicted protein	no
	HORVU1Hr1G094710	-1.28946	1.9902	Uncharacterized protein	no
	HORVU5Hr1G109710	-1.82962	1.48507	Uncharacterized protein	AT1G03130 (AtPSAD2)
	HORVU4Hr1G000620	-1.54835	1.77692	Uncharacterized protein	AT5G60790 (AtGCN1)
	HORVU0Hr1G003850	-1.74971	1.56172	Predicted protein	no
	HORVU7Hr1G091250	-1.5798	1.7266	Alpha-amylase	AT4G25000 (AtAMY1)
	HORVU5Hr1G097150	-1.91953	1.2672	Uncharacterized protein	AT5G67360 (AtARA2)
	HORVU1Hr1G079280	-1.68499	1.55559	Unknown protein	no
	HORVU7Hr1G086010	-1.56763	1.65847	Predicted protein	AT1G22750
	HORVU4Hr1G084930	-1.76365	1.44405	Uncharacterized protein	AT2G02370
	HORVU1Hr1G076800	-1.66116	1.54429	Dof-type domain containing protein	no
	HORVU4Hr1G000850	-1.83386	1.32216	C2 domain containing protein	AT5G23950
	HORVU3Hr1G082030	-1.74919	1.42748	Predicted protein	no
	HORVU3Hr1G113620	-1.18051	1.89192	Barwin domain containing protein	AT3G04720 (AtHEL/AtPR-4)
	HORVU3Hr1G013270	-1.61729	1.53873	Unknown protein	AT3G14470 (AtRPP13L1)
	HORVU3Hr1G067760	-1.60832	1.5371	Methyltransf_11 domain containing protein	AT5G10830
	HORVU0Hr1G015890	-1.70838	1.40195	Uncharacterized protein	no
	HORVU7Hr1G113290	-1.43194	1.66017	Uncharacterized protein	no
	HORVU7Hr1G002110	-1.5839	1.4985	Uncharacterized protein	AT3G61490 (AtPG55)
	HORVU6Hr1G029540	-1.92338	1.01547	Predicted protein	AT5G13210
	HORVU6Hr1G020380	-1.31958	1.72494	Uncharacterized protein	AT4G16130 (AtARA1)
	HORVU2Hr1G006690	-1.70807	1.31074	FH2 domain containing protein	AT5G54650 (AtFH5)
	HORVU2Hr1G083680	-1.8394	1.07738	Ubiquitin-like domain containing protein	AT5G14360
	HORVU2Hr1G019270	-1.62494	1.37074	Uncharacterized protein	no
	HORVU1Hr1G089830	-1.50203	1.49966	Uncharacterized protein	AT2G24190 (AtSDR2b)
	HORVU6Hr1G088960	-1.35054	1.63298	Predicted protein	AT3G14690 (AtCYP72A15)
	HORVU0Hr1G001490	-1.55081	1.44366	Uncharacterized protein	AT1G52230 (AtPSAH1)
	HORVU2Hr1G119110	-1.36006	1.60362	Predicted protein	no
	HORVU2Hr1G099410	-1.89403	0.868804	Uncharacterized protein	AT1G43860
	HORVU5Hr1G122060	-1.45951	1.48137	Predicted protein	AT2G02850 (AtARPN)
	HORVU5Hr1G112610	-1.28126	1.62382	rRNA N-glycosidase	no
	HORVU2Hr1G121060	-1.80831	0.994752	Amino_oxidase domain containing protein	AT2G43020 (AtPAO2)
	HORVU1Hr1G037270	-1.24114	1.63207	Uncharacterized protein	no
	HORVU5Hr1G113900	-1.6313	1.23215	Uncharacterized protein	no
	HORVU5Hr1G069110	-1.68881	1.13999	Predicted protein	AT1G19190 (AtCXE1)
	HORVU6Hr1G064770	-1.38493	1.48725	DUF295 domain containing protein	no
	HORVU7Hr1G042160	-1.40116	1.45303	Uncharacterized protein	no
	HORVU7Hr1G087700	-1.64961	1.15608	Uncharacterized protein	no
	HORVU2Hr1G078790	-1.52365	1.28948	Peptidase A1 domain containing protein	AT2G03200
	HORVU3Hr1G020800	-1.41476	1.40553	Uncharacterized protein	AT4G39490 (AtCYP96A10)
	HORVU5Hr1G059310	-1.41291	1.40624	Uncharacterized protein	no
	HORVU4Hr1G054210	-1.55038	1.24564	Uncharacterized protein	AT3G16910 (AtACN1)
	HORVU3Hr1G105420	-1.42063	1.38584	Uncharacterized protein	AT3G57240 (AtBG3)
	HORVU5Hr1G111850	-1.59899	1.16761	Fe2OG dioxygenase domain containing protein	AT3G14160 (AtALKBH1c)
	HORVU5Hr1G041030	-1.67022	1.04979	Predicted protein	AT5G19160 (AtTBL11)
	HORVU4Hr1G073730	-1.39798	1.37278	Uncharacterized protein	AT2G38820
	HORVU7Hr1G027810	-1.17005	1.56824	Uncharacterized protein	no
	HORVU1Hr1G085480	-1.52088	1.2157	Predicted protein	AT1G28380 (AtNSL1)
	HORVU5Hr1G112440	-1.64002	1.04423	Predicted protein	AT4G36920 (AtAP2)
	HORVU7Hr1G082710	-1.32704	1.41278	Peptide-methionine (R)-S-oxide reductase	AT1G53670 (AtMSRB1)
	HORVU2Hr1G065330	-1.1767	1.53291	CASP-like protein	no
	HORVU5Hr1G111290	-1.24396	1.47457	Uncharacterized protein	no
	HORVU2Hr1G116090	-1.45753	1.24079	DOG1 domain containing protein	AT5G10030 (AtTGA4)
	HORVU5Hr1G030460	-1.52137	1.15556	Uncharacterized protein	no
	HORVU4Hr1G077850	-1.1647	1.51092	Uncharacterized protein	no
	HORVU2Hr1G030130	-1.52768	1.14237	Uncharacterized protein	AT5G65420 (AtCYCD4;1)
	HORVU7Hr1G078670	-1.16659	1.50102	Uncharacterized protein	AT4G29820 (AtCFIM25)
	HORVU3Hr1G090350	-1.20993	1.4532	Uncharacterized protein	no
	HORVU5Hr1G042740	-1.18791	1.4597	Glycosyltransferase	AT1G51450 (AtTRAUCO)
	HORVU6Hr1G031640	-1.5334	1.06483	VQ domain containing protein	no
	HORVU4Hr1G085970	-1.49249	1.1142	Uncharacterized protein	AT2G45720
	HORVU5Hr1G018830	-1.41583	1.20552	C2H2-type domain containing protein	no
	HORVU3Hr1G047220	-1.25465	1.28835	Predicted protein	no
	HORVU5Hr1G048300	-1.36255	1.13813	Uncharacterized protein	AT2G29970 (AtSMXL7)
	HORVU3Hr1G028810	-1.4385	1.02246	Uncharacterized protein	AT1G17100 (AtHBP1/AtSOUL1/AtcHBP1)
	HORVU2Hr1G030610	-1.4033	1.06029	Uncharacterized protein	no
	HORVU0Hr1G000780	-1.3506	1.12356	Uncharacterized protein	no
	HORVU5Hr1G081820	-1.39709	1.06377	Uncharacterized protein	no
	HORVU3Hr1G015540	-1.29746	1.17616	Uncharacterized protein	no
	HORVU4Hr1G088340	-1.25306	1.208	Fe2OG dioxygenase domain containing protein	AT1G17010
	HORVU2Hr1G081460	-1.3836	1.05021	Indole-3-glycerol-phosphate synthase	AT2G04400
	HORVU2Hr1G016440	-1.26431	1.15091	Uncharacterized protein	AT1G09350 (AtGolS3)
	HORVU5Hr1G073680	-1.00681	1.3834	Uncharacterized protein	AT1G27650 (AtU2AF35A)
	HORVU3Hr1G081860	-1.17333	1.18002	Uncharacterized protein	AT4G10110 (AtRBM7)
	HORVU3Hr1G112010	-1.03438	1.29734	Uncharacterized protein	no
	HORVU3Hr1G015740	-1.11089	1.23028	Uncharacterized protein	no.
	HORVU6Hr1G057170	-1.15026	1.17252	Uncharacterized protein	AT4G06536
	HORVU5Hr1G006280	-1.07038	1.20972	Predicted protein	AT2G34930
	HORVU4Hr1G078950	-1.17197	1.09256	Uncharacterized protein	no
	HORVU7Hr1G027480	-1.01195	1.03648	Predicted protein	AT3G28690 (AtPBL36)
	HORVU7Hr1G088430	-1.55437	0.975401	Uncharacterized protein	no
	HORVU3Hr1G084220	-1.57811	0.743897	Glyco_hydro_18 domain containing protein	AT5G24090 (AtCHIA)
	HORVU1Hr1G047390	-1.49427	0.716396	Uncharacterized protein	no
	HORVU1Hr1G072720	-1.36144	0.85706	Predicted protein	no
	HORVU1Hr1G018360	-1.27574	0.890603	Uncharacterized protein	no
	HORVU5Hr1G078950	-1.16485	0.978501	Predicted protein	AT2G22500 (AtPUMP5)
	HORVU1Hr1G017460	-1.19565	0.941149	Uncharacterized protein	AT3G62150 (AtPGP21)
	HORVU1Hr1G017480	-1.14498	0.889399	Predicted protein	no
	HORVU2Hr1G032970	-1.0624	0.973238	Probable 6-phosphogluconolactonase	AT1G13700 (AtPGL1)
	HORVU3Hr1G059700	-1.08958	0.881109	MPN domain containing protein	AT1G10600 (AtMSH2)
	HORVU2Hr1G021350	-1.01664	0.938383	GH10 domain containing protein	AT1G10050 (AtXyn2)
	HORVU3Hr1G045890	-1.05408	0.735111	YTH domain containing protein	AT1G48110 (AtECT7)
	HORVU3Hr1G001450	-1.00766	0.788156	Uncharacterized protein	AT3G03440
	HORVU2Hr1G083170	-1.02635	0.730479	Protein-methionine-S-oxide reductase	AT5G07470 (AtMSRA3)
