# Supplementary material for: Ca2+-dependent H2O2 response in roots and leaves of barley - a transcriptomic investigation
Source: BMC Plant Biol. 2025 Feb 20;25:232. doi: 10.1186/s12870-025-06248-9 (PMC11841189; doi:10.1186/s12870-025-06248-9)
Supplement: Supplementary file 6 — Supplementary Material 6: Additional File 6: Table S4 A comparison of the obtained unique genes in root H2O2+LaCl3 (Table S2) to root H2O2-DEGs obtained in our former study (Bhattacharyya et al 2023). For the shared genes between both treatments a selection based on a log2FC difference (delta log2FC) was performed and only genes showing a delta >1 was considered for further analyses. A clustering of the obtained genes resulted in a total of five clusters. control: ddH2O; UCs: genes with unchanged expression vs control [file 12870_2025_6248_MOESM6_ESM.xlsx]

## Sheet: Legend
Supplementary Table S2: Differentially expressed genes (DEGs) between either H2O2+LaCl3 or LaCl3 treated samples and control sample treated with H20 as reported in Bhattacharyya et al., 2023) . Differential expression analysis was carried out s using DESeq2. Attached are the output files obtained after comparing LaCl3 +H2O2 treated samples with control samples, in the leaf and the root, as well a…

## Sheet: Leaf H2O2+LaCl3 raw
	Gene-ID	Log2FC	FDR
DEGs (FDR<0.01)	HORVU3Hr1G117650	-6.84416	4.83753e-109
	HORVU4Hr1G090860	-4.42711	3.67007e-98
	HORVU6Hr1G027810	-3.39519	7.3442e-45
	HORVU5Hr1G014170	-3.68047	7.41892e-42
	HORVU7Hr1G091250	-3.28812	2.41961e-40
	HORVU5Hr1G067490	2.45521	2.01792e-39
	HORVU3Hr1G117570	-4.20493	8.2041e-37
	HORVU3Hr1G117590	-4.18107	2.38387e-33
	HORVU1Hr1G072890	-2.94151	6.17214e-32
	HORVU5Hr1G065420	4.06153	1.0334e-29
	HORVU6Hr1G003300	3.28847	3.30371e-28
	HORVU2Hr1G023450	-2.38592	1.38533e-27
	HORVU3Hr1G022260	-2.32741	7.43469e-27
	HORVU7Hr1G085130	2.16892	7.43469e-27
	HORVU5Hr1G084230	-4.44478	4.6131e-26
	HORVU2Hr1G116830	3.46303	7.61665e-25
	HORVU7Hr1G084940	2.42224	3.88589e-24
	HORVU5Hr1G093580	-2.35321	4.86846e-24
	HORVU3Hr1G093270	-3.88457	4.17797e-23
	HORVU5Hr1G080420	-3.88539	8.82241e-23
	HORVU4Hr1G073840	-2.28446	2.52424e-22
	HORVU4Hr1G080820	-3.53894	3.51034e-22
	HORVU4Hr1G077300	-2.93197	4.32752e-22
	HORVU6Hr1G082360	2.37769	7.25908e-22
	HORVU3Hr1G116060	-1.87197	1.23685e-20
	HORVU2Hr1G105010	1.96542	5.11821e-20
	HORVU2Hr1G005330	-4.14562	6.47288e-20
	HORVU3Hr1G016320	2.0559	2.45676e-19
	HORVU2Hr1G032100	3.46661	2.91635e-19
	HORVU5Hr1G019030	-1.54436	6.96227e-19
	HORVU4Hr1G017030	1.6583	1.18533e-18
	HORVU4Hr1G013170	-1.89516	1.59048e-18
	HORVU3Hr1G035470	-2.13667	1.60438e-18
	HORVU3Hr1G117640	-4.0233	1.0755e-17
	HORVU2Hr1G046370	-2.93524	2.35879e-17
	HORVU4Hr1G065920	1.63214	4.36207e-17
	HORVU4Hr1G083070	-2.09323	1.7504e-16
	HORVU1Hr1G082250	-1.62362	2.09926e-16
	HORVU2Hr1G099470	-1.83513	4.16212e-16
	HORVU2Hr1G121050	-3.28335	5.0905e-16
	HORVU4Hr1G011740	-2.03177	6.29014e-16
	HORVU4Hr1G085590	-2.34401	6.29014e-16
	HORVU4Hr1G057000	-1.70121	1.12683e-15
	HORVU4Hr1G006850	-1.80986	1.59725e-15
	HORVU1Hr1G040720	-1.57156	2.3279e-15
	HORVU2Hr1G077180	-2.96387	2.3611e-15
	HORVU2Hr1G066080	1.9924	3.21682e-15
	HORVU3Hr1G021150	-2.06571	3.21682e-15
	HORVU4Hr1G085250	-2.54877	4.94797e-15
	HORVU6Hr1G035470	-2.08295	5.7295e-15
	HORVU3Hr1G095700	-2.30857	8.32279e-15
	HORVU1Hr1G092440	-2.31497	1.52235e-14
	HORVU4Hr1G054480	-1.46139	1.67184e-14
	HORVU2Hr1G104080	-2.89446	2.41024e-14
	HORVU7Hr1G035320	1.77168	2.61107e-14
	HORVU1Hr1G004230	1.48082	3.63643e-14
	HORVU2Hr1G014020	-1.52388	4.06862e-14
	HORVU5Hr1G086710	-2.89874	4.15608e-14
	HORVU2Hr1G004170	2.34056	6.5831e-14
	HORVU5Hr1G080300	-3.36459	1.04533e-13
	HORVU2Hr1G106040	1.90049	1.12515e-13
	HORVU3Hr1G115990	-1.73414	1.41876e-13
	HORVU6Hr1G008640	-1.6739	1.62062e-13
	HORVU2Hr1G007640	-3.68713	2.52432e-13
	HORVU5Hr1G011540	-3.01416	2.67102e-13
	HORVU5Hr1G097930	1.72661	3.75988e-13
	HORVU5Hr1G119480	-2.96677	3.75988e-13
	HORVU5Hr1G080860	-2.076	5.81511e-13
	HORVU3Hr1G111600	-2.04782	7.85824e-13
	HORVU7Hr1G049370	1.49514	9.11519e-13
	HORVU2Hr1G087010	1.47237	1.22681e-12
	HORVU4Hr1G082600	-1.54065	1.73721e-12
	HORVU5Hr1G098360	2.13297	1.78308e-12
	HORVU4Hr1G075090	-1.65912	1.78308e-12
	HORVU2Hr1G104040	-3.18777	1.95745e-12
	HORVU2Hr1G105190	-2.21515	2.06219e-12
	HORVU6Hr1G073730	-1.35908	2.24999e-12
	HORVU6Hr1G088580	-1.62097	4.44099e-12
	HORVU3Hr1G007280	-1.51746	5.4194e-12
	HORVU2Hr1G091270	-1.69169	7.92477e-12
	HORVU4Hr1G072960	-1.83543	8.36318e-12
	HORVU7Hr1G098370	-1.49599	9.47878e-12
	HORVU4Hr1G063640	1.79444	1.09108e-11
	HORVU6Hr1G004000	1.72773	1.47571e-11
	HORVU6Hr1G089980	-1.7029	1.47571e-11
	HORVU2Hr1G083490	1.92514	3.223e-11
	HORVU1Hr1G065600	-2.45487	4.29017e-11
	HORVU6Hr1G058580	-2.28792	4.32573e-11
	HORVU2Hr1G093670	1.39337	5.01381e-11
	HORVU2Hr1G031400	2.44346	9.91572e-11
	HORVU4Hr1G002360	1.7641	1.02892e-10
	HORVU2Hr1G121060	-1.64073	1.03889e-10
	HORVU5Hr1G103680	1.26032	1.32273e-10
	HORVU7Hr1G101580	1.28839	1.32273e-10
	HORVU5Hr1G047000	1.42286	1.3836e-10
	HORVU7Hr1G034070	-3.12318	1.71561e-10
	HORVU1Hr1G055420	1.54297	3.53785e-10
	HORVU2Hr1G084640	1.74662	3.60452e-10
	HORVU4Hr1G047240	1.4658	4.59669e-10
	HORVU7Hr1G077750	1.2657	4.88694e-10
	HORVU6Hr1G081400	-1.84846	5.12825e-10
	HORVU1Hr1G094490	1.58861	5.22186e-10
	HORVU7Hr1G093050	1.81603	5.81339e-10
	HORVU2Hr1G089540	2.10272	6.29682e-10
	HORVU2Hr1G026820	-1.58985	6.44957e-10
	HORVU5Hr1G084900	-1.58951	7.37207e-10
	HORVU5Hr1G104580	-1.95738	7.68642e-10
	HORVU7Hr1G038860	-1.76563	7.70714e-10
	HORVU3Hr1G067860	1.31999	7.82419e-10
	HORVU4Hr1G008610	-2.06891	7.82419e-10
	HORVU2Hr1G078510	1.58234	7.95111e-10
	HORVU7Hr1G051150	-1.39623	7.95111e-10
	HORVU3Hr1G068830	-2.54489	8.49851e-10
	HORVU2Hr1G034270	-1.62138	9.14509e-10
	HORVU0Hr1G022690	-1.66404	9.31e-10
	HORVU4Hr1G089490	2.27324	9.58237e-10
	HORVU6Hr1G037000	-1.36377	1.09887e-09
	HORVU3Hr1G006450	-1.98663	1.13015e-09
	HORVU3Hr1G088120	-2.05294	1.77492e-09
	HORVU6Hr1G025830	1.24844	1.78709e-09
	HORVU5Hr1G020510	-1.43061	1.84326e-09
	HORVU5Hr1G073690	-2.89833	2.26549e-09
	HORVU5Hr1G124380	-1.28299	3.22149e-09
	HORVU1Hr1G052290	1.64975	3.38563e-09
	HORVU1Hr1G087070	1.47019	3.6025e-09
	HORVU5Hr1G093660	-1.81522	4.34725e-09
	HORVU7Hr1G029260	1.80472	5.06669e-09
	HORVU7Hr1G019700	-2.68397	5.15041e-09
	HORVU4Hr1G021000	-1.72763	6.41048e-09
	HORVU5Hr1G065370	1.23607	8.07009e-09
	HORVU2Hr1G093950	-2.05273	8.58411e-09
	HORVU3Hr1G030150	-1.12201	1.04379e-08
	HORVU6Hr1G016710	-1.37865	1.07946e-08
	HORVU7Hr1G040690	-2.03784	1.08222e-08
	HORVU7Hr1G076790	-1.38713	1.2338e-08
	HORVU2Hr1G005220	1.81548	1.23441e-08
	HORVU5Hr1G080090	-2.82958	1.24383e-08
	HORVU4Hr1G055220	-1.55145	1.35809e-08
	HORVU0Hr1G018190	1.63236	1.55338e-08
	HORVU5Hr1G013990	-1.57402	1.7708e-08
	HORVU5Hr1G071720	1.48555	2.14785e-08
	HORVU5Hr1G073570	-2.10019	2.35419e-08
	HORVU3Hr1G083740	1.43605	2.45616e-08
	HORVU4Hr1G085800	-2.31818	2.45616e-08
	HORVU1Hr1G053440	1.31334	2.48374e-08
	HORVU3Hr1G036860	1.26056	2.50809e-08
	HORVU7Hr1G057330	1.5496	2.54527e-08
	HORVU5Hr1G077920	-1.69004	2.86775e-08
	HORVU7Hr1G072670	-2.5352	2.87539e-08
	HORVU6Hr1G091840	-1.82218	3.03936e-08
	HORVU7Hr1G017790	-1.68984	3.45929e-08
	HORVU7Hr1G033230	-1.31554	3.51725e-08
	HORVU0Hr1G040430	1.5198	3.73224e-08
	HORVU2Hr1G108520	-2.92204	3.75953e-08
	HORVU3Hr1G021190	1.31336	4.48856e-08
	HORVU2Hr1G042370	1.8226	4.6462e-08
	HORVU5Hr1G073800	-1.55331	4.6462e-08
	HORVU2Hr1G107100	-1.74091	5.36275e-08
	HORVU5Hr1G059430	-1.19956	5.3716e-08
	HORVU0Hr1G022030	2.08437	5.59579e-08
	HORVU1Hr1G046680	-1.71349	5.95325e-08
	HORVU2Hr1G116700	1.53572	5.99257e-08
	HORVU7Hr1G080990	1.14771	7.29369e-08
	HORVU2Hr1G017080	1.77535	7.88009e-08
	HORVU7Hr1G050530	1.376	8.22171e-08
	HORVU7Hr1G044160	-2.10357	9.45861e-08
	HORVU7Hr1G035500	1.41343	9.85286e-08
	HORVU7Hr1G040030	1.09165	1.02674e-07
	HORVU1Hr1G023220	-1.29273	1.02674e-07
	HORVU1Hr1G004330	-1.28129	1.10017e-07
	HORVU4Hr1G059390	1.27032	1.17043e-07
	HORVU1Hr1G066090	-1.3568	1.17043e-07
	HORVU6Hr1G065430	-2.16098	1.33748e-07
	HORVU1Hr1G070190	-2.12071	1.33748e-07
	HORVU2Hr1G013940	-1.39044	1.41926e-07
	HORVU2Hr1G114220	-2.09408	1.4678e-07
	HORVU7Hr1G010300	2.50062	1.4678e-07
	HORVU2Hr1G108780	1.51655	1.56367e-07
	HORVU5Hr1G096940	1.06427	1.56367e-07
	HORVU7Hr1G088510	-2.58231	1.67222e-07
	HORVU6Hr1G025840	-1.18374	1.77194e-07
	HORVU3Hr1G008420	-1.02051	1.90391e-07
	HORVU2Hr1G107480	-1.06201	1.97179e-07
	HORVU7Hr1G057410	1.48578	1.99231e-07
	HORVU7Hr1G030690	1.02616	2.08749e-07
	HORVU4Hr1G013210	1.72388	2.11286e-07
	HORVU4Hr1G020710	-1.38397	2.25093e-07
	HORVU2Hr1G032780	1.67676	2.27825e-07
	HORVU1Hr1G079730	1.40477	2.57904e-07
	HORVU3Hr1G067130	-1.42341	2.62873e-07
	HORVU5Hr1G074010	2.21037	2.77437e-07
	HORVU1Hr1G073940	1.58172	2.87907e-07
	HORVU3Hr1G020490	1.66483	2.93437e-07
	HORVU7Hr1G121210	1.61175	3.08603e-07
	HORVU6Hr1G027640	-1.80226	3.40647e-07
	HORVU3Hr1G064920	-2.53094	3.46779e-07
	HORVU6Hr1G080750	1.28516	3.74565e-07
	HORVU0Hr1G002720	1.62269	3.89327e-07
	HORVU7Hr1G084420	-2.14157	4.06405e-07
	HORVU4Hr1G066740	1.60299	4.54718e-07
	HORVU6Hr1G077750	-1.28613	4.70781e-07
	HORVU6Hr1G081160	-1.57499	4.80463e-07
	HORVU5Hr1G102900	-1.33878	4.957e-07
	HORVU7Hr1G001040	1.29287	5.48831e-07
	HORVU4Hr1G073480	-1.24274	5.52182e-07
	HORVU4Hr1G060720	1.72711	5.53477e-07
	HORVU6Hr1G073520	-1.34668	5.71084e-07
	HORVU3Hr1G027220	1.29597	6.03308e-07
	HORVU4Hr1G005810	2.28323	6.08078e-07
	HORVU2Hr1G041080	1.28033	6.30861e-07
	HORVU1Hr1G017660	1.16294	6.43955e-07
	HORVU5Hr1G049160	-1.32653	6.5285e-07
	HORVU5Hr1G012240	-1.17626	6.68184e-07
	HORVU2Hr1G099550	-1.13754	6.77239e-07
	HORVU4Hr1G027660	-0.998727	7.0429e-07
	HORVU7Hr1G012300	1.22151	7.51219e-07
	HORVU3Hr1G108170	-1.16773	7.92599e-07
	HORVU2Hr1G115960	1.6394	7.95157e-07
	HORVU3Hr1G117440	-1.21632	8.0802e-07
	HORVU1Hr1G065030	1.33905	8.2203e-07
	HORVU3Hr1G093350	-1.42777	8.32131e-07
	HORVU2Hr1G067750	1.91473	8.61602e-07
	HORVU5Hr1G018240	-1.35807	8.61602e-07
	HORVU4Hr1G078950	-1.7962	8.71599e-07
	HORVU7Hr1G040790	-1.11694	8.99511e-07
	HORVU4Hr1G028720	-1.86681	8.99511e-07
	HORVU6Hr1G053550	-1.04598	8.99511e-07
	HORVU3Hr1G018820	-0.972582	9.25821e-07
	HORVU5Hr1G062720	-0.995985	9.35997e-07
	HORVU7Hr1G122470	-1.18212	9.42255e-07
	HORVU7Hr1G000260	1.67451	9.48345e-07
	HORVU5Hr1G098720	-1.04169	1.06655e-06
	HORVU4Hr1G080810	-1.26444	1.06655e-06
	HORVU4Hr1G090660	1.97039	1.18979e-06
	HORVU5Hr1G097730	-0.888622	1.20847e-06
	HORVU2Hr1G094780	-1.45646	1.29544e-06
	HORVU4Hr1G072310	1.62242	1.35468e-06
	HORVU4Hr1G063190	1.49462	1.3616e-06
	HORVU2Hr1G088110	-1.56166	1.37929e-06
	HORVU2Hr1G093210	-1.40858	1.42703e-06
	HORVU2Hr1G076970	-1.29896	1.43893e-06
	HORVU5Hr1G065350	0.960317	1.58256e-06
	HORVU2Hr1G091910	1.16873	1.62634e-06
	HORVU6Hr1G064620	-1.03691	1.68283e-06
	HORVU5Hr1G103990	2.00657	1.70681e-06
	HORVU7Hr1G100810	-1.00584	1.70681e-06
	HORVU4Hr1G043530	-1.45594	1.75922e-06
	HORVU2Hr1G018440	-1.87789	1.78858e-06
	HORVU2Hr1G065100	-1.27188	1.78858e-06
	HORVU2Hr1G022780	1.28752	1.81226e-06
	HORVU7Hr1G088920	1.49688	1.81539e-06
	HORVU4Hr1G078400	-1.61947	2.04196e-06
	HORVU7Hr1G087490	-1.45896	2.1487e-06
	HORVU6Hr1G060610	-1.8649	2.22745e-06
	HORVU5Hr1G040970	-1.10679	2.36599e-06
	HORVU2Hr1G080460	-1.65707	2.53499e-06
	HORVU2Hr1G082700	-2.53628	2.55848e-06
	HORVU2Hr1G115890	-1.4061	2.55969e-06
	HORVU3Hr1G058100	1.41402	2.58026e-06
	HORVU6Hr1G070510	-1.12326	2.72005e-06
	HORVU1Hr1G079450	-1.31694	2.84361e-06
	HORVU2Hr1G041110	1.20633	2.89413e-06
	HORVU6Hr1G029750	1.33975	2.9885e-06
	HORVU3Hr1G029200	1.23573	3.29584e-06
	HORVU2Hr1G099450	-0.881349	3.31751e-06
	HORVU2Hr1G039070	1.01691	3.47041e-06
	HORVU1Hr1G014200	1.71181	3.47041e-06
	HORVU5Hr1G092960	-1.51986	3.4878e-06
	HORVU1Hr1G073460	-1.73739	3.58566e-06
	HORVU3Hr1G020100	-1.27037	3.60099e-06
	HORVU3Hr1G026970	1.61628	3.62891e-06
	HORVU0Hr1G012860	-1.54698	3.71237e-06
	HORVU1Hr1G025940	1.07468	4.09588e-06
	HORVU4Hr1G072300	-1.22395	4.15703e-06
	HORVU2Hr1G002320	-1.63259	4.19241e-06
	HORVU3Hr1G096910	-1.86539	4.22564e-06
	HORVU5Hr1G097940	0.936062	4.72195e-06
	HORVU5Hr1G093640	-1.09139	4.82793e-06
	HORVU4Hr1G078350	-1.76081	4.83296e-06
	HORVU5Hr1G093770	-1.75779	4.84135e-06
	HORVU5Hr1G123540	-1.54528	4.87013e-06
	HORVU2Hr1G037470	1.38422	5.18237e-06
	HORVU4Hr1G090820	-0.980969	5.41868e-06
	HORVU5Hr1G116920	-1.05961	5.44724e-06
	HORVU1Hr1G049230	-2.12401	5.72087e-06
	HORVU4Hr1G009070	-1.71778	5.95576e-06
	HORVU4Hr1G071040	1.7359	5.95576e-06
	HORVU1Hr1G011990	-1.18204	6.00803e-06
	HORVU3Hr1G030360	1.68612	6.21856e-06
	HORVU7Hr1G051730	1.80689	6.633e-06
	HORVU1Hr1G071380	-2.36385	6.76988e-06
	HORVU5Hr1G016780	0.937984	6.7978e-06
	HORVU7Hr1G116310	-1.70537	6.82768e-06
	HORVU2Hr1G096910	1.42865	7.05699e-06
	HORVU6Hr1G039940	-1.22438	7.35445e-06
	HORVU1Hr1G047430	1.55862	7.48671e-06
	HORVU2Hr1G105100	1.12456	8.10014e-06
	HORVU3Hr1G091230	-1.21791	8.10014e-06
	HORVU2Hr1G032710	-1.61405	8.41277e-06
	HORVU3Hr1G083560	-1.09847	8.44363e-06
	HORVU3Hr1G000120	-1.30264	9.1415e-06
	HORVU4Hr1G021650	-1.86631	9.17533e-06
	HORVU5Hr1G115250	-1.7561	9.55166e-06
	HORVU5Hr1G113240	1.23737	9.63763e-06
	HORVU5Hr1G067530	1.07469	9.65111e-06
	HORVU5Hr1G046480	1.02517	9.90346e-06
	HORVU5Hr1G069510	-1.61379	1.05679e-05
	HORVU3Hr1G092020	-1.32653	1.15376e-05
	HORVU4Hr1G000850	-0.8845	1.15376e-05
	HORVU5Hr1G047150	-1.9545	1.15648e-05
	HORVU7Hr1G098260	-1.36874	1.15648e-05
	HORVU4Hr1G054370	-1.2233	1.19827e-05
	HORVU4Hr1G087980	1.95475	1.19827e-05
	HORVU1Hr1G049420	-1.84777	1.20042e-05
	HORVU0Hr1G002870	1.89974	1.3887e-05
	HORVU3Hr1G000350	-1.4391	1.4369e-05
	HORVU2Hr1G073210	-1.52085	1.44112e-05
	HORVU3Hr1G082690	-0.949893	1.57669e-05
	HORVU7Hr1G114950	2.00075	1.57669e-05
	HORVU4Hr1G077310	-1.03771	1.66793e-05
	HORVU3Hr1G081400	1.11878	1.76216e-05
	HORVU2Hr1G039710	1.0907	1.79142e-05
	HORVU1Hr1G007480	-1.45877	1.79142e-05
	HORVU4Hr1G086660	-1.02981	1.80986e-05
	HORVU1Hr1G014730	-1.13171	1.94448e-05
	HORVU4Hr1G067450	1.37631	1.97561e-05
	HORVU3Hr1G108330	-1.62605	2.06397e-05
	HORVU3Hr1G064680	-1.43051	2.07726e-05
	HORVU7Hr1G094210	1.99118	2.07726e-05
	HORVU2Hr1G040780	-0.77622	2.21225e-05
	HORVU4Hr1G090440	1.50066	2.21225e-05
	HORVU2Hr1G094400	-0.82799	2.28014e-05
	HORVU5Hr1G032980	1.05463	2.38955e-05
	HORVU7Hr1G091740	-1.12317	2.4693e-05
	HORVU6Hr1G072810	-0.928403	2.51029e-05
	HORVU3Hr1G049640	-1.07548	2.52216e-05
	HORVU5Hr1G124450	-1.3892	2.55077e-05
	HORVU7Hr1G054710	-1.51836	2.59649e-05
	HORVU2Hr1G024740	-1.82442	2.6158e-05
	HORVU4Hr1G014270	-1.0805	2.64992e-05
	HORVU6Hr1G077710	1.45051	2.70962e-05
	HORVU6Hr1G063020	1.43916	2.8402e-05
	HORVU2Hr1G098160	1.31843	2.91436e-05
	HORVU5Hr1G112280	1.20333	2.91436e-05
	HORVU2Hr1G113260	1.39867	2.95495e-05
	HORVU1Hr1G074350	-1.2239	2.99167e-05
	HORVU6Hr1G060140	-2.24459	3.06925e-05
	HORVU2Hr1G125950	-1.0391	3.13717e-05
	HORVU5Hr1G059280	-2.06686	3.18619e-05
	HORVU3Hr1G088500	-1.01275	3.39025e-05
	HORVU7Hr1G117640	-1.1566	3.39025e-05
	HORVU7Hr1G096690	-1.69773	3.42394e-05
	HORVU2Hr1G113460	-0.886355	3.56708e-05
	HORVU2Hr1G078960	-1.69003	3.57461e-05
	HORVU4Hr1G051400	1.30572	3.58711e-05
	HORVU5Hr1G087530	-2.21293	3.61167e-05
	HORVU6Hr1G009850	1.30614	3.61499e-05
	HORVU6Hr1G028150	-1.9037	3.61499e-05
	HORVU4Hr1G085120	-2.05046	3.71965e-05
	HORVU3Hr1G085520	-1.09357	3.86984e-05
	HORVU3Hr1G098160	-0.826686	3.9229e-05
	HORVU5Hr1G084700	1.13796	3.96945e-05
	HORVU3Hr1G090920	0.807353	3.97003e-05
	HORVU5Hr1G065330	1.58573	3.97196e-05
	HORVU4Hr1G024290	-1.55491	3.99839e-05
	HORVU6Hr1G055960	-1.15298	4.44653e-05
	HORVU1Hr1G038680	1.10026	4.60074e-05
	HORVU4Hr1G075410	0.763659	4.68233e-05
	HORVU2Hr1G091280	-1.29746	4.87479e-05
	HORVU7Hr1G032360	-1.75189	5.03358e-05
	HORVU4Hr1G060280	1.09066	5.18951e-05
	HORVU6Hr1G029910	-1.73178	5.42628e-05
	HORVU6Hr1G075420	1.09375	5.51231e-05
	HORVU2Hr1G088760	-1.76567	5.66209e-05
	HORVU7Hr1G003090	-1.30548	5.66209e-05
	HORVU5Hr1G018480	-1.20606	5.72528e-05
	HORVU4Hr1G060000	-1.19268	5.72528e-05
	HORVU1Hr1G073280	-0.934369	5.77216e-05
	HORVU6Hr1G018770	-1.29421	6.02212e-05
	HORVU2Hr1G110230	-1.86338	6.35884e-05
	HORVU7Hr1G081250	-1.35792	6.38095e-05
	HORVU7Hr1G045330	-1.08307	6.45436e-05
	HORVU7Hr1G109850	-2.12448	6.53423e-05
	HORVU7Hr1G073370	-1.54892	6.76084e-05
	HORVU7Hr1G050770	-1.17897	6.78578e-05
	HORVU1Hr1G045220	0.945239	7.05602e-05
	HORVU3Hr1G095400	-0.956539	7.08336e-05
	HORVU7Hr1G101740	-0.956727	7.11747e-05
	HORVU1Hr1G037760	1.27769	7.17807e-05
	HORVU4Hr1G083170	2.17998	7.21248e-05
	HORVU2Hr1G079960	-1.12772	7.33601e-05
	HORVU2Hr1G108790	2.12108	7.33601e-05
	HORVU7Hr1G029720	-1.19035	7.33601e-05
	HORVU4Hr1G010540	1.46013	7.33601e-05
	HORVU2Hr1G116800	1.46313	7.68942e-05
	HORVU7Hr1G010240	1.25188	7.75034e-05
	HORVU7Hr1G008390	1.28497	8.41821e-05
	HORVU7Hr1G030210	0.9537	8.87092e-05
	HORVU3Hr1G026500	-1.14615	8.87264e-05
	HORVU7Hr1G050030	1.91952	8.87264e-05
	HORVU7Hr1G058730	-0.83311	8.87264e-05
	HORVU2Hr1G006690	-1.39212	9.03297e-05
	HORVU5Hr1G111590	0.796786	9.22618e-05
	HORVU7Hr1G096560	1.44972	9.50565e-05
	HORVU1Hr1G080040	-1.51197	9.8927e-05
	HORVU1Hr1G068950	-1.26365	0.000101608
	HORVU4Hr1G039300	-2.2395	0.000101754
	HORVU7Hr1G047790	-1.32485	0.000102664
	HORVU6Hr1G074660	1.98397	0.000107217
	HORVU4Hr1G076040	1.37934	0.000112203
	HORVU4Hr1G016730	-1.16383	0.000112227
	HORVU7Hr1G088670	2.07024	0.000124479
	HORVU4Hr1G005110	-0.953956	0.000125319
	HORVU5Hr1G088920	0.984075	0.00012579
	HORVU1Hr1G063310	-1.01818	0.000131491
	HORVU5Hr1G098190	-0.801602	0.000132086
	HORVU4Hr1G027970	1.49015	0.000132672
	HORVU7Hr1G085450	-1.04394	0.000132882
	HORVU7Hr1G109140	1.24133	0.000132882
	HORVU1Hr1G029520	-1.39641	0.000133612
	HORVU6Hr1G073630	0.918229	0.000133837
	HORVU1Hr1G040420	1.02288	0.000134945
	HORVU6Hr1G057680	1.08163	0.000138447
	HORVU1Hr1G071180	-1.48999	0.000138447
	HORVU7Hr1G115670	0.950967	0.000140562
	HORVU4Hr1G014970	0.917576	0.000142627
	HORVU5Hr1G063810	-1.22916	0.000148849
	HORVU0Hr1G002410	-1.32115	0.000149126
	HORVU3Hr1G115610	1.16976	0.000150634
	HORVU6Hr1G073990	-0.928102	0.000150634
	HORVU1Hr1G030790	0.922792	0.000150634
	HORVU1Hr1G078350	0.844329	0.000155613
	HORVU2Hr1G101980	-0.99201	0.00015663
	HORVU3Hr1G048520	-1.01548	0.000171733
	HORVU3Hr1G084360	-2.16291	0.000173865
	HORVU7Hr1G098580	2.19858	0.000179812
	HORVU1Hr1G005680	-1.4316	0.000180452
	HORVU6Hr1G059550	-0.897665	0.000180578
	HORVU5Hr1G070720	0.733853	0.000181977
	HORVU2Hr1G007130	-1.86882	0.000184032
	HORVU1Hr1G017050	0.784339	0.000184032
	HORVU2Hr1G123730	-1.5828	0.00018575
	HORVU5Hr1G110180	-0.937826	0.000186028
	HORVU7Hr1G087420	1.02144	0.000193464
	HORVU4Hr1G077360	1.41004	0.000195087
	HORVU7Hr1G093580	-0.890165	0.000197956
	HORVU7Hr1G115410	-1.56283	0.000199482
	HORVU7Hr1G036070	-1.37873	0.00020095
	HORVU3Hr1G069880	-1.22999	0.000203075
	HORVU5Hr1G124750	0.977848	0.0002041
	HORVU3Hr1G014590	-1.35135	0.000206594
	HORVU4Hr1G087840	-1.38624	0.00021359
	HORVU1Hr1G074510	-1.25288	0.000218726
	HORVU0Hr1G001430	1.67173	0.000219561
	HORVU4Hr1G016810	-1.00314	0.000226252
	HORVU4Hr1G059090	-0.767708	0.000226506
	HORVU3Hr1G097810	-1.69546	0.000231272
	HORVU6Hr1G089750	-0.886394	0.000236061
	HORVU3Hr1G098360	-1.04697	0.000238971
	HORVU0Hr1G005300	-1.06545	0.000241259
	HORVU6Hr1G028220	-1.08114	0.000244312
	HORVU4Hr1G056770	0.882828	0.000245101
	HORVU3Hr1G087480	1.77037	0.00025013
	HORVU3Hr1G086220	0.997674	0.000251653
	HORVU5Hr1G006360	-1.55561	0.000256083
	HORVU2Hr1G020220	-1.02456	0.000261085
	HORVU6Hr1G078110	-1.08829	0.000262484
	HORVU3Hr1G005500	-0.873382	0.00026475
	HORVU5Hr1G058270	-1.00365	0.000266545
	HORVU7Hr1G035440	-1.73886	0.000267015
	HORVU3Hr1G075150	1.12706	0.000267723
	HORVU7Hr1G024190	-1.75593	0.000273102
	HORVU1Hr1G054260	1.267	0.00027565
	HORVU1Hr1G039220	-1.80094	0.000277558
	HORVU6Hr1G086790	1.58281	0.000278234
	HORVU2Hr1G118410	-0.897698	0.0002786
	HORVU7Hr1G101920	1.24256	0.000286728
	HORVU7Hr1G018600	1.76999	0.000303082
	HORVU3Hr1G055650	-0.888976	0.000304351
	HORVU3Hr1G019580	1.39179	0.000305274
	HORVU2Hr1G111610	1.46605	0.000313991
	HORVU5Hr1G081090	-0.947731	0.000313991
	HORVU5Hr1G060070	-1.36175	0.000328111
	HORVU5Hr1G080060	0.870885	0.000328111
	HORVU3Hr1G106950	-0.81419	0.000330258
	HORVU3Hr1G095240	-0.901878	0.000338658
	HORVU5Hr1G080820	1.36291	0.000338658
	HORVU4Hr1G056210	-1.29513	0.000339833
	HORVU5Hr1G099200	-0.890865	0.000343317
	HORVU4Hr1G001450	-1.25969	0.000344076
	HORVU4Hr1G018230	-1.45036	0.000365539
	HORVU4Hr1G009990	1.21623	0.000370078
	HORVU7Hr1G091350	-1.49055	0.000373247
	HORVU3Hr1G013630	1.69797	0.000381915
	HORVU5Hr1G106520	-1.24877	0.000382383
	HORVU1Hr1G017970	-0.982526	0.000385945
	HORVU3Hr1G022370	-1.1647	0.000386013
	HORVU1Hr1G068910	1.02396	0.000386013
	HORVU2Hr1G105800	1.28445	0.000402298
	HORVU7Hr1G000370	-0.989791	0.000402859
	HORVU3Hr1G038050	1.5585	0.000411636
	HORVU2Hr1G121310	-1.131	0.00041737
	HORVU3Hr1G094210	-0.97044	0.000423101
	HORVU2Hr1G101770	-1.01871	0.000428978
	HORVU5Hr1G119810	-1.16542	0.000437692
	HORVU3Hr1G013690	0.774689	0.000442786
	HORVU7Hr1G084830	0.911471	0.000444088
	HORVU2Hr1G012440	-1.03692	0.000447385
	HORVU3Hr1G097770	-1.67005	0.000459422
	HORVU3Hr1G080770	-1.44957	0.000464568
	HORVU2Hr1G020270	-0.803872	0.00046932
	HORVU4Hr1G016770	-0.857958	0.000480531
	HORVU4Hr1G052430	0.926768	0.000493185
	HORVU2Hr1G018570	-1.56693	0.000495044
	HORVU3Hr1G010190	-1.85317	0.000504922
	HORVU6Hr1G004010	1.21246	0.000506566
	HORVU3Hr1G073220	-0.730868	0.000508396
	HORVU5Hr1G086500	-1.0236	0.000512187
	HORVU2Hr1G045900	0.891875	0.000522124
	HORVU1Hr1G079280	1.2526	0.000531455
	HORVU2Hr1G094360	1.53555	0.000535897
	HORVU5Hr1G080540	-1.20703	0.000540753
	HORVU5Hr1G103430	0.79137	0.000544106
	HORVU2Hr1G088030	1.34174	0.000544348
	HORVU1Hr1G028200	-1.06545	0.000556207
	HORVU3Hr1G071800	1.10275	0.000559067
	HORVU7Hr1G111010	-0.781839	0.000559067
	HORVU2Hr1G080140	-0.872476	0.000566642
	HORVU3Hr1G088350	-0.911643	0.000566642
	HORVU7Hr1G040590	-1.13815	0.000573737
	HORVU4Hr1G000310	-1.17358	0.000577128
	HORVU2Hr1G110120	1.17986	0.000580106
	HORVU4Hr1G084810	0.8752	0.000580794
	HORVU0Hr1G017530	-0.95365	0.000581127
	HORVU1Hr1G062110	0.741304	0.000581583
	HORVU3Hr1G080830	0.942282	0.000584738
	HORVU3Hr1G100350	-0.730619	0.000584738
	HORVU2Hr1G118050	1.44838	0.000586025
	HORVU2Hr1G034540	0.974706	0.000591515
	HORVU3Hr1G114970	-1.49184	0.00059331
	HORVU0Hr1G000200	-0.751437	0.000597974
	HORVU1Hr1G059020	-1.70096	0.000633713
	HORVU7Hr1G055900	-1.3608	0.000635694
	HORVU5Hr1G060370	1.90373	0.000644391
	HORVU1Hr1G083960	1.21695	0.000646859
	HORVU4Hr1G014900	-1.11103	0.000658501
	HORVU1Hr1G054240	1.03745	0.000658501
	HORVU3Hr1G083500	1.26848	0.000669272
	HORVU6Hr1G077010	-1.16288	0.000669272
	HORVU4Hr1G081990	1.15124	0.000683453
	HORVU7Hr1G046280	-0.836841	0.000710476
	HORVU3Hr1G071220	1.0671	0.000712973
	HORVU5Hr1G067200	-1.64771	0.000727737
	HORVU6Hr1G055000	-1.66205	0.000727737
	HORVU3Hr1G051610	-0.897452	0.000747093
	HORVU3Hr1G086030	-1.18188	0.000747093
	HORVU5Hr1G068110	1.34692	0.000750191
	HORVU5Hr1G005290	-0.798171	0.000757068
	HORVU0Hr1G013770	-0.842329	0.000757068
	HORVU3Hr1G071120	1.48836	0.000770076
	HORVU3Hr1G068970	-0.934393	0.000771297
	HORVU7Hr1G010690	0.751248	0.000776768
	HORVU7Hr1G027810	-1.36127	0.000793791
	HORVU6Hr1G015480	1.04984	0.000793791
	HORVU1Hr1G023510	-1.08499	0.000803364
	HORVU5Hr1G041530	1.05478	0.000809154
	HORVU2Hr1G090750	-1.62945	0.000815119
	HORVU3Hr1G009980	-0.923623	0.000817619
	HORVU6Hr1G051560	-0.782886	0.000837992
	HORVU2Hr1G027370	1.47359	0.000838058
	HORVU6Hr1G056280	0.771781	0.000843332
	HORVU3Hr1G007290	-1.22172	0.000848123
	HORVU1Hr1G005260	-1.01138	0.000848975
	HORVU1Hr1G020450	0.954187	0.000857563
	HORVU5Hr1G059410	-1.49311	0.000858249
	HORVU2Hr1G068010	-1.52694	0.00086219
	HORVU7Hr1G098490	-1.6016	0.000862203
	HORVU3Hr1G003860	-1.22026	0.000876407
	HORVU1Hr1G092670	-1.12528	0.000900606
	HORVU3Hr1G086210	-1.00413	0.000926997
	HORVU2Hr1G066480	-0.763282	0.000941376
	HORVU3Hr1G089290	1.20004	0.000967407
	HORVU3Hr1G093260	0.924122	0.000967407
	HORVU7Hr1G030660	1.31537	0.000967407
	HORVU1Hr1G038120	-0.798124	0.000967407
	HORVU3Hr1G082210	1.04518	0.000975259
	HORVU7Hr1G093080	1.07258	0.00101112
	HORVU2Hr1G015980	-1.63806	0.0010224
	HORVU1Hr1G038620	1.0032	0.0010224
	HORVU4Hr1G076690	-1.18862	0.0010269
	HORVU3Hr1G024400	1.65103	0.00103082
	HORVU6Hr1G084080	1.28918	0.00108032
	HORVU4Hr1G053130	1.1813	0.00108381
	HORVU5Hr1G070800	0.866239	0.00108478
	HORVU7Hr1G045830	0.912809	0.00108913
	HORVU7Hr1G035030	-1.00705	0.00111342
	HORVU7Hr1G076840	-1.01353	0.00111551
	HORVU4Hr1G066070	-0.999446	0.00111551
	HORVU5Hr1G064650	1.22369	0.00112805
	HORVU7Hr1G008430	1.61678	0.00113401
	HORVU6Hr1G002390	1.26234	0.00114284
	HORVU2Hr1G108420	1.27439	0.0011569
	HORVU3Hr1G036600	0.753859	0.0011569
	HORVU6Hr1G030550	1.9701	0.0011569
	HORVU2Hr1G004230	-0.980417	0.00115872
	HORVU7Hr1G102840	-0.974486	0.00116093
	HORVU2Hr1G070440	0.910914	0.00120695
	HORVU4Hr1G062330	-1.10375	0.00120695
	HORVU1Hr1G017460	-0.998499	0.00121728
	HORVU5Hr1G103770	1.08035	0.00124484
	HORVU5Hr1G080580	-0.683971	0.00126424
	HORVU2Hr1G095460	-1.95644	0.00129926
	HORVU5Hr1G096090	1.47943	0.00129926
	HORVU5Hr1G110940	1.95244	0.00129949
	HORVU0Hr1G020420	1.47513	0.00129949
	HORVU3Hr1G006140	-0.985684	0.00132505
	HORVU2Hr1G116060	0.996645	0.00133917
	HORVU2Hr1G118520	-1.8353	0.00134497
	HORVU6Hr1G012640	-1.27343	0.00134929
	HORVU1Hr1G079130	1.42524	0.00137262
	HORVU5Hr1G025710	-1.4027	0.00138491
	HORVU5Hr1G024550	-0.933993	0.00138557
	HORVU0Hr1G008850	0.777558	0.00138565
	HORVU3Hr1G074940	-1.17086	0.00139474
	HORVU4Hr1G009380	0.761751	0.00142061
	HORVU7Hr1G121700	-0.68528	0.00145171
	HORVU4Hr1G089560	-1.91318	0.00145171
	HORVU4Hr1G079310	1.07933	0.0014524
	HORVU3Hr1G078620	-1.60335	0.0014815
	HORVU2Hr1G019400	-0.784617	0.00148716
	HORVU5Hr1G093040	-1.4249	0.00149077
	HORVU5Hr1G063320	1.45617	0.00149814
	HORVU7Hr1G078500	-0.849509	0.00149814
	HORVU5Hr1G014790	0.944976	0.00152113
	HORVU5Hr1G099070	-1.05007	0.00154014
	HORVU1Hr1G013970	0.855967	0.00154189
	HORVU5Hr1G052230	-1.05601	0.00155279
	HORVU4Hr1G075180	-0.758499	0.00159397
	HORVU5Hr1G012740	-1.7647	0.00159641
	HORVU7Hr1G095900	0.997188	0.00159745
	HORVU7Hr1G099380	1.35576	0.00159745
	HORVU6Hr1G042080	-1.25416	0.0016056
	HORVU3Hr1G057200	0.967604	0.00161186
	HORVU2Hr1G085880	1.11612	0.00161551
	HORVU7Hr1G009230	0.894735	0.00161898
	HORVU2Hr1G122580	-1.54683	0.00162628
	HORVU6Hr1G091550	-0.814839	0.00163256
	HORVU6Hr1G009500	-1.92029	0.00165076
	HORVU6Hr1G079700	-1.30155	0.0016827
	HORVU3Hr1G065770	0.777879	0.00169681
	HORVU5Hr1G098780	0.926492	0.00169681
	HORVU4Hr1G054420	0.978405	0.00169681
	HORVU5Hr1G072420	0.640427	0.00170256
	HORVU2Hr1G029600	0.804831	0.00172996
	HORVU7Hr1G050710	1.25333	0.00172996
	HORVU4Hr1G072620	1.0181	0.00174873
	HORVU4Hr1G019530	-0.834509	0.00175736
	HORVU1Hr1G084690	1.47788	0.00176258
	HORVU3Hr1G072730	1.18808	0.0017635
	HORVU1Hr1G092640	-1.52492	0.0017635
	HORVU6Hr1G019520	0.897191	0.00179105
	HORVU2Hr1G117140	1.3044	0.00180333
	HORVU3Hr1G022020	1.00963	0.00181038
	HORVU7Hr1G078760	1.49466	0.00181038
	HORVU4Hr1G083820	0.7949	0.00181038
	HORVU6Hr1G089350	-1.20015	0.00181189
	HORVU3Hr1G115540	-1.20462	0.00187263
	HORVU1Hr1G055470	1.22034	0.00188266
	HORVU1Hr1G049270	-1.09389	0.00188715
	HORVU1Hr1G024240	-0.922305	0.0018997
	HORVU3Hr1G065620	1.2361	0.00190318
	HORVU1Hr1G029460	-0.909095	0.00192658
	HORVU2Hr1G100960	0.991651	0.00193363
	HORVU2Hr1G095720	-0.931798	0.00197617
	HORVU7Hr1G085790	-1.08146	0.00197847
	HORVU2Hr1G065330	-0.727	0.00198232
	HORVU7Hr1G043090	1.25	0.00198905
	HORVU7Hr1G038510	1.09831	0.00199504
	HORVU2Hr1G023560	0.618889	0.00204228
	ENSRNA049482856	1.87449	0.00204569
	HORVU7Hr1G020880	-1.44764	0.00204569
	HORVU1Hr1G083340	1.89242	0.00204569
	HORVU1Hr1G085480	-1.39204	0.00204569
	HORVU2Hr1G116780	1.58431	0.00206284
	HORVU5Hr1G028550	-1.09856	0.0020835
	HORVU5Hr1G119550	-1.50649	0.00209848
	HORVU5Hr1G011980	-1.09713	0.00212524
	HORVU7Hr1G079810	0.659564	0.00213646
	HORVU5Hr1G000980	1.00316	0.00214737
	HORVU1Hr1G073170	-0.821603	0.00214902
	HORVU7Hr1G101270	-0.980663	0.00216605
	ENSRNA049489014	1.83132	0.00216748
	HORVU7Hr1G036390	0.84299	0.00216748
	HORVU6Hr1G034620	1.11865	0.00216748
	HORVU4Hr1G068420	-1.29051	0.002171
	HORVU3Hr1G105300	-0.962925	0.00221422
	HORVU1Hr1G071260	-0.754373	0.00227471
	HORVU3Hr1G073190	0.960042	0.00238692
	HORVU4Hr1G052140	-1.31115	0.00240686
	HORVU2Hr1G027400	1.32536	0.00241685
	HORVU3Hr1G117840	-1.19247	0.00241685
	HORVU5Hr1G062290	0.814456	0.00241685
	HORVU5Hr1G082990	-0.989971	0.00241685
	HORVU3Hr1G115000	-0.957332	0.00243969
	HORVU5Hr1G050180	0.848569	0.00245967
	HORVU2Hr1G106210	1.26448	0.00246563
	HORVU2Hr1G116740	0.871844	0.00246563
	HORVU5Hr1G021750	1.71745	0.00246563
	HORVU5Hr1G108670	-0.999599	0.00246563
	HORVU3Hr1G108680	-1.8427	0.00249964
	HORVU2Hr1G039930	0.775449	0.00251561
	HORVU3Hr1G011560	1.20349	0.00252107
	HORVU4Hr1G013180	-1.6986	0.00253083
	HORVU6Hr1G021160	1.17282	0.00253083
	HORVU2Hr1G010830	1.03074	0.00253348
	HORVU5Hr1G071140	1.02257	0.00253964
	HORVU5Hr1G006900	-0.873677	0.00254243
	HORVU3Hr1G105880	0.680202	0.00254646
	HORVU6Hr1G035370	0.695595	0.00254802
	HORVU5Hr1G023800	-1.00024	0.00258108
	HORVU5Hr1G100790	0.828678	0.00258108
	HORVU5Hr1G008730	0.975399	0.00258835
	HORVU3Hr1G063310	1.49575	0.00265309
	HORVU0Hr1G017570	-1.46873	0.00266825
	HORVU2Hr1G102620	0.825366	0.00268095
	HORVU1Hr1G075860	0.999306	0.00272097
	HORVU5Hr1G087760	-1.7933	0.00273092
	HORVU4Hr1G075110	-0.813229	0.00275636
	HORVU5Hr1G063440	1.73139	0.00276323
	HORVU5Hr1G109290	-1.21247	0.00277696
	HORVU5Hr1G045020	-1.09391	0.00277762
	HORVU5Hr1G053700	1.5347	0.00279019
	HORVU7Hr1G067060	0.653861	0.00284037
	HORVU0Hr1G017160	-1.0055	0.00284037
	HORVU6Hr1G063490	0.709884	0.00289419
	HORVU6Hr1G035420	0.852565	0.00289567
	HORVU5Hr1G072620	1.00404	0.00292098
	HORVU2Hr1G092190	0.903109	0.00292949
	HORVU4Hr1G016410	-0.762988	0.00292949
	HORVU7Hr1G041300	-0.918102	0.0029557
	HORVU7Hr1G086890	-0.720592	0.00297996
	EPlHVUG00000039816	-1.14382	0.00304656
	HORVU1Hr1G038880	-1.51263	0.00306552
	HORVU3Hr1G052980	-1.09261	0.00309197
	HORVU3Hr1G013350	-0.737304	0.00313104
	HORVU0Hr1G019640	-1.16385	0.00313104
	HORVU1Hr1G015000	0.745361	0.00315736
	HORVU6Hr1G038430	-0.886992	0.00316084
	HORVU2Hr1G069440	-1.07227	0.00324864
	HORVU7Hr1G051930	-0.912466	0.003258
	HORVU2Hr1G036060	-1.7135	0.00327649
	HORVU2Hr1G061850	1.10315	0.00327649
	HORVU7Hr1G044210	-1.01917	0.00328339
	HORVU7Hr1G028880	-1.46789	0.00328511
	HORVU3Hr1G058610	1.18031	0.00333133
	HORVU6Hr1G058740	-0.815767	0.00333956
	HORVU1Hr1G061090	-0.960061	0.00337224
	HORVU5Hr1G056530	0.803044	0.00337467
	HORVU5Hr1G104050	-1.36028	0.00337467
	HORVU7Hr1G087250	-1.31041	0.00337467
	HORVU2Hr1G063840	0.914113	0.00337957
	HORVU1Hr1G049070	-1.25557	0.00340841
	HORVU3Hr1G013970	0.791131	0.00342656
	HORVU0Hr1G012930	0.958617	0.00342808
	HORVU5Hr1G072520	-0.994068	0.00343108
	HORVU4Hr1G037680	1.05658	0.00344819
	HORVU0Hr1G007340	-1.61591	0.00345756
	HORVU7Hr1G091180	-1.38242	0.00352684
	HORVU7Hr1G096040	0.955337	0.00352684
	HORVU1Hr1G055140	1.17891	0.00352684
	HORVU4Hr1G087740	0.84907	0.00359433
	HORVU2Hr1G017300	0.756482	0.0035956
	HORVU2Hr1G108840	0.887939	0.00361597
	HORVU2Hr1G111640	-0.702397	0.00361597
	HORVU2Hr1G087390	0.700713	0.00362442
	HORVU2Hr1G093960	1.06435	0.00362442
	HORVU4Hr1G015040	-1.40127	0.00362442
	HORVU3Hr1G090410	0.984755	0.00362647
	HORVU5Hr1G116310	0.85462	0.0037569
	HORVU2Hr1G013420	-1.13403	0.00378864
	HORVU3Hr1G055980	1.5061	0.00380986
	HORVU7Hr1G056770	-0.685518	0.00383186
	HORVU5Hr1G047980	0.732227	0.0038578
	HORVU2Hr1G123480	-1.10144	0.00388911
	HORVU5Hr1G112670	0.845111	0.00390052
	HORVU3Hr1G087670	1.5605	0.0039886
	HORVU3Hr1G071830	0.955252	0.00402991
	HORVU1Hr1G017700	-0.942849	0.00403478
	HORVU1Hr1G092290	-1.78759	0.00404263
	HORVU7Hr1G040720	-1.35981	0.00411949
	HORVU4Hr1G077280	1.02162	0.00412374
	HORVU5Hr1G066760	1.14761	0.00417863
	ENSRNA049488567	1.6316	0.00417863
	HORVU1Hr1G004150	-0.83238	0.00417863
	HORVU2Hr1G084910	-0.947069	0.00418855
	HORVU7Hr1G026680	0.787836	0.00419029
	HORVU4Hr1G076490	1.13882	0.00423937
	HORVU4Hr1G057740	-1.24365	0.00425605
	EPlHVUG00000039840	-1.13907	0.00425605
	HORVU4Hr1G084920	-0.685377	0.00426603
	HORVU6Hr1G089460	-1.43877	0.00426603
	HORVU1Hr1G070290	1.03231	0.00426603
	HORVU1Hr1G077560	1.5914	0.00426603
	HORVU4Hr1G084840	-1.33714	0.00428535
	HORVU3Hr1G017630	0.873353	0.00429611
	HORVU5Hr1G069880	-1.76688	0.00429611
	HORVU5Hr1G119520	-1.69334	0.00429611
	HORVU7Hr1G033030	-0.661607	0.00432523
	HORVU2Hr1G015830	-1.15914	0.00438173
	HORVU5Hr1G080430	-1.58118	0.00440319
	HORVU3Hr1G068410	-1.47068	0.00440849
	HORVU2Hr1G104150	-1.55256	0.00442351
	HORVU7Hr1G041260	-0.826929	0.00442351
	HORVU2Hr1G125110	0.914536	0.00446132
	HORVU2Hr1G081190	1.01621	0.00446998
	HORVU6Hr1G003470	-0.706552	0.00447732
	HORVU1Hr1G021180	-1.77804	0.00447732
	HORVU3Hr1G087770	-1.77748	0.00449756
	HORVU2Hr1G005170	1.74662	0.00451253
	HORVU3Hr1G053760	-0.811337	0.00451939
	HORVU5Hr1G039430	0.875493	0.00454789
	HORVU7Hr1G085650	-0.776285	0.00456558
	HORVU7Hr1G118010	-1.03158	0.00457517
	HORVU2Hr1G092820	-0.914604	0.00457855
	HORVU3Hr1G014960	-0.813756	0.00460977
	HORVU6Hr1G036760	1.20102	0.00468101
	HORVU2Hr1G111600	-1.03662	0.00471702
	HORVU0Hr1G022610	0.929806	0.00472213
	HORVU3Hr1G000720	1.0171	0.00472361
	HORVU2Hr1G120200	-1.39559	0.00473017
	HORVU4Hr1G059860	1.04383	0.00473017
	HORVU1Hr1G064210	1.0685	0.00483739
	HORVU3Hr1G074960	-0.873161	0.00486914
	HORVU4Hr1G067280	0.848117	0.00505536
	HORVU1Hr1G078370	0.830818	0.00505536
	HORVU7Hr1G042390	-0.666225	0.00507362
	HORVU2Hr1G098140	-1.73955	0.00512413
	HORVU2Hr1G080100	0.935697	0.00516213
	HORVU3Hr1G059130	-1.70732	0.00516411
	HORVU3Hr1G010570	-0.742283	0.00518958
	HORVU2Hr1G033610	-1.24999	0.00536859
	HORVU3Hr1G106850	-0.679374	0.00537792
	HORVU1Hr1G094180	-1.30838	0.00537792
	HORVU3Hr1G072860	0.777064	0.00541619
	HORVU2Hr1G098820	0.880981	0.0054325
	HORVU5Hr1G078950	-0.844084	0.0054325
	HORVU2Hr1G103010	-0.647255	0.00545107
	HORVU3Hr1G096460	-0.908477	0.00545107
	HORVU1Hr1G063450	1.4129	0.00546708
	HORVU7Hr1G092570	-0.863881	0.00547551
	HORVU7Hr1G001420	1.19857	0.00548497
	HORVU6Hr1G062260	-0.915889	0.00550688
	HORVU2Hr1G039100	1.03628	0.00554676
	HORVU1Hr1G049210	-1.06377	0.00558992
	HORVU2Hr1G011610	1.21883	0.00559243
	HORVU5Hr1G014510	0.753605	0.00559243
	HORVU6Hr1G060150	-1.05151	0.00560969
	HORVU1Hr1G070230	-0.726951	0.00562114
	HORVU7Hr1G032750	-0.747738	0.00564695
	HORVU4Hr1G000910	1.20902	0.00566762
	HORVU4Hr1G067940	1.21662	0.00568199
	HORVU5Hr1G064020	-0.976536	0.00568832
	HORVU5Hr1G086520	-1.19169	0.00569509
	HORVU1Hr1G093770	-0.869941	0.00576668
	HORVU2Hr1G021080	0.685224	0.0057691
	HORVU5Hr1G042030	-1.26316	0.00577631
	HORVU7Hr1G097000	-1.66039	0.00577631
	HORVU2Hr1G114610	-0.789701	0.00579243
	HORVU7Hr1G098540	0.792729	0.00579243
	HORVU4Hr1G008270	0.67961	0.00579992
	HORVU4Hr1G070610	-1.64076	0.00581963
	HORVU1Hr1G071460	-1.33498	0.00586838
	HORVU6Hr1G065230	-0.970999	0.00588369
	HORVU5Hr1G100910	0.724624	0.00594331
	HORVU2Hr1G124870	-0.97715	0.00597472
	HORVU5Hr1G065170	-0.622822	0.00600595
	HORVU7Hr1G115600	0.801629	0.00604507
	HORVU2Hr1G022600	-0.928266	0.0061414
	HORVU0Hr1G040490	1.12429	0.00618194
	HORVU7Hr1G115370	1.35723	0.006242
	HORVU4Hr1G069260	1.59677	0.0062873
	HORVU3Hr1G053300	0.758645	0.00644536
	HORVU6Hr1G033160	-0.587757	0.00644536
	HORVU5Hr1G085070	0.63684	0.00648561
	HORVU6Hr1G067470	-1.59087	0.00648561
	HORVU2Hr1G025380	0.748215	0.00651532
	HORVU3Hr1G072260	-0.985715	0.00653343
	HORVU1Hr1G047390	-1.00766	0.00656227
	HORVU3Hr1G016890	-1.51427	0.00659622
	HORVU1Hr1G043890	-1.71717	0.00666839
	HORVU1Hr1G056210	-1.43157	0.006721
	HORVU7Hr1G088560	-0.783712	0.00674699
	HORVU6Hr1G033450	1.18807	0.00674699
	HORVU1Hr1G063780	-1.55648	0.00676738
	HORVU7Hr1G082990	-1.15769	0.00679564
	HORVU7Hr1G046050	1.36876	0.00684057
	HORVU3Hr1G083520	1.39702	0.00686333
	HORVU6Hr1G074940	0.608951	0.00689238
	HORVU4Hr1G089520	-1.38627	0.00691702
	HORVU3Hr1G028540	-0.591083	0.00691988
	HORVU3Hr1G057860	-0.706444	0.0069361
	HORVU7Hr1G050340	0.703252	0.00700376
	HORVU2Hr1G033470	0.758702	0.00701765
	HORVU2Hr1G104030	-0.683284	0.00701765
	HORVU4Hr1G014130	0.77222	0.00701765
	HORVU0Hr1G006830	1.31821	0.00702162
	HORVU2Hr1G094090	-1.06927	0.00706309
	HORVU6Hr1G056610	0.957245	0.0070658
	HORVU7Hr1G012280	1.1706	0.00708454
	HORVU7Hr1G050140	-1.30076	0.00710314
	HORVU2Hr1G078570	0.943032	0.0071594
	HORVU4Hr1G005900	0.844736	0.00718202
	HORVU5Hr1G114890	0.893556	0.0072389
	HORVU5Hr1G114850	-0.95105	0.00725763
	HORVU3Hr1G082070	-0.872746	0.00737113
	HORVU7Hr1G020760	-1.6423	0.00739474
	HORVU3Hr1G028280	-1.17415	0.00744106
	HORVU1Hr1G074330	-1.62352	0.00751584
	HORVU3Hr1G061080	0.939704	0.00757222
	HORVU7Hr1G048470	-0.682601	0.00757222
	HORVU7Hr1G106480	-1.32727	0.00757222
	HORVU5Hr1G103440	-0.709998	0.00759648
	HORVU3Hr1G045900	1.18817	0.00759811
	HORVU5Hr1G075430	-1.0273	0.00765082
	HORVU2Hr1G027640	-0.680736	0.00780833
	HORVU6Hr1G011990	0.849289	0.00780833
	HORVU0Hr1G022580	1.12291	0.00801023
	HORVU0Hr1G012230	0.893352	0.00807476
	HORVU2Hr1G045200	-0.732017	0.00812802
	HORVU4Hr1G066510	-0.807664	0.0081404
	HORVU7Hr1G038160	0.810852	0.00822421
	HORVU7Hr1G108490	1.50372	0.00825125
	HORVU2Hr1G081890	1.67897	0.00834115
	HORVU7Hr1G113300	-1.65315	0.00834115
	HORVU1Hr1G076080	1.3069	0.00834115
	HORVU2Hr1G095320	1.12169	0.00836139
	HORVU3Hr1G003470	0.798623	0.00836139
	HORVU3Hr1G082460	-1.11382	0.00839338
	HORVU3Hr1G052490	0.634273	0.00841358
	HORVU5Hr1G115280	1.00706	0.00844505
	HORVU1Hr1G056280	-0.971179	0.00849508
	HORVU7Hr1G038220	1.13219	0.00859401
	HORVU7Hr1G049250	-0.704322	0.00859469
	HORVU7Hr1G117890	0.917057	0.00859469
	HORVU1Hr1G036920	0.734871	0.00859469
	HORVU2Hr1G036510	-0.709874	0.00860346
	HORVU1Hr1G079380	0.625913	0.00860346
	HORVU6Hr1G091700	-0.802228	0.0087018
	HORVU7Hr1G088210	-0.796989	0.00870972
	HORVU6Hr1G028190	1.34544	0.0087338
	HORVU5Hr1G072650	-1.11661	0.00879843
	HORVU4Hr1G018650	0.722057	0.00882771
	HORVU2Hr1G089020	-1.24315	0.00890829
	HORVU7Hr1G117550	1.3348	0.00890829
	HORVU4Hr1G071000	1.45603	0.00890829
	HORVU6Hr1G012510	0.606106	0.00890829
	HORVU4Hr1G059250	-0.624987	0.00892217
	HORVU2Hr1G121030	0.90266	0.00893235
	HORVU7Hr1G009370	0.867281	0.00893235
	HORVU5Hr1G002320	1.15853	0.00893248
	HORVU5Hr1G006780	0.864165	0.00893248
	HORVU5Hr1G106350	-1.02859	0.00893248
	HORVU3Hr1G001360	1.21771	0.00893713
	HORVU2Hr1G005150	-0.749478	0.00897245
	HORVU2Hr1G085690	1.03589	0.00897245
	HORVU3Hr1G069520	0.686444	0.00897245
	HORVU7Hr1G052500	-0.89472	0.00897245
	HORVU3Hr1G079410	-0.989674	0.00897753
	HORVU5Hr1G110090	-1.67029	0.00897753
	HORVU1Hr1G093760	-1.47993	0.00897753
	HORVU5Hr1G084050	1.61294	0.00898788
	HORVU2Hr1G028540	-1.1803	0.0089948
	HORVU1Hr1G044680	0.675429	0.00916015
	HORVU1Hr1G089430	0.886668	0.00917562
	HORVU5Hr1G028030	-1.02592	0.00918986
	HORVU4Hr1G013460	-1.00062	0.00920121
	HORVU5Hr1G063390	0.709265	0.00925753
	HORVU4Hr1G065110	-1.10859	0.00925753
	HORVU2Hr1G109370	0.942322	0.00927675
	HORVU2Hr1G125280	-0.71625	0.00927675
	HORVU5Hr1G024440	0.885093	0.00927675
	HORVU6Hr1G012400	-0.965736	0.00927675
	HORVU3Hr1G098400	0.800324	0.00932949
	HORVU2Hr1G124960	-0.836868	0.00933315
	HORVU2Hr1G060880	-0.753966	0.00934403
	HORVU5Hr1G021300	0.887046	0.00934403
	HORVU2Hr1G123200	0.784406	0.00939096
	HORVU5Hr1G108610	0.778728	0.00942418
	HORVU3Hr1G074310	-0.868597	0.00945755
	HORVU7Hr1G114890	0.90855	0.00954664
	HORVU5Hr1G011730	-1.03748	0.00955855
	HORVU5Hr1G002090	-0.990347	0.00964551
	HORVU7Hr1G044070	0.916786	0.00972328
	HORVU4Hr1G072340	1.30567	0.00975291
	HORVU4Hr1G089030	-1.07253	0.00975291
	HORVU6Hr1G075010	0.824512	0.00975291
	HORVU0Hr1G012940	-0.787841	0.00975291
	HORVU4Hr1G050230	-0.855911	0.00979358
	HORVU2Hr1G022540	-1.2201	0.00979838
	HORVU1Hr1G085470	-0.819158	0.00981743
	HORVU6Hr1G072640	1.15587	0.00987482
	HORVU4Hr1G088910	-1.04622	0.00989426
	HORVU7Hr1G091080	-1.32729	0.00993957
	HORVU6Hr1G068490	1.0145	0.00995141
	HORVU6Hr1G072030	1.12637	0.00996537
	HORVU7Hr1G046320	-0.517979	0.00996829
UCs (FDR>0.01)	HORVU5Hr1G123970	1.0046	0.0100303
	HORVU6Hr1G021260	1.10679	0.0100786
	HORVU4Hr1G056640	1.3414	0.0101029
	HORVU1Hr1G009950	0.757334	0.0101251
	HORVU2Hr1G077650	1.26185	0.0103091
	HORVU1Hr1G052700	0.603273	0.0104084
	HORVU2Hr1G089970	1.01675	0.0104151
	HORVU2Hr1G017270	-1.2351	0.0104434
	HORVU6Hr1G084770	-0.769236	0.0104434
	HORVU3Hr1G092820	-1.37913	0.0104821
	HORVU7Hr1G056430	-0.984077	0.0105331
	HORVU3Hr1G109220	-1.04403	0.0105461
	HORVU1Hr1G074860	0.874754	0.0105529
	HORVU2Hr1G098390	-0.954597	0.0107126
	HORVU3Hr1G053350	-1.21296	0.0107374
	HORVU0Hr1G021280	-1.52491	0.0107471
	HORVU2Hr1G080370	0.908165	0.0108069
	HORVU4Hr1G064740	-1.32287	0.0109636
	HORVU5Hr1G037600	0.702405	0.0110428
	HORVU6Hr1G083440	1.16159	0.0110428
	HORVU1Hr1G073510	1.23308	0.0110988
	HORVU7Hr1G090240	-1.05663	0.0112248
	HORVU2Hr1G075810	-0.702167	0.0112259
	HORVU3Hr1G073230	0.761799	0.0112259
	HORVU1Hr1G053050	-0.871538	0.0112489
	HORVU7Hr1G042120	-0.741631	0.0112599
	HORVU2Hr1G112860	-0.71045	0.0113661
	HORVU3Hr1G085720	-0.979832	0.0113927
	HORVU4Hr1G089200	-1.29743	0.0114081
	HORVU5Hr1G023640	1.217	0.0114485
	HORVU7Hr1G083670	0.879412	0.0114932
	HORVU2Hr1G109430	0.747433	0.0115276
	HORVU5Hr1G111480	0.912115	0.0115276
	HORVU7Hr1G115540	-0.88828	0.0115276
	HORVU1Hr1G070270	-0.794224	0.0115814
	HORVU7Hr1G080310	0.796758	0.0116388
	HORVU2Hr1G073320	0.847803	0.0116516
	HORVU0Hr1G004700	0.762937	0.0116516
	HORVU6Hr1G033290	1.10864	0.0117787
	HORVU5Hr1G047420	-1.12894	0.0117919
	HORVU4Hr1G073580	-0.967635	0.0118051
	HORVU7Hr1G080440	-0.708087	0.0118548
	HORVU3Hr1G061010	-0.836573	0.0118604
	HORVU2Hr1G094320	0.87941	0.0118815
	HORVU7Hr1G087210	0.741381	0.0118832
	HORVU4Hr1G008180	-0.693714	0.0120174
	HORVU1Hr1G080820	1.61853	0.0120802
	HORVU5Hr1G014310	-0.791759	0.0120866
	HORVU1Hr1G095140	0.884034	0.012125
	HORVU5Hr1G096780	-0.931581	0.0121344
	HORVU5Hr1G095020	0.795231	0.0121363
	HORVU4Hr1G016010	-1.44876	0.0121363
	HORVU5Hr1G037290	0.801397	0.0122122
	HORVU5Hr1G118420	-1.60938	0.0122122
	HORVU2Hr1G022140	1.32589	0.0122738
	HORVU7Hr1G044150	-0.621339	0.0122738
	HORVU4Hr1G066860	-0.578734	0.0122997
	HORVU5Hr1G063570	1.09257	0.0123035
	HORVU3Hr1G058740	1.11585	0.0123216
	HORVU3Hr1G081270	0.882998	0.0123216
	HORVU2Hr1G076790	0.7612	0.0123224
	HORVU5Hr1G057460	0.886607	0.0123343
	HORVU7Hr1G119060	0.694748	0.0123471
	HORVU1Hr1G012140	-1.07576	0.0124136
	HORVU7Hr1G049960	-0.793778	0.0124267
	HORVU7Hr1G108960	-0.605308	0.0125179
	HORVU7Hr1G038270	0.991555	0.0125241
	HORVU6Hr1G036950	-0.651328	0.0125241
	HORVU7Hr1G056410	0.630378	0.0126131
	HORVU2Hr1G001620	1.57802	0.0126679
	HORVU4Hr1G085480	-1.56838	0.0126679
	HORVU4Hr1G088670	0.802071	0.0127311
	HORVU3Hr1G007420	0.777877	0.0128653
	HORVU4Hr1G073230	1.09907	0.0128653
	HORVU6Hr1G072660	1.54636	0.0128653
	HORVU0Hr1G022310	0.645688	0.0129636
	HORVU4Hr1G009270	-0.735068	0.0129884
	HORVU7Hr1G117320	1.06951	0.0130372
	HORVU4Hr1G042710	1.60548	0.0130372
	HORVU4Hr1G081940	-0.856024	0.0130389
	HORVU6Hr1G054850	-1.32371	0.0130389
	HORVU0Hr1G022020	-1.1479	0.0130389
	HORVU6Hr1G014650	-1.4045	0.0130589
	HORVU4Hr1G008580	-0.673492	0.0131298
	HORVU4Hr1G083360	0.636981	0.0131489
	HORVU6Hr1G077340	-0.600583	0.01316
	HORVU1Hr1G091400	0.790563	0.0132116
	HORVU7Hr1G098510	-0.6858	0.0132388
	HORVU2Hr1G113320	1.56129	0.0132894
	HORVU2Hr1G066100	1.13879	0.0133142
	HORVU2Hr1G037940	1.06116	0.0133523
	HORVU3Hr1G067750	0.658993	0.0133971
	HORVU2Hr1G077110	-0.969963	0.0134179
	HORVU1Hr1G026480	-1.42391	0.0134601
	HORVU3Hr1G094320	-1.37804	0.0135459
	HORVU2Hr1G023260	-1.20183	0.0136057
	HORVU2Hr1G112620	-1.31858	0.0136057
	HORVU6Hr1G007360	1.01788	0.0136057
	HORVU6Hr1G081890	0.867772	0.0136057
	HORVU1Hr1G051780	-1.44965	0.0136167
	HORVU4Hr1G064870	-1.37384	0.013618
	HORVU6Hr1G030390	0.805061	0.0136557
	HORVU5Hr1G109100	0.691626	0.0136949
	HORVU2Hr1G007990	1.53314	0.0137278
	HORVU2Hr1G028510	1.21398	0.0137278
	HORVU6Hr1G076130	0.869698	0.0137355
	HORVU5Hr1G021610	1.21929	0.0137401
	HORVU3Hr1G024210	-0.969726	0.0137877
	HORVU3Hr1G021810	0.929486	0.0138762
	HORVU4Hr1G074480	1.00412	0.0139413
	HORVU4Hr1G014480	-1.41749	0.014022
	HORVU2Hr1G039000	0.733537	0.0140912
	HORVU7Hr1G029950	-1.12134	0.0141281
	HORVU6Hr1G033380	-1.13391	0.014168
	HORVU5Hr1G084100	0.765072	0.0141846
	HORVU6Hr1G071950	0.965293	0.0142211
	HORVU4Hr1G026340	-0.850473	0.0142781
	HORVU1Hr1G070420	-1.48943	0.0142781
	HORVU5Hr1G111620	0.661801	0.014347
	HORVU7Hr1G053230	-1.04092	0.014347
	HORVU1Hr1G014010	1.17655	0.014347
	HORVU7Hr1G108210	-1.13686	0.0143856
	HORVU6Hr1G034380	1.03345	0.0144331
	HORVU2Hr1G099820	-1.5613	0.0145468
	HORVU5Hr1G069480	0.711971	0.0146606
	HORVU2Hr1G029240	0.753607	0.0146943
	HORVU6Hr1G080760	0.812733	0.0148296
	HORVU6Hr1G066050	-0.915619	0.014854
	HORVU4Hr1G061740	0.768818	0.0148925
	HORVU7Hr1G037600	1.36862	0.0149536
	HORVU5Hr1G122530	1.48711	0.0149811
	HORVU6Hr1G083350	1.19896	0.0150077
	HORVU1Hr1G046690	1.08251	0.0150265
	HORVU5Hr1G022550	0.866021	0.0151064
	HORVU2Hr1G017760	-0.834077	0.0152552
	HORVU1Hr1G028430	-1.20824	0.0153049
	HORVU4Hr1G048700	-0.770698	0.0153125
	HORVU0Hr1G022280	-0.844023	0.0153125
	HORVU0Hr1G012050	-1.15009	0.0153338
	HORVU6Hr1G014700	0.715514	0.0153398
	HORVU4Hr1G052450	1.56523	0.0153557
	HORVU2Hr1G073680	1.02629	0.0153655
	HORVU7Hr1G088140	0.759813	0.015369
	HORVU2Hr1G105130	1.03792	0.0154084
	HORVU6Hr1G008870	0.83934	0.0154963
	HORVU2Hr1G040910	0.828619	0.0155019
	HORVU5Hr1G008890	1.36472	0.0155019
	HORVU7Hr1G047130	-0.899726	0.0155019
	HORVU7Hr1G095400	-0.739718	0.0155019
	HORVU4Hr1G074840	1.32197	0.0155019
	HORVU3Hr1G010030	-0.76667	0.0155049
	HORVU4Hr1G074780	-1.28792	0.0155076
	HORVU6Hr1G057630	-0.987464	0.0155102
	HORVU3Hr1G067840	0.968856	0.0155367
	HORVU3Hr1G066390	-1.14893	0.0155564
	HORVU3Hr1G025920	0.558587	0.0156949
	HORVU3Hr1G063620	1.0599	0.0156949
	HORVU5Hr1G026360	1.24625	0.0157387
	HORVU2Hr1G025980	-0.709264	0.0157454
	HORVU3Hr1G034040	-0.806009	0.015823
	HORVU3Hr1G054780	-1.04157	0.0158546
	HORVU3Hr1G005780	-0.913908	0.0159785
	HORVU2Hr1G080630	-0.631573	0.0159875
	HORVU5Hr1G046200	-1.49027	0.0159875
	HORVU4Hr1G001350	0.620257	0.0159875
	HORVU4Hr1G052730	0.764613	0.0160945
	HORVU6Hr1G021520	-0.741333	0.0162061
	HORVU3Hr1G059720	-1.49656	0.0162765
	HORVU1Hr1G072720	-1.00099	0.0162765
	HORVU5Hr1G063630	0.940207	0.0164479
	HORVU2Hr1G076660	0.871786	0.0164639
	HORVU3Hr1G047220	-0.945897	0.0164639
	HORVU7Hr1G020780	-0.715962	0.016473
	HORVU5Hr1G067760	-1.29239	0.0165014
	HORVU3Hr1G009210	-0.553899	0.0165098
	HORVU5Hr1G058890	-1.11436	0.0165098
	HORVU5Hr1G082310	0.773988	0.016533
	HORVU3Hr1G084750	-0.710942	0.0165631
	HORVU3Hr1G107090	-0.933439	0.0165858
	HORVU3Hr1G067990	1.09313	0.0165956
	HORVU1Hr1G088280	-1.27553	0.0165956
	HORVU3Hr1G096860	-1.33043	0.0165978
	HORVU7Hr1G042000	0.802978	0.0166275
	HORVU2Hr1G105650	0.718644	0.016633
	HORVU7Hr1G057740	-1.24129	0.016633
	HORVU2Hr1G028260	0.848371	0.0166859
	HORVU3Hr1G086020	-0.744785	0.0166859
	HORVU6Hr1G066640	-0.952396	0.0167128
	HORVU1Hr1G014800	0.996959	0.0168241
	HORVU6Hr1G011860	-1.05172	0.016877
	HORVU6Hr1G085490	1.24869	0.0169128
	HORVU3Hr1G109180	-1.03573	0.0170153
	HORVU1Hr1G068870	0.600956	0.017051
	HORVU2Hr1G099410	-0.619325	0.0170696
	HORVU7Hr1G065200	1.02007	0.0171811
	HORVU7Hr1G120030	0.909873	0.0172166
	HORVU2Hr1G013450	-1.08413	0.0174937
	HORVU5Hr1G044370	-1.19278	0.0175087
	HORVU3Hr1G027470	0.97882	0.0175339
	HORVU0Hr1G018390	1.49502	0.0175494
	HORVU7Hr1G058120	-0.532301	0.0176313
	HORVU7Hr1G071450	0.84951	0.0176313
	HORVU4Hr1G002540	0.993049	0.0176313
	HORVU1Hr1G070250	-1.33318	0.0176618
	HORVU4Hr1G046480	0.698972	0.0177145
	HORVU4Hr1G072750	-0.894799	0.0177458
	HORVU5Hr1G116590	1.51755	0.0177688
	HORVU2Hr1G056820	0.678519	0.0178048
	HORVU4Hr1G089090	1.11929	0.0178302
	HORVU2Hr1G124880	0.845853	0.0178721
	HORVU5Hr1G009830	0.712553	0.0178721
	HORVU7Hr1G072710	1.05823	0.0178721
	HORVU1Hr1G037270	-1.44458	0.0180441
	HORVU7Hr1G052870	-0.956557	0.0180494
	HORVU4Hr1G006200	-0.75767	0.0180494
	HORVU2Hr1G101100	0.633573	0.0180849
	HORVU4Hr1G074130	-0.979522	0.0180961
	HORVU2Hr1G001160	0.996324	0.0181258
	HORVU5Hr1G059550	-0.758019	0.0182408
	HORVU4Hr1G071270	1.06778	0.0182408
	HORVU5Hr1G060340	1.15241	0.0184113
	HORVU6Hr1G070090	-1.15978	0.0184113
	HORVU6Hr1G005390	0.496448	0.0184927
	HORVU5Hr1G091820	1.13337	0.0186963
	HORVU2Hr1G085650	-0.791545	0.0187227
	HORVU2Hr1G110110	0.856977	0.0187227
	HORVU4Hr1G017140	-0.781238	0.0187227
	HORVU4Hr1G083080	0.581493	0.0187227
	HORVU6Hr1G051650	0.622882	0.0187485
	HORVU3Hr1G050490	0.899164	0.0188081
	HORVU3Hr1G054330	1.28317	0.0188081
	HORVU5Hr1G106640	-1.52903	0.0188081
	HORVU4Hr1G079180	-1.53663	0.0188081
	HORVU6Hr1G058620	-1.35883	0.0188081
	HORVU3Hr1G017100	1.20541	0.0188185
	HORVU2Hr1G027690	1.37303	0.0188264
	HORVU3Hr1G051530	1.08822	0.0188529
	HORVU5Hr1G042390	-1.06794	0.0188529
	HORVU2Hr1G078350	1.09034	0.018863
	HORVU3Hr1G072380	0.716963	0.018863
	HORVU2Hr1G012860	0.539784	0.018892
	HORVU5Hr1G114540	-0.550129	0.018892
	HORVU3Hr1G020500	1.5342	0.0189092
	HORVU1Hr1G067490	1.3958	0.0189125
	HORVU1Hr1G087620	-0.750871	0.018974
	HORVU2Hr1G022820	0.983658	0.0192182
	HORVU4Hr1G010030	-0.852356	0.0192182
	HORVU2Hr1G038740	0.62163	0.0192297
	HORVU5Hr1G106470	-0.978289	0.0193379
	HORVU7Hr1G118450	-0.787257	0.0193387
	HORVU2Hr1G019960	0.582537	0.0194041
	HORVU5Hr1G072770	-0.904028	0.0194041
	HORVU4Hr1G084600	0.789327	0.0194041
	HORVU1Hr1G038180	1.17856	0.0195207
	HORVU3Hr1G077230	0.987227	0.0196868
	HORVU6Hr1G093310	-1.2525	0.0196868
	HORVU1Hr1G091470	-1.11167	0.0197232
	HORVU1Hr1G060740	0.704307	0.0198236
	HORVU1Hr1G062130	-0.826866	0.0198236
	HORVU7Hr1G037180	-0.786398	0.0198355
	HORVU1Hr1G026140	-0.628832	0.0199361
	HORVU5Hr1G001320	0.956419	0.0199689
	HORVU7Hr1G117800	0.618299	0.0199872
	HORVU6Hr1G083620	-0.847387	0.0200751
	HORVU2Hr1G006850	0.901831	0.020086
	HORVU4Hr1G010720	-1.31097	0.0201773
	HORVU6Hr1G073980	0.627449	0.0201961
	HORVU0Hr1G005320	0.575682	0.0202118
	HORVU2Hr1G019810	0.814239	0.0202964
	HORVU4Hr1G012530	-1.06687	0.0203584
	HORVU1Hr1G087460	-0.906483	0.0204833
	HORVU2Hr1G117940	-1.29294	0.0207473
	HORVU5Hr1G005180	-0.595494	0.02075
	HORVU1Hr1G051050	0.997521	0.0207631
	HORVU2Hr1G011200	0.659004	0.0207716
	HORVU6Hr1G015690	-1.00806	0.0207716
	HORVU7Hr1G052580	-0.647321	0.020836
	HORVU1Hr1G071580	-0.779883	0.0208737
	HORVU1Hr1G089830	-1.07602	0.0208737
	HORVU2Hr1G068630	-1.12182	0.0209236
	HORVU3Hr1G006940	1.10144	0.021125
	HORVU1Hr1G029540	1.15268	0.0211622
	HORVU0Hr1G007370	-0.863774	0.0211622
	HORVU2Hr1G123370	-0.75208	0.021177
	HORVU3Hr1G048770	-1.50878	0.021177
	HORVU4Hr1G009190	1.43309	0.021177
	HORVU5Hr1G074900	-0.609889	0.0212455
	HORVU3Hr1G072520	-0.681739	0.0212705
	HORVU4Hr1G000490	-1.18367	0.0213387
	HORVU1Hr1G072590	1.17308	0.0214513
	HORVU2Hr1G019990	-1.46839	0.021507
	HORVU4Hr1G033860	-0.839843	0.021691
	HORVU6Hr1G052560	0.733649	0.0218185
	HORVU2Hr1G086950	1.50653	0.0218341
	HORVU2Hr1G121440	-0.758895	0.0218341
	HORVU0Hr1G018290	-1.13269	0.0219585
	HORVU7Hr1G097010	0.698632	0.0220881
	HORVU3Hr1G085210	-0.778507	0.0221209
	HORVU5Hr1G093160	1.14846	0.0221242
	HORVU1Hr1G026530	0.929863	0.0221242
	HORVU2Hr1G002720	0.859116	0.0222524
	HORVU2Hr1G005320	-0.748111	0.0222524
	HORVU3Hr1G101930	0.889913	0.0222524
	HORVU2Hr1G119680	-1.22942	0.0222623
	HORVU6Hr1G025280	0.731178	0.0223839
	HORVU5Hr1G040990	-0.939512	0.0224304
	HORVU1Hr1G000600	-0.919683	0.0224573
	HORVU2Hr1G126100	-0.970614	0.0225084
	HORVU6Hr1G093180	-0.860904	0.0226012
	HORVU7Hr1G043690	0.72706	0.0226891
	HORVU3Hr1G020140	-1.36568	0.0227384
	HORVU7Hr1G079430	0.874873	0.0227384
	HORVU3Hr1G030040	-0.809513	0.0227942
	HORVU2Hr1G105140	0.690659	0.0229491
	HORVU3Hr1G105420	-1.2918	0.0229491
	HORVU5Hr1G109260	-0.799433	0.0229491
	HORVU7Hr1G070870	0.868401	0.0229491
	HORVU7Hr1G086350	1.12073	0.02301
	HORVU2Hr1G091320	-0.551557	0.0233496
	HORVU4Hr1G059950	-0.859453	0.0233904
	HORVU6Hr1G073040	-0.5526	0.023792
	HORVU1Hr1G039600	-0.967273	0.023792
	HORVU5Hr1G079660	-0.887083	0.0238601
	HORVU5Hr1G018050	1.04144	0.0243982
	HORVU7Hr1G030670	0.98271	0.0245256
	HORVU6Hr1G081000	0.636476	0.0245256
	HORVU1Hr1G065150	-0.640481	0.0245442
	HORVU7Hr1G010250	-0.646093	0.0245819
	HORVU1Hr1G072990	-0.647592	0.0245991
	HORVU2Hr1G030610	-0.630201	0.0246345
	HORVU6Hr1G008780	-0.758543	0.0246345
	HORVU5Hr1G045440	-0.550972	0.0246404
	HORVU1Hr1G027700	-1.45094	0.0246723
	HORVU7Hr1G019830	0.693031	0.0246761
	HORVU6Hr1G088370	-0.83347	0.024745
	HORVU4Hr1G026030	-1.21028	0.0248592
	HORVU5Hr1G081460	1.07453	0.0249365
	HORVU6Hr1G087420	0.746557	0.0249365
	HORVU5Hr1G076510	-1.05783	0.0249479
	HORVU4Hr1G017450	-0.716627	0.0250563
	HORVU3Hr1G095450	0.948948	0.0252662
	HORVU5Hr1G095220	-1.21074	0.0252662
	HORVU1Hr1G043940	0.707613	0.0253134
	HORVU7Hr1G074580	0.790671	0.0255997
	HORVU2Hr1G007760	0.946327	0.025629
	HORVU2Hr1G034280	-1.28312	0.0257395
	HORVU1Hr1G019600	0.7758	0.0258054
	HORVU1Hr1G053310	1.03815	0.0258054
	HORVU4Hr1G002820	-1.05339	0.0258055
	HORVU7Hr1G099560	-0.621185	0.0258116
	HORVU5Hr1G014920	-0.820533	0.0258683
	HORVU3Hr1G029670	0.686806	0.0258735
	HORVU7Hr1G039810	-1.19922	0.0258735
	ENSRNA049460237	1.08836	0.0258912
	HORVU1Hr1G056120	0.862121	0.0258964
	HORVU5Hr1G014290	-0.588864	0.0259747
	HORVU4Hr1G006530	0.744347	0.0260815
	HORVU7Hr1G026720	-1.27106	0.026125
	HORVU5Hr1G011780	-0.928552	0.026127
	HORVU5Hr1G030040	0.766727	0.026145
	HORVU4Hr1G069480	-0.850274	0.0261976
	HORVU1Hr1G018720	0.672942	0.0263112
	HORVU6Hr1G070600	-0.571775	0.0265533
	HORVU5Hr1G067280	-0.836624	0.0265879
	HORVU4Hr1G056820	0.820765	0.0267477
	HORVU6Hr1G036830	0.617696	0.0267547
	HORVU3Hr1G070660	1.16553	0.0269354
	HORVU1Hr1G037550	0.684394	0.0269354
	HORVU1Hr1G083210	-1.47102	0.0269354
	HORVU5Hr1G037320	1.00592	0.0269688
	HORVU6Hr1G076110	-0.528355	0.0269688
	HORVU2Hr1G102660	1.41349	0.0270003
	HORVU2Hr1G007570	-0.633779	0.0271454
	HORVU2Hr1G014150	-1.02331	0.027227
	HORVU1Hr1G047110	0.740089	0.0272716
	HORVU3Hr1G002920	-0.897998	0.0273376
	HORVU2Hr1G116730	0.932901	0.0273443
	HORVU0Hr1G016430	-0.682022	0.0273772
	HORVU7Hr1G088030	0.819883	0.0276344
	HORVU6Hr1G029520	0.751767	0.0277902
	HORVU1Hr1G000810	-1.3436	0.0277902
	HORVU1Hr1G013210	-0.560696	0.0279835
	HORVU1Hr1G092250	-1.12246	0.0279835
	HORVU1Hr1G094880	0.958881	0.028143
	HORVU7Hr1G038980	0.716563	0.028265
	HORVU6Hr1G044840	1.02316	0.0282731
	HORVU1Hr1G049900	-0.861762	0.0282731
	HORVU1Hr1G066520	0.609367	0.0283224
	HORVU5Hr1G001090	-0.800205	0.0283394
	HORVU7Hr1G078850	-0.64283	0.0283394
	HORVU0Hr1G022520	1.40029	0.0283484
	HORVU3Hr1G088970	0.802849	0.0284386
	HORVU5Hr1G028460	0.76329	0.0284726
	HORVU2Hr1G106020	0.533687	0.0285032
	HORVU3Hr1G001140	0.890102	0.0285796
	HORVU2Hr1G069950	0.932631	0.0286337
	HORVU2Hr1G104690	-1.10448	0.0286612
	HORVU5Hr1G069600	1.03561	0.0286612
	HORVU3Hr1G090250	-1.1142	0.0286819
	HORVU6Hr1G070350	0.564047	0.0287109
	HORVU7Hr1G106150	0.77085	0.0287319
	HORVU1Hr1G019500	-1.05936	0.0287319
	HORVU5Hr1G094490	1.45955	0.0287786
	HORVU5Hr1G104380	0.720211	0.0290729
	HORVU2Hr1G082420	-0.600974	0.0291003
	HORVU5Hr1G117760	-0.733117	0.0291003
	HORVU4Hr1G083020	-0.813565	0.0291003
	HORVU6Hr1G034110	1.02064	0.0291003
	HORVU2Hr1G028520	-0.966716	0.0291375
	HORVU7Hr1G007580	1.0006	0.0291375
	HORVU1Hr1G024860	0.96698	0.0291375
	HORVU1Hr1G090130	-1.0792	0.0292471
	HORVU1Hr1G055890	-0.607348	0.0293359
	HORVU4Hr1G056630	1.19528	0.0293736
	HORVU3Hr1G084970	-1.14233	0.0294313
	HORVU7Hr1G070780	-0.635393	0.0295374
	HORVU3Hr1G002710	-0.737262	0.0295569
	HORVU7Hr1G080850	0.792485	0.0296786
	HORVU2Hr1G001320	0.821838	0.0298074
	HORVU5Hr1G080110	-1.11189	0.0298074
	HORVU6Hr1G069570	-0.577147	0.0298074
	HORVU6Hr1G014750	0.889534	0.0299505
	HORVU3Hr1G019340	0.840773	0.0300091
	HORVU3Hr1G069430	-1.04214	0.0301469
	HORVU3Hr1G080100	0.673666	0.0302058
	HORVU3Hr1G091020	1.44288	0.0302965
	HORVU5Hr1G094460	0.834893	0.0303199
	HORVU4Hr1G075990	0.693023	0.0303483
	HORVU7Hr1G041320	-1.42703	0.0303922
	HORVU1Hr1G018150	0.820381	0.0303922
	HORVU2Hr1G015360	-0.63988	0.0304195
	HORVU3Hr1G009240	-0.792371	0.0304195
	HORVU3Hr1G097140	-0.797978	0.0304852
	HORVU3Hr1G117890	-0.80008	0.0304852
	HORVU0Hr1G016350	0.814078	0.0304943
	HORVU5Hr1G084860	-0.962434	0.0307893
	HORVU5Hr1G103380	-0.585693	0.0308636
	HORVU2Hr1G006910	0.626787	0.0310091
	HORVU2Hr1G018190	-0.857283	0.0310091
	HORVU1Hr1G021550	-0.639199	0.0310091
	HORVU5Hr1G098290	-0.901214	0.0311742
	HORVU3Hr1G023160	1.14735	0.031222
	HORVU3Hr1G095620	-1.30067	0.0313297
	HORVU6Hr1G052810	1.21484	0.0313466
	HORVU2Hr1G003390	-1.1454	0.0317387
	HORVU5Hr1G035820	0.875022	0.0322391
	HORVU2Hr1G031740	-1.10806	0.032309
	HORVU0Hr1G039040	0.963025	0.0323117
	ENSRNA049489392	-1.13874	0.0323233
	HORVU4Hr1G076610	0.889017	0.0324731
	HORVU1Hr1G080860	-1.43778	0.032505
	HORVU1Hr1G065570	-1.0949	0.0325693
	HORVU4Hr1G057550	-0.7261	0.0328422
	ENSRNA050017576	1.17203	0.0328753
	HORVU4Hr1G057290	0.783323	0.032924
	HORVU1Hr1G079370	0.815466	0.0329902
	HORVU5Hr1G097710	0.886985	0.0330126
	HORVU4Hr1G022580	-0.55173	0.0330126
	HORVU2Hr1G073330	0.736909	0.0330651
	HORVU2Hr1G089620	-1.40551	0.0330651
	HORVU5Hr1G103330	0.664067	0.0330651
	HORVU2Hr1G041180	0.536704	0.0331432
	HORVU1Hr1G046740	1.3779	0.033269
	HORVU3Hr1G012850	0.850256	0.033296
	HORVU4Hr1G060330	-1.11257	0.033296
	HORVU1Hr1G001950	-1.42702	0.0334456
	HORVU4Hr1G028600	0.561927	0.0335804
	HORVU1Hr1G087760	1.28114	0.033781
	HORVU6Hr1G060250	-0.982305	0.03379
	HORVU2Hr1G073370	-0.602119	0.0338147
	HORVU1Hr1G066530	-0.907452	0.0338147
	HORVU6Hr1G034050	0.829495	0.0338198
	HORVU1Hr1G018600	-1.39338	0.0338198
	HORVU7Hr1G049080	0.882507	0.0341909
	HORVU1Hr1G088920	-1.00473	0.0341988
	HORVU7Hr1G035430	-0.838708	0.0342402
	HORVU2Hr1G124930	-0.917143	0.0342476
	HORVU5Hr1G076250	-0.731653	0.0342476
	HORVU0Hr1G017380	0.839798	0.0342476
	HORVU3Hr1G026920	-0.898353	0.0344093
	HORVU5Hr1G073970	0.598965	0.0344306
	HORVU7Hr1G096250	0.629756	0.0344306
	HORVU3Hr1G082000	1.01045	0.0344736
	HORVU5Hr1G045180	-0.834265	0.0344798
	HORVU7Hr1G027710	0.886715	0.034633
	HORVU4Hr1G068500	0.864194	0.034633
	HORVU7Hr1G074690	-0.632	0.0350395
	HORVU0Hr1G000620	-0.916291	0.0352144
	HORVU5Hr1G107260	0.841213	0.0352422
	HORVU1Hr1G075160	0.767574	0.0352422
	HORVU3Hr1G095730	-1.33494	0.0352672
	HORVU7Hr1G112410	0.688032	0.0354253
	HORVU6Hr1G071920	-1.16614	0.0354655
	HORVU1Hr1G020430	1.12746	0.0356055
	HORVU1Hr1G060620	-1.15191	0.0356741
	HORVU6Hr1G003910	0.812482	0.035684
	HORVU2Hr1G021550	-0.926317	0.0358724
	HORVU2Hr1G046360	1.22209	0.0359577
	HORVU1Hr1G036490	1.4163	0.0361876
	HORVU4Hr1G076970	-0.863849	0.0362284
	HORVU2Hr1G045140	0.817474	0.0362945
	HORVU5Hr1G078110	0.869957	0.0364183
	HORVU5Hr1G125710	-1.01009	0.036496
	HORVU5Hr1G085680	0.929261	0.0365123
	HORVU0Hr1G009380	-0.919397	0.0365123
	HORVU6Hr1G084390	-0.628011	0.0367366
	HORVU3Hr1G090080	0.751286	0.0367425
	HORVU2Hr1G061910	-1.37529	0.0367728
	HORVU7Hr1G113850	-0.641118	0.036794
	HORVU6Hr1G004860	0.645873	0.0368399
	HORVU6Hr1G000830	0.7776	0.0368508
	HORVU7Hr1G053780	-1.14004	0.0369028
	HORVU7Hr1G100230	-0.560508	0.0369761
	HORVU6Hr1G082990	1.17782	0.0370544
	HORVU5Hr1G052280	0.531637	0.0371835
	HORVU5Hr1G054880	-0.948889	0.0373481
	HORVU1Hr1G046990	-0.841472	0.0374432
	HORVU7Hr1G049580	-1.38873	0.0374464
	HORVU2Hr1G015470	-0.669785	0.037474
	HORVU7Hr1G036780	-0.789755	0.037474
	HORVU3Hr1G066810	-0.813271	0.037598
	HORVU3Hr1G068500	0.938528	0.0376677
	HORVU3Hr1G056370	-1.32316	0.0381136
	HORVU4Hr1G060870	-1.12647	0.0382132
	HORVU4Hr1G013420	-1.03246	0.038231
	HORVU3Hr1G089880	0.941965	0.0383095
	HORVU2Hr1G116390	0.518819	0.0387216
	HORVU7Hr1G075700	0.721604	0.0388604
	HORVU3Hr1G093620	-0.615754	0.0389599
	HORVU3Hr1G077490	0.951923	0.0391713
	HORVU0Hr1G000710	-1.03565	0.0391713
	HORVU5Hr1G051310	-0.622399	0.0393828
	HORVU1Hr1G063220	0.616439	0.0393828
	HORVU4Hr1G054880	1.07451	0.0395055
	HORVU6Hr1G064470	0.816635	0.0395055
	HORVU6Hr1G070420	0.481295	0.0395055
	HORVU3Hr1G091200	0.696088	0.0396107
	HORVU7Hr1G098280	-0.789431	0.03969
	HORVU4Hr1G049150	0.595943	0.0398115
	HORVU6Hr1G084650	0.500471	0.0398115
	HORVU3Hr1G022340	-0.703719	0.039833
	HORVU7Hr1G040370	-0.906904	0.0400013
	HORVU3Hr1G090820	-0.820814	0.0400074
	HORVU1Hr1G092950	0.671232	0.0400811
	HORVU5Hr1G053930	0.529638	0.040202
	HORVU3Hr1G085860	0.913556	0.0402277
	HORVU5Hr1G068070	0.754253	0.0402277
	HORVU4Hr1G078020	0.884288	0.0402277
	HORVU1Hr1G063470	-1.23328	0.0402277
	HORVU5Hr1G051970	-1.09641	0.0403285
	HORVU2Hr1G108010	0.619469	0.040367
	HORVU4Hr1G009060	-0.891954	0.040442
	HORVU7Hr1G098220	-1.04106	0.0404783
	HORVU7Hr1G075300	0.850861	0.040659
	HORVU1Hr1G081980	0.661721	0.0406798
	HORVU1Hr1G081770	0.868608	0.0411381
	HORVU2Hr1G037000	-0.774422	0.0412346
	HORVU2Hr1G095970	-1.28367	0.0412346
	HORVU4Hr1G026770	-0.945062	0.0412346
	HORVU6Hr1G047870	-0.926301	0.0412346
	HORVU0Hr1G013800	-0.835404	0.0412346
	HORVU3Hr1G092860	-0.689351	0.0413211
	HORVU7Hr1G095220	0.807267	0.0413481
	HORVU7Hr1G090850	0.711465	0.0413566
	HORVU5Hr1G022510	0.587545	0.0415111
	HORVU7Hr1G115460	0.859227	0.0416043
	HORVU5Hr1G124980	1.22924	0.0416119
	HORVU6Hr1G091660	-1.24941	0.0416119
	HORVU4Hr1G080940	0.842818	0.0416982
	HORVU7Hr1G088980	-0.714709	0.0416996
	HORVU4Hr1G056050	-0.557694	0.0416996
	HORVU5Hr1G084510	1.00496	0.0418394
	HORVU4Hr1G085150	-1.28897	0.0418394
	HORVU5Hr1G018660	0.64094	0.0421302
	HORVU6Hr1G051740	-0.810534	0.042397
	HORVU3Hr1G071320	-0.653474	0.0424444
	HORVU1Hr1G066610	0.609945	0.0424825
	HORVU5Hr1G023480	-0.796125	0.0425277
	HORVU4Hr1G065270	-1.36181	0.0426384
	HORVU5Hr1G084260	-0.858671	0.042694
	HORVU5Hr1G061870	0.908354	0.042731
	HORVU5Hr1G006550	-1.29063	0.0429245
	HORVU0Hr1G016480	-0.852112	0.0429485
	HORVU4Hr1G016470	0.737496	0.0430064
	HORVU1Hr1G051740	0.783234	0.0430064
	HORVU7Hr1G104220	0.480705	0.0430659
	HORVU3Hr1G073670	0.652825	0.0431221
	HORVU3Hr1G074950	-1.0164	0.0431221
	HORVU3Hr1G094300	-1.19648	0.0431221
	HORVU5Hr1G022050	-0.834251	0.0431221
	HORVU1Hr1G087320	-0.540477	0.0431221
	HORVU7Hr1G049860	0.658024	0.0431287
	HORVU7Hr1G084240	0.73814	0.0433398
	HORVU6Hr1G064340	-0.74937	0.0433398
	HORVU6Hr1G023070	0.856313	0.0433405
	HORVU1Hr1G090860	0.750538	0.0433756
	HORVU7Hr1G115330	-0.758223	0.0434328
	HORVU3Hr1G047230	0.935767	0.0436648
	HORVU5Hr1G071270	-0.880127	0.0438633
	HORVU7Hr1G108830	1.18644	0.0439979
	HORVU7Hr1G113530	0.709849	0.0439979
	HORVU4Hr1G056740	0.698885	0.0439979
	HORVU3Hr1G011870	-1.15327	0.0440625
	HORVU4Hr1G012440	0.654206	0.0440625
	HORVU3Hr1G010100	-1.18532	0.0440994
	HORVU1Hr1G068320	-0.905407	0.0442265
	HORVU5Hr1G068100	1.22954	0.0443065
	HORVU1Hr1G035130	0.911621	0.0444796
	HORVU3Hr1G021220	-1.01638	0.0445312
	HORVU3Hr1G073630	0.677007	0.0445312
	HORVU3Hr1G098340	-0.831825	0.0445312
	HORVU5Hr1G054180	0.810622	0.0445312
	HORVU6Hr1G062430	1.20521	0.0445312
	HORVU2Hr1G121820	-1.35568	0.044701
	HORVU5Hr1G098920	1.11921	0.0447833
	HORVU5Hr1G047630	1.13278	0.0448391
	HORVU6Hr1G087780	0.870188	0.0448391
	HORVU6Hr1G075590	-0.598904	0.0448957
	HORVU6Hr1G092740	-1.31372	0.0449295
	HORVU5Hr1G081810	1.12727	0.0451803
	HORVU5Hr1G098740	0.475051	0.0451803
	HORVU1Hr1G090430	-0.6287	0.0452319
	HORVU5Hr1G075200	0.544474	0.0453895
	HORVU7Hr1G114510	-0.728461	0.0454167
	HORVU6Hr1G092960	0.818381	0.0456249
	HORVU3Hr1G060390	-0.643748	0.0457263
	HORVU4Hr1G070220	0.533977	0.0458045
	HORVU5Hr1G104750	1.36937	0.0458438
	HORVU5Hr1G036250	0.458035	0.0459325
	HORVU1Hr1G004720	1.11744	0.0459325
	HORVU4Hr1G082740	-0.869261	0.0459527
	HORVU1Hr1G007810	0.756464	0.0459751
	HORVU2Hr1G107740	0.864706	0.0460375
	HORVU7Hr1G089510	-0.611555	0.0460375
	HORVU6Hr1G067300	0.572252	0.046145
	HORVU6Hr1G078700	0.986157	0.0462409
	HORVU5Hr1G060060	-0.865168	0.0462496
	HORVU6Hr1G006560	-0.702574	0.0463598
	HORVU3Hr1G079540	0.656782	0.0463624
	HORVU7Hr1G102030	0.727278	0.0463837
	HORVU2Hr1G048010	1.02265	0.0464516
	HORVU7Hr1G117970	-0.631504	0.0464516
	HORVU2Hr1G081540	-1.10752	0.0464627
	HORVU5Hr1G088350	0.86051	0.0465294
	HORVU3Hr1G074390	1.01211	0.0466125
	HORVU4Hr1G056120	0.791501	0.0466716
	HORVU1Hr1G039250	0.632806	0.0467897
	HORVU4Hr1G055910	1.01127	0.046793
	HORVU4Hr1G020770	0.735066	0.0468129
	HORVU2Hr1G031450	0.475603	0.0469952
	HORVU2Hr1G091170	1.04745	0.0469952
	HORVU5Hr1G010440	1.21048	0.0469952
	HORVU2Hr1G020690	0.91823	0.0472174
	HORVU2Hr1G096890	0.946368	0.0472699
	HORVU7Hr1G086170	1.1023	0.0473081
	HORVU5Hr1G099820	-0.884763	0.0476774
	HORVU6Hr1G080870	-0.569765	0.0478013
	HORVU1Hr1G047220	1.00524	0.0478918
	HORVU6Hr1G089310	-0.768834	0.0480192
	HORVU6Hr1G076860	0.853904	0.0481867
	HORVU1Hr1G051410	0.943721	0.0482653
	HORVU1Hr1G053340	-0.672339	0.0482653
	HORVU3Hr1G025400	1.31234	0.0483314
	HORVU3Hr1G105380	-0.648724	0.0483574
	HORVU2Hr1G079020	0.682911	0.048381
	HORVU5Hr1G088760	-0.475114	0.048381
	HORVU6Hr1G034350	1.04503	0.048381
	HORVU3Hr1G000160	1.14175	0.0485314
	HORVU3Hr1G093140	-1.35233	0.0485491
	HORVU7Hr1G105880	-0.526997	0.0485491
	HORVU1Hr1G021160	-1.15272	0.0485491
	HORVU3Hr1G067760	0.692795	0.0485671
	HORVU4Hr1G000950	-1.15125	0.0486495
	HORVU3Hr1G061850	-0.710384	0.0487454
	HORVU2Hr1G108050	0.818774	0.0488338
	HORVU7Hr1G060970	-0.755768	0.0488338
	HORVU5Hr1G111410	0.684539	0.0488666
	HORVU5Hr1G112970	-1.22566	0.0488783
	HORVU5Hr1G068230	-0.85867	0.0488914
	HORVU5Hr1G018930	0.948447	0.049179
	HORVU4Hr1G020660	0.745965	0.0494352
	HORVU2Hr1G032680	-0.942099	0.0494471
	HORVU5Hr1G025760	1.0058	0.0494477
	HORVU7Hr1G043490	1.27066	0.0494844
	HORVU7Hr1G023980	-0.676499	0.0495896
	HORVU4Hr1G068760	0.62191	0.0495896
	HORVU4Hr1G088080	-0.752063	0.0495896
	HORVU1Hr1G082190	-1.30788	0.049759
	HORVU4Hr1G054970	0.621819	0.0499
	HORVU6Hr1G056570	0.822413	0.0499156
	HORVU5Hr1G046900	-0.908585	0.0499418
	HORVU3Hr1G019360	-0.82832	0.0501291
	HORVU1Hr1G063700	0.885105	0.0501291
	HORVU4Hr1G074270	0.855354	0.0501855
	HORVU4Hr1G090720	-0.750582	0.0501855
	HORVU5Hr1G098440	1.16468	0.0503195
	HORVU5Hr1G061990	0.89416	0.0507146
	HORVU0Hr1G031170	-1.23053	0.0508878
	HORVU2Hr1G089050	1.13668	0.0509196
	HORVU5Hr1G036460	0.608599	0.0509691
	HORVU7Hr1G018230	-1.15262	0.0509691
	HORVU3Hr1G017410	0.605971	0.0511228
	HORVU2Hr1G126230	-0.629543	0.0511573
	HORVU7Hr1G020620	1.19201	0.0514032
	HORVU1Hr1G048760	0.775538	0.0516367
	HORVU4Hr1G063790	0.9602	0.0517812
	HORVU6Hr1G092290	-0.731067	0.0518908
	HORVU2Hr1G050790	-0.666912	0.0518913
	HORVU5Hr1G096420	-0.851127	0.0518995
	HORVU7Hr1G114400	-0.704564	0.0518995
	HORVU4Hr1G024430	-0.614567	0.0518995
	HORVU6Hr1G069380	-1.34228	0.0518995
	HORVU1Hr1G041630	-0.901731	0.0518995
	HORVU1Hr1G017120	0.480978	0.0520299
	HORVU7Hr1G008070	0.573444	0.0521583
	HORVU3Hr1G011850	-1.08246	0.0522043
	HORVU7Hr1G090880	1.1516	0.0522415
	HORVU4Hr1G034200	0.570235	0.0523655
	HORVU4Hr1G055160	-0.890043	0.0523655
	HORVU6Hr1G076450	0.622682	0.0523692
	HORVU3Hr1G062570	-0.665485	0.0524409
	HORVU7Hr1G109750	1.14329	0.0524818
	HORVU1Hr1G036440	1.13096	0.0530757
	HORVU5Hr1G037440	0.618	0.0531334
	HORVU2Hr1G065080	-0.735798	0.0531467
	HORVU2Hr1G009580	0.578497	0.0532042
	HORVU3Hr1G089370	1.07822	0.0532042
	HORVU1Hr1G053840	-0.572958	0.0532042
	HORVU1Hr1G056570	-1.32158	0.0532052
	HORVU2Hr1G111540	1.21627	0.0533546
	HORVU7Hr1G021890	-0.693769	0.0534399
	HORVU2Hr1G077890	0.968299	0.053558
	HORVU7Hr1G008700	1.08473	0.0538248
	HORVU6Hr1G091130	-0.599848	0.0538535
	HORVU5Hr1G069090	-0.782322	0.0540322
	HORVU4Hr1G015550	-0.651255	0.0540437
	HORVU1Hr1G085730	0.648498	0.0540945
	HORVU4Hr1G021390	-0.909768	0.0541439
	HORVU2Hr1G085000	0.763923	0.0543997
	HORVU4Hr1G085510	0.583132	0.0544131
	HORVU3Hr1G025020	1.00238	0.0544624
	HORVU2Hr1G087500	-0.694128	0.054516
	HORVU7Hr1G098320	-0.587822	0.054644
	HORVU1Hr1G061010	-0.569405	0.054644
	HORVU5Hr1G110120	-0.55782	0.0547404
	HORVU2Hr1G077080	-0.507427	0.0548167
	HORVU2Hr1G079040	-1.11618	0.0548548
	HORVU2Hr1G075230	-1.32876	0.054965
	HORVU1Hr1G066770	-0.855763	0.0550189
	HORVU6Hr1G061220	0.666767	0.0552155
	HORVU3Hr1G084420	1.12492	0.0552248
	HORVU5Hr1G024410	-0.437553	0.0552527
	HORVU5Hr1G088360	0.828446	0.0556008
	HORVU5Hr1G009350	0.952273	0.0556425
	HORVU3Hr1G093760	-0.906041	0.0557579
	HORVU4Hr1G069660	-0.741352	0.0557949
	HORVU3Hr1G048820	-0.925536	0.0558485
	HORVU3Hr1G054600	0.881456	0.0558485
	HORVU4Hr1G085970	-0.757615	0.0558485
	HORVU6Hr1G072390	1.31785	0.056446
	HORVU5Hr1G109250	-0.800447	0.0565631
	HORVU7Hr1G078690	-0.970542	0.0565631
	HORVU4Hr1G028610	0.887496	0.0565631
	HORVU5Hr1G062050	-0.628638	0.0566313
	HORVU4Hr1G078500	-0.835408	0.0567559
	HORVU1Hr1G009920	-0.633286	0.0567631
	HORVU3Hr1G043390	0.599685	0.0567744
	HORVU4Hr1G016940	0.660944	0.0568356
	HORVU6Hr1G046420	0.697318	0.0568356
	HORVU6Hr1G056950	-0.764701	0.0568356
	HORVU6Hr1G067930	0.706113	0.0568383
	HORVU1Hr1G017900	-0.772261	0.0568537
	HORVU3Hr1G073960	-0.583705	0.0568725
	HORVU4Hr1G028910	-0.671431	0.0569367
	HORVU6Hr1G052140	-0.825339	0.0572166
	HORVU2Hr1G063510	0.561408	0.0572672
	HORVU7Hr1G079310	0.741415	0.0574251
	HORVU3Hr1G071340	0.963232	0.057726
	HORVU2Hr1G026340	-0.514336	0.0577794
	HORVU3Hr1G029770	0.818861	0.05795
	HORVU2Hr1G114230	-1.31449	0.0581103
	HORVU2Hr1G006280	-0.481131	0.0581502
	HORVU7Hr1G039780	-0.512711	0.0581502
	HORVU1Hr1G075780	1.01003	0.0581502
	HORVU7Hr1G002110	-0.671526	0.0581505
	HORVU7Hr1G035670	-0.69329	0.0581572
	HORVU1Hr1G077420	-1.16608	0.0582368
	HORVU7Hr1G046970	-0.732493	0.0582589
	HORVU5Hr1G034530	-0.685057	0.0583791
	HORVU6Hr1G088140	0.927218	0.0585512
	HORVU2Hr1G060770	-0.621455	0.0585599
	HORVU3Hr1G077400	1.12686	0.0585599
	HORVU3Hr1G113640	-0.822927	0.0585599
	HORVU5Hr1G106010	-0.908196	0.0587559
	HORVU7Hr1G103510	-0.598351	0.0587559
	HORVU2Hr1G088480	0.780872	0.0588386
	HORVU0Hr1G000780	-0.746726	0.0592637
	HORVU0Hr1G016170	-0.658253	0.05945
	HORVU6Hr1G067880	1.19735	0.0594987
	HORVU5Hr1G109880	0.7364	0.0595521
	HORVU5Hr1G076710	-0.990125	0.0596125
	HORVU4Hr1G081600	0.541848	0.0598547
	HORVU4Hr1G005670	0.726829	0.0601423
	HORVU7Hr1G112910	0.797175	0.0602197
	HORVU2Hr1G069470	-0.58357	0.0603303
	HORVU5Hr1G092790	0.779053	0.0603303
	HORVU4Hr1G078580	0.760314	0.0603303
	HORVU6Hr1G022590	1.2395	0.0603303
	HORVU0Hr1G003480	0.705833	0.0603303
	HORVU3Hr1G074850	1.03324	0.0603832
	HORVU1Hr1G075150	-0.522972	0.0603832
	HORVU3Hr1G040920	-0.719927	0.0604332
	HORVU3Hr1G050320	0.925326	0.0604765
	HORVU5Hr1G111000	-1.30894	0.0605462
	HORVU2Hr1G109330	0.868763	0.060668
	HORVU3Hr1G109230	-0.868285	0.0607331
	HORVU2Hr1G032920	-0.779473	0.0607347
	HORVU1Hr1G084700	0.77113	0.0608342
	HORVU5Hr1G048010	0.521735	0.0609115
	HORVU4Hr1G073650	1.08741	0.0609115
	HORVU7Hr1G083220	0.70161	0.0609669
	HORVU4Hr1G069210	0.465272	0.0609669
	HORVU2Hr1G087460	-1.30641	0.0611038
	HORVU2Hr1G030660	-1.24166	0.0611971
	HORVU2Hr1G109030	-0.566753	0.0611971
	HORVU3Hr1G007210	1.0229	0.0611971
	HORVU3Hr1G052880	-0.763138	0.0611971
	HORVU3Hr1G065390	-0.7191	0.0611971
	HORVU5Hr1G046250	-0.54863	0.0611971
	HORVU5Hr1G057330	-0.681737	0.0611971
	HORVU7Hr1G122120	1.0168	0.0611971
	HORVU1Hr1G000010	-0.607904	0.0611971
	HORVU1Hr1G021150	-0.650701	0.0611971
	HORVU1Hr1G030200	-0.474864	0.0611971
	HORVU3Hr1G094100	1.18849	0.0613043
	HORVU4Hr1G011280	-0.603506	0.0613822
	HORVU7Hr1G082560	0.609358	0.0615682
	HORVU1Hr1G010250	0.545342	0.0615682
	HORVU3Hr1G109930	-1.11305	0.0616968
	HORVU2Hr1G114900	-0.975682	0.0617794
	HORVU2Hr1G045490	0.529785	0.0618256
	HORVU5Hr1G104160	0.720592	0.0618256
	HORVU7Hr1G012840	-0.742875	0.0618256
	HORVU7Hr1G098830	-0.898383	0.0618256
	HORVU4Hr1G022420	-0.534374	0.0618256
	HORVU1Hr1G088870	-0.514176	0.0620154
	HORVU5Hr1G019880	-1.17687	0.0621798
	HORVU7Hr1G119340	-1.2502	0.0622572
	HORVU3Hr1G086190	0.460254	0.0627788
	HORVU5Hr1G015390	0.999898	0.0628933
	HORVU2Hr1G103520	0.686434	0.0629499
	HORVU3Hr1G005990	-1.29432	0.0629499
	HORVU3Hr1G037600	0.624688	0.0629499
	HORVU3Hr1G071770	0.652904	0.0629499
	HORVU5Hr1G029110	0.657347	0.0629499
	HORVU2Hr1G068120	0.676493	0.0629733
	HORVU4Hr1G008870	0.784737	0.0630127
	HORVU2Hr1G099810	0.59386	0.0630156
	HORVU2Hr1G080720	1.00325	0.0630462
	HORVU7Hr1G043590	0.867251	0.0630727
	HORVU5Hr1G066190	-0.600007	0.0630763
	HORVU1Hr1G003270	0.914243	0.0632041
	HORVU3Hr1G018130	1.11329	0.0634971
	HORVU1Hr1G063740	-0.838997	0.0636063
	HORVU6Hr1G001060	0.636003	0.0636817
	HORVU7Hr1G058220	-1.24978	0.0638394
	HORVU5Hr1G068550	1.28131	0.063862
	HORVU2Hr1G109010	0.855518	0.0639087
	HORVU3Hr1G113120	-0.774817	0.0639087
	HORVU5Hr1G045700	0.791979	0.0639087
	HORVU2Hr1G039510	0.484276	0.0639572
	HORVU7Hr1G085750	-0.633566	0.064628
	HORVU4Hr1G034650	0.80544	0.064628
	HORVU6Hr1G063560	0.690406	0.0647799
	HORVU7Hr1G118340	1.02062	0.0648543
	HORVU6Hr1G083160	0.635638	0.0648548
	HORVU6Hr1G072540	0.672198	0.065114
	HORVU1Hr1G086380	0.998302	0.0652341
	HORVU0Hr1G017110	-0.848568	0.0652341
	HORVU1Hr1G055900	-0.60799	0.0655815
	HORVU7Hr1G093630	0.540555	0.0656204
	HORVU7Hr1G118500	0.907273	0.0656204
	HORVU1Hr1G064890	0.66908	0.0657803
	HORVU1Hr1G010230	0.503143	0.0658753
	HORVU3Hr1G006000	0.623007	0.0659638
	HORVU2Hr1G114260	-0.547548	0.0660161
	HORVU2Hr1G073400	-1.28707	0.0660415
	HORVU4Hr1G002570	1.19086	0.0660415
	HORVU6Hr1G000090	0.946325	0.0660415
	HORVU6Hr1G025270	0.76489	0.0660833
	HORVU7Hr1G011250	-1.07571	0.0661222
	HORVU5Hr1G094300	-0.529713	0.0662442
	HORVU7Hr1G089470	0.760742	0.0663809
	HORVU4Hr1G009520	0.525349	0.0663991
	HORVU1Hr1G049100	-0.761155	0.0663991
	HORVU5Hr1G079680	-1.22587	0.0664226
	HORVU2Hr1G020430	0.965662	0.0666928
	HORVU7Hr1G034120	-0.717583	0.0666928
	HORVU1Hr1G074550	-1.04872	0.0666928
	HORVU2Hr1G021060	-0.789243	0.0674533
	HORVU4Hr1G081070	-0.769158	0.0674644
	HORVU7Hr1G116750	-1.05525	0.0675881
	HORVU6Hr1G003160	-0.861275	0.067629
	HORVU6Hr1G095250	0.594483	0.067629
	HORVU2Hr1G022100	0.818791	0.0676504
	HORVU5Hr1G017220	-1.00163	0.0677316
	HORVU5Hr1G109360	-0.951247	0.0677682
	HORVU6Hr1G054890	-0.493095	0.0677682
	HORVU2Hr1G120150	-0.755368	0.0681486
	HORVU1Hr1G024400	0.616575	0.0681486
	HORVU3Hr1G086310	0.632212	0.0681675
	HORVU4Hr1G003270	0.829933	0.0681675
	HORVU6Hr1G076190	-0.563133	0.0681675
	HORVU2Hr1G008390	1.04294	0.0681945
	HORVU2Hr1G083710	0.840208	0.0681945
	HORVU7Hr1G007840	1.27772	0.0681945
	HORVU1Hr1G083710	0.818231	0.0681945
	HORVU2Hr1G118060	0.69972	0.0682529
	HORVU5Hr1G026650	0.54128	0.0682529
	HORVU1Hr1G058090	-0.742591	0.0682529
	HORVU1Hr1G080980	0.537041	0.0682529
	HORVU1Hr1G063150	0.826259	0.0684728
	HORVU1Hr1G080060	0.566102	0.0685433
	HORVU1Hr1G037650	0.729498	0.0686751
	HORVU4Hr1G004270	0.977318	0.0687036
	HORVU6Hr1G077670	-0.70275	0.0687036
	HORVU2Hr1G057670	-0.650497	0.0687946
	HORVU2Hr1G118770	0.784134	0.0687946
	HORVU5Hr1G097840	-0.758058	0.0687946
	HORVU5Hr1G120210	-1.0305	0.0687946
	HORVU4Hr1G066870	0.776817	0.0687946
	HORVU6Hr1G070380	1.07885	0.0687946
	HORVU6Hr1G073540	1.27522	0.0687946
	HORVU1Hr1G061710	-1.0065	0.0687946
	HORVU3Hr1G084110	0.917932	0.0688737
	HORVU6Hr1G056850	1.21145	0.0688737
	HORVU1Hr1G048700	0.556899	0.0688737
	HORVU0Hr1G018000	0.769538	0.0688737
	HORVU7Hr1G096430	0.695971	0.0690159
	HORVU5Hr1G095580	1.26703	0.0690823
	HORVU3Hr1G019510	0.480549	0.0693216
	HORVU7Hr1G040110	-0.757205	0.0693216
	HORVU6Hr1G065900	-0.92534	0.0693598
	HORVU2Hr1G087510	-0.985648	0.0694385
	HORVU5Hr1G013360	0.930615	0.0697372
	HORVU2Hr1G081640	-1.20751	0.0699236
	HORVU5Hr1G053580	0.728363	0.0699279
	HORVU7Hr1G117880	-0.619802	0.0699279
	HORVU1Hr1G052400	0.719201	0.0699279
	HORVU5Hr1G007480	0.610685	0.0699387
	HORVU5Hr1G006350	1.25175	0.0703063
	HORVU2Hr1G094690	0.77948	0.0703516
	HORVU3Hr1G001510	-1.05452	0.0704114
	HORVU7Hr1G096990	0.553262	0.070473
	HORVU1Hr1G090100	0.725545	0.070473
	HORVU6Hr1G059290	0.856412	0.0704741
	HORVU5Hr1G040920	-0.610537	0.0709824
	HORVU3Hr1G093750	1.22272	0.0710761
	HORVU3Hr1G077530	0.777413	0.0711894
	HORVU3Hr1G034880	0.952549	0.0711981
	HORVU7Hr1G077370	-1.1031	0.0711981
	HORVU6Hr1G062230	0.795349	0.0711981
	HORVU6Hr1G089780	-0.507485	0.0711981
	HORVU3Hr1G004320	0.729434	0.0712616
	HORVU5Hr1G112900	-0.849992	0.0715114
	HORVU6Hr1G010680	1.09677	0.0715114
	HORVU1Hr1G003810	-0.90485	0.0715114
	HORVU1Hr1G016660	0.560405	0.0718612
	HORVU4Hr1G013380	1.12373	0.0719148
	HORVU7Hr1G077110	-1.26624	0.0720201
	HORVU3Hr1G017160	-0.656597	0.072091
	HORVU5Hr1G053060	1.07727	0.072091
	HORVU5Hr1G069610	-0.995997	0.072091
	HORVU6Hr1G068770	0.709559	0.072091
	HORVU2Hr1G081880	0.72405	0.0721989
	HORVU2Hr1G081460	0.531303	0.0725546
	HORVU7Hr1G027010	-0.501585	0.0725933
	HORVU5Hr1G077350	-0.505286	0.0726147
	HORVU5Hr1G023710	1.25642	0.072751
	HORVU1Hr1G093350	0.818604	0.0728006
	HORVU2Hr1G036960	-0.442149	0.0728565
	HORVU6Hr1G017340	1.00815	0.0729248
	HORVU3Hr1G112080	-1.25143	0.0730581
	HORVU6Hr1G055250	-0.593967	0.0730581
	HORVU1Hr1G080460	0.70476	0.0731542
	HORVU3Hr1G096920	-1.0326	0.0731611
	HORVU7Hr1G082590	-0.650836	0.0731865
	HORVU2Hr1G109590	0.594469	0.0732352
	HORVU4Hr1G087800	-1.25345	0.0732352
	HORVU6Hr1G067120	-0.761235	0.0732352
	HORVU7Hr1G090830	-0.759905	0.0735093
	HORVU3Hr1G000760	-0.630176	0.0735527
	HORVU3Hr1G097070	-0.751373	0.0735527
[truncated: 15,227 more rows]

## Sheet: Leaf LaCl3 raw
	Gene-ID	Log2FC	FDR
DEGs (FDR<0.01)	HORVU4Hr1G090860	-2.91907	5.10944e-33
	HORVU3Hr1G117650	-3.50149	1.11245e-20
	HORVU2Hr1G104080	-2.44901	7.85161e-10
	HORVU5Hr1G097730	-1.10083	0.000194839
	HORVU7Hr1G091250	-1.69515	0.000401858
	HORVU2Hr1G089190	-1.67802	0.000833747
	HORVU3Hr1G117590	-1.72873	0.00122232
	HORVU7Hr1G088920	1.54485	0.00122232
	HORVU4Hr1G052430	1.34737	0.00122232
	HORVU1Hr1G071380	-1.78755	0.00122232
	HORVU2Hr1G014020	-1.22336	0.00130763
	HORVU2Hr1G089540	1.52726	0.00130763
	HORVU5Hr1G093660	-1.64519	0.00139106
	HORVU4Hr1G011740	-1.56247	0.00199698
	HORVU1Hr1G012140	-1.46633	0.00230476
	HORVU5Hr1G063570	1.68021	0.00283029
	HORVU6Hr1G000720	0.924039	0.0042063
	HORVU2Hr1G004170	1.31738	0.0049378
	HORVU6Hr1G025840	-1.44075	0.00630989
	HORVU5Hr1G119550	-1.5623	0.00763851
	HORVU0Hr1G018190	1.27236	0.0082744
UCs (FDR>0.01)	HORVU3Hr1G081270	1.50335	0.0103084
	HORVU5Hr1G093770	-1.41865	0.0103084
	HORVU4Hr1G060330	-1.39454	0.0103084
	HORVU1Hr1G072890	-1.55738	0.0103084
	HORVU1Hr1G073460	-1.45532	0.0103084
	HORVU5Hr1G011730	-1.45489	0.0106721
	HORVU5Hr1G046480	1.02857	0.0106721
	HORVU4Hr1G039300	-1.49004	0.0109936
	HORVU4Hr1G021000	-1.48311	0.0112429
	HORVU3Hr1G021150	-1.46549	0.012023
	HORVU5Hr1G065420	1.35241	0.01374
	HORVU4Hr1G012530	-1.43032	0.0170132
	HORVU1Hr1G056120	1.3041	0.0186403
	HORVU3Hr1G010140	-1.09173	0.0189846
	HORVU6Hr1G067620	1.19338	0.0192373
	HORVU1Hr1G054260	1.17041	0.0193951
	HORVU2Hr1G122660	-1.15157	0.0226482
	HORVU2Hr1G121060	-1.4	0.026755
	HORVU5Hr1G119480	-1.42332	0.026755
	HORVU7Hr1G084240	1.36628	0.026755
	HORVU4Hr1G085150	-1.43601	0.026755
	HORVU4Hr1G085590	-1.11652	0.026755
	HORVU6Hr1G055000	-1.39684	0.026755
	HORVU7Hr1G043690	1.0327	0.0271595
	HORVU3Hr1G097810	-1.38523	0.0279271
	HORVU5Hr1G080090	-1.41328	0.0284565
	HORVU5Hr1G011540	-1.42176	0.0292061
	HORVU2Hr1G116830	1.17984	0.0296496
	HORVU7Hr1G091740	-1.37719	0.0296496
	HORVU7Hr1G030210	1.09005	0.0296824
	HORVU6Hr1G001060	1.29313	0.0330624
	HORVU5Hr1G073050	-1.26131	0.0346426
	HORVU4Hr1G009070	-1.30062	0.0353993
	HORVU7Hr1G072670	-1.39356	0.0354126
	HORVU5Hr1G071940	0.986661	0.0360676
	HORVU7Hr1G116310	-1.23853	0.0360676
	HORVU3Hr1G117440	1.14996	0.0368797
	HORVU1Hr1G092440	-1.36919	0.0392357
	HORVU7Hr1G119060	0.92752	0.039931
	HORVU3Hr1G035470	-1.22073	0.0412
	HORVU5Hr1G080860	-1.18284	0.0428022
	HORVU2Hr1G093140	-1.28179	0.0432947
	HORVU2Hr1G005220	1.13328	0.0436226
	HORVU2Hr1G108790	1.34766	0.0439995
	HORVU4Hr1G009730	-1.3137	0.050054
	HORVU2Hr1G096890	1.21772	0.0523807
	HORVU4Hr1G076970	-1.0745	0.0523807
	HORVU2Hr1G096910	1.01536	0.0546172
	HORVU7Hr1G048330	-1.1959	0.0546172
	HORVU2Hr1G121050	-1.30588	0.0559125
	HORVU4Hr1G013170	-1.26076	0.0589069
	HORVU1Hr1G053440	0.834666	0.0589069
	HORVU7Hr1G034070	-1.26351	0.0638042
	HORVU3Hr1G064340	1.09509	0.0657992
	HORVU5Hr1G082990	-1.26	0.0657992
	HORVU5Hr1G086710	-1.29407	0.0657992
	HORVU7Hr1G091350	-1.30324	0.0657992
	HORVU2Hr1G013940	-0.929102	0.0671312
	HORVU0Hr1G038040	1.08558	0.0671312
	HORVU3Hr1G081180	0.882004	0.0703273
	HORVU6Hr1G029910	-1.25384	0.072894
	HORVU1Hr1G059020	-1.28582	0.0749463
	HORVU7Hr1G083670	1.01927	0.0759651
	HORVU4Hr1G064870	-1.27306	0.0769439
	HORVU6Hr1G000680	0.98279	0.0822077
	HORVU2Hr1G005330	-1.19564	0.0886477
	HORVU5Hr1G084980	1.25494	0.0886477
	HORVU7Hr1G077370	-1.23893	0.0886477
	HORVU7Hr1G082590	-0.929267	0.0886477
	HORVU4Hr1G059390	1.00743	0.0886477
	HORVU1Hr1G048860	-0.958919	0.0886477
	HORVU2Hr1G112830	1.11708	0.0954868
	HORVU5Hr1G040970	-0.808745	0.0978349
	HORVU3Hr1G004790	-1.09653	0.0983323
	HORVU4Hr1G056240	1.22473	0.101759
	HORVU7Hr1G010690	0.767124	0.108509
	HORVU7Hr1G089540	1.01884	0.108509
	HORVU2Hr1G023450	-1.16745	0.109817
	HORVU7Hr1G058860	1.02087	0.109817
	HORVU7Hr1G076440	-1.22129	0.109817
	HORVU7Hr1G085450	-1.09077	0.109817
	HORVU2Hr1G115920	1.0269	0.109819
	HORVU4Hr1G053250	1.13616	0.114542
	HORVU2Hr1G079420	1.19813	0.122202
	HORVU2Hr1G118050	1.09357	0.12451
	HORVU0Hr1G034660	-0.908854	0.126428
	HORVU4Hr1G090720	-1.0361	0.129055
	HORVU5Hr1G064040	-1.20713	0.129093
	HORVU2Hr1G090410	-0.800348	0.132533
	HORVU7Hr1G008390	0.86854	0.132533
	HORVU4Hr1G018230	-1.14602	0.132533
	HORVU1Hr1G052010	0.909722	0.132533
	HORVU7Hr1G032740	-1.09331	0.136573
	HORVU4Hr1G063980	-1.05996	0.144756
	HORVU5Hr1G005290	-1.04605	0.148455
	HORVU3Hr1G052490	0.697976	0.148721
	HORVU3Hr1G095700	-1.10017	0.148721
	HORVU6Hr1G073520	-0.823426	0.148721
	HORVU1Hr1G017700	-0.884597	0.148721
	HORVU1Hr1G057680	-1.14992	0.148721
	HORVU0Hr1G012860	-1.17528	0.148721
	HORVU3Hr1G019850	-1.12289	0.151911
	HORVU6Hr1G060610	-1.10601	0.151911
	HORVU4Hr1G054420	0.936114	0.154584
	HORVU4Hr1G068530	0.911289	0.154584
	HORVU5Hr1G062510	-1.1497	0.156865
	HORVU7Hr1G051150	-0.947636	0.162769
	HORVU6Hr1G075010	0.811743	0.163906
	HORVU6Hr1G014600	1.16219	0.164962
	HORVU2Hr1G013760	1.00684	0.167487
	HORVU3Hr1G019360	-1.02729	0.167487
	HORVU3Hr1G021810	0.999875	0.167487
	HORVU3Hr1G022260	-0.739846	0.167487
	HORVU5Hr1G032980	0.788183	0.167487
	HORVU5Hr1G124380	-0.966326	0.167487
	HORVU7Hr1G088510	-1.12957	0.167487
	HORVU7Hr1G090280	-1.1545	0.167487
	HORVU4Hr1G011120	0.881504	0.167487
	HORVU4Hr1G080610	0.976212	0.167487
	HORVU6Hr1G000940	0.863712	0.167487
	HORVU6Hr1G004000	1.10025	0.167487
	HORVU1Hr1G000350	1.10668	0.167487
	HORVU1Hr1G071430	-1.10721	0.167487
	HORVU2Hr1G049420	-1.13604	0.169842
	HORVU5Hr1G039900	-1.08801	0.169842
	HORVU5Hr1G073800	-1.13436	0.169842
	ENSRNA049480416	1.03727	0.169842
	HORVU5Hr1G118870	-0.974916	0.169842
	HORVU3Hr1G061850	-1.06091	0.17202
	HORVU4Hr1G076040	0.90449	0.17202
	EPlHVUG00000039924	1.06579	0.173016
	HORVU2Hr1G065100	-1.04164	0.176345
	HORVU2Hr1G093950	-1.06603	0.178933
	HORVU6Hr1G094410	1.00415	0.182592
	HORVU3Hr1G067130	-1.11404	0.185745
	HORVU2Hr1G110120	0.878042	0.186787
	HORVU6Hr1G072540	0.851744	0.186787
	HORVU6Hr1G081160	-1.06486	0.186787
	HORVU6Hr1G068910	0.928136	0.191951
	HORVU2Hr1G094630	-1.11766	0.201972
	HORVU7Hr1G025240	-1.11871	0.201972
	HORVU2Hr1G060730	-1.0414	0.205286
	HORVU2Hr1G065120	0.848084	0.205286
	HORVU3Hr1G011560	0.943072	0.205286
	HORVU5Hr1G063590	1.10705	0.205286
	HORVU4Hr1G057000	-0.898139	0.205286
	HORVU6Hr1G015480	0.983271	0.205286
	HORVU1Hr1G037550	-0.668312	0.205286
	HORVU7Hr1G122470	-0.996691	0.206934
	HORVU6Hr1G081750	0.893016	0.209558
	HORVU6Hr1G020720	-0.814329	0.209623
	HORVU5Hr1G124120	-1.05896	0.21121
	HORVU5Hr1G063600	1.01959	0.212321
	HORVU4Hr1G070610	-1.10164	0.219219
	HORVU6Hr1G020380	-0.729077	0.219606
	HORVU3Hr1G009490	-0.912	0.225034
	HORVU3Hr1G085460	0.99489	0.225034
	HORVU6Hr1G075270	0.795763	0.225188
	HORVU3Hr1G090760	0.864967	0.225963
	HORVU5Hr1G063670	1.08652	0.225963
	HORVU5Hr1G109290	-1.05183	0.225963
	HORVU1Hr1G017870	-0.935796	0.225963
	HORVU4Hr1G083080	0.768487	0.226561
	HORVU6Hr1G081400	-1.0571	0.226561
	HORVU7Hr1G082510	-0.934275	0.226936
	HORVU0Hr1G002870	1.03048	0.226936
	HORVU3Hr1G108690	0.99412	0.228836
	HORVU5Hr1G067200	-1.07102	0.228836
	HORVU5Hr1G014790	0.745429	0.231498
	HORVU5Hr1G062450	0.977459	0.231568
	HORVU4Hr1G059150	-1.08606	0.231568
	HORVU1Hr1G063780	-1.08593	0.231568
	HORVU7Hr1G088030	0.819995	0.231853
	HORVU6Hr1G000960	0.872229	0.240551
	HORVU3Hr1G068840	0.97216	0.241282
	HORVU4Hr1G002570	1.05125	0.241282
	HORVU6Hr1G015690	-1.02017	0.241282
	HORVU1Hr1G070690	-0.874863	0.241282
	HORVU7Hr1G011250	-1.0709	0.244471
	HORVU6Hr1G067920	1.00471	0.248315
	HORVU3Hr1G114250	-0.737486	0.249086
	HORVU2Hr1G123730	-1.01416	0.253293
	HORVU2Hr1G010800	0.990533	0.269056
	HORVU2Hr1G002440	0.646838	0.27348
	HORVU5Hr1G081460	0.961701	0.27348
	HORVU0Hr1G034250	-1.04604	0.275915
	HORVU5Hr1G106640	-1.04049	0.283471
	HORVU3Hr1G096910	-0.952037	0.285758
	HORVU4Hr1G085250	-0.989348	0.28834
	HORVU1Hr1G082190	-1.04143	0.28834
	HORVU2Hr1G039000	0.723933	0.290354
	HORVU3Hr1G073630	0.723878	0.311471
	HORVU7Hr1G075700	0.873378	0.31152
	HORVU5Hr1G099200	-0.726967	0.312259
	HORVU3Hr1G030040	-0.929989	0.315732
	HORVU4Hr1G003580	-0.927076	0.317443
	HORVU3Hr1G108540	0.791925	0.321053
	HORVU5Hr1G103420	0.98207	0.321053
	HORVU7Hr1G038420	1.03478	0.321053
	HORVU2Hr1G126100	-0.87647	0.327268
	HORVU4Hr1G087800	-0.995159	0.331865
	HORVU3Hr1G114970	-0.956777	0.333255
	HORVU5Hr1G007770	0.570551	0.334374
	HORVU2Hr1G121820	-0.962676	0.336856
	HORVU7Hr1G012530	0.572579	0.336856
	HORVU7Hr1G082990	-1.02358	0.336856
	HORVU4Hr1G017030	0.839612	0.336856
	HORVU4Hr1G087980	0.98878	0.337612
	HORVU0Hr1G002930	0.936089	0.337612
	HORVU2Hr1G073210	-1.00399	0.339661
	HORVU3Hr1G077230	0.859772	0.339661
	HORVU5Hr1G086830	1.0199	0.339661
	HORVU7Hr1G073370	-0.928494	0.339661
	HORVU6Hr1G093310	-0.995994	0.339661
	HORVU1Hr1G071180	-1.0202	0.339661
	HORVU1Hr1G024140	-0.895274	0.341187
	HORVU2Hr1G060880	-0.740388	0.341588
	HORVU7Hr1G073570	-0.972831	0.341588
	HORVU7Hr1G115810	-0.950961	0.341588
	HORVU4Hr1G055220	-0.971842	0.341588
	HORVU4Hr1G028910	-0.939775	0.341771
	HORVU7Hr1G086010	0.697573	0.342007
	HORVU3Hr1G028440	-0.944446	0.344141
	HORVU3Hr1G071400	0.990571	0.344717
	HORVU3Hr1G117570	-1.00242	0.344717
	HORVU4Hr1G022830	-0.928299	0.344717
	HORVU4Hr1G072960	-0.966101	0.346489
	HORVU2Hr1G085650	-0.86716	0.34678
	HORVU3Hr1G098290	0.657585	0.34678
	HORVU7Hr1G082350	0.821642	0.34678
	HORVU1Hr1G070290	0.807325	0.34852
	HORVU5Hr1G028460	0.728969	0.350898
	HORVU3Hr1G008420	-0.718019	0.357308
	HORVU2Hr1G025670	1.00313	0.357927
	HORVU2Hr1G072500	-0.928785	0.357927
	HORVU4Hr1G086500	-0.936687	0.358632
	HORVU4Hr1G016010	-1.00245	0.359682
	HORVU4Hr1G023260	0.898695	0.360856
	HORVU2Hr1G032970	-0.58508	0.361799
	HORVU3Hr1G095400	-0.80548	0.361799
	HORVU1Hr1G090170	0.995499	0.362773
	HORVU2Hr1G008980	-0.95153	0.366825
	HORVU5Hr1G114470	-0.808663	0.366825
	HORVU7Hr1G048690	-0.925647	0.366825
	HORVU7Hr1G095920	0.931058	0.366825
	HORVU4Hr1G066870	0.865585	0.366825
	HORVU6Hr1G034350	0.949708	0.366825
	HORVU6Hr1G089350	-0.91671	0.366825
	HORVU1Hr1G038120	-0.665983	0.366825
	HORVU7Hr1G054710	-0.85459	0.368299
	HORVU3Hr1G028540	-0.759449	0.375124
	HORVU6Hr1G042550	-0.873685	0.375124
	HORVU1Hr1G089490	-0.990195	0.376563
	HORVU1Hr1G044680	0.602451	0.380169
	HORVU7Hr1G082020	0.95876	0.38139
	HORVU2Hr1G046370	-0.868944	0.381638
	HORVU5Hr1G064650	0.873268	0.381776
	HORVU3Hr1G094600	0.650578	0.385087
	HORVU7Hr1G038510	0.885124	0.385087
	HORVU5Hr1G063620	0.919144	0.390241
	HORVU5Hr1G094710	0.974212	0.390241
	HORVU1Hr1G079280	0.966661	0.390241
	HORVU3Hr1G056270	0.807621	0.391899
	HORVU7Hr1G083440	0.928352	0.397197
	HORVU5Hr1G112670	0.677344	0.397289
	HORVU2Hr1G030670	-0.765932	0.398711
	HORVU5Hr1G063820	0.558299	0.398711
	HORVU3Hr1G073670	0.667922	0.403214
	HORVU5Hr1G086390	0.932616	0.405351
	HORVU1Hr1G027980	0.786608	0.405351
	HORVU3Hr1G007570	-0.773229	0.405351
	HORVU3Hr1G116060	-0.702807	0.405351
	HORVU7Hr1G057100	-0.869186	0.405351
	HORVU7Hr1G117640	-0.821636	0.405351
	HORVU4Hr1G026030	-0.932151	0.405351
	HORVU4Hr1G027660	-0.532235	0.405351
	HORVU6Hr1G034620	0.802823	0.405351
	HORVU6Hr1G078700	-0.861597	0.405351
	HORVU6Hr1G083050	-0.911263	0.405351
	HORVU4Hr1G014900	-0.832277	0.409714
	HORVU2Hr1G028330	0.797012	0.410651
	HORVU7Hr1G098830	-0.954704	0.410651
	HORVU6Hr1G050490	-0.849414	0.412301
	HORVU1Hr1G070190	-0.961016	0.412301
	HORVU2Hr1G012440	-0.784375	0.412806
	HORVU7Hr1G036460	-0.866752	0.412806
	HORVU5Hr1G009460	0.73377	0.413368
	HORVU3Hr1G051910	-0.824196	0.41427
	HORVU1Hr1G060610	0.672419	0.414926
	HORVU2Hr1G087860	-0.83784	0.414938
	HORVU4Hr1G083470	0.656115	0.417561
	HORVU3Hr1G016240	0.720341	0.419063
	HORVU7Hr1G045830	0.657696	0.419063
	HORVU1Hr1G000600	-0.790344	0.419063
	HORVU0Hr1G017570	-0.94254	0.419063
	HORVU7Hr1G085120	0.762722	0.426139
	HORVU3Hr1G058740	0.846518	0.427736
	HORVU3Hr1G086190	0.855632	0.427736
	HORVU3Hr1G115990	-0.806105	0.427736
	HORVU5Hr1G095580	0.937244	0.427736
	HORVU1Hr1G047930	0.822964	0.427736
	HORVU2Hr1G004930	-0.715435	0.428263
	HORVU2Hr1G116060	0.687722	0.428263
	HORVU2Hr1G116450	-0.879326	0.428263
	HORVU7Hr1G085570	0.659276	0.428263
	HORVU6Hr1G067740	0.949938	0.428263
	HORVU6Hr1G075420	0.862665	0.428263
	HORVU2Hr1G079040	-0.901835	0.429599
	HORVU1Hr1G089500	-0.924603	0.430427
	HORVU2Hr1G124870	-0.783412	0.435355
	HORVU7Hr1G086350	0.87072	0.436193
	HORVU3Hr1G066850	-0.804649	0.436536
	HORVU3Hr1G094210	-0.830604	0.436536
	HORVU5Hr1G077920	-0.78696	0.436536
	HORVU4Hr1G008610	-0.838828	0.436536
	HORVU6Hr1G061270	0.581946	0.436536
	HORVU1Hr1G088840	0.653756	0.436536
	HORVU5Hr1G004370	-0.9253	0.440437
	HORVU5Hr1G011760	0.809048	0.440437
	HORVU6Hr1G090070	0.828326	0.440889
	HORVU2Hr1G119700	-0.765822	0.441237
	HORVU3Hr1G056640	0.936837	0.441237
	HORVU5Hr1G069730	0.901293	0.441237
	HORVU7Hr1G059900	0.861546	0.441237
	HORVU4Hr1G076420	-0.938107	0.441237
	AGP50735	-0.904347	0.446176
	HORVU2Hr1G012980	0.891412	0.446637
	HORVU3Hr1G078850	-0.906156	0.446637
	HORVU4Hr1G006850	-0.827097	0.446637
	HORVU4Hr1G060870	-0.921533	0.446637
	HORVU1Hr1G092670	-0.763397	0.446637
	HORVU0Hr1G011720	0.900551	0.446637
	HORVU3Hr1G063310	0.909674	0.447975
	HORVU5Hr1G011780	-0.839109	0.447975
	HORVU5Hr1G038630	-0.768299	0.447975
	HORVU5Hr1G112060	0.833674	0.447975
	HORVU6Hr1G044840	0.830887	0.447975
	HORVU6Hr1G053590	0.924979	0.447975
	HORVU1Hr1G063420	0.79746	0.447975
	HORVU5Hr1G019110	-0.78175	0.450442
	HORVU2Hr1G023180	0.882092	0.451321
	HORVU2Hr1G023560	0.598132	0.451321
	HORVU2Hr1G061850	0.873871	0.451321
	HORVU2Hr1G092180	0.541941	0.451321
	HORVU3Hr1G005500	-0.771784	0.451321
	HORVU3Hr1G059720	-0.922732	0.451321
	HORVU7Hr1G035030	-0.704758	0.451321
	HORVU7Hr1G085130	0.91123	0.451321
	HORVU4Hr1G017450	-0.748431	0.451321
	HORVU6Hr1G000830	0.880121	0.451321
	HORVU1Hr1G018450	0.877629	0.451321
	HORVU0Hr1G040430	0.675824	0.451321
	HORVU2Hr1G011200	0.609877	0.455293
	HORVU2Hr1G028670	0.921483	0.455293
	HORVU2Hr1G109330	0.782112	0.455293
	HORVU7Hr1G044670	-0.913229	0.455293
	HORVU1Hr1G054020	-0.856201	0.456664
	HORVU3Hr1G113020	0.920838	0.45807
	HORVU3Hr1G085930	-0.664726	0.462353
	HORVU3Hr1G082730	0.842556	0.463742
	HORVU5Hr1G049160	-0.803685	0.466059
	HORVU3Hr1G001140	0.756284	0.467296
	HORVU3Hr1G057090	-0.7866	0.468974
	HORVU5Hr1G070360	-0.904749	0.468974
	HORVU4Hr1G085800	-0.920963	0.468974
	HORVU6Hr1G062380	0.817489	0.468974
	HORVU1Hr1G038880	-0.91553	0.468974
	HORVU5Hr1G052230	-0.698379	0.471781
	HORVU5Hr1G102620	0.582606	0.471841
	HORVU3Hr1G068410	-0.918411	0.472301
	HORVU1Hr1G013970	0.661051	0.473033
	HORVU2Hr1G084400	-0.91465	0.475761
	HORVU4Hr1G050230	-0.67418	0.475761
	HORVU1Hr1G023220	-0.633873	0.475761
	HORVU6Hr1G047870	-0.824701	0.478443
	HORVU1Hr1G024510	-0.833641	0.478443
	HORVU1Hr1G037650	0.707302	0.478443
	HORVU3Hr1G108670	0.888089	0.480275
	HORVU5Hr1G082890	0.677153	0.481145
	HORVU4Hr1G085320	-0.912321	0.481805
	HORVU3Hr1G092020	-0.850087	0.486906
	HORVU5Hr1G010960	-0.907842	0.486906
	HORVU5Hr1G068230	-0.849753	0.486906
	HORVU5Hr1G063390	0.578244	0.489813
	HORVU7Hr1G029260	0.745528	0.489813
	HORVU7Hr1G111310	-0.89181	0.489813
	HORVU4Hr1G066510	-0.689179	0.489813
	HORVU1Hr1G012440	0.715353	0.489813
	HORVU1Hr1G063470	-0.900075	0.489813
	HORVU2Hr1G007130	-0.904627	0.491695
	HORVU0Hr1G034980	0.898449	0.492336
	HORVU2Hr1G022100	0.718525	0.493421
	HORVU2Hr1G042490	-0.614992	0.493421
	HORVU2Hr1G105190	-0.811737	0.493421
	HORVU3Hr1G116350	-0.901865	0.493421
	HORVU7Hr1G055900	-0.841884	0.493421
	HORVU0Hr1G004850	0.569031	0.493421
	HORVU3Hr1G019340	0.760681	0.495064
	HORVU7Hr1G006490	0.592573	0.495064
	HORVU7Hr1G098370	-0.577571	0.495064
	HORVU4Hr1G008580	-0.572956	0.495064
	HORVU4Hr1G080820	-0.783936	0.495064
	HORVU6Hr1G040040	-0.559978	0.495064
	HORVU1Hr1G038620	0.632012	0.495064
	HORVU1Hr1G083710	0.758269	0.495064
	HORVU2Hr1G037470	0.667122	0.496411
	HORVU2Hr1G040780	-0.730776	0.496411
	HORVU2Hr1G122070	-0.716315	0.496411
	HORVU3Hr1G084420	0.82974	0.496411
	HORVU3Hr1G087940	0.612102	0.496411
	HORVU5Hr1G061770	-0.704296	0.496411
	HORVU5Hr1G109910	0.752521	0.496411
	HORVU7Hr1G097010	0.679935	0.496411
	HORVU0Hr1G022370	-0.874434	0.496411
	HORVU2Hr1G092420	-0.620249	0.499101
	HORVU7Hr1G040790	0.658763	0.499101
	HORVU1Hr1G094180	-0.856464	0.499101
	HORVU1Hr1G047710	-0.774098	0.501195
	HORVU7Hr1G030660	0.761618	0.501228
	HORVU6Hr1G007360	0.834544	0.501922
	HORVU3Hr1G088970	0.671175	0.502001
	HORVU5Hr1G103680	0.817707	0.502001
	HORVU2Hr1G103490	0.866175	0.50338
	HORVU6Hr1G075850	-0.843706	0.50338
	HORVU0Hr1G022690	-0.721907	0.50338
	HORVU2Hr1G011070	-0.891743	0.504579
	HORVU2Hr1G092070	-0.865128	0.504579
	HORVU2Hr1G096760	-0.715902	0.504579
	HORVU2Hr1G126040	0.858333	0.504579
	HORVU3Hr1G048820	-0.820442	0.504579
	HORVU3Hr1G064570	0.855156	0.504579
	HORVU3Hr1G078110	-0.729271	0.504579
	HORVU5Hr1G015390	0.832684	0.504579
	HORVU5Hr1G047730	-0.628724	0.504579
	HORVU5Hr1G095990	0.678889	0.504579
	HORVU5Hr1G097200	-0.865509	0.504579
	HORVU7Hr1G118510	0.868277	0.504579
	HORVU4Hr1G066230	-0.688299	0.504579
	HORVU6Hr1G055250	-0.683459	0.504579
	HORVU1Hr1G041240	-0.879285	0.504579
	HORVU1Hr1G043940	0.61538	0.504579
	HORVU1Hr1G059510	0.63436	0.504579
	HORVU1Hr1G067300	-0.749187	0.504579
	HORVU1Hr1G071460	-0.883846	0.504579
	HORVU1Hr1G081410	0.793011	0.504579
	HORVU1Hr1G085480	-0.865389	0.504579
	HORVU1Hr1G007480	-0.725694	0.510451
	HORVU6Hr1G058630	0.797248	0.514177
	HORVU3Hr1G105630	0.882512	0.517251
	HORVU1Hr1G090860	0.670236	0.517251
	HORVU4Hr1G065920	0.509632	0.517752
	HORVU3Hr1G096920	-0.850823	0.518713
	HORVU5Hr1G064020	-0.682772	0.518713
	HORVU7Hr1G107330	0.873204	0.518713
	HORVU1Hr1G038750	-0.844202	0.519683
	HORVU6Hr1G024800	-0.877378	0.519997
	HORVU1Hr1G053310	0.788347	0.519997
	HORVU7Hr1G055930	0.797528	0.520995
	HORVU7Hr1G078320	0.630685	0.520995
	HORVU2Hr1G109710	-0.687052	0.522517
	HORVU7Hr1G035850	0.754671	0.522517
	HORVU0Hr1G008640	-0.826893	0.523414
	HORVU3Hr1G110580	0.766005	0.524448
	HORVU1Hr1G017460	-0.687403	0.524448
	HORVU3Hr1G009210	-0.688303	0.52518
	HORVU5Hr1G109360	-0.867752	0.52518
	HORVU4Hr1G058150	0.488219	0.52518
	HORVU1Hr1G047390	-0.724875	0.52518
	HORVU2Hr1G038740	0.540692	0.525373
	HORVU2Hr1G005150	-0.799882	0.525447
	HORVU2Hr1G042370	0.647806	0.525447
	HORVU3Hr1G001040	-0.702333	0.525447
	HORVU3Hr1G030150	-0.758638	0.525447
	HORVU5Hr1G005740	0.599185	0.525447
	HORVU5Hr1G083210	-0.562085	0.525447
	HORVU1Hr1G013820	0.852186	0.525447
	HORVU1Hr1G022020	0.769377	0.525447
	HORVU4Hr1G088910	-0.759281	0.525681
	HORVU7Hr1G096250	0.653832	0.527751
	HORVU5Hr1G058630	-0.853062	0.530553
	HORVU4Hr1G068930	0.70609	0.531221
	HORVU3Hr1G022020	0.640481	0.532177
	HORVU5Hr1G112630	-0.865152	0.532177
	HORVU7Hr1G049240	0.503447	0.532177
	HORVU6Hr1G084080	0.717935	0.532177
	HORVU6Hr1G080760	0.622903	0.533476
	HORVU2Hr1G028540	-0.778702	0.534523
	HORVU2Hr1G032710	-0.845817	0.534523
	HORVU2Hr1G042350	-0.838883	0.534523
	HORVU3Hr1G096860	-0.867577	0.534523
	HORVU5Hr1G069480	0.589481	0.534523
	HORVU5Hr1G094700	0.625448	0.534523
	HORVU7Hr1G088140	0.656561	0.534523
	HORVU6Hr1G018330	0.666615	0.534523
	HORVU6Hr1G058100	-0.642033	0.534523
	HORVU1Hr1G083960	0.722506	0.535651
	HORVU6Hr1G094070	0.854693	0.537261
	HORVU5Hr1G088350	0.831322	0.540264
	HORVU5Hr1G053700	0.839634	0.544943
	HORVU7Hr1G080190	0.86233	0.545498
	HORVU7Hr1G115540	-0.838621	0.545498
	HORVU4Hr1G069480	-0.750059	0.545498
	HORVU7Hr1G051730	0.794157	0.545911
	HORVU4Hr1G050020	-0.810525	0.546693
	HORVU5Hr1G075540	0.845731	0.548114
	HORVU5Hr1G107260	0.670936	0.548114
	HORVU2Hr1G093720	0.677011	0.55101
	HORVU1Hr1G014200	0.690206	0.551326
	HORVU3Hr1G013690	0.487136	0.551913
	HORVU3Hr1G100270	-0.85631	0.551913
	HORVU2Hr1G118740	-0.745911	0.552767
	HORVU5Hr1G125710	-0.753363	0.552767
	HORVU6Hr1G060250	-0.784846	0.552767
	HORVU6Hr1G082710	-0.823012	0.552767
	HORVU1Hr1G052290	0.657666	0.552767
	HORVU1Hr1G071500	0.848678	0.552767
	HORVU1Hr1G071960	0.752114	0.552767
	HORVU5Hr1G014170	-0.717795	0.553154
	HORVU6Hr1G091720	-0.790672	0.555564
	HORVU5Hr1G037320	0.749438	0.555661
	HORVU5Hr1G048550	-0.854593	0.555661
	HORVU3Hr1G027770	-0.85294	0.555701
	HORVU3Hr1G078660	0.667439	0.555701
	HORVU5Hr1G072860	-0.852893	0.555701
	HORVU4Hr1G015710	0.73348	0.556026
	HORVU7Hr1G052870	-0.760279	0.556093
	HORVU6Hr1G071790	-0.566076	0.556093
	HORVU6Hr1G084650	0.493835	0.556093
	HORVU0Hr1G037590	-0.818217	0.556093
	HORVU1Hr1G094880	0.837954	0.556624
	HORVU6Hr1G017710	-0.680261	0.559081
	HORVU4Hr1G018640	0.668126	0.563256
	HORVU2Hr1G053480	0.579941	0.563336
	HORVU7Hr1G091440	0.760298	0.56387
	HORVU3Hr1G107090	0.692076	0.56758
	HORVU2Hr1G060040	0.733045	0.56774
	HORVU3Hr1G086380	0.809158	0.56774
	HORVU2Hr1G073370	-0.768792	0.568477
	HORVU2Hr1G120090	0.793543	0.568477
	HORVU3Hr1G093370	0.727952	0.568477
	HORVU5Hr1G122760	-0.69342	0.568477
	HORVU4Hr1G089200	-0.831706	0.568477
	HORVU6Hr1G028590	-0.836432	0.568477
	HORVU5Hr1G063660	0.744858	0.570355
	HORVU7Hr1G107720	-0.666656	0.570355
	HORVU4Hr1G053530	0.697743	0.570355
	HORVU4Hr1G059250	-0.543869	0.570355
	HORVU0Hr1G007470	0.823508	0.570355
	HORVU2Hr1G025920	0.843418	0.572574
	HORVU2Hr1G028510	0.794061	0.572574
	HORVU2Hr1G102730	-0.724085	0.572574
	HORVU5Hr1G100140	-0.643018	0.572574
	HORVU7Hr1G114680	-0.664837	0.572574
	HORVU4Hr1G084120	0.837981	0.572574
	HORVU3Hr1G030890	-0.702529	0.57369
	HORVU5Hr1G092100	-0.79213	0.57369
	HORVU7Hr1G040850	0.832324	0.573841
	HORVU2Hr1G010830	0.593351	0.57698
	HORVU2Hr1G062060	-0.770186	0.577384
	HORVU4Hr1G082470	-0.834388	0.577384
	HORVU5Hr1G093580	-0.707426	0.58332
	HORVU4Hr1G006200	-0.668826	0.58332
	HORVU2Hr1G071570	0.79573	0.58496
	HORVU2Hr1G010890	0.657578	0.585591
	HORVU2Hr1G121700	-0.758313	0.586325
	HORVU1Hr1G087320	-0.588758	0.586325
	HORVU2Hr1G102710	0.747236	0.586614
	HORVU3Hr1G020210	0.835987	0.586614
	HORVU5Hr1G015050	0.578939	0.586614
	HORVU7Hr1G098100	0.609636	0.586614
	HORVU4Hr1G037800	0.610467	0.586614
	HORVU6Hr1G008200	0.634244	0.586614
	HORVU0Hr1G034970	0.826252	0.589951
	HORVU1Hr1G068910	0.73623	0.592141
	HORVU2Hr1G031050	-0.711468	0.593124
	HORVU2Hr1G033610	-0.819282	0.593124
	HORVU2Hr1G045140	0.649368	0.593124
	HORVU2Hr1G060710	0.53164	0.593124
	HORVU2Hr1G083490	0.613861	0.593124
	HORVU2Hr1G094090	-0.735414	0.593124
	HORVU2Hr1G113460	-0.704456	0.593124
	HORVU2Hr1G114220	-0.78078	0.593124
	HORVU2Hr1G119090	0.594918	0.593124
	HORVU3Hr1G033190	0.734603	0.593124
	HORVU3Hr1G088850	-0.789153	0.593124
	HORVU3Hr1G089290	0.73229	0.593124
	HORVU5Hr1G063810	-0.812322	0.593124
	HORVU5Hr1G098390	-0.54424	0.593124
	HORVU7Hr1G032750	-0.521792	0.593124
	HORVU7Hr1G035670	-0.691807	0.593124
	HORVU7Hr1G055570	-0.759003	0.593124
	HORVU7Hr1G060530	0.784512	0.593124
	HORVU7Hr1G091230	-0.647298	0.593124
	HORVU7Hr1G096660	-0.628363	0.593124
	HORVU7Hr1G120060	-0.617389	0.593124
	HORVU4Hr1G056060	0.490694	0.593124
	HORVU6Hr1G064450	-0.817356	0.593124
	HORVU6Hr1G080320	0.816605	0.593124
	HORVU6Hr1G090190	0.494005	0.593124
	HORVU1Hr1G047010	0.589374	0.593124
	HORVU1Hr1G079370	0.641909	0.593124
	HORVU1Hr1G089510	-0.726902	0.593124
	HORVU0Hr1G022670	-0.748681	0.593124
	HORVU0Hr1G023150	0.675827	0.593124
	HORVU0Hr1G038670	0.706055	0.593124
	HORVU0Hr1G038990	-0.627153	0.593124
	HORVU1Hr1G021720	0.628314	0.593323
	HORVU5Hr1G081060	-0.817392	0.594917
	HORVU2Hr1G050640	-0.598744	0.59531
	HORVU3Hr1G076480	0.786465	0.59531
	HORVU6Hr1G073510	0.71379	0.59531
	HORVU0Hr1G004700	0.57192	0.597849
	HORVU3Hr1G030970	-0.680748	0.600597
	HORVU5Hr1G070720	0.482641	0.603765
	HORVU7Hr1G091650	0.520782	0.603873
	HORVU5Hr1G022520	-0.813089	0.60846
	HORVU3Hr1G011870	-0.80388	0.610852
	HORVU7Hr1G117880	0.590192	0.610852
	HORVU7Hr1G118760	0.644258	0.610852
	HORVU4Hr1G051120	0.785228	0.610852
	HORVU6Hr1G053730	0.471397	0.610852
	HORVU3Hr1G034100	0.60549	0.614111
	ENSRNA049487347	-0.775268	0.614111
	HORVU7Hr1G007920	-0.748117	0.614111
	HORVU6Hr1G023070	0.667969	0.614111
	HORVU1Hr1G021600	-0.767788	0.614111
	HORVU5Hr1G058270	-0.547582	0.619369
	HORVU6Hr1G088850	0.563172	0.619369
	HORVU2Hr1G060210	-0.585785	0.620164
	HORVU3Hr1G068500	0.706367	0.620164
	HORVU7Hr1G106150	0.602019	0.620164
	HORVU4Hr1G035290	0.606303	0.620164
	HORVU4Hr1G043650	0.579623	0.620164
	HORVU4Hr1G073840	-0.757188	0.620164
	HORVU6Hr1G035640	-0.803964	0.620164
	HORVU2Hr1G116660	0.539627	0.620743
	HORVU5Hr1G027110	0.805941	0.622354
	HORVU4Hr1G056820	0.620114	0.622354
	HORVU6Hr1G037000	-0.737979	0.622354
	HORVU5Hr1G004510	-0.804483	0.622619
	HORVU2Hr1G082330	0.807747	0.623062
	HORVU3Hr1G020100	-0.652185	0.623062
	HORVU3Hr1G050080	0.631492	0.623062
	HORVU5Hr1G011960	0.580847	0.623062
	HORVU5Hr1G106960	-0.809063	0.623062
	HORVU7Hr1G107630	0.811289	0.623062
	HORVU7Hr1G114890	0.743059	0.623062
	HORVU7Hr1G115670	0.75916	0.623062
	HORVU4Hr1G063150	0.485834	0.623062
	HORVU6Hr1G074650	-0.795371	0.623062
	HORVU1Hr1G077230	0.718626	0.623062
	HORVU1Hr1G089550	-0.715979	0.623062
	HORVU7Hr1G046970	-0.612898	0.623482
	HORVU7Hr1G027440	-0.738252	0.624016
	HORVU4Hr1G060000	-0.659887	0.624394
	HORVU1Hr1G021120	0.579983	0.625024
	HORVU1Hr1G074860	0.595051	0.625024
	HORVU7Hr1G099390	-0.799895	0.626805
	HORVU3Hr1G081880	-0.556327	0.627639
	HORVU2Hr1G092230	-0.558574	0.628404
	HORVU2Hr1G098160	0.760046	0.628404
	HORVU3Hr1G018820	-0.511229	0.628404
	HORVU7Hr1G097460	-0.544401	0.628404
	HORVU4Hr1G032590	0.746512	0.628404
	HORVU3Hr1G080500	-0.789624	0.631885
	HORVU2Hr1G045970	-0.714656	0.632644
	HORVU2Hr1G048100	-0.789897	0.632644
	HORVU2Hr1G078350	0.719698	0.632644
	HORVU2Hr1G093210	-0.709788	0.632644
	HORVU2Hr1G117400	0.803313	0.632644
	HORVU2Hr1G121440	-0.568389	0.632644
	HORVU3Hr1G037630	-0.538111	0.632644
	HORVU3Hr1G050800	0.495556	0.632644
	HORVU3Hr1G057200	0.708018	0.632644
	HORVU3Hr1G074310	-0.640921	0.632644
	HORVU3Hr1G083500	0.736406	0.632644
	HORVU3Hr1G097070	-0.730252	0.632644
	HORVU3Hr1G111580	-0.781376	0.632644
	HORVU3Hr1G117840	-0.67456	0.632644
	HORVU5Hr1G007260	0.732245	0.632644
	HORVU5Hr1G062370	-0.777782	0.632644
	HORVU5Hr1G092170	-0.727246	0.632644
	HORVU7Hr1G082710	0.565493	0.632644
	HORVU4Hr1G056550	0.530791	0.632644
	HORVU4Hr1G082090	-0.773311	0.632644
	HORVU6Hr1G034130	-0.728357	0.632644
	HORVU6Hr1G056110	0.780713	0.632644
	HORVU6Hr1G084030	0.720677	0.632644
	HORVU1Hr1G042490	0.553586	0.632644
	HORVU1Hr1G065150	-0.587466	0.632644
	HORVU0Hr1G013770	-0.539773	0.632644
	HORVU0Hr1G034320	-0.644985	0.632644
	HORVU2Hr1G027470	-0.549982	0.633588
	HORVU2Hr1G028340	-0.56528	0.633588
	HORVU2Hr1G034270	-0.752715	0.633588
	HORVU2Hr1G062700	-0.771669	0.633588
	HORVU2Hr1G112620	-0.775464	0.633588
	HORVU2Hr1G114260	-0.639449	0.633588
	HORVU2Hr1G123650	-0.643588	0.633588
	HORVU2Hr1G124530	-0.644829	0.633588
	HORVU3Hr1G033430	-0.736074	0.633588
	HORVU3Hr1G056090	0.774524	0.633588
	HORVU3Hr1G066940	-0.790932	0.633588
	HORVU3Hr1G077730	-0.601068	0.633588
	HORVU3Hr1G082740	0.607819	0.633588
	HORVU3Hr1G083470	-0.429693	0.633588
	HORVU3Hr1G085520	-0.53357	0.633588
	HORVU3Hr1G090350	-0.623081	0.633588
	HORVU3Hr1G109740	0.63965	0.633588
	HORVU5Hr1G002090	-0.758685	0.633588
	HORVU5Hr1G046900	-0.701728	0.633588
	HORVU5Hr1G063340	-0.796518	0.633588
	HORVU5Hr1G066260	0.73555	0.633588
	HORVU5Hr1G088920	0.706556	0.633588
	HORVU5Hr1G089050	0.62865	0.633588
	HORVU5Hr1G095120	0.789708	0.633588
	HORVU5Hr1G098300	-0.609574	0.633588
	HORVU7Hr1G024940	0.758823	0.633588
	HORVU7Hr1G062090	0.612265	0.633588
	HORVU7Hr1G083850	0.750254	0.633588
	HORVU7Hr1G085060	0.595458	0.633588
	HORVU4Hr1G011730	-0.698472	0.633588
	HORVU6Hr1G033970	-0.67213	0.633588
	HORVU6Hr1G034150	-0.632136	0.633588
	HORVU6Hr1G078770	0.564135	0.633588
	HORVU6Hr1G087220	0.622804	0.633588
	HORVU6Hr1G095270	0.643221	0.633588
	HORVU1Hr1G025690	0.533618	0.633588
	HORVU3Hr1G024490	-0.775756	0.636864
	HORVU4Hr1G015040	-0.784036	0.636864
	HORVU3Hr1G007230	-0.790795	0.63711
	HORVU5Hr1G013360	0.729101	0.63711
	HORVU4Hr1G071270	0.685387	0.63711
	HORVU2Hr1G065080	-0.611071	0.638272
	HORVU4Hr1G008420	-0.789361	0.638272
	HORVU6Hr1G048600	-0.777533	0.638272
	HORVU2Hr1G111610	0.690344	0.641055
	HORVU2Hr1G017080	0.716682	0.641931
	HORVU2Hr1G089210	0.764377	0.641931
	HORVU2Hr1G103330	-0.742783	0.641931
	HORVU3Hr1G034540	-0.766384	0.641931
	HORVU6Hr1G033160	-0.605056	0.641931
	HORVU1Hr1G066470	0.783509	0.641931
	HORVU3Hr1G092090	-0.755726	0.642535
	HORVU3Hr1G063640	0.786605	0.645755
	HORVU2Hr1G125950	-0.670137	0.649362
	HORVU5Hr1G028030	-0.657069	0.649362
	HORVU5Hr1G075810	0.630036	0.649362
	HORVU7Hr1G002110	-0.696897	0.649362
	HORVU7Hr1G026540	0.597358	0.649362
	HORVU7Hr1G106540	0.484042	0.649362
	HORVU6Hr1G014650	-0.775309	0.650621
	HORVU2Hr1G022140	0.750906	0.652754
	HORVU3Hr1G010190	-0.778166	0.652754
	HORVU3Hr1G036960	0.781209	0.652754
	HORVU4Hr1G077360	0.656968	0.652754
	HORVU6Hr1G021700	-0.601176	0.652754
	HORVU6Hr1G077120	0.778581	0.652754
	HORVU2Hr1G041590	-0.697754	0.653529
	HORVU4Hr1G010610	-0.742322	0.653529
	HORVU4Hr1G087580	-0.680975	0.654276
	HORVU7Hr1G045330	-0.547762	0.656012
	HORVU4Hr1G012750	-0.780596	0.656012
	HORVU4Hr1G013460	0.69887	0.656625
	HORVU6Hr1G070290	0.509832	0.656625
	HORVU5Hr1G009890	0.677921	0.657628
	HORVU6Hr1G012640	0.777997	0.657628
	HORVU6Hr1G070610	-0.741467	0.657628
	HORVU6Hr1G073100	-0.638406	0.657628
	HORVU6Hr1G083620	-0.591551	0.657628
	HORVU1Hr1G072500	0.582913	0.660229
	HORVU1Hr1G074380	0.662273	0.662545
	HORVU1Hr1G074550	-0.772324	0.667054
	HORVU4Hr1G000070	-0.746457	0.667529
	HORVU7Hr1G098110	0.58292	0.668031
	HORVU3Hr1G058610	0.695466	0.669974
	HORVU7Hr1G101530	0.61742	0.669974
	HORVU5Hr1G109720	0.774862	0.67008
	HORVU7Hr1G074580	0.569707	0.672211
	HORVU3Hr1G006940	-0.741574	0.673864
	HORVU3Hr1G100350	-0.474872	0.673864
	HORVU5Hr1G051790	-0.590775	0.673864
	HORVU7Hr1G077860	0.77147	0.673864
	HORVU4Hr1G074770	-0.753765	0.673864
	HORVU6Hr1G068640	-0.613949	0.673864
	HORVU6Hr1G072230	-0.53827	0.673864
	HORVU0Hr1G007370	0.682559	0.673864
	HORVU2Hr1G002880	0.742462	0.675493
	HORVU3Hr1G024210	-0.691968	0.677957
	HORVU2Hr1G032690	0.57049	0.680503
	HORVU4Hr1G055500	-0.549775	0.680503
	HORVU4Hr1G089490	0.740493	0.681662
	HORVU5Hr1G093450	0.680306	0.686051
	HORVU4Hr1G021930	-0.763276	0.686051
	HORVU1Hr1G044530	-0.592603	0.688402
	HORVU5Hr1G120210	-0.756764	0.688509
	HORVU2Hr1G004640	0.763034	0.688849
	HORVU2Hr1G037940	0.6626	0.688849
	HORVU2Hr1G066790	0.581006	0.688849
	HORVU2Hr1G076180	-0.596163	0.688849
	HORVU1Hr1G082670	-0.564071	0.688849
	HORVU5Hr1G068500	-0.701842	0.691772
	HORVU5Hr1G006780	0.553144	0.691834
	HORVU7Hr1G113080	-0.765326	0.691834
	HORVU3Hr1G030980	0.621035	0.692394
	HORVU5Hr1G095480	0.566166	0.692394
	HORVU7Hr1G083070	0.637675	0.692394
	HORVU3Hr1G085180	0.539223	0.694476
	HORVU0Hr1G023360	0.671786	0.694476
	HORVU5Hr1G098360	0.60178	0.695076
	HORVU2Hr1G092820	-0.626804	0.695631
	HORVU3Hr1G065000	-0.698186	0.695631
	HORVU7Hr1G107050	0.667206	0.695631
	HORVU6Hr1G091230	-0.760926	0.695631
	HORVU1Hr1G078120	-0.73938	0.695631
	HORVU6Hr1G008640	-0.611305	0.696112
	HORVU2Hr1G011430	-0.683408	0.696601
	HORVU2Hr1G022080	-0.74024	0.696601
	HORVU3Hr1G086240	0.719933	0.696601
	HORVU7Hr1G115600	0.518884	0.696601
	HORVU4Hr1G020130	-0.69379	0.696601
	HORVU4Hr1G023570	0.58578	0.696601
	HORVU4Hr1G026210	0.525315	0.696601
	HORVU4Hr1G088840	0.690963	0.696601
	HORVU6Hr1G027650	0.657597	0.696601
	HORVU1Hr1G067080	0.687119	0.696601
	HORVU1Hr1G007830	0.575667	0.69772
	HORVU4Hr1G019980	0.598692	0.698898
	HORVU2Hr1G002500	0.596204	0.699889
	HORVU2Hr1G009580	0.50973	0.699889
	HORVU5Hr1G018340	-0.671112	0.699889
	HORVU5Hr1G098190	-0.550578	0.699889
	HORVU7Hr1G079600	0.745361	0.699889
	HORVU4Hr1G014480	-0.758575	0.699889
	HORVU6Hr1G022360	-0.73917	0.699889
	HORVU1Hr1G000710	0.530766	0.699889
	HORVU2Hr1G098110	-0.747462	0.70009
	HORVU3Hr1G029770	0.602201	0.70009
	HORVU7Hr1G083550	0.651131	0.70009
	HORVU7Hr1G085180	0.530919	0.70009
	HORVU2Hr1G006230	-0.71232	0.700321
	HORVU2Hr1G015720	-0.754947	0.700321
	HORVU2Hr1G091320	-0.498678	0.700321
	HORVU2Hr1G098820	0.535272	0.700321
	HORVU2Hr1G107550	0.643691	0.700321
	HORVU3Hr1G025820	-0.568458	0.700321
	HORVU3Hr1G096280	0.743027	0.700321
	HORVU3Hr1G108300	0.654238	0.700321
	HORVU5Hr1G037600	0.465547	0.700321
	HORVU5Hr1G061930	-0.73416	0.700321
	HORVU4Hr1G059090	-0.53583	0.700321
	HORVU6Hr1G065970	0.69403	0.700321
	ENSRNA049485490	0.731323	0.700321
	HORVU1Hr1G002310	0.74065	0.700321
	HORVU1Hr1G023510	-0.615625	0.700321
	HORVU2Hr1G022540	-0.622899	0.702887
	HORVU3Hr1G075150	0.575355	0.702887
	HORVU2Hr1G034540	0.509277	0.702904
	HORVU2Hr1G056440	0.601934	0.702904
	HORVU2Hr1G116390	0.422007	0.702904
	HORVU3Hr1G038050	0.663455	0.702904
	HORVU3Hr1G058830	0.451353	0.702904
	HORVU3Hr1G061080	0.63906	0.702904
	HORVU3Hr1G087540	-0.750665	0.702904
	HORVU5Hr1G023710	0.738498	0.702904
	HORVU5Hr1G061950	-0.747059	0.702904
	HORVU5Hr1G080530	-0.493243	0.702904
	HORVU5Hr1G088430	-0.712552	0.702904
	HORVU5Hr1G123590	-0.49234	0.702904
	HORVU7Hr1G000120	0.685674	0.702904
	HORVU7Hr1G003870	-0.580347	0.702904
	HORVU7Hr1G039890	0.56334	0.702904
	HORVU7Hr1G079450	-0.490167	0.702904
	HORVU4Hr1G039400	-0.713377	0.702904
	HORVU6Hr1G015500	-0.524025	0.702904
	HORVU6Hr1G078760	0.528554	0.702904
	HORVU6Hr1G085320	-0.744536	0.702904
	HORVU1Hr1G000340	0.713152	0.702904
	HORVU1Hr1G004200	-0.652995	0.702904
	HORVU1Hr1G066340	-0.751463	0.702904
	HORVU1Hr1G082650	-0.710533	0.702904
	HORVU0Hr1G000050	-0.59897	0.702904
	HORVU0Hr1G040490	0.627647	0.702904
	HORVU2Hr1G062880	0.653582	0.704257
	HORVU2Hr1G066970	-0.683345	0.704257
	HORVU2Hr1G092530	0.723127	0.704257
	HORVU2Hr1G095720	-0.651741	0.704257
	HORVU2Hr1G118060	0.616074	0.704257
	HORVU3Hr1G014590	-0.685085	0.704257
	HORVU3Hr1G065770	0.591554	0.704257
	HORVU5Hr1G001320	0.615947	0.704257
	HORVU5Hr1G075420	0.523997	0.704257
	HORVU5Hr1G114890	0.551273	0.704257
	HORVU7Hr1G001830	0.572066	0.704257
	HORVU7Hr1G026040	-0.713501	0.704257
	HORVU4Hr1G010540	0.638263	0.704257
	HORVU4Hr1G056770	0.476394	0.704257
	HORVU4Hr1G088080	0.633036	0.704257
	HORVU6Hr1G079030	0.670105	0.704257
	HORVU6Hr1G087460	0.445687	0.704257
	HORVU0Hr1G000280	0.615612	0.704257
	HORVU6Hr1G057630	-0.727983	0.705963
	HORVU5Hr1G032290	0.626333	0.706191
	HORVU4Hr1G007620	-0.699823	0.706955
	HORVU1Hr1G025670	-0.572078	0.707526
	HORVU7Hr1G037870	0.670816	0.708069
	HORVU2Hr1G066680	-0.527376	0.70824
	HORVU1Hr1G076870	0.527437	0.70824
	HORVU2Hr1G013730	-0.463165	0.708865
	HORVU2Hr1G030950	-0.729807	0.711289
	HORVU4Hr1G063640	0.497879	0.711289
	HORVU1Hr1G095410	-0.709664	0.711289
	HORVU2Hr1G087390	0.451721	0.713158
	HORVU7Hr1G032360	-0.742441	0.713158
	HORVU1Hr1G024710	0.51206	0.713158
	HORVU0Hr1G017360	0.526899	0.713158
	HORVU2Hr1G043330	0.62411	0.71453
	HORVU5Hr1G098640	0.699824	0.71453
	HORVU2Hr1G007990	0.737584	0.714964
	HORVU2Hr1G043840	0.525162	0.714964
	HORVU2Hr1G108050	0.594032	0.714964
	HORVU3Hr1G063630	0.72645	0.714964
	HORVU5Hr1G084920	-0.676401	0.714964
	HORVU4Hr1G003820	-0.593305	0.714964
	HORVU4Hr1G079860	-0.740151	0.714964
	HORVU6Hr1G055840	0.515638	0.714964
	HORVU6Hr1G057500	-0.660694	0.714964
	HORVU6Hr1G084310	-0.716693	0.714964
	HORVU1Hr1G050830	0.45179	0.714964
	HORVU1Hr1G076530	-0.622831	0.714964
	HORVU1Hr1G093350	0.624047	0.714964
	HORVU2Hr1G019820	-0.573365	0.717904
	HORVU2Hr1G021320	0.617823	0.717904
	HORVU2Hr1G062910	-0.614788	0.717904
	HORVU2Hr1G067330	0.649019	0.717904
	HORVU2Hr1G080100	0.546488	0.717904
	HORVU2Hr1G080430	0.724663	0.717904
	HORVU2Hr1G121880	0.67744	0.717904
	HORVU3Hr1G003470	0.513723	0.717904
	HORVU3Hr1G028060	0.592635	0.717904
	HORVU3Hr1G059140	0.446641	0.717904
	HORVU3Hr1G082230	0.52429	0.717904
	HORVU5Hr1G116320	0.687849	0.717904
	HORVU5Hr1G123540	-0.688852	0.717904
	HORVU7Hr1G058120	-0.604313	0.717904
	HORVU7Hr1G100040	-0.712598	0.717904
	HORVU4Hr1G008700	0.548212	0.717904
	HORVU4Hr1G058180	0.594989	0.717904
	HORVU4Hr1G070070	0.513386	0.717904
	HORVU4Hr1G085940	-0.652892	0.717904
	HORVU6Hr1G018370	-0.515614	0.717904
	HORVU6Hr1G027640	-0.716372	0.717904
	HORVU6Hr1G087780	0.613056	0.717904
	HORVU1Hr1G056280	-0.717528	0.717904
	HORVU7Hr1G036130	-0.563196	0.718754
	HORVU4Hr1G072750	-0.580609	0.718858
	HORVU7Hr1G018230	-0.724627	0.71933
	HORVU2Hr1G049640	-0.732797	0.719828
	HORVU2Hr1G081890	0.714224	0.719828
	HORVU3Hr1G071550	0.674117	0.719828
	HORVU3Hr1G085080	0.724482	0.719828
	HORVU5Hr1G014920	-0.610189	0.719828
	HORVU5Hr1G097440	-0.73033	0.719828
	HORVU7Hr1G065420	-0.533028	0.719828
	HORVU4Hr1G014800	-0.614354	0.719828
	HORVU6Hr1G071980	-0.733399	0.719828
	HORVU1Hr1G067070	0.678519	0.719828
	HORVU7Hr1G088190	-0.685468	0.719848
	HORVU3Hr1G094800	-0.71847	0.72018
	HORVU1Hr1G058860	0.41223	0.720789
	HORVU5Hr1G114090	-0.622476	0.721139
	HORVU2Hr1G061090	-0.543923	0.721379
	HORVU2Hr1G081440	-0.724344	0.721379
	HORVU6Hr1G013680	0.570255	0.721379
	HORVU6Hr1G068720	-0.718923	0.721379
	HORVU1Hr1G030390	-0.508795	0.721379
	HORVU3Hr1G073230	0.505286	0.721858
	HORVU3Hr1G098360	-0.516382	0.721858
	HORVU7Hr1G039780	-0.514655	0.721858
	HORVU6Hr1G020570	-0.724401	0.721858
	HORVU1Hr1G065670	0.716414	0.721858
	HORVU5Hr1G021730	0.552004	0.722588
	HORVU5Hr1G030040	0.545857	0.722588
	HORVU7Hr1G036780	-0.591154	0.722588
	HORVU7Hr1G039140	-0.605616	0.722588
	HORVU4Hr1G080940	0.604056	0.722588
	HORVU5Hr1G036460	0.476543	0.723353
	HORVU4Hr1G015250	0.535058	0.724008
	HORVU4Hr1G023670	0.61338	0.724187
	HORVU2Hr1G121630	-0.47099	0.72595
	HORVU7Hr1G030690	0.430556	0.726261
	HORVU3Hr1G096620	-0.497782	0.727166
	HORVU3Hr1G065950	0.6316	0.728962
	HORVU3Hr1G086020	-0.482737	0.728962
	HORVU3Hr1G089650	-0.635317	0.728962
	HORVU3Hr1G111600	-0.711087	0.728962
	HORVU3Hr1G112520	-0.72613	0.728962
	HORVU7Hr1G012280	0.672882	0.728962
	HORVU7Hr1G117550	0.685437	0.728962
	HORVU4Hr1G016840	0.621056	0.728962
	HORVU6Hr1G006840	-0.557913	0.728962
	HORVU1Hr1G027420	0.447768	0.728962
	HORVU1Hr1G068950	-0.691955	0.728962
	HORVU1Hr1G080980	0.44892	0.728962
	HORVU2Hr1G021150	0.705356	0.730215
	HORVU2Hr1G039930	0.465202	0.730215
	HORVU2Hr1G115240	-0.70973	0.730215
	HORVU2Hr1G125430	0.717814	0.730215
	HORVU5Hr1G036620	0.563217	0.730215
	HORVU5Hr1G040990	-0.613745	0.730215
	HORVU7Hr1G027770	0.722815	0.730215
	HORVU7Hr1G040110	-0.610006	0.730215
	HORVU7Hr1G116600	0.450342	0.730215
	HORVU4Hr1G000100	0.465536	0.730215
	HORVU4Hr1G031010	-0.453183	0.730215
	HORVU4Hr1G037680	0.584649	0.730215
	HORVU4Hr1G053660	0.480038	0.730215
	HORVU4Hr1G056740	0.518	0.730215
	HORVU4Hr1G057550	-0.565736	0.730215
	HORVU6Hr1G034250	0.706845	0.730215
	HORVU1Hr1G043900	-0.514257	0.730215
	HORVU1Hr1G073680	0.643307	0.730215
	EPlHVUG00000039822	-0.537173	0.730215
	HORVU2Hr1G085270	0.645787	0.730217
	HORVU1Hr1G028920	-0.722122	0.730217
	HORVU2Hr1G007840	0.472818	0.731666
	HORVU2Hr1G034630	0.688886	0.731666
	HORVU2Hr1G112580	-0.694143	0.731666
	HORVU3Hr1G036020	-0.679894	0.731666
	HORVU5Hr1G082830	-0.701815	0.731666
	HORVU5Hr1G112280	0.509393	0.731666
	HORVU7Hr1G096350	-0.701682	0.731666
	HORVU1Hr1G092850	0.705325	0.731666
	HORVU2Hr1G030660	-0.54553	0.732023
	HORVU2Hr1G052430	-0.478565	0.732023
	HORVU5Hr1G011400	0.653417	0.732023
	HORVU5Hr1G084900	-0.614513	0.732023
	HORVU7Hr1G029920	0.714022	0.732023
	HORVU4Hr1G021500	-0.675718	0.732023
	HORVU6Hr1G016850	0.683145	0.732023
	HORVU6Hr1G031960	-0.663342	0.732023
	HORVU6Hr1G058930	0.518186	0.732023
	HORVU6Hr1G067880	0.714357	0.732023
	HORVU1Hr1G051970	-0.705332	0.732023
	HORVU7Hr1G051000	-0.631091	0.733656
	HORVU3Hr1G096210	0.537505	0.734599
	HORVU5Hr1G041830	-0.600884	0.734599
	HORVU7Hr1G096750	0.582729	0.734599
	HORVU0Hr1G018830	0.615633	0.734599
	HORVU4Hr1G074270	0.597455	0.734789
	HORVU2Hr1G012200	-0.688609	0.736583
	HORVU2Hr1G011960	0.659328	0.737248
	HORVU2Hr1G099470	-0.64088	0.737248
	HORVU3Hr1G032570	-0.533127	0.737248
	HORVU3Hr1G055910	0.714797	0.737248
	HORVU3Hr1G115540	-0.623543	0.737248
	HORVU5Hr1G010950	-0.683393	0.737248
	HORVU5Hr1G045990	-0.619535	0.737248
	HORVU5Hr1G104160	0.539445	0.737248
	HORVU7Hr1G044160	-0.715598	0.737248
	HORVU7Hr1G060970	-0.52609	0.737248
	HORVU4Hr1G001450	-0.630089	0.737248
	HORVU4Hr1G020480	-0.572341	0.737248
	HORVU4Hr1G022630	0.673495	0.737248
	HORVU4Hr1G026870	-0.546838	0.737248
	HORVU4Hr1G028720	-0.7118	0.737248
	HORVU4Hr1G068500	0.568974	0.737248
	HORVU4Hr1G082020	0.703367	0.737248
	HORVU4Hr1G086650	-0.52999	0.737248
	HORVU6Hr1G009910	-0.714782	0.737248
	HORVU6Hr1G042860	0.514025	0.737248
	HORVU6Hr1G077540	-0.475174	0.737248
	HORVU1Hr1G074820	0.572457	0.737248
	HORVU1Hr1G081980	0.488622	0.737248
	HORVU2Hr1G066950	-0.601769	0.738119
	HORVU1Hr1G064970	-0.681806	0.738119
	HORVU2Hr1G022600	-0.539555	0.738245
	HORVU3Hr1G059610	-0.712083	0.738245
	HORVU5Hr1G122820	0.411997	0.738245
	HORVU4Hr1G013180	-0.706907	0.738245
	HORVU6Hr1G029750	0.523277	0.738245
	HORVU6Hr1G059710	0.59187	0.738245
	HORVU1Hr1G061090	-0.585197	0.738245
	HORVU1Hr1G088280	-0.700044	0.738245
	HORVU2Hr1G035160	0.632907	0.73872
	HORVU5Hr1G060060	-0.624149	0.73872
	HORVU1Hr1G081570	0.689532	0.738802
	HORVU1Hr1G081900	-0.473623	0.738802
	HORVU2Hr1G086390	0.526381	0.740492
	HORVU3Hr1G052710	0.598058	0.740492
	HORVU3Hr1G104500	0.707591	0.740492
	HORVU7Hr1G108790	0.702967	0.740492
	HORVU4Hr1G076100	0.490955	0.740492
	HORVU0Hr1G022280	-0.541834	0.740492
	HORVU2Hr1G080460	-0.693746	0.741493
	HORVU3Hr1G080130	0.574324	0.741493
	HORVU5Hr1G087780	-0.660747	0.741493
	ENSRNA049489014	0.705428	0.741493
	HORVU4Hr1G083050	-0.70684	0.741493
	HORVU1Hr1G095210	-0.517495	0.741493
	HORVU2Hr1G043170	0.610208	0.743446
	HORVU2Hr1G046530	0.481976	0.743512
	HORVU3Hr1G070610	0.633248	0.743512
	HORVU6Hr1G015390	0.652931	0.743512
	HORVU6Hr1G060140	-0.648426	0.743512
	HORVU1Hr1G075780	0.654936	0.743512
	HORVU1Hr1G007600	-0.65871	0.744192
	HORVU7Hr1G116640	-0.548378	0.74567
	HORVU4Hr1G058560	-0.699019	0.74567
	HORVU4Hr1G090210	-0.693771	0.74567
	HORVU6Hr1G009850	0.514174	0.74567
	HORVU6Hr1G020960	0.538272	0.74567
	HORVU6Hr1G035420	0.518077	0.74567
	ENSRNA049485481	0.706826	0.74567
	HORVU1Hr1G021700	0.595552	0.74567
	HORVU1Hr1G051740	0.526939	0.74567
	HORVU6Hr1G012400	-0.565378	0.746334
	HORVU3Hr1G086030	-0.592443	0.747891
	HORVU2Hr1G093960	0.570542	0.749445
	HORVU7Hr1G079160	0.700834	0.749445
	HORVU5Hr1G124450	-0.560182	0.750584
	HORVU5Hr1G058740	-0.691142	0.751673
	ENSRNA049489214	0.658446	0.751675
	HORVU5Hr1G014310	-0.513514	0.752028
	HORVU6Hr1G080490	-0.664224	0.752028
	HORVU5Hr1G096310	-0.692648	0.75224
	HORVU1Hr1G063310	-0.473884	0.75224
	HORVU0Hr1G016330	0.452684	0.752938
	HORVU6Hr1G040310	0.453639	0.75373
	HORVU5Hr1G092880	-0.640682	0.75422
	HORVU7Hr1G041500	0.459671	0.75422
	HORVU6Hr1G050440	-0.505793	0.75422
	HORVU3Hr1G072340	0.624618	0.755683
	HORVU5Hr1G106390	-0.51958	0.755683
	HORVU7Hr1G075360	0.472223	0.755683
	HORVU4Hr1G005250	0.613568	0.755683
	HORVU6Hr1G037760	0.644311	0.755683
	HORVU2Hr1G031310	-0.456238	0.755841
	HORVU7Hr1G040740	-0.680608	0.755841
	HORVU6Hr1G079560	-0.559995	0.755841
	HORVU1Hr1G036040	0.603188	0.757108
	HORVU1Hr1G058090	-0.583456	0.759228
	HORVU4Hr1G054240	0.519295	0.760119
	HORVU6Hr1G004010	0.68026	0.760119
	HORVU6Hr1G058740	-0.609014	0.760119
	HORVU2Hr1G021560	0.634901	0.760825
	HORVU6Hr1G080400	-0.676355	0.760848
	HORVU2Hr1G011420	-0.597672	0.760906
	HORVU5Hr1G039370	-0.50271	0.760906
	HORVU7Hr1G026000	0.580975	0.760906
	HORVU4Hr1G018650	0.418011	0.760906
	HORVU4Hr1G084840	-0.693991	0.760906
	HORVU6Hr1G076760	0.44247	0.760906
	HORVU1Hr1G032060	0.590553	0.760906
	HORVU5Hr1G037910	-0.541103	0.761235
	HORVU2Hr1G024150	-0.510055	0.763221
	HORVU7Hr1G075300	0.568523	0.763221
	HORVU7Hr1G113560	0.694127	0.763221
	HORVU4Hr1G011370	-0.566663	0.763221
	HORVU6Hr1G039940	-0.53886	0.763221
	HORVU1Hr1G000720	0.461842	0.763221
	HORVU1Hr1G042270	0.438961	0.763221
	HORVU1Hr1G055000	-0.489979	0.763221
	HORVU1Hr1G088140	-0.507637	0.764176
	ENSRNA050017402	-0.672942	0.765733
	HORVU5Hr1G061870	0.60056	0.765733
	HORVU5Hr1G078950	-0.508258	0.765733
	HORVU7Hr1G013710	0.43484	0.765733
	HORVU7Hr1G106480	-0.67775	0.765733
	HORVU1Hr1G087340	0.448921	0.765733
	HORVU2Hr1G025090	0.48328	0.766194
	HORVU5Hr1G028550	-0.669732	0.766194
	HORVU4Hr1G068710	-0.602033	0.766793
	HORVU2Hr1G039100	0.546448	0.767899
	HORVU2Hr1G102790	0.64942	0.767899
	HORVU2Hr1G009970	-0.580007	0.768239
	HORVU2Hr1G020270	-0.43666	0.768239
	HORVU2Hr1G091910	0.481161	0.768239
	HORVU2Hr1G095320	0.691192	0.768239
	HORVU2Hr1G102120	-0.548529	0.768239
	HORVU2Hr1G109910	0.642837	0.768239
	HORVU3Hr1G003980	-0.602137	0.768239
	HORVU3Hr1G081230	0.685193	0.768239
	HORVU5Hr1G040210	-0.480981	0.768239
	HORVU5Hr1G097020	0.524657	0.768239
	HORVU7Hr1G041610	-0.58379	0.768239
	HORVU7Hr1G060640	-0.457097	0.768239
	HORVU7Hr1G097430	-0.647421	0.768239
	HORVU4Hr1G052070	-0.662558	0.768239
	HORVU6Hr1G086940	-0.601965	0.768239
	HORVU1Hr1G046400	0.547793	0.768239
	HORVU1Hr1G063030	-0.597306	0.768239
	HORVU1Hr1G080920	0.631601	0.768239
	HORVU2Hr1G002710	0.547526	0.76868
	HORVU3Hr1G019920	0.502416	0.768688
	HORVU2Hr1G111640	-0.476108	0.769362
	HORVU7Hr1G038270	0.560924	0.770235
	HORVU2Hr1G083780	0.616732	0.771843
	HORVU2Hr1G113560	-0.627547	0.771843
	HORVU3Hr1G001450	-0.603909	0.771843
	HORVU3Hr1G027220	0.494096	0.771843
	HORVU3Hr1G028810	0.651717	0.771843
	HORVU5Hr1G048300	-0.543934	0.771843
	HORVU5Hr1G059310	-0.637072	0.771843
	HORVU5Hr1G076080	-0.55707	0.771843
	HORVU7Hr1G017190	0.459183	0.771843
	HORVU7Hr1G017780	0.583999	0.771843
	HORVU7Hr1G073870	-0.473074	0.771843
	HORVU0Hr1G013850	-0.565216	0.771843
	HORVU2Hr1G020690	0.595791	0.771933
	HORVU2Hr1G088180	0.663516	0.771933
	HORVU2Hr1G105100	0.521162	0.771933
	HORVU2Hr1G121830	-0.674234	0.771933
	HORVU2Hr1G122330	0.563845	0.771933
	HORVU3Hr1G013840	-0.458128	0.771933
	HORVU3Hr1G037280	-0.505047	0.771933
	HORVU3Hr1G056370	-0.675701	0.771933
	HORVU3Hr1G108100	0.648704	0.771933
	HORVU5Hr1G095130	-0.685492	0.771933
	HORVU7Hr1G010290	0.490883	0.771933
	HORVU7Hr1G037470	-0.505585	0.771933
	HORVU7Hr1G093020	0.479714	0.771933
	HORVU7Hr1G117320	0.601198	0.771933
	HORVU4Hr1G004880	-0.600383	0.771933
	HORVU4Hr1G009960	0.626173	0.771933
	HORVU4Hr1G065080	0.541612	0.771933
	HORVU4Hr1G066750	0.647383	0.771933
	HORVU4Hr1G081100	0.391103	0.771933
	HORVU1Hr1G028200	-0.627326	0.771933
	HORVU1Hr1G081240	0.528434	0.771933
	HORVU6Hr1G075780	0.409134	0.772493
	HORVU1Hr1G058770	0.483617	0.772493
	HORVU2Hr1G011140	0.611031	0.774102
	HORVU2Hr1G102580	-0.676984	0.774102
	HORVU5Hr1G111480	0.562873	0.774102
	HORVU4Hr1G053130	0.562545	0.774102
	HORVU1Hr1G059130	-0.502323	0.774102
	HORVU1Hr1G088560	0.513065	0.774102
	HORVU3Hr1G043730	0.525606	0.774199
	HORVU5Hr1G037290	0.466636	0.774199
	HORVU6Hr1G035820	0.504894	0.774721
	HORVU3Hr1G069730	0.55373	0.775425
	HORVU4Hr1G000090	-0.515992	0.775425
	HORVU7Hr1G050530	0.618796	0.775441
	HORVU2Hr1G035830	-0.527623	0.775582
	HORVU5Hr1G069980	0.68236	0.775582
	HORVU5Hr1G076710	-0.641625	0.775582
	HORVU7Hr1G035320	0.544049	0.775582
	HORVU4Hr1G000910	0.599523	0.775582
	HORVU4Hr1G052470	-0.558533	0.775582
	HORVU6Hr1G028020	-0.598473	0.775582
	HORVU1Hr1G068320	-0.622143	0.775582
	HORVU4Hr1G077250	0.409291	0.77686
	HORVU6Hr1G037940	0.545057	0.77686
	HORVU2Hr1G024550	-0.50428	0.777273
	HORVU2Hr1G098680	-0.655043	0.777784
	HORVU2Hr1G039070	0.565897	0.778163
	HORVU2Hr1G089020	-0.666001	0.778163
	HORVU2Hr1G121030	0.541637	0.778163
	HORVU3Hr1G031800	-0.476904	0.778163
	HORVU3Hr1G054330	0.653888	0.778163
	HORVU6Hr1G072640	0.607422	0.778163
	HORVU1Hr1G041740	0.541809	0.778163
	HORVU1Hr1G083750	0.574212	0.778163
	HORVU0Hr1G023280	0.46741	0.778163
	HORVU6Hr1G026230	0.574003	0.779812
	HORVU2Hr1G065000	-0.672698	0.780369
	HORVU3Hr1G085210	-0.510294	0.780369
	HORVU5Hr1G093040	-0.674118	0.780369
	HORVU7Hr1G052770	-0.423362	0.780369
	HORVU2Hr1G114580	0.386356	0.780571
	HORVU5Hr1G071140	0.667324	0.782462
	HORVU3Hr1G007460	0.506439	0.784802
	HORVU5Hr1G035820	0.561664	0.784802
	HORVU5Hr1G061300	-0.632921	0.784802
	HORVU5Hr1G096210	-0.673039	0.784802
	HORVU7Hr1G009800	-0.575341	0.784802
	HORVU7Hr1G019680	0.463128	0.784802
	HORVU7Hr1G077790	-0.562989	0.784802
	HORVU7Hr1G091100	-0.525118	0.784802
	HORVU1Hr1G019770	0.657065	0.784802
	HORVU1Hr1G054470	-0.508478	0.784802
	HORVU1Hr1G065620	-0.533185	0.784802
	HORVU1Hr1G068740	-0.539942	0.784802
	EPlHVUG00000039932	0.569735	0.784802
	HORVU1Hr1G050130	0.513165	0.78529
	HORVU5Hr1G056350	-0.570517	0.785474
	HORVU5Hr1G098780	0.466906	0.785474
	HORVU5Hr1G125650	-0.67568	0.785474
	HORVU4Hr1G072500	0.482541	0.785876
	HORVU6Hr1G011260	-0.529941	0.785876
	HORVU2Hr1G012360	0.591976	0.789394
	HORVU2Hr1G076660	0.51312	0.789405
	ENSRNA049482185	0.573807	0.789405
	HORVU2Hr1G099550	-0.452303	0.789405
	HORVU2Hr1G118570	-0.381302	0.789405
	HORVU2Hr1G126950	0.673579	0.789405
	HORVU3Hr1G033920	-0.449744	0.789405
	ENSRNA049469001	0.626085	0.789405
	HORVU1Hr1G016200	0.425332	0.789405
	HORVU1Hr1G023460	-0.669321	0.789405
	HORVU1Hr1G041890	0.543379	0.789405
	HORVU1Hr1G046990	-0.548165	0.789405
	HORVU1Hr1G064210	0.546055	0.789405
	HORVU1Hr1G073670	0.571783	0.789405
	HORVU7Hr1G092370	-0.481333	0.789531
	HORVU6Hr1G066610	0.621511	0.789531
	HORVU5Hr1G092850	-0.596211	0.789992
	HORVU3Hr1G099470	-0.619355	0.790502
	HORVU6Hr1G046160	0.642415	0.790502
	HORVU2Hr1G085720	0.490162	0.790622
	HORVU2Hr1G119680	-0.658328	0.790622
	HORVU3Hr1G082690	-0.438395	0.790622
	HORVU4Hr1G063050	0.537062	0.790622
	HORVU6Hr1G051760	0.55398	0.790622
	HORVU2Hr1G013420	-0.608341	0.790764
	HORVU5Hr1G080450	0.625192	0.790764
	HORVU5Hr1G112160	-0.477736	0.790764
	HORVU7Hr1G001040	0.505776	0.790764
	HORVU4Hr1G003800	0.497883	0.790764
	HORVU6Hr1G036760	0.608329	0.790764
	HORVU1Hr1G015910	-0.653073	0.790764
	HORVU1Hr1G025940	-0.399872	0.790764
	HORVU3Hr1G054240	0.5399	0.79102
	HORVU4Hr1G024290	-0.593172	0.79102
	HORVU1Hr1G075670	0.519884	0.79102
	HORVU2Hr1G068630	-0.655748	0.79119
	HORVU4Hr1G022680	-0.505896	0.79119
	HORVU4Hr1G056700	0.470456	0.79119
	HORVU6Hr1G079190	0.40988	0.79119
	HORVU5Hr1G082910	-0.659029	0.791379
	HORVU2Hr1G041110	0.447289	0.7923
	HORVU7Hr1G041520	-0.441759	0.793476
	HORVU7Hr1G113400	-0.533007	0.793476
	HORVU6Hr1G015130	-0.474404	0.793476
	HORVU1Hr1G035650	-0.609385	0.793476
	HORVU3Hr1G050240	-0.516152	0.793815
	HORVU2Hr1G015940	-0.520484	0.794653
	HORVU2Hr1G073030	0.482645	0.794653
	HORVU2Hr1G113330	0.634689	0.794653
	HORVU7Hr1G049200	-0.552354	0.794653
	HORVU4Hr1G036670	0.563986	0.794653
	HORVU4Hr1G070350	0.596023	0.794653
	HORVU1Hr1G078030	0.608725	0.794653
	HORVU1Hr1G069830	0.412453	0.795495
	HORVU2Hr1G081460	0.435089	0.795652
	HORVU2Hr1G004330	0.468925	0.795722
	HORVU5Hr1G102130	-0.656111	0.795722
	HORVU1Hr1G080520	-0.606758	0.795722
	HORVU7Hr1G075020	-0.6605	0.796308
	HORVU4Hr1G056120	0.564496	0.796308
	HORVU2Hr1G068120	0.483109	0.796529
	HORVU0Hr1G016480	-0.610514	0.798134
	HORVU3Hr1G017950	-0.579747	0.798974
	HORVU3Hr1G071320	0.487927	0.798974
	HORVU5Hr1G022510	0.411113	0.798974
	HORVU2Hr1G041540	0.388071	0.801865
	HORVU5Hr1G004650	0.624916	0.802115
	HORVU5Hr1G028410	-0.512557	0.802115
	HORVU7Hr1G085650	-0.507054	0.802115
	HORVU6Hr1G087090	-0.467566	0.802115
	ENSRNA050016287	0.663545	0.802115
	HORVU3Hr1G092840	0.364094	0.802511
	HORVU6Hr1G034110	0.56742	0.802511
	HORVU2Hr1G023260	-0.619631	0.803773
	HORVU2Hr1G032780	0.571339	0.803773
	HORVU2Hr1G064730	-0.487553	0.803773
	HORVU2Hr1G114900	-0.644059	0.803773
	HORVU2Hr1G115640	0.468324	0.803773
	HORVU2Hr1G121450	0.659879	0.803773
	HORVU3Hr1G002980	-0.653922	0.803773
	HORVU3Hr1G074960	0.559944	0.803773
	HORVU5Hr1G062310	0.451088	0.803773
	HORVU7Hr1G083480	0.538354	0.803773
	HORVU4Hr1G006260	-0.495914	0.803773
	HORVU6Hr1G027460	0.656566	0.803773
	HORVU6Hr1G066780	0.463266	0.803773
	HORVU1Hr1G065630	0.542878	0.803773
	EPlHVUG00000039840	-0.611155	0.803773
	HORVU1Hr1G018600	-0.643713	0.803984
	HORVU1Hr1G074340	0.568744	0.803984
	HORVU4Hr1G089030	-0.581409	0.804096
	HORVU1Hr1G095430	-0.649883	0.804096
	HORVU4Hr1G085690	0.489008	0.805134
	HORVU2Hr1G093680	0.571653	0.806116
	HORVU3Hr1G057530	0.421158	0.806826
	HORVU1Hr1G090430	-0.541197	0.806826
	HORVU4Hr1G012560	0.60253	0.807643
	HORVU3Hr1G006000	0.451292	0.808094
	HORVU5Hr1G119520	-0.626734	0.808094
	HORVU4Hr1G045370	0.503815	0.808094
	HORVU2Hr1G124860	0.572507	0.810333
	HORVU3Hr1G031330	0.504927	0.810333
	HORVU5Hr1G109430	0.42448	0.810333
	HORVU4Hr1G057330	-0.606588	0.810333
	HORVU2Hr1G091680	-0.49208	0.810918
	HORVU7Hr1G099580	-0.538936	0.810918
	HORVU1Hr1G084690	0.616091	0.811306
	ENSRNA049489337	0.61967	0.811306
	HORVU2Hr1G074130	0.547536	0.811512
	HORVU3Hr1G069520	0.393186	0.811512
	HORVU5Hr1G001750	-0.599399	0.811512
	HORVU5Hr1G019030	-0.403879	0.811512
	HORVU5Hr1G047060	0.656856	0.811512
	HORVU6Hr1G086770	-0.595488	0.811512
	HORVU1Hr1G039160	0.551591	0.811512
	HORVU2Hr1G077200	-0.57827	0.811766
	HORVU2Hr1G111300	-0.44219	0.811766
	HORVU7Hr1G067710	-0.57318	0.811766
	HORVU7Hr1G075720	-0.608171	0.811766
	HORVU4Hr1G060260	0.595208	0.811766
	HORVU2Hr1G099210	-0.559924	0.811913
	HORVU4Hr1G059950	-0.53256	0.811913
	HORVU2Hr1G013920	-0.653757	0.813739
	HORVU2Hr1G081750	-0.443371	0.813739
	HORVU2Hr1G118770	0.533436	0.813739
	HORVU3Hr1G006140	-0.509186	0.813739
	HORVU7Hr1G042880	-0.505074	0.813739
	HORVU1Hr1G007290	0.652035	0.813813
	HORVU2Hr1G114610	-0.478851	0.815046
	HORVU5Hr1G100770	-0.389424	0.815046
	HORVU5Hr1G114850	-0.571014	0.815046
	HORVU2Hr1G014580	0.470698	0.815375
	HORVU2Hr1G036960	-0.459258	0.815375
	HORVU2Hr1G117140	0.573051	0.815375
	HORVU2Hr1G121370	-0.528063	0.815375
	HORVU3Hr1G095760	-0.524315	0.815375
	HORVU3Hr1G107350	-0.651512	0.815375
	HORVU7Hr1G051110	-0.632811	0.815375
	HORVU4Hr1G056100	0.468107	0.815375
	HORVU4Hr1G059220	-0.63944	0.815375
	HORVU4Hr1G065560	0.635852	0.815375
	HORVU6Hr1G003910	0.486221	0.815375
	HORVU1Hr1G088040	0.509243	0.815375
	HORVU0Hr1G013800	0.557391	0.815375
	HORVU0Hr1G039040	0.54986	0.815375
	HORVU2Hr1G041430	-0.58072	0.815431
	HORVU3Hr1G077170	0.5331	0.815432
	HORVU3Hr1G090670	-0.414261	0.815715
	HORVU1Hr1G089430	0.4736	0.815903
	HORVU5Hr1G123550	-0.634795	0.816298
	HORVU5Hr1G098490	0.478909	0.816768
	HORVU6Hr1G042080	-0.576962	0.81689
	HORVU4Hr1G085680	0.527536	0.817291
	HORVU1Hr1G072060	0.564312	0.817398
	HORVU7Hr1G078500	-0.425884	0.817538
	HORVU6Hr1G009400	0.512518	0.817538
	HORVU6Hr1G046420	0.504662	0.817538
	HORVU5Hr1G123770	-0.450223	0.817674
	HORVU2Hr1G086920	0.521253	0.8181
	HORVU5Hr1G059430	-0.463076	0.818377
	HORVU7Hr1G113460	0.492389	0.818377
	HORVU4Hr1G012440	0.47123	0.818377
	HORVU1Hr1G007900	0.604162	0.818377
	HORVU1Hr1G047090	-0.58274	0.818377
	HORVU1Hr1G064530	0.409973	0.818377
	HORVU1Hr1G083330	-0.594904	0.818377
	HORVU7Hr1G108190	0.614108	0.818778
	HORVU7Hr1G035010	0.599887	0.818839
	HORVU2Hr1G044780	0.613053	0.819398
	HORVU7Hr1G022330	-0.591422	0.819398
	HORVU4Hr1G069990	-0.486657	0.819398
	HORVU3Hr1G097100	-0.547865	0.819487
	HORVU2Hr1G065030	-0.642522	0.821387
	HORVU3Hr1G031980	-0.476493	0.821387
	HORVU3Hr1G094300	-0.643831	0.821387
	HORVU7Hr1G049370	0.418606	0.821387
	HORVU6Hr1G035610	-0.506202	0.821387
	HORVU2Hr1G029270	-0.607667	0.823012
	HORVU3Hr1G052980	-0.540698	0.824589
	HORVU0Hr1G009380	-0.553446	0.824742
	HORVU4Hr1G040280	0.489091	0.824949
	HORVU2Hr1G104100	0.504107	0.825348
	HORVU2Hr1G106090	0.644076	0.825348
	HORVU3Hr1G018860	-0.463648	0.825348
	HORVU3Hr1G093400	0.526509	0.825348
	HORVU5Hr1G075350	-0.589429	0.825348
	HORVU5Hr1G101500	0.450628	0.825348
	HORVU5Hr1G119030	-0.630244	0.825348
	HORVU5Hr1G119510	-0.587499	0.825348
	HORVU7Hr1G007840	0.630597	0.825348
	HORVU7Hr1G022940	-0.617004	0.825348
	HORVU7Hr1G031850	0.521517	0.825348
	HORVU7Hr1G059290	-0.591117	0.825348
	HORVU7Hr1G068320	-0.590001	0.825348
	HORVU7Hr1G080990	0.441972	0.825348
	HORVU7Hr1G087050	0.427555	0.825348
	HORVU7Hr1G098260	-0.554625	0.825348
	HORVU7Hr1G102480	0.637513	0.825348
	HORVU7Hr1G108490	0.641141	0.825348
	HORVU4Hr1G021830	0.470062	0.825348
	HORVU4Hr1G043970	-0.457899	0.825348
	HORVU4Hr1G059010	-0.593773	0.825348
	HORVU4Hr1G060840	-0.469182	0.825348
	HORVU4Hr1G078820	0.556872	0.825348
	HORVU4Hr1G090780	-0.555992	0.825348
	HORVU6Hr1G001480	0.563535	0.825348
	HORVU6Hr1G083660	0.46417	0.825348
	HORVU6Hr1G092960	0.578825	0.825348
	HORVU1Hr1G063220	0.430922	0.825348
	HORVU1Hr1G065570	-0.595649	0.825348
	HORVU1Hr1G088270	0.477585	0.825348
	HORVU0Hr1G022580	0.532262	0.825348
	HORVU2Hr1G051810	0.639685	0.825439
	HORVU6Hr1G095080	0.548597	0.825439
	HORVU2Hr1G088840	0.635322	0.825544
	HORVU3Hr1G086050	0.431595	0.825544
	HORVU5Hr1G066250	0.491968	0.825544
	HORVU7Hr1G031180	-0.576966	0.825544
	HORVU7Hr1G116960	-0.414557	0.825544
	HORVU1Hr1G002760	0.593757	0.825544
	HORVU2Hr1G109120	-0.406242	0.82561
	HORVU7Hr1G081910	0.528844	0.826043
	HORVU5Hr1G021230	0.446496	0.826904
	HORVU4Hr1G019530	-0.4832	0.826904
	HORVU4Hr1G020540	0.456573	0.826904
	HORVU2Hr1G083080	-0.441917	0.827252
	HORVU1Hr1G008530	-0.566724	0.827252
	HORVU2Hr1G088420	0.598911	0.827268
	HORVU5Hr1G081620	-0.58848	0.827379
	HORVU5Hr1G023800	-0.526344	0.827638
	HORVU5Hr1G109710	-0.502725	0.827638
	HORVU4Hr1G038090	0.461935	0.827638
	HORVU1Hr1G070420	-0.634681	0.827886
	HORVU5Hr1G112440	0.5089	0.827974
	HORVU7Hr1G036090	0.395751	0.827974
	HORVU4Hr1G000310	-0.564755	0.827974
	HORVU6Hr1G001670	0.498551	0.827974
	HORVU1Hr1G019390	-0.52702	0.827974
	HORVU5Hr1G117770	0.516646	0.828437
	HORVU5Hr1G049440	-0.444374	0.829437
	HORVU2Hr1G027370	0.579046	0.829573
	HORVU3Hr1G116790	-0.591374	0.829573
	HORVU4Hr1G027970	0.537974	0.829573
	HORVU1Hr1G045220	0.42651	0.829573
	HORVU3Hr1G026930	-0.577455	0.829619
	HORVU3Hr1G105860	-0.491565	0.829619
	HORVU7Hr1G038140	-0.572994	0.829619
	HORVU7Hr1G079460	0.446195	0.829619
	HORVU7Hr1G110630	-0.521471	0.829619
	HORVU4Hr1G079030	-0.586569	0.829619
	HORVU4Hr1G090550	-0.582072	0.829619
	HORVU6Hr1G000780	0.622144	0.829848
	HORVU2Hr1G015980	-0.629956	0.830173
	HORVU2Hr1G065650	-0.430127	0.830173
	HORVU2Hr1G067870	-0.628413	0.830173
	HORVU2Hr1G078860	0.422928	0.830173
	HORVU3Hr1G001510	-0.63204	0.830173
	HORVU3Hr1G033520	-0.405472	0.830173
	HORVU3Hr1G061870	-0.511222	0.830173
	HORVU3Hr1G072320	0.471738	0.830173
	HORVU3Hr1G083190	-0.606192	0.830173
	HORVU5Hr1G019080	-0.548351	0.830173
	HORVU5Hr1G024060	-0.379771	0.830173
	HORVU5Hr1G076700	0.505789	0.830173
	HORVU5Hr1G095080	0.363528	0.830173
	HORVU5Hr1G098770	0.539245	0.830173
	HORVU7Hr1G081290	0.62021	0.830173
	HORVU4Hr1G055160	-0.560393	0.830173
	HORVU6Hr1G053100	0.371266	0.830173
	HORVU6Hr1G053910	0.492683	0.830173
	HORVU1Hr1G058100	-0.480472	0.830173
	HORVU1Hr1G058490	0.545588	0.830173
	HORVU1Hr1G058700	-0.635423	0.830173
	HORVU7Hr1G042160	-0.467929	0.830671
	HORVU1Hr1G075920	0.460052	0.830671
	HORVU2Hr1G039910	0.633644	0.831115
	HORVU5Hr1G057460	0.495443	0.831115
	HORVU6Hr1G059940	0.585303	0.831115
	HORVU1Hr1G063740	-0.549386	0.831115
	HORVU5Hr1G022760	0.451723	0.83122
	HORVU4Hr1G083170	0.627241	0.83122
	HORVU1Hr1G075110	-0.414979	0.831945
	HORVU5Hr1G124010	-0.418535	0.832021
	HORVU6Hr1G084860	0.483398	0.832393
	HORVU2Hr1G093640	-0.632917	0.832421
	HORVU2Hr1G030610	-0.557269	0.832948
	HORVU2Hr1G068150	-0.504357	0.832948
	HORVU3Hr1G026010	0.563699	0.832948
	HORVU5Hr1G080540	-0.554426	0.832948
	HORVU5Hr1G112580	0.523219	0.832948
	HORVU7Hr1G028910	0.480927	0.832948
	HORVU7Hr1G038220	0.551104	0.832948
	HORVU4Hr1G085970	-0.50371	0.832948
	HORVU1Hr1G072750	-0.488542	0.832948
	HORVU1Hr1G006940	-0.630465	0.83329
	HORVU3Hr1G113640	-0.531624	0.83395
	HORVU2Hr1G043920	0.53733	0.835177
	HORVU2Hr1G094290	-0.438072	0.835177
	HORVU3Hr1G001030	0.629301	0.835177
	HORVU3Hr1G017420	-0.574715	0.835177
	HORVU3Hr1G054250	-0.546711	0.835177
	HORVU3Hr1G056200	-0.544878	0.835177
	HORVU3Hr1G079540	0.496694	0.835177
	HORVU3Hr1G085280	-0.451716	0.835177
	HORVU5Hr1G080690	0.399423	0.835177
	HORVU5Hr1G112790	-0.50376	0.835177
	HORVU7Hr1G028880	-0.627417	0.835177
	HORVU7Hr1G053780	-0.617689	0.835177
	HORVU7Hr1G115460	0.517143	0.835177
	HORVU4Hr1G057020	0.456428	0.835177
	HORVU4Hr1G061880	-0.605469	0.835177
	HORVU4Hr1G074810	-0.407304	0.835177
	HORVU6Hr1G047770	-0.628865	0.835177
	HORVU6Hr1G089600	-0.612684	0.835177
	HORVU1Hr1G002670	-0.597155	0.835177
	HORVU1Hr1G049310	-0.627938	0.835177
	HORVU1Hr1G055710	0.582905	0.835177
	HORVU0Hr1G020750	0.557102	0.835177
	HORVU2Hr1G043900	0.445449	0.835862
	HORVU2Hr1G047410	0.492873	0.835862
	HORVU2Hr1G060680	-0.494128	0.835862
	HORVU3Hr1G053540	-0.624102	0.835862
	HORVU3Hr1G090050	0.561351	0.835862
	HORVU3Hr1G116710	0.547526	0.835862
	HORVU3Hr1G117730	0.471381	0.835862
	HORVU5Hr1G081820	0.613014	0.835862
	HORVU7Hr1G024570	0.477104	0.835862
	HORVU7Hr1G029330	-0.448698	0.835862
	HORVU7Hr1G115370	0.625167	0.835862
	HORVU4Hr1G013640	0.493884	0.835862
	HORVU4Hr1G052640	0.509936	0.835862
	HORVU6Hr1G029640	0.516781	0.835862
	HORVU6Hr1G072940	0.491631	0.835862
	HORVU1Hr1G029850	-0.551818	0.835862
	HORVU1Hr1G069560	0.409389	0.835862
	HORVU1Hr1G087870	-0.579646	0.835862
	HORVU7Hr1G082450	-0.625447	0.836024
	HORVU2Hr1G076510	-0.471471	0.836961
	HORVU2Hr1G087070	0.612887	0.836961
	HORVU3Hr1G039980	0.462365	0.836961
	HORVU5Hr1G036630	0.498978	0.836961
	HORVU5Hr1G121730	-0.626971	0.836961
	HORVU4Hr1G023510	0.55015	0.836961
	HORVU4Hr1G066670	-0.618114	0.836961
	HORVU4Hr1G077850	-0.469667	0.836961
	HORVU4Hr1G079880	-0.624799	0.836961
	HORVU6Hr1G052600	0.482607	0.836961
	HORVU6Hr1G056280	0.387866	0.836961
	HORVU6Hr1G070550	-0.532361	0.836961
	HORVU6Hr1G084300	-0.609804	0.836961
	HORVU0Hr1G002410	0.602628	0.836961
	HORVU0Hr1G013240	0.610193	0.836961
	HORVU4Hr1G029030	0.435871	0.837711
	HORVU3Hr1G064080	0.558484	0.83885
	HORVU5Hr1G111010	0.41812	0.839048
	HORVU3Hr1G053770	-0.470401	0.839049
	HORVU5Hr1G092960	-0.515438	0.839963
	HORVU7Hr1G001190	0.416763	0.839963
	HORVU7Hr1G090410	0.545777	0.839963
	HORVU6Hr1G072390	0.614696	0.839963
	ENSRNA049488655	0.542947	0.840107
	HORVU6Hr1G011970	-0.606609	0.840196
	HORVU6Hr1G070540	-0.578039	0.840272
	HORVU1Hr1G090130	0.621189	0.840272
	HORVU0Hr1G016310	0.481549	0.840272
	HORVU3Hr1G033550	0.539645	0.840816
	HORVU3Hr1G107930	-0.577643	0.840816
	HORVU5Hr1G084160	0.558872	0.840816
	HORVU5Hr1G103330	0.429061	0.840816
	HORVU7Hr1G086520	0.458256	0.840816
	HORVU4Hr1G003090	0.411838	0.840816
	HORVU4Hr1G051740	0.51267	0.840816
	HORVU6Hr1G006880	0.519759	0.840816
	HORVU1Hr1G057570	0.457273	0.840816
	HORVU1Hr1G071440	-0.603309	0.840816
	HORVU2Hr1G085880	0.508841	0.84202
	HORVU2Hr1G092430	-0.462901	0.84202
	HORVU5Hr1G040370	-0.567589	0.84202
	HORVU5Hr1G092560	-0.374444	0.84202
	HORVU5Hr1G116720	0.621882	0.84202
	HORVU7Hr1G036500	0.565614	0.84202
	HORVU7Hr1G118090	0.489995	0.84202
	HORVU1Hr1G026480	-0.621856	0.84202
	HORVU2Hr1G088480	0.489088	0.84261
	HORVU5Hr1G081260	0.621109	0.84298
	HORVU1Hr1G050730	0.440246	0.84298
	HORVU7Hr1G081250	-0.525226	0.843988
	HORVU3Hr1G111740	0.45007	0.844614
	HORVU1Hr1G049270	-0.510997	0.844614
	HORVU5Hr1G096560	-0.620411	0.84469
	HORVU5Hr1G072640	-0.549404	0.845214
	HORVU5Hr1G079470	-0.485975	0.845214
	HORVU3Hr1G010290	0.422104	0.845817
	HORVU1Hr1G088870	-0.50544	0.845817
	HORVU2Hr1G092930	-0.465079	0.847206
	HORVU3Hr1G077070	0.608837	0.847206
	HORVU6Hr1G077930	-0.607232	0.847206
	HORVU5Hr1G028290	0.461564	0.84839
	HORVU1Hr1G015490	-0.558408	0.84839
	HORVU3Hr1G081640	0.559636	0.848595
	HORVU5Hr1G124960	0.41127	0.848595
	HORVU6Hr1G028680	-0.437157	0.848595
	HORVU3Hr1G007060	-0.617045	0.848976
	HORVU3Hr1G036870	0.563927	0.851741
	HORVU7Hr1G093710	-0.597819	0.852095
	HORVU1Hr1G043250	0.476751	0.852936
	HORVU1Hr1G074330	-0.597122	0.852936
	HORVU2Hr1G100970	0.479216	0.853022
	HORVU4Hr1G084810	0.392474	0.853022
	HORVU3Hr1G024200	-0.447141	0.854533
	HORVU3Hr1G077210	-0.609049	0.854533
	HORVU1Hr1G017240	0.532553	0.854533
	HORVU1Hr1G078350	0.443842	0.854533
	HORVU2Hr1G111920	-0.601723	0.854664
	HORVU5Hr1G053010	0.517089	0.855553
	HORVU7Hr1G046320	-0.479351	0.85709
	HORVU7Hr1G046820	-0.610886	0.85709
	HORVU4Hr1G063880	-0.483823	0.85709
	HORVU1Hr1G081320	0.556303	0.857697
	HORVU1Hr1G089620	0.580663	0.857697
	HORVU2Hr1G114720	-0.512153	0.857812
	HORVU5Hr1G084450	-0.542483	0.857812
	HORVU3Hr1G016360	-0.555654	0.858898
	HORVU5Hr1G027810	-0.453591	0.858898
	HORVU7Hr1G074490	0.538071	0.858898
	HORVU1Hr1G079240	-0.472234	0.858898
	HORVU7Hr1G053570	-0.423074	0.859155
	HORVU7Hr1G061640	0.56661	0.859155
	HORVU5Hr1G125600	0.552953	0.859269
	HORVU2Hr1G082540	-0.432768	0.859769
	HORVU3Hr1G065500	-0.543525	0.861939
	HORVU1Hr1G059090	0.417615	0.861939
	HORVU2Hr1G014140	0.557927	0.862802
	HORVU2Hr1G085830	-0.502337	0.862802
	HORVU5Hr1G074820	-0.576971	0.862802
	HORVU5Hr1G096940	0.492561	0.862802
	HORVU5Hr1G109220	0.450511	0.862802
	HORVU5Hr1G109420	0.474221	0.862802
	HORVU7Hr1G037510	0.535567	0.862802
	HORVU1Hr1G039090	-0.530673	0.862802
	HORVU1Hr1G077240	0.510738	0.862802
	HORVU0Hr1G008620	-0.524337	0.862802
	HORVU2Hr1G110420	0.607609	0.864278
	HORVU7Hr1G050080	-0.514004	0.864278
	HORVU3Hr1G074880	-0.609336	0.864326
	HORVU3Hr1G093380	0.590342	0.864326
	HORVU3Hr1G073100	-0.556657	0.865065
	HORVU4Hr1G015000	-0.485577	0.865065
	HORVU1Hr1G079590	-0.609829	0.865065
	HORVU7Hr1G008820	0.405609	0.865327
	HORVU7Hr1G088580	0.410631	0.868006
	ENSRNA049485478	0.573446	0.868006
	HORVU2Hr1G044250	0.60879	0.868246
	HORVU3Hr1G083090	0.429141	0.868246
	HORVU1Hr1G042690	-0.577307	0.868246
	HORVU1Hr1G071620	-0.375608	0.868246
	HORVU2Hr1G013210	0.469802	0.868303
	HORVU2Hr1G021060	-0.498435	0.868303
	HORVU2Hr1G102660	0.608473	0.868303
	HORVU2Hr1G110540	-0.608435	0.868303
	HORVU3Hr1G065510	-0.559069	0.868303
	HORVU5Hr1G049020	-0.35313	0.868303
	HORVU5Hr1G100700	0.461271	0.868303
	HORVU7Hr1G076070	-0.429834	0.868303
	HORVU7Hr1G102840	-0.43581	0.868303
	HORVU7Hr1G106960	-0.522978	0.868303
	HORVU4Hr1G074260	0.602019	0.868303
	HORVU6Hr1G084290	0.581354	0.868303
	HORVU1Hr1G023660	0.458147	0.868303
	HORVU1Hr1G087630	-0.500356	0.868303
	HORVU2Hr1G028780	0.529732	0.868857
	HORVU2Hr1G080340	0.506725	0.868857
	HORVU2Hr1G118900	-0.43907	0.868857
	HORVU3Hr1G004810	0.601105	0.868857
	HORVU3Hr1G037350	0.512633	0.868857
	HORVU3Hr1G039010	-0.573938	0.868857
	HORVU3Hr1G072260	-0.487341	0.868857
	HORVU3Hr1G081590	-0.480148	0.868857
	HORVU3Hr1G094220	-0.41779	0.868857
	HORVU3Hr1G095090	-0.493577	0.868857
	HORVU5Hr1G046250	-0.417297	0.868857
	HORVU5Hr1G067790	-0.471554	0.868857
	HORVU5Hr1G103360	-0.526259	0.868857
	HORVU7Hr1G008430	0.578641	0.868857
	HORVU7Hr1G048570	0.550825	0.868857
	HORVU7Hr1G053230	-0.536308	0.868857
	HORVU7Hr1G115780	0.479138	0.868857
	HORVU4Hr1G050710	0.48438	0.868857
	HORVU4Hr1G059000	0.468888	0.868857
	HORVU4Hr1G061740	0.395277	0.868857
	HORVU4Hr1G067600	0.498445	0.868857
	HORVU4Hr1G072010	0.430112	0.868857
	HORVU4Hr1G087400	0.605281	0.868857
	HORVU4Hr1G090110	0.421819	0.868857
	HORVU6Hr1G053000	-0.554436	0.868857
	HORVU6Hr1G067660	-0.403833	0.868857
	HORVU6Hr1G083120	0.442443	0.868857
	HORVU6Hr1G093680	0.58437	0.868857
	HORVU1Hr1G024400	0.399651	0.868857
	HORVU1Hr1G073500	-0.433221	0.868857
	HORVU4Hr1G071630	0.602888	0.869135
	HORVU7Hr1G051370	-0.465456	0.869343
	HORVU7Hr1G080210	-0.557816	0.869343
	HORVU5Hr1G070010	-0.401955	0.869537
	HORVU2Hr1G018300	-0.593764	0.870041
	HORVU2Hr1G019280	-0.594248	0.870041
	HORVU2Hr1G038940	-0.570646	0.870041
	HORVU2Hr1G056750	0.503487	0.870041
	HORVU2Hr1G073410	-0.504748	0.870041
	HORVU2Hr1G087490	-0.599875	0.870041
	HORVU2Hr1G091270	-0.512317	0.870041
	HORVU2Hr1G109380	-0.463216	0.870041
	HORVU3Hr1G027970	-0.49559	0.870041
	HORVU3Hr1G062150	0.466253	0.870041
	HORVU3Hr1G080040	-0.571413	0.870041
	HORVU3Hr1G082070	-0.439931	0.870041
	HORVU3Hr1G098400	0.413559	0.870041
	HORVU5Hr1G043140	0.377918	0.870041
	HORVU5Hr1G045020	-0.512823	0.870041
	HORVU5Hr1G052760	-0.590453	0.870041
	HORVU5Hr1G056870	0.495312	0.870041
	HORVU5Hr1G065650	-0.476269	0.870041
	HORVU7Hr1G008800	0.528097	0.870041
	HORVU7Hr1G033620	0.601639	0.870041
	HORVU7Hr1G036920	-0.559026	0.870041
	HORVU7Hr1G056700	0.334322	0.870041
	HORVU7Hr1G073720	0.498629	0.870041
	HORVU7Hr1G075790	0.445577	0.870041
	HORVU7Hr1G077930	-0.487918	0.870041
	HORVU7Hr1G093940	0.343554	0.870041
	HORVU7Hr1G101590	0.391282	0.870041
	HORVU7Hr1G110660	0.412718	0.870041
	HORVU4Hr1G044610	0.574013	0.870041
	HORVU4Hr1G080810	-0.488774	0.870041
	HORVU6Hr1G027760	0.552453	0.870041
	HORVU6Hr1G060080	0.558964	0.870041
	HORVU6Hr1G083990	0.591951	0.870041
	HORVU6Hr1G093520	0.597513	0.870041
	HORVU1Hr1G021840	0.413161	0.870041
	HORVU1Hr1G080040	-0.591045	0.870041
	HORVU1Hr1G095100	0.497101	0.870041
	HORVU3Hr1G071340	0.545711	0.870992
	HORVU2Hr1G094780	0.470848	0.871636
	HORVU5Hr1G037440	0.430339	0.871636
	HORVU4Hr1G061770	0.59872	0.871636
	HORVU6Hr1G091660	-0.595715	0.871636
	HORVU5Hr1G030330	0.388714	0.871645
	HORVU5Hr1G080300	-0.395862	0.872177
	HORVU2Hr1G022350	0.554858	0.872948
	HORVU2Hr1G062280	0.543716	0.872948
	HORVU3Hr1G069200	-0.462602	0.872948
	HORVU3Hr1G117390	-0.544903	0.872948
	HORVU4Hr1G068380	-0.596913	0.872948
	HORVU6Hr1G030080	0.43822	0.872948
	HORVU6Hr1G052140	-0.495057	0.872948
	HORVU1Hr1G089280	0.442438	0.872948
	HORVU2Hr1G077460	0.527629	0.87363
	HORVU2Hr1G032360	0.494575	0.875288
	HORVU7Hr1G044210	-0.530066	0.875288
	HORVU4Hr1G023050	-0.589993	0.875288
	HORVU4Hr1G069210	0.344927	0.875288
	HORVU1Hr1G075570	0.57527	0.875288
	HORVU1Hr1G077420	-0.597685	0.875288
	HORVU1Hr1G079910	0.444996	0.875288
	HORVU1Hr1G029480	0.411471	0.875965
	HORVU2Hr1G011510	-0.548836	0.876262
	HORVU2Hr1G076790	0.398373	0.876262
	HORVU2Hr1G084170	0.452229	0.876262
	HORVU2Hr1G108370	0.578675	0.876262
	HORVU2Hr1G109370	0.458105	0.876262
	HORVU2Hr1G110180	-0.536919	0.876262
	HORVU2Hr1G116190	0.393693	0.876262
	HORVU2Hr1G123760	-0.58524	0.876262
	HORVU3Hr1G031850	-0.458284	0.876262
	HORVU3Hr1G087570	0.571583	0.876262
	HORVU3Hr1G095240	-0.404003	0.876262
	HORVU5Hr1G086620	0.592058	0.876262
	HORVU7Hr1G057280	0.513787	0.876262
	HORVU4Hr1G006020	0.465473	0.876262
	HORVU4Hr1G008210	0.467629	0.876262
	HORVU4Hr1G058360	0.460106	0.876262
	HORVU4Hr1G065180	0.4419	0.876262
	HORVU4Hr1G069100	-0.536771	0.876262
	HORVU6Hr1G003160	-0.539733	0.876262
	HORVU6Hr1G055960	-0.444707	0.876262
	HORVU1Hr1G067480	-0.445163	0.876262
	HORVU1Hr1G075150	-0.460519	0.876262
	HORVU0Hr1G018000	0.466249	0.876262
	HORVU5Hr1G063360	-0.511027	0.876587
	HORVU4Hr1G002540	0.498959	0.876587
	HORVU6Hr1G018520	-0.38685	0.876587
	HORVU1Hr1G093780	-0.522796	0.876587
	HORVU7Hr1G069090	0.412266	0.877412
	HORVU0Hr1G033070	0.58297	0.877412
	HORVU7Hr1G040860	0.578303	0.878067
	HORVU2Hr1G029900	-0.334153	0.878357
	HORVU2Hr1G081190	0.456523	0.878357
	HORVU5Hr1G105900	0.573672	0.878357
	HORVU4Hr1G004440	0.439154	0.878357
	HORVU1Hr1G065100	-0.588298	0.878357
	HORVU0Hr1G027620	-0.490085	0.878357
	HORVU2Hr1G111480	0.460444	0.87879
	HORVU3Hr1G105880	0.326565	0.87879
	HORVU5Hr1G100180	-0.587949	0.87879
	HORVU5Hr1G104800	0.523924	0.87879
	HORVU4Hr1G035810	0.576759	0.87879
	HORVU6Hr1G091690	0.444363	0.87879
	HORVU0Hr1G016430	-0.440005	0.87879
	HORVU2Hr1G000580	0.455208	0.878807
	HORVU4Hr1G030640	-0.535327	0.878807
	HORVU6Hr1G020210	0.567168	0.878807
	HORVU6Hr1G053310	0.441597	0.878807
	HORVU4Hr1G070630	0.460968	0.878883
	HORVU6Hr1G091860	0.533193	0.878883
	HORVU4Hr1G072620	0.429996	0.879717
	HORVU3Hr1G079180	-0.56576	0.880265
	HORVU5Hr1G020300	-0.463323	0.880265
	HORVU7Hr1G020300	-0.587477	0.880265
	HORVU1Hr1G022900	-0.586549	0.881033
	HORVU3Hr1G038200	-0.496493	0.881912
	HORVU7Hr1G052270	-0.46256	0.882699
	HORVU1Hr1G062900	0.425918	0.882699
	HORVU1Hr1G043440	0.436968	0.883038
	HORVU7Hr1G116220	0.567005	0.885971
	HORVU5Hr1G081720	-0.589677	0.886033
	HORVU5Hr1G113550	0.455884	0.886033
	HORVU7Hr1G045580	-0.589206	0.887074
	HORVU6Hr1G056850	0.588104	0.887074
	HORVU0Hr1G012050	-0.574599	0.887078
	HORVU0Hr1G019610	-0.559532	0.887078
	HORVU3Hr1G071220	0.441058	0.888509
	HORVU1Hr1G055480	0.431672	0.889267
	HORVU2Hr1G108460	-0.50763	0.889682
	HORVU3Hr1G017100	0.538342	0.889682
	HORVU2Hr1G012380	-0.583511	0.89162
	HORVU2Hr1G075950	0.580215	0.89162
	HORVU2Hr1G086170	-0.573858	0.89162
	HORVU3Hr1G033410	-0.562016	0.89162
	HORVU3Hr1G046280	-0.470895	0.89162
	HORVU5Hr1G003820	-0.414219	0.89162
	HORVU5Hr1G040870	0.359581	0.89162
	HORVU5Hr1G093640	-0.418255	0.89162
	HORVU4Hr1G063190	0.489633	0.89162
	HORVU4Hr1G065990	-0.561137	0.89162
	HORVU4Hr1G050210	-0.51268	0.891841
	HORVU2Hr1G037140	-0.500752	0.891848
	HORVU2Hr1G094160	0.547677	0.891848
	HORVU3Hr1G000350	-0.547885	0.891848
	HORVU7Hr1G017790	-0.580567	0.891848
	HORVU2Hr1G020760	-0.557839	0.892031
	HORVU2Hr1G023350	-0.348816	0.892031
	HORVU2Hr1G000130	-0.564665	0.893238
	HORVU2Hr1G080970	0.394032	0.893238
	HORVU3Hr1G023390	-0.482008	0.893238
	HORVU5Hr1G086320	-0.567402	0.893238
	HORVU6Hr1G050140	-0.512491	0.893238
	HORVU6Hr1G090250	-0.381269	0.893238
	HORVU2Hr1G101610	0.483629	0.893279
	HORVU3Hr1G029370	0.583869	0.89391
	HORVU3Hr1G083560	-0.395069	0.89391
	HORVU5Hr1G045930	-0.371153	0.89391
	HORVU5Hr1G066810	-0.48241	0.89391
	HORVU5Hr1G079930	-0.582259	0.89391
	HORVU5Hr1G123530	-0.501063	0.89391
	HORVU6Hr1G036060	0.577805	0.89391
	HORVU6Hr1G038390	-0.575134	0.89391
	HORVU5Hr1G039100	-0.505681	0.894351
	HORVU7Hr1G073770	0.54161	0.894351
	HORVU1Hr1G026920	-0.575722	0.894351
	HORVU2Hr1G030690	-0.58392	0.894627
	HORVU2Hr1G122620	0.583403	0.894627
	HORVU3Hr1G063450	-0.473603	0.894627
	HORVU3Hr1G079900	-0.510896	0.894627
	HORVU3Hr1G117580	-0.466598	0.894627
	HORVU5Hr1G020530	-0.576428	0.894627
	HORVU5Hr1G096390	-0.501187	0.894627
	HORVU7Hr1G056430	-0.497118	0.894627
	HORVU7Hr1G096560	0.557785	0.894627
	HORVU4Hr1G015890	-0.524176	0.894627
	HORVU4Hr1G024570	0.366919	0.894627
	HORVU4Hr1G054580	0.39287	0.894627
	HORVU4Hr1G062570	0.498459	0.894627
	HORVU6Hr1G050810	-0.582223	0.894627
	HORVU6Hr1G070510	-0.450023	0.894627
	HORVU6Hr1G071950	0.570457	0.894627
	HORVU1Hr1G064780	0.457486	0.894627
	HORVU1Hr1G068870	0.339893	0.894627
[truncated: 14,689 more rows]

## Sheet: Leaf H2O2+LaCl3 unique
	Gene-ID	Log2FC	FDR
DEGs (FDR<0.01)	HORVU5Hr1G065420	4.06153	1.0334e-29
	HORVU2Hr1G032100	3.46661	2.91635e-19
	HORVU2Hr1G116830	3.46303	7.61665e-25
	HORVU6Hr1G003300	3.28847	3.30371e-28
	HORVU7Hr1G010300	2.50062	1.4678e-07
	HORVU5Hr1G067490	2.45521	2.01792e-39
	HORVU2Hr1G031400	2.44346	9.91572e-11
	HORVU7Hr1G084940	2.42224	3.88589e-24
	HORVU6Hr1G082360	2.37769	7.25908e-22
	HORVU4Hr1G005810	2.28323	6.08078e-07
	HORVU4Hr1G089490	2.27324	9.58237e-10
	HORVU5Hr1G074010	2.21037	2.77437e-07
	HORVU7Hr1G098580	2.19858	0.000179812
	HORVU4Hr1G083170	2.17998	7.21248e-05
	HORVU7Hr1G085130	2.16892	7.43469e-27
	HORVU5Hr1G098360	2.13297	1.78308e-12
	HORVU2Hr1G108790	2.12108	7.33601e-05
	HORVU0Hr1G022030	2.08437	5.59579e-08
	HORVU7Hr1G088670	2.07024	0.000124479
	HORVU3Hr1G016320	2.0559	2.45676e-19
	HORVU5Hr1G103990	2.00657	1.70681e-06
	HORVU7Hr1G114950	2.00075	1.57669e-05
	HORVU2Hr1G066080	1.9924	3.21682e-15
	HORVU7Hr1G094210	1.99118	2.07726e-05
	HORVU6Hr1G074660	1.98397	0.000107217
	HORVU4Hr1G090660	1.97039	1.18979e-06
	HORVU6Hr1G030550	1.9701	0.0011569
	HORVU2Hr1G105010	1.96542	5.11821e-20
	HORVU4Hr1G087980	1.95475	1.19827e-05
	HORVU5Hr1G110940	1.95244	0.00129949
	HORVU2Hr1G083490	1.92514	3.223e-11
	HORVU7Hr1G050030	1.91952	8.87264e-05
	HORVU2Hr1G067750	1.91473	8.61602e-07
	HORVU5Hr1G060370	1.90373	0.000644391
	HORVU2Hr1G106040	1.90049	1.12515e-13
	HORVU0Hr1G002870	1.89974	1.3887e-05
	HORVU1Hr1G083340	1.89242	0.00204569
	ENSRNA049482856	1.87449	0.00204569
	ENSRNA049489014	1.83132	0.00216748
	HORVU2Hr1G042370	1.8226	4.6462e-08
	HORVU7Hr1G093050	1.81603	5.81339e-10
	HORVU2Hr1G005220	1.81548	1.23441e-08
	HORVU7Hr1G051730	1.80689	6.633e-06
	HORVU7Hr1G029260	1.80472	5.06669e-09
	HORVU4Hr1G063640	1.79444	1.09108e-11
	HORVU2Hr1G017080	1.77535	7.88009e-08
	HORVU7Hr1G035320	1.77168	2.61107e-14
	HORVU3Hr1G087480	1.77037	0.00025013
	HORVU7Hr1G018600	1.76999	0.000303082
	HORVU4Hr1G002360	1.7641	1.02892e-10
	HORVU2Hr1G084640	1.74662	3.60452e-10
	HORVU2Hr1G005170	1.74662	0.00451253
	HORVU4Hr1G071040	1.7359	5.95576e-06
	HORVU5Hr1G063440	1.73139	0.00276323
	HORVU6Hr1G004000	1.72773	1.47571e-11
	HORVU4Hr1G060720	1.72711	5.53477e-07
	HORVU5Hr1G097930	1.72661	3.75988e-13
	HORVU4Hr1G013210	1.72388	2.11286e-07
	HORVU5Hr1G021750	1.71745	0.00246563
	HORVU1Hr1G014200	1.71181	3.47041e-06
	HORVU3Hr1G013630	1.69797	0.000381915
	HORVU3Hr1G030360	1.68612	6.21856e-06
	HORVU2Hr1G081890	1.67897	0.00834115
	HORVU2Hr1G032780	1.67676	2.27825e-07
	HORVU7Hr1G000260	1.67451	9.48345e-07
	HORVU0Hr1G001430	1.67173	0.000219561
	HORVU3Hr1G020490	1.66483	2.93437e-07
	HORVU4Hr1G017030	1.6583	1.18533e-18
	HORVU3Hr1G024400	1.65103	0.00103082
	HORVU1Hr1G052290	1.64975	3.38563e-09
	HORVU2Hr1G115960	1.6394	7.95157e-07
	HORVU4Hr1G065920	1.63214	4.36207e-17
	ENSRNA049488567	1.6316	0.00417863
	HORVU0Hr1G002720	1.62269	3.89327e-07
	HORVU4Hr1G072310	1.62242	1.35468e-06
	HORVU7Hr1G008430	1.61678	0.00113401
	HORVU3Hr1G026970	1.61628	3.62891e-06
	HORVU5Hr1G084050	1.61294	0.00898788
	HORVU7Hr1G121210	1.61175	3.08603e-07
	HORVU4Hr1G066740	1.60299	4.54718e-07
	HORVU4Hr1G069260	1.59677	0.0062873
	HORVU1Hr1G077560	1.5914	0.00426603
	HORVU1Hr1G094490	1.58861	5.22186e-10
	HORVU5Hr1G065330	1.58573	3.97196e-05
	HORVU2Hr1G116780	1.58431	0.00206284
	HORVU6Hr1G086790	1.58281	0.000278234
	HORVU2Hr1G078510	1.58234	7.95111e-10
	HORVU1Hr1G073940	1.58172	2.87907e-07
	HORVU3Hr1G087670	1.5605	0.0039886
	HORVU1Hr1G047430	1.55862	7.48671e-06
	HORVU3Hr1G038050	1.5585	0.000411636
	HORVU7Hr1G057330	1.5496	2.54527e-08
	HORVU1Hr1G055420	1.54297	3.53785e-10
	HORVU2Hr1G116700	1.53572	5.99257e-08
	HORVU2Hr1G094360	1.53555	0.000535897
	HORVU5Hr1G053700	1.5347	0.00279019
	HORVU0Hr1G040430	1.5198	3.73224e-08
	HORVU2Hr1G108780	1.51655	1.56367e-07
	HORVU3Hr1G055980	1.5061	0.00380986
	HORVU7Hr1G108490	1.50372	0.00825125
	HORVU4Hr1G090440	1.50066	2.21225e-05
	HORVU3Hr1G063310	1.49575	0.00265309
	HORVU7Hr1G049370	1.49514	9.11519e-13
	HORVU7Hr1G078760	1.49466	0.00181038
	HORVU4Hr1G063190	1.49462	1.3616e-06
	HORVU4Hr1G027970	1.49015	0.000132672
	HORVU3Hr1G071120	1.48836	0.000770076
	HORVU7Hr1G057410	1.48578	1.99231e-07
	HORVU5Hr1G071720	1.48555	2.14785e-08
	HORVU1Hr1G004230	1.48082	3.63643e-14
	HORVU5Hr1G096090	1.47943	0.00129926
	HORVU1Hr1G084690	1.47788	0.00176258
	HORVU0Hr1G020420	1.47513	0.00129949
	HORVU2Hr1G027370	1.47359	0.000838058
	HORVU2Hr1G087010	1.47237	1.22681e-12
	HORVU1Hr1G087070	1.47019	3.6025e-09
	HORVU2Hr1G111610	1.46605	0.000313991
	HORVU4Hr1G047240	1.4658	4.59669e-10
	HORVU2Hr1G116800	1.46313	7.68942e-05
	HORVU4Hr1G010540	1.46013	7.33601e-05
	HORVU5Hr1G063320	1.45617	0.00149814
	HORVU4Hr1G071000	1.45603	0.00890829
	HORVU6Hr1G077710	1.45051	2.70962e-05
	HORVU7Hr1G096560	1.44972	9.50565e-05
	HORVU2Hr1G118050	1.44838	0.000586025
	HORVU6Hr1G063020	1.43916	2.8402e-05
	HORVU3Hr1G083740	1.43605	2.45616e-08
	HORVU2Hr1G096910	1.42865	7.05699e-06
	HORVU1Hr1G079130	1.42524	0.00137262
	HORVU5Hr1G047000	1.42286	1.3836e-10
	HORVU3Hr1G058100	1.41402	2.58026e-06
	HORVU7Hr1G035500	1.41343	9.85286e-08
	HORVU1Hr1G063450	1.4129	0.00546708
	HORVU4Hr1G077360	1.41004	0.000195087
	HORVU1Hr1G079730	1.40477	2.57904e-07
	HORVU2Hr1G113260	1.39867	2.95495e-05
	HORVU3Hr1G083520	1.39702	0.00686333
	HORVU2Hr1G093670	1.39337	5.01381e-11
	HORVU3Hr1G019580	1.39179	0.000305274
	HORVU2Hr1G037470	1.38422	5.18237e-06
	HORVU4Hr1G076040	1.37934	0.000112203
	HORVU4Hr1G067450	1.37631	1.97561e-05
	HORVU7Hr1G050530	1.376	8.22171e-08
	HORVU7Hr1G046050	1.36876	0.00684057
	HORVU5Hr1G080820	1.36291	0.000338658
	HORVU7Hr1G115370	1.35723	0.006242
	HORVU7Hr1G099380	1.35576	0.00159745
	HORVU5Hr1G068110	1.34692	0.000750191
	HORVU6Hr1G028190	1.34544	0.0087338
	HORVU2Hr1G088030	1.34174	0.000544348
	HORVU6Hr1G029750	1.33975	2.9885e-06
	HORVU1Hr1G065030	1.33905	8.2203e-07
	HORVU7Hr1G117550	1.3348	0.00890829
	HORVU2Hr1G027400	1.32536	0.00241685
	HORVU3Hr1G067860	1.31999	7.82419e-10
	HORVU2Hr1G098160	1.31843	2.91436e-05
	HORVU0Hr1G006830	1.31821	0.00702162
	HORVU7Hr1G030660	1.31537	0.000967407
	HORVU3Hr1G021190	1.31336	4.48856e-08
	HORVU1Hr1G053440	1.31334	2.48374e-08
	HORVU1Hr1G076080	1.3069	0.00834115
	HORVU6Hr1G009850	1.30614	3.61499e-05
	HORVU4Hr1G051400	1.30572	3.58711e-05
	HORVU4Hr1G072340	1.30567	0.00975291
	HORVU2Hr1G117140	1.3044	0.00180333
	HORVU3Hr1G027220	1.29597	6.03308e-07
	HORVU7Hr1G001040	1.29287	5.48831e-07
	HORVU6Hr1G084080	1.28918	0.00108032
	HORVU7Hr1G101580	1.28839	1.32273e-10
	HORVU2Hr1G022780	1.28752	1.81226e-06
	HORVU6Hr1G080750	1.28516	3.74565e-07
	HORVU7Hr1G008390	1.28497	8.41821e-05
	HORVU2Hr1G105800	1.28445	0.000402298
	HORVU2Hr1G041080	1.28033	6.30861e-07
	HORVU1Hr1G037760	1.27769	7.17807e-05
	HORVU2Hr1G108420	1.27439	0.0011569
	HORVU4Hr1G059390	1.27032	1.17043e-07
	HORVU3Hr1G083500	1.26848	0.000669272
	HORVU1Hr1G054260	1.267	0.00027565
	HORVU7Hr1G077750	1.2657	4.88694e-10
	HORVU2Hr1G106210	1.26448	0.00246563
	HORVU6Hr1G002390	1.26234	0.00114284
	HORVU3Hr1G036860	1.26056	2.50809e-08
	HORVU5Hr1G103680	1.26032	1.32273e-10
	HORVU7Hr1G050710	1.25333	0.00172996
	HORVU1Hr1G079280	1.2526	0.000531455
	HORVU7Hr1G010240	1.25188	7.75034e-05
	HORVU7Hr1G043090	1.25	0.00198905
	HORVU6Hr1G025830	1.24844	1.78709e-09
	HORVU7Hr1G101920	1.24256	0.000286728
	HORVU7Hr1G109140	1.24133	0.000132882
	HORVU5Hr1G113240	1.23737	9.63763e-06
	HORVU3Hr1G065620	1.2361	0.00190318
	HORVU5Hr1G065370	1.23607	8.07009e-09
	HORVU3Hr1G029200	1.23573	3.29584e-06
	HORVU5Hr1G064650	1.22369	0.00112805
	HORVU7Hr1G012300	1.22151	7.51219e-07
	HORVU1Hr1G055470	1.22034	0.00188266
	HORVU2Hr1G011610	1.21883	0.00559243
	HORVU3Hr1G001360	1.21771	0.00893713
	HORVU1Hr1G083960	1.21695	0.000646859
	HORVU4Hr1G067940	1.21662	0.00568199
	HORVU4Hr1G009990	1.21623	0.000370078
	HORVU6Hr1G004010	1.21246	0.000506566
	HORVU4Hr1G000910	1.20902	0.00566762
	HORVU2Hr1G041110	1.20633	2.89413e-06
	HORVU3Hr1G011560	1.20349	0.00252107
	HORVU5Hr1G112280	1.20333	2.91436e-05
	HORVU6Hr1G036760	1.20102	0.00468101
	HORVU3Hr1G089290	1.20004	0.000967407
	HORVU7Hr1G001420	1.19857	0.00548497
	HORVU3Hr1G045900	1.18817	0.00759811
	HORVU3Hr1G072730	1.18808	0.0017635
	HORVU6Hr1G033450	1.18807	0.00674699
	HORVU4Hr1G053130	1.1813	0.00108381
	HORVU3Hr1G058610	1.18031	0.00333133
	HORVU2Hr1G110120	1.17986	0.000580106
	HORVU1Hr1G055140	1.17891	0.00352684
	HORVU6Hr1G021160	1.17282	0.00253083
	HORVU7Hr1G012280	1.1706	0.00708454
	HORVU3Hr1G115610	1.16976	0.000150634
	HORVU2Hr1G091910	1.16873	1.62634e-06
	HORVU1Hr1G017660	1.16294	6.43955e-07
	HORVU5Hr1G002320	1.15853	0.00893248
	HORVU6Hr1G072640	1.15587	0.00987482
	HORVU4Hr1G081990	1.15124	0.000683453
	HORVU7Hr1G080990	1.14771	7.29369e-08
	HORVU5Hr1G066760	1.14761	0.00417863
	HORVU4Hr1G076490	1.13882	0.00423937
	HORVU5Hr1G084700	1.13796	3.96945e-05
	HORVU7Hr1G038220	1.13219	0.00859401
	HORVU3Hr1G075150	1.12706	0.000267723
	HORVU6Hr1G072030	1.12637	0.00996537
	HORVU2Hr1G105100	1.12456	8.10014e-06
	HORVU0Hr1G040490	1.12429	0.00618194
	HORVU0Hr1G022580	1.12291	0.00801023
	HORVU2Hr1G095320	1.12169	0.00836139
	HORVU3Hr1G081400	1.11878	1.76216e-05
	HORVU6Hr1G034620	1.11865	0.00216748
	HORVU2Hr1G085880	1.11612	0.00161551
	HORVU2Hr1G061850	1.10315	0.00327649
	HORVU3Hr1G071800	1.10275	0.000559067
	HORVU1Hr1G038680	1.10026	4.60074e-05
	HORVU7Hr1G038510	1.09831	0.00199504
	HORVU6Hr1G075420	1.09375	5.51231e-05
	HORVU7Hr1G040030	1.09165	1.02674e-07
	HORVU2Hr1G039710	1.0907	1.79142e-05
	HORVU4Hr1G060280	1.09066	5.18951e-05
	HORVU6Hr1G057680	1.08163	0.000138447
	HORVU5Hr1G103770	1.08035	0.00124484
	HORVU4Hr1G079310	1.07933	0.0014524
	HORVU5Hr1G067530	1.07469	9.65111e-06
	HORVU1Hr1G025940	1.07468	4.09588e-06
	HORVU7Hr1G093080	1.07258	0.00101112
	HORVU1Hr1G064210	1.0685	0.00483739
	HORVU3Hr1G071220	1.0671	0.000712973
	HORVU2Hr1G093960	1.06435	0.00362442
	HORVU5Hr1G096940	1.06427	1.56367e-07
	HORVU4Hr1G037680	1.05658	0.00344819
	HORVU5Hr1G041530	1.05478	0.000809154
	HORVU5Hr1G032980	1.05463	2.38955e-05
	HORVU6Hr1G015480	1.04984	0.000793791
	HORVU3Hr1G082210	1.04518	0.000975259
	HORVU4Hr1G059860	1.04383	0.00473017
	HORVU1Hr1G054240	1.03745	0.000658501
	HORVU2Hr1G039100	1.03628	0.00554676
	HORVU2Hr1G085690	1.03589	0.00897245
	HORVU1Hr1G070290	1.03231	0.00426603
	HORVU2Hr1G010830	1.03074	0.00253348
	HORVU7Hr1G030690	1.02616	2.08749e-07
	HORVU5Hr1G046480	1.02517	9.90346e-06
	HORVU1Hr1G068910	1.02396	0.000386013
	HORVU1Hr1G040420	1.02288	0.000134945
	HORVU5Hr1G071140	1.02257	0.00253964
	HORVU4Hr1G077280	1.02162	0.00412374
	HORVU7Hr1G087420	1.02144	0.000193464
	HORVU4Hr1G072620	1.0181	0.00174873
	HORVU3Hr1G000720	1.0171	0.00472361
	HORVU2Hr1G039070	1.01691	3.47041e-06
	HORVU2Hr1G081190	1.01621	0.00446998
	HORVU6Hr1G068490	1.0145	0.00995141
	HORVU3Hr1G022020	1.00963	0.00181038
	HORVU5Hr1G115280	1.00706	0.00844505
	HORVU5Hr1G072620	1.00404	0.00292098
	HORVU1Hr1G038620	1.0032	0.0010224
	HORVU5Hr1G000980	1.00316	0.00214737
	HORVU5Hr1G023800	-1.00024	0.00258108
	HORVU4Hr1G013460	-1.00062	0.00920121
	HORVU4Hr1G016810	-1.00314	0.000226252
	HORVU5Hr1G058270	-1.00365	0.000266545
	HORVU3Hr1G086210	-1.00413	0.000926997
	HORVU0Hr1G017160	-1.0055	0.00284037
	HORVU7Hr1G100810	-1.00584	1.70681e-06
	HORVU7Hr1G035030	-1.00705	0.00111342
	HORVU1Hr1G047390	-1.00766	0.00656227
	HORVU1Hr1G005260	-1.01138	0.000848975
	HORVU3Hr1G088500	-1.01275	3.39025e-05
	HORVU7Hr1G076840	-1.01353	0.00111551
	HORVU3Hr1G048520	-1.01548	0.000171733
	HORVU1Hr1G063310	-1.01818	0.000131491
	HORVU2Hr1G101770	-1.01871	0.000428978
	HORVU7Hr1G044210	-1.01917	0.00328339
	HORVU3Hr1G008420	-1.02051	1.90391e-07
	HORVU5Hr1G086500	-1.0236	0.000512187
	HORVU2Hr1G020220	-1.02456	0.000261085
	HORVU5Hr1G028030	-1.02592	0.00918986
	HORVU5Hr1G075430	-1.0273	0.00765082
	HORVU5Hr1G106350	-1.02859	0.00893248
	HORVU4Hr1G086660	-1.02981	1.80986e-05
	HORVU7Hr1G118010	-1.03158	0.00457517
	HORVU2Hr1G111600	-1.03662	0.00471702
	HORVU6Hr1G064620	-1.03691	1.68283e-06
	HORVU2Hr1G012440	-1.03692	0.000447385
	HORVU5Hr1G011730	-1.03748	0.00955855
	HORVU4Hr1G077310	-1.03771	1.66793e-05
	HORVU2Hr1G125950	-1.0391	3.13717e-05
	HORVU5Hr1G098720	-1.04169	1.06655e-06
	HORVU7Hr1G085450	-1.04394	0.000132882
	HORVU6Hr1G053550	-1.04598	8.99511e-07
	HORVU4Hr1G088910	-1.04622	0.00989426
	HORVU3Hr1G098360	-1.04697	0.000238971
	HORVU5Hr1G099070	-1.05007	0.00154014
	HORVU6Hr1G060150	-1.05151	0.00560969
	HORVU5Hr1G052230	-1.05601	0.00155279
	HORVU5Hr1G116920	-1.05961	5.44724e-06
	HORVU2Hr1G107480	-1.06201	1.97179e-07
	HORVU1Hr1G049210	-1.06377	0.00558992
	HORVU0Hr1G005300	-1.06545	0.000241259
	HORVU1Hr1G028200	-1.06545	0.000556207
	HORVU2Hr1G094090	-1.06927	0.00706309
	HORVU2Hr1G069440	-1.07227	0.00324864
	HORVU4Hr1G089030	-1.07253	0.00975291
	HORVU3Hr1G049640	-1.07548	2.52216e-05
	HORVU4Hr1G014270	-1.0805	2.64992e-05
	HORVU6Hr1G028220	-1.08114	0.000244312
	HORVU7Hr1G085790	-1.08146	0.00197847
	HORVU7Hr1G045330	-1.08307	6.45436e-05
	HORVU1Hr1G023510	-1.08499	0.000803364
	HORVU6Hr1G078110	-1.08829	0.000262484
	HORVU5Hr1G093640	-1.09139	4.82793e-06
	HORVU3Hr1G052980	-1.09261	0.00309197
	HORVU3Hr1G085520	-1.09357	3.86984e-05
	HORVU1Hr1G049270	-1.09389	0.00188715
	HORVU5Hr1G045020	-1.09391	0.00277762
	HORVU5Hr1G011980	-1.09713	0.00212524
	HORVU3Hr1G083560	-1.09847	8.44363e-06
	HORVU5Hr1G028550	-1.09856	0.0020835
	HORVU2Hr1G123480	-1.10144	0.00388911
	HORVU4Hr1G062330	-1.10375	0.00120695
	HORVU5Hr1G040970	-1.10679	2.36599e-06
	HORVU4Hr1G065110	-1.10859	0.00925753
	HORVU4Hr1G014900	-1.11103	0.000658501
	HORVU3Hr1G082460	-1.11382	0.00839338
	HORVU5Hr1G072650	-1.11661	0.00879843
	HORVU7Hr1G040790	-1.11694	8.99511e-07
	HORVU3Hr1G030150	-1.12201	1.04379e-08
	HORVU7Hr1G091740	-1.12317	2.4693e-05
	HORVU6Hr1G070510	-1.12326	2.72005e-06
	HORVU1Hr1G092670	-1.12528	0.000900606
	HORVU2Hr1G079960	-1.12772	7.33601e-05
	HORVU2Hr1G121310	-1.131	0.00041737
	HORVU1Hr1G014730	-1.13171	1.94448e-05
	HORVU2Hr1G013420	-1.13403	0.00378864
	HORVU2Hr1G099550	-1.13754	6.77239e-07
	HORVU7Hr1G040590	-1.13815	0.000573737
	EPlHVUG00000039840	-1.13907	0.00425605
	EPlHVUG00000039816	-1.14382	0.00304656
	HORVU3Hr1G026500	-1.14615	8.87264e-05
	HORVU6Hr1G055960	-1.15298	4.44653e-05
	HORVU7Hr1G117640	-1.1566	3.39025e-05
	HORVU7Hr1G082990	-1.15769	0.00679564
	HORVU2Hr1G015830	-1.15914	0.00438173
	HORVU6Hr1G077010	-1.16288	0.000669272
	HORVU4Hr1G016730	-1.16383	0.000112227
	HORVU0Hr1G019640	-1.16385	0.00313104
	HORVU3Hr1G022370	-1.1647	0.000386013
	HORVU5Hr1G119810	-1.16542	0.000437692
	HORVU3Hr1G108170	-1.16773	7.92599e-07
	HORVU3Hr1G074940	-1.17086	0.00139474
	HORVU4Hr1G000310	-1.17358	0.000577128
	HORVU3Hr1G028280	-1.17415	0.00744106
	HORVU5Hr1G012240	-1.17626	6.68184e-07
	HORVU7Hr1G050770	-1.17897	6.78578e-05
	HORVU2Hr1G028540	-1.1803	0.0089948
	HORVU3Hr1G086030	-1.18188	0.000747093
	HORVU1Hr1G011990	-1.18204	6.00803e-06
	HORVU7Hr1G122470	-1.18212	9.42255e-07
	HORVU4Hr1G076690	-1.18862	0.0010269
	HORVU7Hr1G029720	-1.19035	7.33601e-05
	HORVU5Hr1G086520	-1.19169	0.00569509
	HORVU3Hr1G117840	-1.19247	0.00241685
	HORVU4Hr1G060000	-1.19268	5.72528e-05
	HORVU5Hr1G059430	-1.19956	5.3716e-08
	HORVU6Hr1G089350	-1.20015	0.00181189
	HORVU3Hr1G115540	-1.20462	0.00187263
	HORVU5Hr1G018480	-1.20606	5.72528e-05
	HORVU5Hr1G080540	-1.20703	0.000540753
	HORVU5Hr1G109290	-1.21247	0.00277696
	HORVU3Hr1G117440	-1.21632	8.0802e-07
	HORVU3Hr1G091230	-1.21791	8.10014e-06
	HORVU2Hr1G022540	-1.2201	0.00979838
	HORVU3Hr1G003860	-1.22026	0.000876407
	HORVU3Hr1G007290	-1.22172	0.000848123
	HORVU4Hr1G054370	-1.2233	1.19827e-05
	HORVU1Hr1G074350	-1.2239	2.99167e-05
	HORVU4Hr1G072300	-1.22395	4.15703e-06
	HORVU6Hr1G039940	-1.22438	7.35445e-06
	HORVU5Hr1G063810	-1.22916	0.000148849
	HORVU3Hr1G069880	-1.22999	0.000203075
	HORVU4Hr1G073480	-1.24274	5.52182e-07
	HORVU2Hr1G089020	-1.24315	0.00890829
	HORVU4Hr1G057740	-1.24365	0.00425605
	HORVU5Hr1G106520	-1.24877	0.000382383
	HORVU2Hr1G033610	-1.24999	0.00536859
	HORVU1Hr1G074510	-1.25288	0.000218726
	HORVU6Hr1G042080	-1.25416	0.0016056
	HORVU1Hr1G049070	-1.25557	0.00340841
	HORVU4Hr1G001450	-1.25969	0.000344076
	HORVU5Hr1G042030	-1.26316	0.00577631
	HORVU1Hr1G068950	-1.26365	0.000101608
	HORVU4Hr1G080810	-1.26444	1.06655e-06
	HORVU3Hr1G020100	-1.27037	3.60099e-06
	HORVU2Hr1G065100	-1.27188	1.78858e-06
	HORVU6Hr1G012640	-1.27343	0.00134929
	HORVU1Hr1G004330	-1.28129	1.10017e-07
	HORVU5Hr1G124380	-1.28299	3.22149e-09
	HORVU6Hr1G077750	-1.28613	4.70781e-07
	HORVU4Hr1G068420	-1.29051	0.002171
	HORVU1Hr1G023220	-1.29273	1.02674e-07
	HORVU6Hr1G018770	-1.29421	6.02212e-05
	HORVU4Hr1G056210	-1.29513	0.000339833
	HORVU2Hr1G091280	-1.29746	4.87479e-05
	HORVU2Hr1G076970	-1.29896	1.43893e-06
	HORVU7Hr1G050140	-1.30076	0.00710314
	HORVU6Hr1G079700	-1.30155	0.0016827
	HORVU3Hr1G000120	-1.30264	9.1415e-06
	HORVU7Hr1G003090	-1.30548	5.66209e-05
	HORVU1Hr1G094180	-1.30838	0.00537792
	HORVU7Hr1G087250	-1.31041	0.00337467
	HORVU4Hr1G052140	-1.31115	0.00240686
	HORVU7Hr1G033230	-1.31554	3.51725e-08
	HORVU1Hr1G079450	-1.31694	2.84361e-06
	HORVU0Hr1G002410	-1.32115	0.000149126
	HORVU7Hr1G047790	-1.32485	0.000102664
	HORVU3Hr1G092020	-1.32653	1.15376e-05
	HORVU5Hr1G049160	-1.32653	6.5285e-07
	HORVU7Hr1G106480	-1.32727	0.00757222
	HORVU7Hr1G091080	-1.32729	0.00993957
	HORVU1Hr1G071460	-1.33498	0.00586838
	HORVU4Hr1G084840	-1.33714	0.00428535
	HORVU5Hr1G102900	-1.33878	4.957e-07
	HORVU6Hr1G073520	-1.34668	5.71084e-07
	HORVU3Hr1G014590	-1.35135	0.000206594
	HORVU1Hr1G066090	-1.3568	1.17043e-07
	HORVU7Hr1G081250	-1.35792	6.38095e-05
	HORVU5Hr1G018240	-1.35807	8.61602e-07
	HORVU6Hr1G073730	-1.35908	2.24999e-12
	HORVU7Hr1G040720	-1.35981	0.00411949
	HORVU5Hr1G104050	-1.36028	0.00337467
	HORVU7Hr1G055900	-1.3608	0.000635694
	HORVU7Hr1G027810	-1.36127	0.000793791
	HORVU5Hr1G060070	-1.36175	0.000328111
	HORVU6Hr1G037000	-1.36377	1.09887e-09
	HORVU7Hr1G098260	-1.36874	1.15648e-05
	HORVU6Hr1G016710	-1.37865	1.07946e-08
	HORVU7Hr1G036070	-1.37873	0.00020095
	HORVU7Hr1G091180	-1.38242	0.00352684
	HORVU4Hr1G020710	-1.38397	2.25093e-07
	HORVU4Hr1G087840	-1.38624	0.00021359
	HORVU4Hr1G089520	-1.38627	0.00691702
	HORVU7Hr1G076790	-1.38713	1.2338e-08
	HORVU5Hr1G124450	-1.3892	2.55077e-05
	HORVU2Hr1G013940	-1.39044	1.41926e-07
	HORVU1Hr1G085480	-1.39204	0.00204569
	HORVU2Hr1G006690	-1.39212	9.03297e-05
	HORVU2Hr1G120200	-1.39559	0.00473017
	HORVU7Hr1G051150	-1.39623	7.95111e-10
	HORVU1Hr1G029520	-1.39641	0.000133612
	HORVU4Hr1G015040	-1.40127	0.00362442
	HORVU5Hr1G025710	-1.4027	0.00138491
	HORVU2Hr1G115890	-1.4061	2.55969e-06
	HORVU2Hr1G093210	-1.40858	1.42703e-06
	HORVU3Hr1G067130	-1.42341	2.62873e-07
	HORVU5Hr1G093040	-1.4249	0.00149077
	HORVU3Hr1G093350	-1.42777	8.32131e-07
	HORVU3Hr1G064680	-1.43051	2.07726e-05
	HORVU5Hr1G020510	-1.43061	1.84326e-09
	HORVU1Hr1G056210	-1.43157	0.006721
	HORVU1Hr1G005680	-1.4316	0.000180452
	HORVU6Hr1G089460	-1.43877	0.00426603
	HORVU3Hr1G000350	-1.4391	1.4369e-05
	HORVU7Hr1G020880	-1.44764	0.00204569
	HORVU3Hr1G080770	-1.44957	0.000464568
	HORVU4Hr1G018230	-1.45036	0.000365539
	HORVU4Hr1G043530	-1.45594	1.75922e-06
	HORVU2Hr1G094780	-1.45646	1.29544e-06
	HORVU1Hr1G007480	-1.45877	1.79142e-05
	HORVU7Hr1G087490	-1.45896	2.1487e-06
	HORVU4Hr1G054480	-1.46139	1.67184e-14
	HORVU7Hr1G028880	-1.46789	0.00328511
	HORVU0Hr1G017570	-1.46873	0.00266825
	HORVU3Hr1G068410	-1.47068	0.00440849
	HORVU1Hr1G093760	-1.47993	0.00897753
	HORVU1Hr1G071180	-1.48999	0.000138447
	HORVU7Hr1G091350	-1.49055	0.000373247
	HORVU3Hr1G114970	-1.49184	0.00059331
	HORVU5Hr1G059410	-1.49311	0.000858249
	HORVU7Hr1G098370	-1.49599	9.47878e-12
	HORVU1Hr1G080040	-1.51197	9.8927e-05
	HORVU1Hr1G038880	-1.51263	0.00306552
	HORVU3Hr1G016890	-1.51427	0.00659622
	HORVU3Hr1G007280	-1.51746	5.4194e-12
	HORVU7Hr1G054710	-1.51836	2.59649e-05
	HORVU5Hr1G092960	-1.51986	3.4878e-06
	HORVU2Hr1G073210	-1.52085	1.44112e-05
	HORVU1Hr1G092640	-1.52492	0.0017635
	HORVU2Hr1G068010	-1.52694	0.00086219
	HORVU4Hr1G082600	-1.54065	1.73721e-12
	HORVU5Hr1G019030	-1.54436	6.96227e-19
	HORVU5Hr1G123540	-1.54528	4.87013e-06
	HORVU2Hr1G122580	-1.54683	0.00162628
	HORVU0Hr1G012860	-1.54698	3.71237e-06
	HORVU7Hr1G073370	-1.54892	6.76084e-05
	HORVU4Hr1G055220	-1.55145	1.35809e-08
	HORVU2Hr1G104150	-1.55256	0.00442351
	HORVU5Hr1G073800	-1.55331	4.6462e-08
	HORVU4Hr1G024290	-1.55491	3.99839e-05
	HORVU5Hr1G006360	-1.55561	0.000256083
	HORVU1Hr1G063780	-1.55648	0.00676738
	HORVU2Hr1G088110	-1.56166	1.37929e-06
	HORVU7Hr1G115410	-1.56283	0.000199482
	HORVU2Hr1G018570	-1.56693	0.000495044
	HORVU1Hr1G040720	-1.57156	2.3279e-15
	HORVU5Hr1G013990	-1.57402	1.7708e-08
	HORVU6Hr1G081160	-1.57499	4.80463e-07
	HORVU5Hr1G080430	-1.58118	0.00440319
	HORVU2Hr1G123730	-1.5828	0.00018575
	HORVU5Hr1G084900	-1.58951	7.37207e-10
	HORVU2Hr1G026820	-1.58985	6.44957e-10
	HORVU6Hr1G067470	-1.59087	0.00648561
	HORVU7Hr1G098490	-1.6016	0.000862203
	HORVU3Hr1G078620	-1.60335	0.0014815
	HORVU5Hr1G069510	-1.61379	1.05679e-05
	HORVU2Hr1G032710	-1.61405	8.41277e-06
	HORVU0Hr1G007340	-1.61591	0.00345756
	HORVU4Hr1G078400	-1.61947	2.04196e-06
	HORVU6Hr1G088580	-1.62097	4.44099e-12
	HORVU2Hr1G034270	-1.62138	9.14509e-10
	HORVU1Hr1G074330	-1.62352	0.00751584
	HORVU1Hr1G082250	-1.62362	2.09926e-16
	HORVU3Hr1G108330	-1.62605	2.06397e-05
	HORVU2Hr1G090750	-1.62945	0.000815119
	HORVU2Hr1G002320	-1.63259	4.19241e-06
	HORVU2Hr1G015980	-1.63806	0.0010224
	HORVU2Hr1G121060	-1.64073	1.03889e-10
	HORVU4Hr1G070610	-1.64076	0.00581963
	HORVU7Hr1G020760	-1.6423	0.00739474
	HORVU5Hr1G067200	-1.64771	0.000727737
	HORVU7Hr1G113300	-1.65315	0.00834115
	HORVU2Hr1G080460	-1.65707	2.53499e-06
	HORVU4Hr1G075090	-1.65912	1.78308e-12
	HORVU7Hr1G097000	-1.66039	0.00577631
	HORVU6Hr1G055000	-1.66205	0.000727737
	HORVU0Hr1G022690	-1.66404	9.31e-10
	HORVU3Hr1G097770	-1.67005	0.000459422
	HORVU5Hr1G110090	-1.67029	0.00897753
	HORVU6Hr1G008640	-1.6739	1.62062e-13
	HORVU7Hr1G017790	-1.68984	3.45929e-08
	HORVU2Hr1G078960	-1.69003	3.57461e-05
	HORVU5Hr1G077920	-1.69004	2.86775e-08
	HORVU2Hr1G091270	-1.69169	7.92477e-12
	HORVU5Hr1G119520	-1.69334	0.00429611
	HORVU3Hr1G097810	-1.69546	0.000231272
	HORVU7Hr1G096690	-1.69773	3.42394e-05
	HORVU4Hr1G013180	-1.6986	0.00253083
	HORVU1Hr1G059020	-1.70096	0.000633713
	HORVU4Hr1G057000	-1.70121	1.12683e-15
	HORVU6Hr1G089980	-1.7029	1.47571e-11
	HORVU7Hr1G116310	-1.70537	6.82768e-06
	HORVU3Hr1G059130	-1.70732	0.00516411
	HORVU1Hr1G046680	-1.71349	5.95325e-08
	HORVU2Hr1G036060	-1.7135	0.00327649
	HORVU1Hr1G043890	-1.71717	0.00666839
	HORVU4Hr1G009070	-1.71778	5.95576e-06
	HORVU4Hr1G021000	-1.72763	6.41048e-09
	HORVU6Hr1G029910	-1.73178	5.42628e-05
	HORVU3Hr1G115990	-1.73414	1.41876e-13
	HORVU1Hr1G073460	-1.73739	3.58566e-06
	HORVU7Hr1G035440	-1.73886	0.000267015
	HORVU2Hr1G098140	-1.73955	0.00512413
	HORVU2Hr1G107100	-1.74091	5.36275e-08
	HORVU7Hr1G032360	-1.75189	5.03358e-05
	HORVU7Hr1G024190	-1.75593	0.000273102
	HORVU5Hr1G115250	-1.7561	9.55166e-06
	HORVU5Hr1G093770	-1.75779	4.84135e-06
	HORVU4Hr1G078350	-1.76081	4.83296e-06
	HORVU5Hr1G012740	-1.7647	0.00159641
	HORVU7Hr1G038860	-1.76563	7.70714e-10
	HORVU2Hr1G088760	-1.76567	5.66209e-05
	HORVU5Hr1G069880	-1.76688	0.00429611
	HORVU3Hr1G087770	-1.77748	0.00449756
	HORVU1Hr1G021180	-1.77804	0.00447732
	HORVU1Hr1G092290	-1.78759	0.00404263
	HORVU5Hr1G087760	-1.7933	0.00273092
	HORVU4Hr1G078950	-1.7962	8.71599e-07
	HORVU1Hr1G039220	-1.80094	0.000277558
	HORVU6Hr1G027640	-1.80226	3.40647e-07
	HORVU4Hr1G006850	-1.80986	1.59725e-15
	HORVU6Hr1G091840	-1.82218	3.03936e-08
	HORVU2Hr1G024740	-1.82442	2.6158e-05
	HORVU2Hr1G099470	-1.83513	4.16212e-16
	HORVU2Hr1G118520	-1.8353	0.00134497
	HORVU4Hr1G072960	-1.83543	8.36318e-12
	HORVU3Hr1G108680	-1.8427	0.00249964
	HORVU1Hr1G049420	-1.84777	1.20042e-05
	HORVU6Hr1G081400	-1.84846	5.12825e-10
	HORVU3Hr1G010190	-1.85317	0.000504922
	HORVU2Hr1G110230	-1.86338	6.35884e-05
	HORVU6Hr1G060610	-1.8649	2.22745e-06
	HORVU3Hr1G096910	-1.86539	4.22564e-06
	HORVU4Hr1G021650	-1.86631	9.17533e-06
	HORVU4Hr1G028720	-1.86681	8.99511e-07
	HORVU2Hr1G007130	-1.86882	0.000184032
	HORVU3Hr1G116060	-1.87197	1.23685e-20
	HORVU2Hr1G018440	-1.87789	1.78858e-06
	HORVU4Hr1G013170	-1.89516	1.59048e-18
	HORVU6Hr1G028150	-1.9037	3.61499e-05
	HORVU4Hr1G089560	-1.91318	0.00145171
	HORVU6Hr1G009500	-1.92029	0.00165076
	HORVU5Hr1G047150	-1.9545	1.15648e-05
	HORVU2Hr1G095460	-1.95644	0.00129926
	HORVU5Hr1G104580	-1.95738	7.68642e-10
	HORVU3Hr1G006450	-1.98663	1.13015e-09
	HORVU7Hr1G040690	-2.03784	1.08222e-08
	HORVU3Hr1G111600	-2.04782	7.85824e-13
	HORVU4Hr1G085120	-2.05046	3.71965e-05
	HORVU2Hr1G093950	-2.05273	8.58411e-09
	HORVU3Hr1G088120	-2.05294	1.77492e-09
	HORVU3Hr1G021150	-2.06571	3.21682e-15
	HORVU5Hr1G059280	-2.06686	3.18619e-05
	HORVU4Hr1G008610	-2.06891	7.82419e-10
	HORVU5Hr1G080860	-2.076	5.81511e-13
	HORVU6Hr1G035470	-2.08295	5.7295e-15
	HORVU4Hr1G083070	-2.09323	1.7504e-16
	HORVU2Hr1G114220	-2.09408	1.4678e-07
	HORVU5Hr1G073570	-2.10019	2.35419e-08
	HORVU7Hr1G044160	-2.10357	9.45861e-08
	HORVU1Hr1G070190	-2.12071	1.33748e-07
	HORVU1Hr1G049230	-2.12401	5.72087e-06
	HORVU7Hr1G109850	-2.12448	6.53423e-05
	HORVU3Hr1G035470	-2.13667	1.60438e-18
	HORVU7Hr1G084420	-2.14157	4.06405e-07
	HORVU6Hr1G065430	-2.16098	1.33748e-07
	HORVU3Hr1G084360	-2.16291	0.000173865
	HORVU5Hr1G087530	-2.21293	3.61167e-05
	HORVU2Hr1G105190	-2.21515	2.06219e-12
	HORVU4Hr1G039300	-2.2395	0.000101754
	HORVU6Hr1G060140	-2.24459	3.06925e-05
	HORVU4Hr1G073840	-2.28446	2.52424e-22
	HORVU6Hr1G058580	-2.28792	4.32573e-11
	HORVU3Hr1G095700	-2.30857	8.32279e-15
	HORVU1Hr1G092440	-2.31497	1.52235e-14
	HORVU4Hr1G085800	-2.31818	2.45616e-08
	HORVU3Hr1G022260	-2.32741	7.43469e-27
	HORVU4Hr1G085590	-2.34401	6.29014e-16
	HORVU5Hr1G093580	-2.35321	4.86846e-24
	HORVU2Hr1G023450	-2.38592	1.38533e-27
	HORVU1Hr1G065600	-2.45487	4.29017e-11
	HORVU3Hr1G064920	-2.53094	3.46779e-07
	HORVU7Hr1G072670	-2.5352	2.87539e-08
	HORVU2Hr1G082700	-2.53628	2.55848e-06
	HORVU3Hr1G068830	-2.54489	8.49851e-10
	HORVU4Hr1G085250	-2.54877	4.94797e-15
	HORVU7Hr1G088510	-2.58231	1.67222e-07
	HORVU7Hr1G019700	-2.68397	5.15041e-09
	HORVU5Hr1G080090	-2.82958	1.24383e-08
	HORVU5Hr1G073690	-2.89833	2.26549e-09
	HORVU5Hr1G086710	-2.89874	4.15608e-14
	HORVU2Hr1G108520	-2.92204	3.75953e-08
	HORVU4Hr1G077300	-2.93197	4.32752e-22
	HORVU2Hr1G046370	-2.93524	2.35879e-17
	HORVU1Hr1G072890	-2.94151	6.17214e-32
	HORVU2Hr1G077180	-2.96387	2.3611e-15
	HORVU5Hr1G119480	-2.96677	3.75988e-13
	HORVU5Hr1G011540	-3.01416	2.67102e-13
	HORVU7Hr1G034070	-3.12318	1.71561e-10
	HORVU2Hr1G104040	-3.18777	1.95745e-12
	HORVU2Hr1G121050	-3.28335	5.0905e-16
	HORVU5Hr1G080300	-3.36459	1.04533e-13
	HORVU6Hr1G027810	-3.39519	7.3442e-45
	HORVU4Hr1G080820	-3.53894	3.51034e-22
	HORVU5Hr1G014170	-3.68047	7.41892e-42
	HORVU2Hr1G007640	-3.68713	2.52432e-13
	HORVU3Hr1G093270	-3.88457	4.17797e-23
	HORVU5Hr1G080420	-3.88539	8.82241e-23
	HORVU3Hr1G117640	-4.0233	1.0755e-17
	HORVU2Hr1G005330	-4.14562	6.47288e-20
	HORVU3Hr1G117570	-4.20493	8.2041e-37
	HORVU5Hr1G084230	-4.44478	4.6131e-26
	HORVU1Hr1G075860	0.999306	0.00272097
	HORVU3Hr1G086220	0.997674	0.000251653
	HORVU7Hr1G095900	0.997188	0.00159745
	HORVU2Hr1G116060	0.996645	0.00133917
	HORVU2Hr1G100960	0.991651	0.00193363
	HORVU3Hr1G090410	0.984755	0.00362647
	HORVU5Hr1G088920	0.984075	0.00012579
	HORVU4Hr1G054420	0.978405	0.00169681
	HORVU5Hr1G124750	0.977848	0.0002041
	HORVU5Hr1G008730	0.975399	0.00258835
	HORVU2Hr1G034540	0.974706	0.000591515
	HORVU3Hr1G057200	0.967604	0.00161186
	HORVU5Hr1G065350	0.960317	1.58256e-06
	HORVU3Hr1G073190	0.960042	0.00238692
	HORVU0Hr1G012930	0.958617	0.00342808
	HORVU6Hr1G056610	0.957245	0.0070658
	HORVU7Hr1G096040	0.955337	0.00352684
	HORVU3Hr1G071830	0.955252	0.00402991
	HORVU1Hr1G020450	0.954187	0.000857563
	HORVU7Hr1G030210	0.9537	8.87092e-05
	HORVU7Hr1G115670	0.950967	0.000140562
	HORVU1Hr1G045220	0.945239	7.05602e-05
	HORVU5Hr1G014790	0.944976	0.00152113
	HORVU2Hr1G078570	0.943032	0.0071594
	HORVU2Hr1G109370	0.942322	0.00927675
	HORVU3Hr1G080830	0.942282	0.000584738
	HORVU3Hr1G061080	0.939704	0.00757222
	HORVU5Hr1G016780	0.937984	6.7978e-06
	HORVU5Hr1G097940	0.936062	4.72195e-06
	HORVU2Hr1G080100	0.935697	0.00516213
	HORVU0Hr1G022610	0.929806	0.00472213
	HORVU5Hr1G098780	0.926492	0.00169681
	HORVU3Hr1G093260	0.924122	0.000967407
	HORVU1Hr1G030790	0.922792	0.000150634
	HORVU6Hr1G073630	0.918229	0.000133837
	HORVU4Hr1G014970	0.917576	0.000142627
	HORVU7Hr1G117890	0.917057	0.00859469
	HORVU7Hr1G044070	0.916786	0.00972328
	HORVU2Hr1G125110	0.914536	0.00446132
	HORVU2Hr1G063840	0.914113	0.00337957
	HORVU7Hr1G045830	0.912809	0.00108913
	HORVU7Hr1G084830	0.911471	0.000444088
	HORVU2Hr1G070440	0.910914	0.00120695
	HORVU7Hr1G114890	0.90855	0.00954664
	HORVU2Hr1G092190	0.903109	0.00292949
	HORVU2Hr1G121030	0.90266	0.00893235
	HORVU6Hr1G019520	0.897191	0.00179105
	HORVU7Hr1G009230	0.894735	0.00161898
	HORVU5Hr1G114890	0.893556	0.0072389
	HORVU0Hr1G012230	0.893352	0.00807476
	HORVU2Hr1G045900	0.891875	0.000522124
	HORVU2Hr1G108840	0.887939	0.00361597
	HORVU5Hr1G021300	0.887046	0.00934403
	HORVU1Hr1G089430	0.886668	0.00917562
	HORVU5Hr1G024440	0.885093	0.00927675
	HORVU4Hr1G056770	0.882828	0.000245101
	HORVU2Hr1G098820	0.880981	0.0054325
	HORVU5Hr1G039430	0.875493	0.00454789
	HORVU4Hr1G084810	0.8752	0.000580794
	HORVU3Hr1G017630	0.873353	0.00429611
	HORVU2Hr1G116740	0.871844	0.00246563
	HORVU5Hr1G080060	0.870885	0.000328111
	HORVU7Hr1G009370	0.867281	0.00893235
	HORVU5Hr1G070800	0.866239	0.00108478
	HORVU5Hr1G006780	0.864165	0.00893248
	HORVU1Hr1G013970	0.855967	0.00154189
	HORVU5Hr1G116310	0.85462	0.0037569
	HORVU6Hr1G035420	0.852565	0.00289567
	HORVU6Hr1G011990	0.849289	0.00780833
	HORVU4Hr1G087740	0.84907	0.00359433
	HORVU5Hr1G050180	0.848569	0.00245967
	HORVU4Hr1G067280	0.848117	0.00505536
	HORVU5Hr1G112670	0.845111	0.00390052
	HORVU4Hr1G005900	0.844736	0.00718202
	HORVU1Hr1G078350	0.844329	0.000155613
	HORVU7Hr1G036390	0.84299	0.00216748
	HORVU1Hr1G078370	0.830818	0.00505536
	HORVU5Hr1G100790	0.828678	0.00258108
	HORVU2Hr1G102620	0.825366	0.00268095
	HORVU6Hr1G075010	0.824512	0.00975291
	HORVU5Hr1G062290	0.814456	0.00241685
	HORVU7Hr1G038160	0.810852	0.00822421
	HORVU3Hr1G090920	0.807353	3.97003e-05
	HORVU2Hr1G029600	0.804831	0.00172996
	HORVU5Hr1G056530	0.803044	0.00337467
	HORVU7Hr1G115600	0.801629	0.00604507
	HORVU3Hr1G098400	0.800324	0.00932949
	HORVU3Hr1G003470	0.798623	0.00836139
	HORVU5Hr1G111590	0.796786	9.22618e-05
	HORVU4Hr1G083820	0.7949	0.00181038
	HORVU7Hr1G098540	0.792729	0.00579243
	HORVU5Hr1G103430	0.79137	0.000544106
	HORVU3Hr1G013970	0.791131	0.00342656
	HORVU7Hr1G026680	0.787836	0.00419029
	HORVU2Hr1G123200	0.784406	0.00939096
	HORVU1Hr1G017050	0.784339	0.000184032
	HORVU5Hr1G108610	0.778728	0.00942418
	HORVU3Hr1G065770	0.777879	0.00169681
	HORVU0Hr1G008850	0.777558	0.00138565
	HORVU3Hr1G072860	0.777064	0.00541619
	HORVU2Hr1G039930	0.775449	0.00251561
	HORVU3Hr1G013690	0.774689	0.000442786
	HORVU4Hr1G014130	0.77222	0.00701765
	HORVU6Hr1G056280	0.771781	0.000843332
	HORVU4Hr1G075410	0.763659	4.68233e-05
	HORVU4Hr1G009380	0.761751	0.00142061
	HORVU2Hr1G033470	0.758702	0.00701765
	HORVU3Hr1G053300	0.758645	0.00644536
	HORVU2Hr1G017300	0.756482	0.0035956
	HORVU3Hr1G036600	0.753859	0.0011569
	HORVU5Hr1G014510	0.753605	0.00559243
	HORVU7Hr1G010690	0.751248	0.000776768
	HORVU2Hr1G025380	0.748215	0.00651532
	HORVU1Hr1G015000	0.745361	0.00315736
	HORVU1Hr1G062110	0.741304	0.000581583
	HORVU1Hr1G036920	0.734871	0.00859469
	HORVU5Hr1G070720	0.733853	0.000181977
	HORVU5Hr1G047980	0.732227	0.0038578
	HORVU5Hr1G100910	0.724624	0.00594331
	HORVU4Hr1G018650	0.722057	0.00882771
	HORVU6Hr1G063490	0.709884	0.00289419
	HORVU5Hr1G063390	0.709265	0.00925753
	HORVU7Hr1G050340	0.703252	0.00700376
	HORVU2Hr1G087390	0.700713	0.00362442
	HORVU6Hr1G035370	0.695595	0.00254802
	HORVU3Hr1G069520	0.686444	0.00897245
	HORVU2Hr1G021080	0.685224	0.0057691
	HORVU3Hr1G105880	0.680202	0.00254646
	HORVU4Hr1G008270	0.67961	0.00579992
	HORVU1Hr1G044680	0.675429	0.00916015
	HORVU7Hr1G079810	0.659564	0.00213646
	HORVU7Hr1G067060	0.653861	0.00284037
	HORVU5Hr1G072420	0.640427	0.00170256
	HORVU5Hr1G085070	0.63684	0.00648561
	HORVU3Hr1G052490	0.634273	0.00841358
	HORVU1Hr1G079380	0.625913	0.00860346
	HORVU2Hr1G023560	0.618889	0.00204228
	HORVU6Hr1G074940	0.608951	0.00689238
	HORVU6Hr1G012510	0.606106	0.00890829
	HORVU7Hr1G046320	-0.517979	0.00996829
	HORVU6Hr1G033160	-0.587757	0.00644536
	HORVU3Hr1G028540	-0.591083	0.00691988
	HORVU5Hr1G065170	-0.622822	0.00600595
	HORVU4Hr1G059250	-0.624987	0.00892217
	HORVU2Hr1G103010	-0.647255	0.00545107
	HORVU7Hr1G033030	-0.661607	0.00432523
	HORVU7Hr1G042390	-0.666225	0.00507362
	HORVU3Hr1G106850	-0.679374	0.00537792
	HORVU2Hr1G027640	-0.680736	0.00780833
	HORVU7Hr1G048470	-0.682601	0.00757222
	HORVU2Hr1G104030	-0.683284	0.00701765
	HORVU5Hr1G080580	-0.683971	0.00126424
	HORVU7Hr1G121700	-0.68528	0.00145171
	HORVU4Hr1G084920	-0.685377	0.00426603
	HORVU7Hr1G056770	-0.685518	0.00383186
	HORVU2Hr1G111640	-0.702397	0.00361597
	HORVU7Hr1G049250	-0.704322	0.00859469
	HORVU3Hr1G057860	-0.706444	0.0069361
	HORVU6Hr1G003470	-0.706552	0.00447732
	HORVU2Hr1G036510	-0.709874	0.00860346
	HORVU5Hr1G103440	-0.709998	0.00759648
	HORVU2Hr1G125280	-0.71625	0.00927675
	HORVU7Hr1G086890	-0.720592	0.00297996
	HORVU1Hr1G070230	-0.726951	0.00562114
	HORVU2Hr1G065330	-0.727	0.00198232
	HORVU3Hr1G100350	-0.730619	0.000584738
	HORVU3Hr1G073220	-0.730868	0.000508396
	HORVU2Hr1G045200	-0.732017	0.00812802
	HORVU3Hr1G013350	-0.737304	0.00313104
	HORVU3Hr1G010570	-0.742283	0.00518958
	HORVU7Hr1G032750	-0.747738	0.00564695
	HORVU2Hr1G005150	-0.749478	0.00897245
	HORVU0Hr1G000200	-0.751437	0.000597974
	HORVU2Hr1G060880	-0.753966	0.00934403
	HORVU1Hr1G071260	-0.754373	0.00227471
	HORVU4Hr1G075180	-0.758499	0.00159397
	HORVU4Hr1G016410	-0.762988	0.00292949
	HORVU2Hr1G066480	-0.763282	0.000941376
	HORVU4Hr1G059090	-0.767708	0.000226506
	HORVU2Hr1G040780	-0.77622	2.21225e-05
	HORVU7Hr1G085650	-0.776285	0.00456558
	HORVU7Hr1G111010	-0.781839	0.000559067
	HORVU6Hr1G051560	-0.782886	0.000837992
	HORVU7Hr1G088560	-0.783712	0.00674699
	HORVU2Hr1G019400	-0.784617	0.00148716
	HORVU0Hr1G012940	-0.787841	0.00975291
	HORVU2Hr1G114610	-0.789701	0.00579243
	HORVU7Hr1G088210	-0.796989	0.00870972
	HORVU1Hr1G038120	-0.798124	0.000967407
	HORVU5Hr1G005290	-0.798171	0.000757068
	HORVU5Hr1G098190	-0.801602	0.000132086
	HORVU6Hr1G091700	-0.802228	0.0087018
	HORVU2Hr1G020270	-0.803872	0.00046932
	HORVU4Hr1G066510	-0.807664	0.0081404
	HORVU3Hr1G053760	-0.811337	0.00451939
	HORVU4Hr1G075110	-0.813229	0.00275636
	HORVU3Hr1G014960	-0.813756	0.00460977
	HORVU3Hr1G106950	-0.81419	0.000330258
	HORVU6Hr1G091550	-0.814839	0.00163256
	HORVU6Hr1G058740	-0.815767	0.00333956
	HORVU1Hr1G085470	-0.819158	0.00981743
	HORVU1Hr1G073170	-0.821603	0.00214902
	HORVU3Hr1G098160	-0.826686	3.9229e-05
	HORVU7Hr1G041260	-0.826929	0.00442351
	HORVU2Hr1G094400	-0.82799	2.28014e-05
	HORVU1Hr1G004150	-0.83238	0.00417863
	HORVU7Hr1G058730	-0.83311	8.87264e-05
	HORVU4Hr1G019530	-0.834509	0.00175736
	HORVU7Hr1G046280	-0.836841	0.000710476
	HORVU2Hr1G124960	-0.836868	0.00933315
	HORVU0Hr1G013770	-0.842329	0.000757068
	HORVU5Hr1G078950	-0.844084	0.0054325
	HORVU7Hr1G078500	-0.849509	0.00149814
	HORVU4Hr1G050230	-0.855911	0.00979358
	HORVU4Hr1G016770	-0.857958	0.000480531
	HORVU7Hr1G092570	-0.863881	0.00547551
	HORVU3Hr1G074310	-0.868597	0.00945755
	HORVU1Hr1G093770	-0.869941	0.00576668
	HORVU2Hr1G080140	-0.872476	0.000566642
	HORVU3Hr1G082070	-0.872746	0.00737113
	HORVU3Hr1G074960	-0.873161	0.00486914
	HORVU3Hr1G005500	-0.873382	0.00026475
	HORVU5Hr1G006900	-0.873677	0.00254243
	HORVU2Hr1G099450	-0.881349	3.31751e-06
	HORVU4Hr1G000850	-0.8845	1.15376e-05
	HORVU2Hr1G113460	-0.886355	3.56708e-05
	HORVU6Hr1G089750	-0.886394	0.000236061
	HORVU6Hr1G038430	-0.886992	0.00316084
	HORVU3Hr1G055650	-0.888976	0.000304351
	HORVU7Hr1G093580	-0.890165	0.000197956
	HORVU5Hr1G099200	-0.890865	0.000343317
	HORVU7Hr1G052500	-0.89472	0.00897245
	HORVU3Hr1G051610	-0.897452	0.000747093
	HORVU6Hr1G059550	-0.897665	0.000180578
	HORVU2Hr1G118410	-0.897698	0.0002786
	HORVU3Hr1G095240	-0.901878	0.000338658
	HORVU3Hr1G096460	-0.908477	0.00545107
	HORVU1Hr1G029460	-0.909095	0.00192658
	HORVU3Hr1G088350	-0.911643	0.000566642
	HORVU7Hr1G051930	-0.912466	0.003258
	HORVU2Hr1G092820	-0.914604	0.00457855
	HORVU6Hr1G062260	-0.915889	0.00550688
	HORVU7Hr1G041300	-0.918102	0.0029557
	HORVU1Hr1G024240	-0.922305	0.0018997
	HORVU3Hr1G009980	-0.923623	0.000817619
	HORVU6Hr1G073990	-0.928102	0.000150634
	HORVU2Hr1G022600	-0.928266	0.0061414
	HORVU6Hr1G072810	-0.928403	2.51029e-05
	HORVU2Hr1G095720	-0.931798	0.00197617
	HORVU5Hr1G024550	-0.933993	0.00138557
	HORVU1Hr1G073280	-0.934369	5.77216e-05
	HORVU3Hr1G068970	-0.934393	0.000771297
	HORVU5Hr1G110180	-0.937826	0.000186028
	HORVU1Hr1G017700	-0.942849	0.00403478
	HORVU2Hr1G084910	-0.947069	0.00418855
	HORVU5Hr1G081090	-0.947731	0.000313991
	HORVU3Hr1G082690	-0.949893	1.57669e-05
	HORVU5Hr1G114850	-0.95105	0.00725763
	HORVU0Hr1G017530	-0.95365	0.000581127
	HORVU4Hr1G005110	-0.953956	0.000125319
	HORVU3Hr1G095400	-0.956539	7.08336e-05
	HORVU7Hr1G101740	-0.956727	7.11747e-05
	HORVU3Hr1G115000	-0.957332	0.00243969
	HORVU1Hr1G061090	-0.960061	0.00337224
	HORVU3Hr1G105300	-0.962925	0.00221422
	HORVU6Hr1G012400	-0.965736	0.00927675
	HORVU3Hr1G094210	-0.97044	0.000423101
	HORVU6Hr1G065230	-0.970999	0.00588369
	HORVU1Hr1G056280	-0.971179	0.00849508
	HORVU3Hr1G018820	-0.972582	9.25821e-07
	HORVU7Hr1G102840	-0.974486	0.00116093
	HORVU5Hr1G064020	-0.976536	0.00568832
	HORVU2Hr1G124870	-0.97715	0.00597472
	HORVU2Hr1G004230	-0.980417	0.00115872
	HORVU7Hr1G101270	-0.980663	0.00216605
	HORVU4Hr1G090820	-0.980969	5.41868e-06
	HORVU1Hr1G017970	-0.982526	0.000385945
	HORVU3Hr1G006140	-0.985684	0.00132505
	HORVU3Hr1G072260	-0.985715	0.00653343
	HORVU3Hr1G079410	-0.989674	0.00897753
	HORVU7Hr1G000370	-0.989791	0.000402859
	HORVU5Hr1G082990	-0.989971	0.00241685
	HORVU5Hr1G002090	-0.990347	0.00964551
	HORVU2Hr1G101980	-0.99201	0.00015663
	HORVU5Hr1G072520	-0.994068	0.00343108
	HORVU5Hr1G062720	-0.995985	9.35997e-07
	HORVU1Hr1G017460	-0.998499	0.00121728
	HORVU4Hr1G027660	-0.998727	7.0429e-07
	HORVU4Hr1G066070	-0.999446	0.00111551
	HORVU5Hr1G108670	-0.999599	0.00246563
UCs (FDR>0.01)	HORVU5Hr1G123970	1.0046	0.0100303
	HORVU6Hr1G021260	1.10679	0.0100786
	HORVU4Hr1G056640	1.3414	0.0101029
	HORVU1Hr1G009950	0.757334	0.0101251
	HORVU2Hr1G077650	1.26185	0.0103091
	HORVU1Hr1G052700	0.603273	0.0104084
	HORVU2Hr1G089970	1.01675	0.0104151
	HORVU2Hr1G017270	-1.2351	0.0104434
	HORVU6Hr1G084770	-0.769236	0.0104434
	HORVU3Hr1G092820	-1.37913	0.0104821
	HORVU7Hr1G056430	-0.984077	0.0105331
	HORVU3Hr1G109220	-1.04403	0.0105461
	HORVU1Hr1G074860	0.874754	0.0105529
	HORVU2Hr1G098390	-0.954597	0.0107126
	HORVU3Hr1G053350	-1.21296	0.0107374
	HORVU0Hr1G021280	-1.52491	0.0107471
	HORVU2Hr1G080370	0.908165	0.0108069
	HORVU4Hr1G064740	-1.32287	0.0109636
	HORVU5Hr1G037600	0.702405	0.0110428
	HORVU6Hr1G083440	1.16159	0.0110428
	HORVU1Hr1G073510	1.23308	0.0110988
	HORVU7Hr1G090240	-1.05663	0.0112248
	HORVU2Hr1G075810	-0.702167	0.0112259
	HORVU3Hr1G073230	0.761799	0.0112259
	HORVU1Hr1G053050	-0.871538	0.0112489
	HORVU7Hr1G042120	-0.741631	0.0112599
	HORVU2Hr1G112860	-0.71045	0.0113661
	HORVU3Hr1G085720	-0.979832	0.0113927
	HORVU4Hr1G089200	-1.29743	0.0114081
	HORVU5Hr1G023640	1.217	0.0114485
	HORVU7Hr1G083670	0.879412	0.0114932
	HORVU2Hr1G109430	0.747433	0.0115276
	HORVU5Hr1G111480	0.912115	0.0115276
	HORVU7Hr1G115540	-0.88828	0.0115276
	HORVU1Hr1G070270	-0.794224	0.0115814
	HORVU7Hr1G080310	0.796758	0.0116388
	HORVU2Hr1G073320	0.847803	0.0116516
	HORVU0Hr1G004700	0.762937	0.0116516
	HORVU6Hr1G033290	1.10864	0.0117787
	HORVU5Hr1G047420	-1.12894	0.0117919
	HORVU4Hr1G073580	-0.967635	0.0118051
	HORVU7Hr1G080440	-0.708087	0.0118548
	HORVU3Hr1G061010	-0.836573	0.0118604
	HORVU2Hr1G094320	0.87941	0.0118815
	HORVU7Hr1G087210	0.741381	0.0118832
	HORVU4Hr1G008180	-0.693714	0.0120174
	HORVU1Hr1G080820	1.61853	0.0120802
	HORVU5Hr1G014310	-0.791759	0.0120866
	HORVU1Hr1G095140	0.884034	0.012125
	HORVU5Hr1G096780	-0.931581	0.0121344
	HORVU5Hr1G095020	0.795231	0.0121363
	HORVU4Hr1G016010	-1.44876	0.0121363
	HORVU5Hr1G037290	0.801397	0.0122122
	HORVU5Hr1G118420	-1.60938	0.0122122
	HORVU2Hr1G022140	1.32589	0.0122738
	HORVU7Hr1G044150	-0.621339	0.0122738
	HORVU4Hr1G066860	-0.578734	0.0122997
	HORVU5Hr1G063570	1.09257	0.0123035
	HORVU3Hr1G058740	1.11585	0.0123216
	HORVU3Hr1G081270	0.882998	0.0123216
	HORVU2Hr1G076790	0.7612	0.0123224
	HORVU5Hr1G057460	0.886607	0.0123343
	HORVU7Hr1G119060	0.694748	0.0123471
	HORVU1Hr1G012140	-1.07576	0.0124136
	HORVU7Hr1G049960	-0.793778	0.0124267
	HORVU7Hr1G108960	-0.605308	0.0125179
	HORVU7Hr1G038270	0.991555	0.0125241
	HORVU6Hr1G036950	-0.651328	0.0125241
	HORVU7Hr1G056410	0.630378	0.0126131
	HORVU2Hr1G001620	1.57802	0.0126679
	HORVU4Hr1G085480	-1.56838	0.0126679
	HORVU4Hr1G088670	0.802071	0.0127311
	HORVU3Hr1G007420	0.777877	0.0128653
	HORVU4Hr1G073230	1.09907	0.0128653
	HORVU6Hr1G072660	1.54636	0.0128653
	HORVU0Hr1G022310	0.645688	0.0129636
	HORVU4Hr1G009270	-0.735068	0.0129884
	HORVU7Hr1G117320	1.06951	0.0130372
	HORVU4Hr1G042710	1.60548	0.0130372
	HORVU4Hr1G081940	-0.856024	0.0130389
	HORVU6Hr1G054850	-1.32371	0.0130389
	HORVU0Hr1G022020	-1.1479	0.0130389
	HORVU6Hr1G014650	-1.4045	0.0130589
	HORVU4Hr1G008580	-0.673492	0.0131298
	HORVU4Hr1G083360	0.636981	0.0131489
	HORVU6Hr1G077340	-0.600583	0.01316
	HORVU1Hr1G091400	0.790563	0.0132116
	HORVU7Hr1G098510	-0.6858	0.0132388
	HORVU2Hr1G113320	1.56129	0.0132894
	HORVU2Hr1G066100	1.13879	0.0133142
	HORVU2Hr1G037940	1.06116	0.0133523
	HORVU3Hr1G067750	0.658993	0.0133971
	HORVU2Hr1G077110	-0.969963	0.0134179
	HORVU1Hr1G026480	-1.42391	0.0134601
	HORVU3Hr1G094320	-1.37804	0.0135459
	HORVU2Hr1G023260	-1.20183	0.0136057
	HORVU2Hr1G112620	-1.31858	0.0136057
	HORVU6Hr1G007360	1.01788	0.0136057
	HORVU6Hr1G081890	0.867772	0.0136057
	HORVU1Hr1G051780	-1.44965	0.0136167
	HORVU4Hr1G064870	-1.37384	0.013618
	HORVU6Hr1G030390	0.805061	0.0136557
	HORVU5Hr1G109100	0.691626	0.0136949
	HORVU2Hr1G007990	1.53314	0.0137278
	HORVU2Hr1G028510	1.21398	0.0137278
	HORVU6Hr1G076130	0.869698	0.0137355
	HORVU5Hr1G021610	1.21929	0.0137401
	HORVU3Hr1G024210	-0.969726	0.0137877
	HORVU3Hr1G021810	0.929486	0.0138762
	HORVU4Hr1G074480	1.00412	0.0139413
	HORVU4Hr1G014480	-1.41749	0.014022
	HORVU2Hr1G039000	0.733537	0.0140912
	HORVU7Hr1G029950	-1.12134	0.0141281
	HORVU6Hr1G033380	-1.13391	0.014168
	HORVU5Hr1G084100	0.765072	0.0141846
	HORVU6Hr1G071950	0.965293	0.0142211
	HORVU4Hr1G026340	-0.850473	0.0142781
	HORVU1Hr1G070420	-1.48943	0.0142781
	HORVU5Hr1G111620	0.661801	0.014347
	HORVU7Hr1G053230	-1.04092	0.014347
	HORVU1Hr1G014010	1.17655	0.014347
	HORVU7Hr1G108210	-1.13686	0.0143856
	HORVU6Hr1G034380	1.03345	0.0144331
	HORVU2Hr1G099820	-1.5613	0.0145468
	HORVU5Hr1G069480	0.711971	0.0146606
	HORVU2Hr1G029240	0.753607	0.0146943
	HORVU6Hr1G080760	0.812733	0.0148296
	HORVU6Hr1G066050	-0.915619	0.014854
	HORVU4Hr1G061740	0.768818	0.0148925
	HORVU7Hr1G037600	1.36862	0.0149536
	HORVU5Hr1G122530	1.48711	0.0149811
	HORVU6Hr1G083350	1.19896	0.0150077
	HORVU1Hr1G046690	1.08251	0.0150265
	HORVU5Hr1G022550	0.866021	0.0151064
	HORVU2Hr1G017760	-0.834077	0.0152552
	HORVU1Hr1G028430	-1.20824	0.0153049
	HORVU4Hr1G048700	-0.770698	0.0153125
	HORVU0Hr1G022280	-0.844023	0.0153125
	HORVU0Hr1G012050	-1.15009	0.0153338
	HORVU6Hr1G014700	0.715514	0.0153398
	HORVU4Hr1G052450	1.56523	0.0153557
	HORVU2Hr1G073680	1.02629	0.0153655
	HORVU7Hr1G088140	0.759813	0.015369
	HORVU2Hr1G105130	1.03792	0.0154084
	HORVU6Hr1G008870	0.83934	0.0154963
	HORVU2Hr1G040910	0.828619	0.0155019
	HORVU5Hr1G008890	1.36472	0.0155019
	HORVU7Hr1G047130	-0.899726	0.0155019
	HORVU7Hr1G095400	-0.739718	0.0155019
	HORVU4Hr1G074840	1.32197	0.0155019
	HORVU3Hr1G010030	-0.76667	0.0155049
	HORVU4Hr1G074780	-1.28792	0.0155076
	HORVU6Hr1G057630	-0.987464	0.0155102
	HORVU3Hr1G067840	0.968856	0.0155367
	HORVU3Hr1G066390	-1.14893	0.0155564
	HORVU3Hr1G025920	0.558587	0.0156949
	HORVU3Hr1G063620	1.0599	0.0156949
	HORVU5Hr1G026360	1.24625	0.0157387
	HORVU2Hr1G025980	-0.709264	0.0157454
	HORVU3Hr1G034040	-0.806009	0.015823
	HORVU3Hr1G054780	-1.04157	0.0158546
	HORVU3Hr1G005780	-0.913908	0.0159785
	HORVU2Hr1G080630	-0.631573	0.0159875
	HORVU5Hr1G046200	-1.49027	0.0159875
	HORVU4Hr1G001350	0.620257	0.0159875
	HORVU4Hr1G052730	0.764613	0.0160945
	HORVU6Hr1G021520	-0.741333	0.0162061
	HORVU3Hr1G059720	-1.49656	0.0162765
	HORVU1Hr1G072720	-1.00099	0.0162765
	HORVU5Hr1G063630	0.940207	0.0164479
	HORVU2Hr1G076660	0.871786	0.0164639
	HORVU3Hr1G047220	-0.945897	0.0164639
	HORVU7Hr1G020780	-0.715962	0.016473
	HORVU5Hr1G067760	-1.29239	0.0165014
	HORVU3Hr1G009210	-0.553899	0.0165098
	HORVU5Hr1G058890	-1.11436	0.0165098
	HORVU5Hr1G082310	0.773988	0.016533
	HORVU3Hr1G084750	-0.710942	0.0165631
	HORVU3Hr1G107090	-0.933439	0.0165858
	HORVU3Hr1G067990	1.09313	0.0165956
	HORVU1Hr1G088280	-1.27553	0.0165956
	HORVU3Hr1G096860	-1.33043	0.0165978
	HORVU7Hr1G042000	0.802978	0.0166275
	HORVU2Hr1G105650	0.718644	0.016633
	HORVU7Hr1G057740	-1.24129	0.016633
	HORVU2Hr1G028260	0.848371	0.0166859
	HORVU3Hr1G086020	-0.744785	0.0166859
	HORVU6Hr1G066640	-0.952396	0.0167128
	HORVU1Hr1G014800	0.996959	0.0168241
	HORVU6Hr1G011860	-1.05172	0.016877
	HORVU6Hr1G085490	1.24869	0.0169128
	HORVU3Hr1G109180	-1.03573	0.0170153
	HORVU1Hr1G068870	0.600956	0.017051
	HORVU2Hr1G099410	-0.619325	0.0170696
	HORVU7Hr1G065200	1.02007	0.0171811
	HORVU7Hr1G120030	0.909873	0.0172166
	HORVU2Hr1G013450	-1.08413	0.0174937
	HORVU5Hr1G044370	-1.19278	0.0175087
	HORVU3Hr1G027470	0.97882	0.0175339
	HORVU0Hr1G018390	1.49502	0.0175494
	HORVU7Hr1G058120	-0.532301	0.0176313
	HORVU7Hr1G071450	0.84951	0.0176313
	HORVU4Hr1G002540	0.993049	0.0176313
	HORVU1Hr1G070250	-1.33318	0.0176618
	HORVU4Hr1G046480	0.698972	0.0177145
	HORVU4Hr1G072750	-0.894799	0.0177458
	HORVU5Hr1G116590	1.51755	0.0177688
	HORVU2Hr1G056820	0.678519	0.0178048
	HORVU4Hr1G089090	1.11929	0.0178302
	HORVU2Hr1G124880	0.845853	0.0178721
	HORVU5Hr1G009830	0.712553	0.0178721
	HORVU7Hr1G072710	1.05823	0.0178721
	HORVU1Hr1G037270	-1.44458	0.0180441
	HORVU7Hr1G052870	-0.956557	0.0180494
	HORVU4Hr1G006200	-0.75767	0.0180494
	HORVU2Hr1G101100	0.633573	0.0180849
	HORVU4Hr1G074130	-0.979522	0.0180961
	HORVU2Hr1G001160	0.996324	0.0181258
	HORVU5Hr1G059550	-0.758019	0.0182408
	HORVU4Hr1G071270	1.06778	0.0182408
	HORVU5Hr1G060340	1.15241	0.0184113
	HORVU6Hr1G070090	-1.15978	0.0184113
	HORVU6Hr1G005390	0.496448	0.0184927
	HORVU5Hr1G091820	1.13337	0.0186963
	HORVU2Hr1G085650	-0.791545	0.0187227
	HORVU2Hr1G110110	0.856977	0.0187227
	HORVU4Hr1G017140	-0.781238	0.0187227
	HORVU4Hr1G083080	0.581493	0.0187227
	HORVU6Hr1G051650	0.622882	0.0187485
	HORVU3Hr1G050490	0.899164	0.0188081
	HORVU3Hr1G054330	1.28317	0.0188081
	HORVU5Hr1G106640	-1.52903	0.0188081
	HORVU4Hr1G079180	-1.53663	0.0188081
	HORVU6Hr1G058620	-1.35883	0.0188081
	HORVU3Hr1G017100	1.20541	0.0188185
	HORVU2Hr1G027690	1.37303	0.0188264
	HORVU3Hr1G051530	1.08822	0.0188529
	HORVU5Hr1G042390	-1.06794	0.0188529
	HORVU2Hr1G078350	1.09034	0.018863
	HORVU3Hr1G072380	0.716963	0.018863
	HORVU2Hr1G012860	0.539784	0.018892
	HORVU5Hr1G114540	-0.550129	0.018892
	HORVU3Hr1G020500	1.5342	0.0189092
	HORVU1Hr1G067490	1.3958	0.0189125
	HORVU1Hr1G087620	-0.750871	0.018974
	HORVU2Hr1G022820	0.983658	0.0192182
	HORVU4Hr1G010030	-0.852356	0.0192182
	HORVU2Hr1G038740	0.62163	0.0192297
	HORVU5Hr1G106470	-0.978289	0.0193379
	HORVU7Hr1G118450	-0.787257	0.0193387
	HORVU2Hr1G019960	0.582537	0.0194041
	HORVU5Hr1G072770	-0.904028	0.0194041
	HORVU4Hr1G084600	0.789327	0.0194041
	HORVU1Hr1G038180	1.17856	0.0195207
	HORVU3Hr1G077230	0.987227	0.0196868
	HORVU6Hr1G093310	-1.2525	0.0196868
	HORVU1Hr1G091470	-1.11167	0.0197232
	HORVU1Hr1G060740	0.704307	0.0198236
	HORVU1Hr1G062130	-0.826866	0.0198236
	HORVU7Hr1G037180	-0.786398	0.0198355
	HORVU1Hr1G026140	-0.628832	0.0199361
	HORVU5Hr1G001320	0.956419	0.0199689
	HORVU7Hr1G117800	0.618299	0.0199872
	HORVU6Hr1G083620	-0.847387	0.0200751
	HORVU2Hr1G006850	0.901831	0.020086
	HORVU4Hr1G010720	-1.31097	0.0201773
	HORVU6Hr1G073980	0.627449	0.0201961
	HORVU0Hr1G005320	0.575682	0.0202118
	HORVU2Hr1G019810	0.814239	0.0202964
	HORVU4Hr1G012530	-1.06687	0.0203584
	HORVU1Hr1G087460	-0.906483	0.0204833
	HORVU2Hr1G117940	-1.29294	0.0207473
	HORVU5Hr1G005180	-0.595494	0.02075
	HORVU1Hr1G051050	0.997521	0.0207631
	HORVU2Hr1G011200	0.659004	0.0207716
	HORVU6Hr1G015690	-1.00806	0.0207716
	HORVU7Hr1G052580	-0.647321	0.020836
	HORVU1Hr1G071580	-0.779883	0.0208737
	HORVU1Hr1G089830	-1.07602	0.0208737
	HORVU2Hr1G068630	-1.12182	0.0209236
	HORVU3Hr1G006940	1.10144	0.021125
	HORVU1Hr1G029540	1.15268	0.0211622
	HORVU0Hr1G007370	-0.863774	0.0211622
	HORVU2Hr1G123370	-0.75208	0.021177
	HORVU3Hr1G048770	-1.50878	0.021177
	HORVU4Hr1G009190	1.43309	0.021177
	HORVU5Hr1G074900	-0.609889	0.0212455
	HORVU3Hr1G072520	-0.681739	0.0212705
	HORVU4Hr1G000490	-1.18367	0.0213387
	HORVU1Hr1G072590	1.17308	0.0214513
	HORVU2Hr1G019990	-1.46839	0.021507
	HORVU4Hr1G033860	-0.839843	0.021691
	HORVU6Hr1G052560	0.733649	0.0218185
	HORVU2Hr1G086950	1.50653	0.0218341
	HORVU2Hr1G121440	-0.758895	0.0218341
	HORVU0Hr1G018290	-1.13269	0.0219585
	HORVU7Hr1G097010	0.698632	0.0220881
	HORVU3Hr1G085210	-0.778507	0.0221209
	HORVU5Hr1G093160	1.14846	0.0221242
	HORVU1Hr1G026530	0.929863	0.0221242
	HORVU2Hr1G002720	0.859116	0.0222524
	HORVU2Hr1G005320	-0.748111	0.0222524
	HORVU3Hr1G101930	0.889913	0.0222524
	HORVU2Hr1G119680	-1.22942	0.0222623
	HORVU6Hr1G025280	0.731178	0.0223839
	HORVU5Hr1G040990	-0.939512	0.0224304
	HORVU1Hr1G000600	-0.919683	0.0224573
	HORVU2Hr1G126100	-0.970614	0.0225084
	HORVU6Hr1G093180	-0.860904	0.0226012
	HORVU7Hr1G043690	0.72706	0.0226891
	HORVU3Hr1G020140	-1.36568	0.0227384
	HORVU7Hr1G079430	0.874873	0.0227384
	HORVU3Hr1G030040	-0.809513	0.0227942
	HORVU2Hr1G105140	0.690659	0.0229491
	HORVU3Hr1G105420	-1.2918	0.0229491
	HORVU5Hr1G109260	-0.799433	0.0229491
	HORVU7Hr1G070870	0.868401	0.0229491
	HORVU7Hr1G086350	1.12073	0.02301
	HORVU2Hr1G091320	-0.551557	0.0233496
	HORVU4Hr1G059950	-0.859453	0.0233904
	HORVU6Hr1G073040	-0.5526	0.023792
	HORVU1Hr1G039600	-0.967273	0.023792
	HORVU5Hr1G079660	-0.887083	0.0238601
	HORVU5Hr1G018050	1.04144	0.0243982
	HORVU7Hr1G030670	0.98271	0.0245256
	HORVU6Hr1G081000	0.636476	0.0245256
	HORVU1Hr1G065150	-0.640481	0.0245442
	HORVU7Hr1G010250	-0.646093	0.0245819
	HORVU1Hr1G072990	-0.647592	0.0245991
	HORVU2Hr1G030610	-0.630201	0.0246345
	HORVU6Hr1G008780	-0.758543	0.0246345
	HORVU5Hr1G045440	-0.550972	0.0246404
	HORVU1Hr1G027700	-1.45094	0.0246723
	HORVU7Hr1G019830	0.693031	0.0246761
	HORVU6Hr1G088370	-0.83347	0.024745
	HORVU4Hr1G026030	-1.21028	0.0248592
	HORVU5Hr1G081460	1.07453	0.0249365
	HORVU6Hr1G087420	0.746557	0.0249365
	HORVU5Hr1G076510	-1.05783	0.0249479
	HORVU4Hr1G017450	-0.716627	0.0250563
	HORVU3Hr1G095450	0.948948	0.0252662
	HORVU5Hr1G095220	-1.21074	0.0252662
	HORVU1Hr1G043940	0.707613	0.0253134
	HORVU7Hr1G074580	0.790671	0.0255997
	HORVU2Hr1G007760	0.946327	0.025629
	HORVU2Hr1G034280	-1.28312	0.0257395
	HORVU1Hr1G019600	0.7758	0.0258054
	HORVU1Hr1G053310	1.03815	0.0258054
	HORVU4Hr1G002820	-1.05339	0.0258055
	HORVU7Hr1G099560	-0.621185	0.0258116
	HORVU5Hr1G014920	-0.820533	0.0258683
	HORVU3Hr1G029670	0.686806	0.0258735
	HORVU7Hr1G039810	-1.19922	0.0258735
	ENSRNA049460237	1.08836	0.0258912
	HORVU1Hr1G056120	0.862121	0.0258964
	HORVU5Hr1G014290	-0.588864	0.0259747
	HORVU4Hr1G006530	0.744347	0.0260815
	HORVU7Hr1G026720	-1.27106	0.026125
	HORVU5Hr1G011780	-0.928552	0.026127
	HORVU5Hr1G030040	0.766727	0.026145
	HORVU4Hr1G069480	-0.850274	0.0261976
	HORVU1Hr1G018720	0.672942	0.0263112
	HORVU6Hr1G070600	-0.571775	0.0265533
	HORVU5Hr1G067280	-0.836624	0.0265879
	HORVU4Hr1G056820	0.820765	0.0267477
	HORVU6Hr1G036830	0.617696	0.0267547
	HORVU3Hr1G070660	1.16553	0.0269354
	HORVU1Hr1G037550	0.684394	0.0269354
	HORVU1Hr1G083210	-1.47102	0.0269354
	HORVU5Hr1G037320	1.00592	0.0269688
	HORVU6Hr1G076110	-0.528355	0.0269688
	HORVU2Hr1G102660	1.41349	0.0270003
	HORVU2Hr1G007570	-0.633779	0.0271454
	HORVU2Hr1G014150	-1.02331	0.027227
	HORVU1Hr1G047110	0.740089	0.0272716
	HORVU3Hr1G002920	-0.897998	0.0273376
	HORVU2Hr1G116730	0.932901	0.0273443
	HORVU0Hr1G016430	-0.682022	0.0273772
	HORVU7Hr1G088030	0.819883	0.0276344
	HORVU6Hr1G029520	0.751767	0.0277902
	HORVU1Hr1G000810	-1.3436	0.0277902
	HORVU1Hr1G013210	-0.560696	0.0279835
	HORVU1Hr1G092250	-1.12246	0.0279835
	HORVU1Hr1G094880	0.958881	0.028143
	HORVU7Hr1G038980	0.716563	0.028265
	HORVU6Hr1G044840	1.02316	0.0282731
	HORVU1Hr1G049900	-0.861762	0.0282731
	HORVU1Hr1G066520	0.609367	0.0283224
	HORVU5Hr1G001090	-0.800205	0.0283394
	HORVU7Hr1G078850	-0.64283	0.0283394
	HORVU0Hr1G022520	1.40029	0.0283484
	HORVU3Hr1G088970	0.802849	0.0284386
	HORVU5Hr1G028460	0.76329	0.0284726
	HORVU2Hr1G106020	0.533687	0.0285032
	HORVU3Hr1G001140	0.890102	0.0285796
	HORVU2Hr1G069950	0.932631	0.0286337
	HORVU2Hr1G104690	-1.10448	0.0286612
	HORVU5Hr1G069600	1.03561	0.0286612
	HORVU3Hr1G090250	-1.1142	0.0286819
	HORVU6Hr1G070350	0.564047	0.0287109
	HORVU7Hr1G106150	0.77085	0.0287319
	HORVU1Hr1G019500	-1.05936	0.0287319
	HORVU5Hr1G094490	1.45955	0.0287786
	HORVU5Hr1G104380	0.720211	0.0290729
	HORVU2Hr1G082420	-0.600974	0.0291003
	HORVU5Hr1G117760	-0.733117	0.0291003
	HORVU4Hr1G083020	-0.813565	0.0291003
	HORVU6Hr1G034110	1.02064	0.0291003
	HORVU2Hr1G028520	-0.966716	0.0291375
	HORVU7Hr1G007580	1.0006	0.0291375
	HORVU1Hr1G024860	0.96698	0.0291375
	HORVU1Hr1G090130	-1.0792	0.0292471
	HORVU1Hr1G055890	-0.607348	0.0293359
	HORVU4Hr1G056630	1.19528	0.0293736
	HORVU3Hr1G084970	-1.14233	0.0294313
	HORVU7Hr1G070780	-0.635393	0.0295374
	HORVU3Hr1G002710	-0.737262	0.0295569
	HORVU7Hr1G080850	0.792485	0.0296786
	HORVU2Hr1G001320	0.821838	0.0298074
	HORVU5Hr1G080110	-1.11189	0.0298074
	HORVU6Hr1G069570	-0.577147	0.0298074
	HORVU6Hr1G014750	0.889534	0.0299505
	HORVU3Hr1G019340	0.840773	0.0300091
	HORVU3Hr1G069430	-1.04214	0.0301469
	HORVU3Hr1G080100	0.673666	0.0302058
	HORVU3Hr1G091020	1.44288	0.0302965
	HORVU5Hr1G094460	0.834893	0.0303199
	HORVU4Hr1G075990	0.693023	0.0303483
	HORVU7Hr1G041320	-1.42703	0.0303922
	HORVU1Hr1G018150	0.820381	0.0303922
	HORVU2Hr1G015360	-0.63988	0.0304195
	HORVU3Hr1G009240	-0.792371	0.0304195
	HORVU3Hr1G097140	-0.797978	0.0304852
	HORVU3Hr1G117890	-0.80008	0.0304852
	HORVU0Hr1G016350	0.814078	0.0304943
	HORVU5Hr1G084860	-0.962434	0.0307893
	HORVU5Hr1G103380	-0.585693	0.0308636
	HORVU2Hr1G006910	0.626787	0.0310091
	HORVU2Hr1G018190	-0.857283	0.0310091
	HORVU1Hr1G021550	-0.639199	0.0310091
	HORVU5Hr1G098290	-0.901214	0.0311742
	HORVU3Hr1G023160	1.14735	0.031222
	HORVU3Hr1G095620	-1.30067	0.0313297
	HORVU6Hr1G052810	1.21484	0.0313466
	HORVU2Hr1G003390	-1.1454	0.0317387
	HORVU5Hr1G035820	0.875022	0.0322391
	HORVU2Hr1G031740	-1.10806	0.032309
	HORVU0Hr1G039040	0.963025	0.0323117
	ENSRNA049489392	-1.13874	0.0323233
	HORVU4Hr1G076610	0.889017	0.0324731
	HORVU1Hr1G080860	-1.43778	0.032505
	HORVU1Hr1G065570	-1.0949	0.0325693
	HORVU4Hr1G057550	-0.7261	0.0328422
	ENSRNA050017576	1.17203	0.0328753
	HORVU4Hr1G057290	0.783323	0.032924
	HORVU1Hr1G079370	0.815466	0.0329902
	HORVU5Hr1G097710	0.886985	0.0330126
	HORVU4Hr1G022580	-0.55173	0.0330126
	HORVU2Hr1G073330	0.736909	0.0330651
	HORVU2Hr1G089620	-1.40551	0.0330651
	HORVU5Hr1G103330	0.664067	0.0330651
	HORVU2Hr1G041180	0.536704	0.0331432
	HORVU1Hr1G046740	1.3779	0.033269
	HORVU3Hr1G012850	0.850256	0.033296
	HORVU4Hr1G060330	-1.11257	0.033296
	HORVU1Hr1G001950	-1.42702	0.0334456
	HORVU4Hr1G028600	0.561927	0.0335804
	HORVU1Hr1G087760	1.28114	0.033781
	HORVU6Hr1G060250	-0.982305	0.03379
	HORVU2Hr1G073370	-0.602119	0.0338147
	HORVU1Hr1G066530	-0.907452	0.0338147
	HORVU6Hr1G034050	0.829495	0.0338198
	HORVU1Hr1G018600	-1.39338	0.0338198
	HORVU7Hr1G049080	0.882507	0.0341909
	HORVU1Hr1G088920	-1.00473	0.0341988
	HORVU7Hr1G035430	-0.838708	0.0342402
	HORVU2Hr1G124930	-0.917143	0.0342476
	HORVU5Hr1G076250	-0.731653	0.0342476
	HORVU0Hr1G017380	0.839798	0.0342476
	HORVU3Hr1G026920	-0.898353	0.0344093
	HORVU5Hr1G073970	0.598965	0.0344306
	HORVU7Hr1G096250	0.629756	0.0344306
	HORVU3Hr1G082000	1.01045	0.0344736
	HORVU5Hr1G045180	-0.834265	0.0344798
	HORVU7Hr1G027710	0.886715	0.034633
	HORVU4Hr1G068500	0.864194	0.034633
	HORVU7Hr1G074690	-0.632	0.0350395
	HORVU0Hr1G000620	-0.916291	0.0352144
	HORVU5Hr1G107260	0.841213	0.0352422
	HORVU1Hr1G075160	0.767574	0.0352422
	HORVU3Hr1G095730	-1.33494	0.0352672
	HORVU7Hr1G112410	0.688032	0.0354253
	HORVU6Hr1G071920	-1.16614	0.0354655
	HORVU1Hr1G020430	1.12746	0.0356055
	HORVU1Hr1G060620	-1.15191	0.0356741
	HORVU6Hr1G003910	0.812482	0.035684
	HORVU2Hr1G021550	-0.926317	0.0358724
	HORVU2Hr1G046360	1.22209	0.0359577
	HORVU1Hr1G036490	1.4163	0.0361876
	HORVU4Hr1G076970	-0.863849	0.0362284
	HORVU2Hr1G045140	0.817474	0.0362945
	HORVU5Hr1G078110	0.869957	0.0364183
	HORVU5Hr1G125710	-1.01009	0.036496
	HORVU5Hr1G085680	0.929261	0.0365123
	HORVU0Hr1G009380	-0.919397	0.0365123
	HORVU6Hr1G084390	-0.628011	0.0367366
	HORVU3Hr1G090080	0.751286	0.0367425
	HORVU2Hr1G061910	-1.37529	0.0367728
	HORVU7Hr1G113850	-0.641118	0.036794
	HORVU6Hr1G004860	0.645873	0.0368399
	HORVU6Hr1G000830	0.7776	0.0368508
	HORVU7Hr1G053780	-1.14004	0.0369028
	HORVU7Hr1G100230	-0.560508	0.0369761
	HORVU6Hr1G082990	1.17782	0.0370544
	HORVU5Hr1G052280	0.531637	0.0371835
	HORVU5Hr1G054880	-0.948889	0.0373481
	HORVU1Hr1G046990	-0.841472	0.0374432
	HORVU7Hr1G049580	-1.38873	0.0374464
	HORVU2Hr1G015470	-0.669785	0.037474
	HORVU7Hr1G036780	-0.789755	0.037474
	HORVU3Hr1G066810	-0.813271	0.037598
	HORVU3Hr1G068500	0.938528	0.0376677
	HORVU3Hr1G056370	-1.32316	0.0381136
	HORVU4Hr1G060870	-1.12647	0.0382132
	HORVU4Hr1G013420	-1.03246	0.038231
	HORVU3Hr1G089880	0.941965	0.0383095
	HORVU2Hr1G116390	0.518819	0.0387216
	HORVU7Hr1G075700	0.721604	0.0388604
	HORVU3Hr1G093620	-0.615754	0.0389599
	HORVU3Hr1G077490	0.951923	0.0391713
	HORVU0Hr1G000710	-1.03565	0.0391713
	HORVU5Hr1G051310	-0.622399	0.0393828
	HORVU1Hr1G063220	0.616439	0.0393828
	HORVU4Hr1G054880	1.07451	0.0395055
	HORVU6Hr1G064470	0.816635	0.0395055
	HORVU6Hr1G070420	0.481295	0.0395055
	HORVU3Hr1G091200	0.696088	0.0396107
	HORVU7Hr1G098280	-0.789431	0.03969
	HORVU4Hr1G049150	0.595943	0.0398115
	HORVU6Hr1G084650	0.500471	0.0398115
	HORVU3Hr1G022340	-0.703719	0.039833
	HORVU7Hr1G040370	-0.906904	0.0400013
	HORVU3Hr1G090820	-0.820814	0.0400074
	HORVU1Hr1G092950	0.671232	0.0400811
	HORVU5Hr1G053930	0.529638	0.040202
	HORVU3Hr1G085860	0.913556	0.0402277
	HORVU5Hr1G068070	0.754253	0.0402277
	HORVU4Hr1G078020	0.884288	0.0402277
	HORVU1Hr1G063470	-1.23328	0.0402277
	HORVU5Hr1G051970	-1.09641	0.0403285
	HORVU2Hr1G108010	0.619469	0.040367
	HORVU4Hr1G009060	-0.891954	0.040442
	HORVU7Hr1G098220	-1.04106	0.0404783
	HORVU7Hr1G075300	0.850861	0.040659
	HORVU1Hr1G081980	0.661721	0.0406798
	HORVU1Hr1G081770	0.868608	0.0411381
	HORVU2Hr1G037000	-0.774422	0.0412346
	HORVU2Hr1G095970	-1.28367	0.0412346
	HORVU4Hr1G026770	-0.945062	0.0412346
	HORVU6Hr1G047870	-0.926301	0.0412346
	HORVU0Hr1G013800	-0.835404	0.0412346
	HORVU3Hr1G092860	-0.689351	0.0413211
	HORVU7Hr1G095220	0.807267	0.0413481
	HORVU7Hr1G090850	0.711465	0.0413566
	HORVU5Hr1G022510	0.587545	0.0415111
	HORVU7Hr1G115460	0.859227	0.0416043
	HORVU5Hr1G124980	1.22924	0.0416119
	HORVU6Hr1G091660	-1.24941	0.0416119
	HORVU4Hr1G080940	0.842818	0.0416982
	HORVU7Hr1G088980	-0.714709	0.0416996
	HORVU4Hr1G056050	-0.557694	0.0416996
	HORVU5Hr1G084510	1.00496	0.0418394
	HORVU4Hr1G085150	-1.28897	0.0418394
	HORVU5Hr1G018660	0.64094	0.0421302
	HORVU6Hr1G051740	-0.810534	0.042397
	HORVU3Hr1G071320	-0.653474	0.0424444
	HORVU1Hr1G066610	0.609945	0.0424825
	HORVU5Hr1G023480	-0.796125	0.0425277
	HORVU4Hr1G065270	-1.36181	0.0426384
	HORVU5Hr1G084260	-0.858671	0.042694
	HORVU5Hr1G061870	0.908354	0.042731
	HORVU5Hr1G006550	-1.29063	0.0429245
	HORVU0Hr1G016480	-0.852112	0.0429485
	HORVU4Hr1G016470	0.737496	0.0430064
	HORVU1Hr1G051740	0.783234	0.0430064
	HORVU7Hr1G104220	0.480705	0.0430659
	HORVU3Hr1G073670	0.652825	0.0431221
	HORVU3Hr1G074950	-1.0164	0.0431221
	HORVU3Hr1G094300	-1.19648	0.0431221
	HORVU5Hr1G022050	-0.834251	0.0431221
	HORVU1Hr1G087320	-0.540477	0.0431221
	HORVU7Hr1G049860	0.658024	0.0431287
	HORVU7Hr1G084240	0.73814	0.0433398
	HORVU6Hr1G064340	-0.74937	0.0433398
	HORVU6Hr1G023070	0.856313	0.0433405
	HORVU1Hr1G090860	0.750538	0.0433756
	HORVU7Hr1G115330	-0.758223	0.0434328
	HORVU3Hr1G047230	0.935767	0.0436648
	HORVU5Hr1G071270	-0.880127	0.0438633
	HORVU7Hr1G108830	1.18644	0.0439979
	HORVU7Hr1G113530	0.709849	0.0439979
	HORVU4Hr1G056740	0.698885	0.0439979
	HORVU3Hr1G011870	-1.15327	0.0440625
	HORVU4Hr1G012440	0.654206	0.0440625
	HORVU3Hr1G010100	-1.18532	0.0440994
	HORVU1Hr1G068320	-0.905407	0.0442265
	HORVU5Hr1G068100	1.22954	0.0443065
	HORVU1Hr1G035130	0.911621	0.0444796
	HORVU3Hr1G021220	-1.01638	0.0445312
	HORVU3Hr1G073630	0.677007	0.0445312
	HORVU3Hr1G098340	-0.831825	0.0445312
	HORVU5Hr1G054180	0.810622	0.0445312
	HORVU6Hr1G062430	1.20521	0.0445312
	HORVU2Hr1G121820	-1.35568	0.044701
	HORVU5Hr1G098920	1.11921	0.0447833
	HORVU5Hr1G047630	1.13278	0.0448391
	HORVU6Hr1G087780	0.870188	0.0448391
	HORVU6Hr1G075590	-0.598904	0.0448957
	HORVU6Hr1G092740	-1.31372	0.0449295
	HORVU5Hr1G081810	1.12727	0.0451803
	HORVU5Hr1G098740	0.475051	0.0451803
	HORVU1Hr1G090430	-0.6287	0.0452319
	HORVU5Hr1G075200	0.544474	0.0453895
	HORVU7Hr1G114510	-0.728461	0.0454167
	HORVU6Hr1G092960	0.818381	0.0456249
	HORVU3Hr1G060390	-0.643748	0.0457263
	HORVU4Hr1G070220	0.533977	0.0458045
	HORVU5Hr1G104750	1.36937	0.0458438
	HORVU5Hr1G036250	0.458035	0.0459325
	HORVU1Hr1G004720	1.11744	0.0459325
	HORVU4Hr1G082740	-0.869261	0.0459527
	HORVU1Hr1G007810	0.756464	0.0459751
	HORVU2Hr1G107740	0.864706	0.0460375
	HORVU7Hr1G089510	-0.611555	0.0460375
	HORVU6Hr1G067300	0.572252	0.046145
	HORVU6Hr1G078700	0.986157	0.0462409
	HORVU5Hr1G060060	-0.865168	0.0462496
	HORVU6Hr1G006560	-0.702574	0.0463598
	HORVU3Hr1G079540	0.656782	0.0463624
	HORVU7Hr1G102030	0.727278	0.0463837
	HORVU2Hr1G048010	1.02265	0.0464516
	HORVU7Hr1G117970	-0.631504	0.0464516
	HORVU2Hr1G081540	-1.10752	0.0464627
	HORVU5Hr1G088350	0.86051	0.0465294
	HORVU3Hr1G074390	1.01211	0.0466125
	HORVU4Hr1G056120	0.791501	0.0466716
	HORVU1Hr1G039250	0.632806	0.0467897
	HORVU4Hr1G055910	1.01127	0.046793
	HORVU4Hr1G020770	0.735066	0.0468129
	HORVU2Hr1G031450	0.475603	0.0469952
	HORVU2Hr1G091170	1.04745	0.0469952
	HORVU5Hr1G010440	1.21048	0.0469952
	HORVU2Hr1G020690	0.91823	0.0472174
	HORVU2Hr1G096890	0.946368	0.0472699
	HORVU7Hr1G086170	1.1023	0.0473081
	HORVU5Hr1G099820	-0.884763	0.0476774
	HORVU6Hr1G080870	-0.569765	0.0478013
	HORVU1Hr1G047220	1.00524	0.0478918
	HORVU6Hr1G089310	-0.768834	0.0480192
	HORVU6Hr1G076860	0.853904	0.0481867
	HORVU1Hr1G051410	0.943721	0.0482653
	HORVU1Hr1G053340	-0.672339	0.0482653
	HORVU3Hr1G025400	1.31234	0.0483314
	HORVU3Hr1G105380	-0.648724	0.0483574
	HORVU2Hr1G079020	0.682911	0.048381
	HORVU5Hr1G088760	-0.475114	0.048381
	HORVU6Hr1G034350	1.04503	0.048381
	HORVU3Hr1G000160	1.14175	0.0485314
	HORVU3Hr1G093140	-1.35233	0.0485491
	HORVU7Hr1G105880	-0.526997	0.0485491
	HORVU1Hr1G021160	-1.15272	0.0485491
	HORVU3Hr1G067760	0.692795	0.0485671
	HORVU4Hr1G000950	-1.15125	0.0486495
	HORVU3Hr1G061850	-0.710384	0.0487454
	HORVU2Hr1G108050	0.818774	0.0488338
	HORVU7Hr1G060970	-0.755768	0.0488338
	HORVU5Hr1G111410	0.684539	0.0488666
	HORVU5Hr1G112970	-1.22566	0.0488783
	HORVU5Hr1G068230	-0.85867	0.0488914
	HORVU5Hr1G018930	0.948447	0.049179
	HORVU4Hr1G020660	0.745965	0.0494352
	HORVU2Hr1G032680	-0.942099	0.0494471
	HORVU5Hr1G025760	1.0058	0.0494477
	HORVU7Hr1G043490	1.27066	0.0494844
	HORVU7Hr1G023980	-0.676499	0.0495896
	HORVU4Hr1G068760	0.62191	0.0495896
	HORVU4Hr1G088080	-0.752063	0.0495896
	HORVU1Hr1G082190	-1.30788	0.049759
	HORVU4Hr1G054970	0.621819	0.0499
	HORVU6Hr1G056570	0.822413	0.0499156
	HORVU5Hr1G046900	-0.908585	0.0499418
	HORVU3Hr1G019360	-0.82832	0.0501291
	HORVU1Hr1G063700	0.885105	0.0501291
	HORVU4Hr1G074270	0.855354	0.0501855
	HORVU4Hr1G090720	-0.750582	0.0501855
	HORVU5Hr1G098440	1.16468	0.0503195
	HORVU5Hr1G061990	0.89416	0.0507146
	HORVU0Hr1G031170	-1.23053	0.0508878
	HORVU2Hr1G089050	1.13668	0.0509196
	HORVU5Hr1G036460	0.608599	0.0509691
	HORVU7Hr1G018230	-1.15262	0.0509691
	HORVU3Hr1G017410	0.605971	0.0511228
	HORVU2Hr1G126230	-0.629543	0.0511573
	HORVU7Hr1G020620	1.19201	0.0514032
	HORVU1Hr1G048760	0.775538	0.0516367
	HORVU4Hr1G063790	0.9602	0.0517812
	HORVU6Hr1G092290	-0.731067	0.0518908
	HORVU2Hr1G050790	-0.666912	0.0518913
	HORVU5Hr1G096420	-0.851127	0.0518995
	HORVU7Hr1G114400	-0.704564	0.0518995
	HORVU4Hr1G024430	-0.614567	0.0518995
	HORVU6Hr1G069380	-1.34228	0.0518995
	HORVU1Hr1G041630	-0.901731	0.0518995
	HORVU1Hr1G017120	0.480978	0.0520299
	HORVU7Hr1G008070	0.573444	0.0521583
	HORVU3Hr1G011850	-1.08246	0.0522043
	HORVU7Hr1G090880	1.1516	0.0522415
	HORVU4Hr1G034200	0.570235	0.0523655
	HORVU4Hr1G055160	-0.890043	0.0523655
	HORVU6Hr1G076450	0.622682	0.0523692
	HORVU3Hr1G062570	-0.665485	0.0524409
	HORVU7Hr1G109750	1.14329	0.0524818
	HORVU1Hr1G036440	1.13096	0.0530757
	HORVU5Hr1G037440	0.618	0.0531334
	HORVU2Hr1G065080	-0.735798	0.0531467
	HORVU2Hr1G009580	0.578497	0.0532042
	HORVU3Hr1G089370	1.07822	0.0532042
	HORVU1Hr1G053840	-0.572958	0.0532042
	HORVU1Hr1G056570	-1.32158	0.0532052
	HORVU2Hr1G111540	1.21627	0.0533546
	HORVU7Hr1G021890	-0.693769	0.0534399
	HORVU2Hr1G077890	0.968299	0.053558
	HORVU7Hr1G008700	1.08473	0.0538248
	HORVU6Hr1G091130	-0.599848	0.0538535
	HORVU5Hr1G069090	-0.782322	0.0540322
	HORVU4Hr1G015550	-0.651255	0.0540437
	HORVU1Hr1G085730	0.648498	0.0540945
	HORVU4Hr1G021390	-0.909768	0.0541439
	HORVU2Hr1G085000	0.763923	0.0543997
	HORVU4Hr1G085510	0.583132	0.0544131
	HORVU3Hr1G025020	1.00238	0.0544624
	HORVU2Hr1G087500	-0.694128	0.054516
	HORVU7Hr1G098320	-0.587822	0.054644
	HORVU1Hr1G061010	-0.569405	0.054644
	HORVU5Hr1G110120	-0.55782	0.0547404
	HORVU2Hr1G077080	-0.507427	0.0548167
	HORVU2Hr1G079040	-1.11618	0.0548548
	HORVU2Hr1G075230	-1.32876	0.054965
	HORVU1Hr1G066770	-0.855763	0.0550189
	HORVU6Hr1G061220	0.666767	0.0552155
	HORVU3Hr1G084420	1.12492	0.0552248
	HORVU5Hr1G024410	-0.437553	0.0552527
	HORVU5Hr1G088360	0.828446	0.0556008
	HORVU5Hr1G009350	0.952273	0.0556425
	HORVU3Hr1G093760	-0.906041	0.0557579
	HORVU4Hr1G069660	-0.741352	0.0557949
	HORVU3Hr1G048820	-0.925536	0.0558485
	HORVU3Hr1G054600	0.881456	0.0558485
	HORVU4Hr1G085970	-0.757615	0.0558485
	HORVU6Hr1G072390	1.31785	0.056446
	HORVU5Hr1G109250	-0.800447	0.0565631
	HORVU7Hr1G078690	-0.970542	0.0565631
	HORVU4Hr1G028610	0.887496	0.0565631
	HORVU5Hr1G062050	-0.628638	0.0566313
	HORVU4Hr1G078500	-0.835408	0.0567559
	HORVU1Hr1G009920	-0.633286	0.0567631
	HORVU3Hr1G043390	0.599685	0.0567744
	HORVU4Hr1G016940	0.660944	0.0568356
	HORVU6Hr1G046420	0.697318	0.0568356
	HORVU6Hr1G056950	-0.764701	0.0568356
	HORVU6Hr1G067930	0.706113	0.0568383
	HORVU1Hr1G017900	-0.772261	0.0568537
	HORVU3Hr1G073960	-0.583705	0.0568725
	HORVU4Hr1G028910	-0.671431	0.0569367
	HORVU6Hr1G052140	-0.825339	0.0572166
	HORVU2Hr1G063510	0.561408	0.0572672
	HORVU7Hr1G079310	0.741415	0.0574251
	HORVU3Hr1G071340	0.963232	0.057726
	HORVU2Hr1G026340	-0.514336	0.0577794
	HORVU3Hr1G029770	0.818861	0.05795
	HORVU2Hr1G114230	-1.31449	0.0581103
	HORVU2Hr1G006280	-0.481131	0.0581502
	HORVU7Hr1G039780	-0.512711	0.0581502
	HORVU1Hr1G075780	1.01003	0.0581502
	HORVU7Hr1G002110	-0.671526	0.0581505
	HORVU7Hr1G035670	-0.69329	0.0581572
	HORVU1Hr1G077420	-1.16608	0.0582368
	HORVU7Hr1G046970	-0.732493	0.0582589
	HORVU5Hr1G034530	-0.685057	0.0583791
	HORVU6Hr1G088140	0.927218	0.0585512
	HORVU2Hr1G060770	-0.621455	0.0585599
	HORVU3Hr1G077400	1.12686	0.0585599
	HORVU3Hr1G113640	-0.822927	0.0585599
	HORVU5Hr1G106010	-0.908196	0.0587559
	HORVU7Hr1G103510	-0.598351	0.0587559
	HORVU2Hr1G088480	0.780872	0.0588386
	HORVU0Hr1G000780	-0.746726	0.0592637
	HORVU0Hr1G016170	-0.658253	0.05945
	HORVU6Hr1G067880	1.19735	0.0594987
	HORVU5Hr1G109880	0.7364	0.0595521
	HORVU5Hr1G076710	-0.990125	0.0596125
	HORVU4Hr1G081600	0.541848	0.0598547
	HORVU4Hr1G005670	0.726829	0.0601423
	HORVU7Hr1G112910	0.797175	0.0602197
	HORVU2Hr1G069470	-0.58357	0.0603303
	HORVU5Hr1G092790	0.779053	0.0603303
	HORVU4Hr1G078580	0.760314	0.0603303
	HORVU6Hr1G022590	1.2395	0.0603303
	HORVU0Hr1G003480	0.705833	0.0603303
	HORVU3Hr1G074850	1.03324	0.0603832
	HORVU1Hr1G075150	-0.522972	0.0603832
	HORVU3Hr1G040920	-0.719927	0.0604332
	HORVU3Hr1G050320	0.925326	0.0604765
	HORVU5Hr1G111000	-1.30894	0.0605462
	HORVU2Hr1G109330	0.868763	0.060668
	HORVU3Hr1G109230	-0.868285	0.0607331
	HORVU2Hr1G032920	-0.779473	0.0607347
	HORVU1Hr1G084700	0.77113	0.0608342
	HORVU5Hr1G048010	0.521735	0.0609115
	HORVU4Hr1G073650	1.08741	0.0609115
	HORVU7Hr1G083220	0.70161	0.0609669
	HORVU4Hr1G069210	0.465272	0.0609669
	HORVU2Hr1G087460	-1.30641	0.0611038
	HORVU2Hr1G030660	-1.24166	0.0611971
	HORVU2Hr1G109030	-0.566753	0.0611971
	HORVU3Hr1G007210	1.0229	0.0611971
	HORVU3Hr1G052880	-0.763138	0.0611971
	HORVU3Hr1G065390	-0.7191	0.0611971
	HORVU5Hr1G046250	-0.54863	0.0611971
	HORVU5Hr1G057330	-0.681737	0.0611971
	HORVU7Hr1G122120	1.0168	0.0611971
	HORVU1Hr1G000010	-0.607904	0.0611971
	HORVU1Hr1G021150	-0.650701	0.0611971
	HORVU1Hr1G030200	-0.474864	0.0611971
	HORVU3Hr1G094100	1.18849	0.0613043
	HORVU4Hr1G011280	-0.603506	0.0613822
	HORVU7Hr1G082560	0.609358	0.0615682
	HORVU1Hr1G010250	0.545342	0.0615682
	HORVU3Hr1G109930	-1.11305	0.0616968
	HORVU2Hr1G114900	-0.975682	0.0617794
	HORVU2Hr1G045490	0.529785	0.0618256
	HORVU5Hr1G104160	0.720592	0.0618256
	HORVU7Hr1G012840	-0.742875	0.0618256
	HORVU7Hr1G098830	-0.898383	0.0618256
	HORVU4Hr1G022420	-0.534374	0.0618256
	HORVU1Hr1G088870	-0.514176	0.0620154
	HORVU5Hr1G019880	-1.17687	0.0621798
	HORVU7Hr1G119340	-1.2502	0.0622572
	HORVU3Hr1G086190	0.460254	0.0627788
	HORVU5Hr1G015390	0.999898	0.0628933
	HORVU2Hr1G103520	0.686434	0.0629499
	HORVU3Hr1G005990	-1.29432	0.0629499
	HORVU3Hr1G037600	0.624688	0.0629499
	HORVU3Hr1G071770	0.652904	0.0629499
	HORVU5Hr1G029110	0.657347	0.0629499
	HORVU2Hr1G068120	0.676493	0.0629733
	HORVU4Hr1G008870	0.784737	0.0630127
	HORVU2Hr1G099810	0.59386	0.0630156
	HORVU2Hr1G080720	1.00325	0.0630462
	HORVU7Hr1G043590	0.867251	0.0630727
	HORVU5Hr1G066190	-0.600007	0.0630763
	HORVU1Hr1G003270	0.914243	0.0632041
	HORVU3Hr1G018130	1.11329	0.0634971
	HORVU1Hr1G063740	-0.838997	0.0636063
	HORVU6Hr1G001060	0.636003	0.0636817
	HORVU7Hr1G058220	-1.24978	0.0638394
	HORVU5Hr1G068550	1.28131	0.063862
	HORVU2Hr1G109010	0.855518	0.0639087
	HORVU3Hr1G113120	-0.774817	0.0639087
	HORVU5Hr1G045700	0.791979	0.0639087
	HORVU2Hr1G039510	0.484276	0.0639572
	HORVU7Hr1G085750	-0.633566	0.064628
	HORVU4Hr1G034650	0.80544	0.064628
	HORVU6Hr1G063560	0.690406	0.0647799
	HORVU7Hr1G118340	1.02062	0.0648543
	HORVU6Hr1G083160	0.635638	0.0648548
	HORVU6Hr1G072540	0.672198	0.065114
	HORVU1Hr1G086380	0.998302	0.0652341
	HORVU0Hr1G017110	-0.848568	0.0652341
	HORVU1Hr1G055900	-0.60799	0.0655815
	HORVU7Hr1G093630	0.540555	0.0656204
	HORVU7Hr1G118500	0.907273	0.0656204
	HORVU1Hr1G064890	0.66908	0.0657803
	HORVU1Hr1G010230	0.503143	0.0658753
	HORVU3Hr1G006000	0.623007	0.0659638
	HORVU2Hr1G114260	-0.547548	0.0660161
	HORVU2Hr1G073400	-1.28707	0.0660415
	HORVU4Hr1G002570	1.19086	0.0660415
	HORVU6Hr1G000090	0.946325	0.0660415
	HORVU6Hr1G025270	0.76489	0.0660833
	HORVU7Hr1G011250	-1.07571	0.0661222
	HORVU5Hr1G094300	-0.529713	0.0662442
	HORVU7Hr1G089470	0.760742	0.0663809
	HORVU4Hr1G009520	0.525349	0.0663991
	HORVU1Hr1G049100	-0.761155	0.0663991
	HORVU5Hr1G079680	-1.22587	0.0664226
	HORVU2Hr1G020430	0.965662	0.0666928
	HORVU7Hr1G034120	-0.717583	0.0666928
	HORVU1Hr1G074550	-1.04872	0.0666928
	HORVU2Hr1G021060	-0.789243	0.0674533
	HORVU4Hr1G081070	-0.769158	0.0674644
	HORVU7Hr1G116750	-1.05525	0.0675881
	HORVU6Hr1G003160	-0.861275	0.067629
	HORVU6Hr1G095250	0.594483	0.067629
	HORVU2Hr1G022100	0.818791	0.0676504
	HORVU5Hr1G017220	-1.00163	0.0677316
	HORVU5Hr1G109360	-0.951247	0.0677682
	HORVU6Hr1G054890	-0.493095	0.0677682
	HORVU2Hr1G120150	-0.755368	0.0681486
	HORVU1Hr1G024400	0.616575	0.0681486
	HORVU3Hr1G086310	0.632212	0.0681675
	HORVU4Hr1G003270	0.829933	0.0681675
	HORVU6Hr1G076190	-0.563133	0.0681675
	HORVU2Hr1G008390	1.04294	0.0681945
	HORVU2Hr1G083710	0.840208	0.0681945
	HORVU7Hr1G007840	1.27772	0.0681945
	HORVU1Hr1G083710	0.818231	0.0681945
	HORVU2Hr1G118060	0.69972	0.0682529
	HORVU5Hr1G026650	0.54128	0.0682529
	HORVU1Hr1G058090	-0.742591	0.0682529
	HORVU1Hr1G080980	0.537041	0.0682529
	HORVU1Hr1G063150	0.826259	0.0684728
	HORVU1Hr1G080060	0.566102	0.0685433
	HORVU1Hr1G037650	0.729498	0.0686751
	HORVU4Hr1G004270	0.977318	0.0687036
	HORVU6Hr1G077670	-0.70275	0.0687036
	HORVU2Hr1G057670	-0.650497	0.0687946
	HORVU2Hr1G118770	0.784134	0.0687946
	HORVU5Hr1G097840	-0.758058	0.0687946
	HORVU5Hr1G120210	-1.0305	0.0687946
	HORVU4Hr1G066870	0.776817	0.0687946
	HORVU6Hr1G070380	1.07885	0.0687946
	HORVU6Hr1G073540	1.27522	0.0687946
	HORVU1Hr1G061710	-1.0065	0.0687946
	HORVU3Hr1G084110	0.917932	0.0688737
	HORVU6Hr1G056850	1.21145	0.0688737
	HORVU1Hr1G048700	0.556899	0.0688737
	HORVU0Hr1G018000	0.769538	0.0688737
	HORVU7Hr1G096430	0.695971	0.0690159
	HORVU5Hr1G095580	1.26703	0.0690823
	HORVU3Hr1G019510	0.480549	0.0693216
	HORVU7Hr1G040110	-0.757205	0.0693216
	HORVU6Hr1G065900	-0.92534	0.0693598
	HORVU2Hr1G087510	-0.985648	0.0694385
	HORVU5Hr1G013360	0.930615	0.0697372
	HORVU2Hr1G081640	-1.20751	0.0699236
	HORVU5Hr1G053580	0.728363	0.0699279
	HORVU7Hr1G117880	-0.619802	0.0699279
	HORVU1Hr1G052400	0.719201	0.0699279
	HORVU5Hr1G007480	0.610685	0.0699387
	HORVU5Hr1G006350	1.25175	0.0703063
	HORVU2Hr1G094690	0.77948	0.0703516
	HORVU3Hr1G001510	-1.05452	0.0704114
	HORVU7Hr1G096990	0.553262	0.070473
	HORVU1Hr1G090100	0.725545	0.070473
	HORVU6Hr1G059290	0.856412	0.0704741
	HORVU5Hr1G040920	-0.610537	0.0709824
	HORVU3Hr1G093750	1.22272	0.0710761
	HORVU3Hr1G077530	0.777413	0.0711894
	HORVU3Hr1G034880	0.952549	0.0711981
	HORVU7Hr1G077370	-1.1031	0.0711981
	HORVU6Hr1G062230	0.795349	0.0711981
	HORVU6Hr1G089780	-0.507485	0.0711981
	HORVU3Hr1G004320	0.729434	0.0712616
	HORVU5Hr1G112900	-0.849992	0.0715114
	HORVU6Hr1G010680	1.09677	0.0715114
	HORVU1Hr1G003810	-0.90485	0.0715114
	HORVU1Hr1G016660	0.560405	0.0718612
	HORVU4Hr1G013380	1.12373	0.0719148
	HORVU7Hr1G077110	-1.26624	0.0720201
	HORVU3Hr1G017160	-0.656597	0.072091
	HORVU5Hr1G053060	1.07727	0.072091
	HORVU5Hr1G069610	-0.995997	0.072091
	HORVU6Hr1G068770	0.709559	0.072091
	HORVU2Hr1G081880	0.72405	0.0721989
	HORVU2Hr1G081460	0.531303	0.0725546
	HORVU7Hr1G027010	-0.501585	0.0725933
	HORVU5Hr1G077350	-0.505286	0.0726147
	HORVU5Hr1G023710	1.25642	0.072751
	HORVU1Hr1G093350	0.818604	0.0728006
	HORVU2Hr1G036960	-0.442149	0.0728565
	HORVU6Hr1G017340	1.00815	0.0729248
	HORVU3Hr1G112080	-1.25143	0.0730581
	HORVU6Hr1G055250	-0.593967	0.0730581
	HORVU1Hr1G080460	0.70476	0.0731542
	HORVU3Hr1G096920	-1.0326	0.0731611
	HORVU7Hr1G082590	-0.650836	0.0731865
	HORVU2Hr1G109590	0.594469	0.0732352
	HORVU4Hr1G087800	-1.25345	0.0732352
	HORVU6Hr1G067120	-0.761235	0.0732352
	HORVU7Hr1G090830	-0.759905	0.0735093
	HORVU3Hr1G000760	-0.630176	0.0735527
	HORVU3Hr1G097070	-0.751373	0.0735527
	HORVU3Hr1G107350	-1.1669	0.0736041
	HORVU2Hr1G005630	-0.853801	0.0736187
	HORVU3Hr1G061060	-0.461726	0.0736187
	HORVU3Hr1G058910	0.569997	0.0739782
	HORVU4Hr1G056700	0.525723	0.0740211
	HORVU5Hr1G000590	-0.712919	0.0740669
	HORVU3Hr1G036870	0.73383	0.074075
	HORVU2Hr1G081750	-0.531884	0.0746256
	HORVU2Hr1G013680	0.50295	0.0746337
	HORVU2Hr1G123270	0.536286	0.0746337
	HORVU3Hr1G092470	-0.767435	0.0746337
	HORVU2Hr1G026200	0.918295	0.0746854
	HORVU3Hr1G016990	-1.08333	0.0746854
	HORVU4Hr1G069790	-0.840158	0.0746854
	HORVU4Hr1G072280	0.654542	0.0748247
	HORVU4Hr1G007020	-0.593719	0.0752291
	HORVU2Hr1G086390	0.661108	0.0753913
[truncated: 15,210 more rows]

## Sheet: Root H2O2+LaCl3 raw
	Gene-ID	Log2FC	FDR
DEGs (FDR<0.01)	HORVU5Hr1G119480	5.04615	1.82098e-67
	HORVU7Hr1G024190	5.51322	4.41813e-51
	HORVU2Hr1G017420	3.88785	4.80716e-49
	HORVU4Hr1G072300	3.45953	6.18785e-44
	HORVU6Hr1G027810	3.77823	1.44507e-38
	HORVU1Hr1G072890	3.6301	5.0031e-38
	HORVU7Hr1G085170	5.0009	1.83479e-36
	HORVU7Hr1G098370	3.31888	3.62718e-34
	HORVU5Hr1G016780	-2.10127	2.27048e-31
	HORVU3Hr1G034040	2.0704	2.83017e-30
	HORVU3Hr1G024200	2.50618	1.64124e-29
	HORVU4Hr1G071790	2.01983	2.91647e-29
	HORVU5Hr1G019590	1.61115	1.24249e-28
	HORVU4Hr1G013840	4.42048	2.66088e-28
	HORVU6Hr1G020140	1.86531	5.1481e-28
	HORVU4Hr1G057890	2.77083	3.1307e-26
	HORVU3Hr1G093270	3.39609	1.1109e-25
	HORVU5Hr1G016810	1.75156	4.70584e-25
	HORVU4Hr1G085800	5.07309	4.70584e-25
	HORVU7Hr1G103060	2.37665	8.33486e-25
	HORVU4Hr1G057740	2.53021	3.40256e-24
	HORVU3Hr1G000650	-3.16557	8.09829e-24
	HORVU7Hr1G102840	1.63324	4.34392e-23
	HORVU0Hr1G007220	-2.71939	4.53729e-22
	HORVU3Hr1G088190	2.71722	6.95422e-22
	HORVU3Hr1G016320	-1.82348	2.42351e-21
	HORVU5Hr1G107410	2.99106	7.25548e-21
	HORVU5Hr1G020880	2.45671	1.12179e-20
	HORVU4Hr1G054470	-3.03642	1.46815e-20
	HORVU4Hr1G076850	-1.84624	2.50469e-20
	HORVU1Hr1G049210	1.82616	4.05458e-20
	HORVU4Hr1G077300	2.7891	7.88485e-20
	HORVU3Hr1G117370	4.29436	1.97525e-19
	HORVU3Hr1G095700	2.75597	1.12087e-18
	HORVU5Hr1G065620	2.04457	3.79082e-18
	HORVU6Hr1G080360	2.43031	3.79082e-18
	HORVU3Hr1G024210	2.07301	4.10538e-18
	HORVU1Hr1G088510	-2.2926	4.72545e-18
	HORVU1Hr1G094490	-1.68272	4.72545e-18
	HORVU7Hr1G103330	2.04798	5.49509e-18
	HORVU3Hr1G108750	2.35603	5.88226e-18
	HORVU1Hr1G025940	-1.61772	5.88226e-18
	HORVU6Hr1G025830	-1.58225	2.36986e-17
	HORVU5Hr1G103420	3.10529	4.65697e-17
	HORVU2Hr1G026820	3.27369	1.30618e-16
	HORVU7Hr1G036780	1.76232	1.60319e-16
	HORVU3Hr1G001590	-3.87525	1.88889e-16
	HORVU0Hr1G012940	1.29414	1.99005e-16
	HORVU3Hr1G115990	2.03869	2.63439e-16
	HORVU4Hr1G057000	1.49493	4.05576e-16
	HORVU1Hr1G002100	1.84095	6.37918e-16
	HORVU5Hr1G080820	-2.37272	1.59333e-15
	HORVU3Hr1G093140	3.22959	1.88061e-15
	HORVU5Hr1G080090	3.68213	2.60899e-15
	HORVU7Hr1G091350	2.57083	2.64543e-15
	HORVU5Hr1G104800	2.30198	3.15636e-15
	HORVU3Hr1G087310	-3.32805	4.55366e-15
	HORVU3Hr1G093350	3.28941	4.86149e-15
	HORVU2Hr1G116800	-1.76939	1.23159e-14
	HORVU4Hr1G054480	-1.59239	1.35095e-14
	HORVU0Hr1G022370	4.02271	1.38814e-14
	HORVU3Hr1G020520	2.34051	1.68796e-14
	HORVU2Hr1G102100	3.70146	1.97903e-14
	HORVU2Hr1G105090	-1.67851	1.98741e-14
	HORVU5Hr1G084700	-1.40637	2.39672e-14
	HORVU6Hr1G079700	2.14732	2.71629e-14
	HORVU4Hr1G085250	1.47067	2.72842e-14
	HORVU4Hr1G080810	1.58807	3.71907e-14
	HORVU1Hr1G065600	2.2899	4.76032e-14
	HORVU6Hr1G091840	3.66943	5.06474e-14
	HORVU7Hr1G037350	-1.64364	7.17255e-14
	HORVU5Hr1G013640	-2.85376	7.87073e-14
	HORVU2Hr1G067750	2.05675	8.04245e-14
	HORVU5Hr1G104580	2.36069	9.92258e-14
	HORVU2Hr1G022250	1.38825	1.82159e-13
	HORVU2Hr1G066080	-1.2801	1.82159e-13
	HORVU3Hr1G027240	1.83106	4.94654e-13
	HORVU6Hr1G056570	3.64015	6.54552e-13
	HORVU6Hr1G071920	4.14041	1.0959e-12
	HORVU2Hr1G104150	4.40751	1.15612e-12
	HORVU6Hr1G087220	3.59729	1.16875e-12
	HORVU2Hr1G005170	3.23756	1.56235e-12
	HORVU6Hr1G079600	3.53501	1.82074e-12
	HORVU2Hr1G080460	1.37742	2.74539e-12
	HORVU5Hr1G080860	2.66921	2.76073e-12
	HORVU5Hr1G027980	2.78346	2.91137e-12
	HORVU5Hr1G094300	1.45392	4.08066e-12
	HORVU2Hr1G093960	-2.15339	4.74008e-12
	HORVU2Hr1G082740	3.69538	7.28046e-12
	HORVU2Hr1G057700	2.16911	7.98255e-12
	HORVU7Hr1G096690	2.04758	1.02021e-11
	HORVU3Hr1G020490	2.47887	1.0555e-11
	HORVU3Hr1G018740	3.80629	1.13506e-11
	HORVU2Hr1G104080	2.84264	1.38015e-11
	HORVU4Hr1G015670	1.95981	1.39286e-11
	HORVU2Hr1G109960	2.13651	1.57723e-11
	HORVU5Hr1G119550	2.7674	1.60055e-11
	HORVU6Hr1G063480	1.69057	1.83358e-11
	HORVU6Hr1G026200	1.6364	2.67436e-11
	HORVU3Hr1G117580	1.70092	2.8687e-11
	HORVU5Hr1G013590	-2.44507	3.55484e-11
	HORVU3Hr1G065630	-1.4606	3.58736e-11
	HORVU1Hr1G048700	-1.56295	4.51129e-11
	HORVU6Hr1G088960	1.63298	4.6504e-11
	HORVU1Hr1G083180	2.64542	4.81409e-11
	HORVU5Hr1G118420	4.21802	5.05774e-11
	HORVU3Hr1G097810	3.1027	5.84886e-11
	HORVU2Hr1G083430	-1.59309	6.51278e-11
	HORVU7Hr1G103170	1.18081	7.33575e-11
	HORVU6Hr1G055960	1.40835	8.0096e-11
	HORVU5Hr1G098360	-1.85495	8.54984e-11
	HORVU2Hr1G117940	2.12156	8.57166e-11
	HORVU6Hr1G034730	2.23758	8.95622e-11
	HORVU5Hr1G050990	1.74691	1.03295e-10
	HORVU4Hr1G008420	3.45777	1.14413e-10
	HORVU5Hr1G102900	3.43197	1.169e-10
	HORVU2Hr1G078570	2.99942	1.1836e-10
	HORVU3Hr1G065610	-1.53352	1.70711e-10
	HORVU2Hr1G094230	-1.6242	1.90466e-10
	HORVU0Hr1G016780	-1.33276	2.37056e-10
	HORVU4Hr1G085590	1.84488	2.52009e-10
	HORVU1Hr1G024170	-1.17691	2.62652e-10
	HORVU2Hr1G038040	-2.17916	2.90219e-10
	HORVU1Hr1G069830	3.31264	3.03086e-10
	HORVU1Hr1G063310	1.20198	3.44508e-10
	HORVU5Hr1G001750	2.2105	3.63046e-10
	HORVU5Hr1G047150	2.10849	3.79418e-10
	HORVU2Hr1G024150	1.36956	4.44397e-10
	HORVU1Hr1G047430	-2.066	5.1259e-10
	HORVU7Hr1G088140	-1.29142	5.65817e-10
	HORVU7Hr1G035440	-1.96235	6.44921e-10
	HORVU5Hr1G066260	1.3779	7.79672e-10
	HORVU2Hr1G107100	1.93264	8.22604e-10
	HORVU1Hr1G067110	-1.31053	1.05742e-09
	HORVU4Hr1G076760	2.3498	1.1768e-09
	HORVU7Hr1G035480	-2.55005	1.26699e-09
	HORVU2Hr1G102050	1.9754	1.30201e-09
	HORVU0Hr1G016430	1.10548	1.43413e-09
	HORVU1Hr1G049100	2.95313	1.49528e-09
	HORVU2Hr1G045970	1.20951	1.49955e-09
	HORVU7Hr1G037910	-1.39134	1.52277e-09
	HORVU7Hr1G093080	-1.38496	1.54477e-09
	HORVU2Hr1G047010	1.90588	1.55571e-09
	HORVU3Hr1G035470	1.45166	1.65228e-09
	HORVU3Hr1G091360	2.1807	1.65228e-09
	HORVU2Hr1G088650	3.71089	1.74433e-09
	HORVU6Hr1G040040	1.49324	1.74433e-09
	HORVU7Hr1G053930	3.80812	1.82716e-09
	HORVU2Hr1G124310	3.39179	1.84236e-09
	HORVU5Hr1G063620	2.7193	1.87792e-09
	HORVU7Hr1G054530	3.77141	1.91025e-09
	HORVU2Hr1G103180	1.29098	2.06749e-09
	HORVU5Hr1G082420	1.70909	2.3949e-09
	HORVU1Hr1G001420	-3.4173	2.47778e-09
	HORVU1Hr1G093760	2.86798	2.47778e-09
	HORVU4Hr1G050510	-1.75408	2.6883e-09
	HORVU5Hr1G072760	-1.65314	3.04523e-09
	HORVU7Hr1G088510	2.50452	3.10952e-09
	HORVU3Hr1G006450	2.79155	3.29265e-09
	HORVU3Hr1G117650	3.19559	3.65731e-09
	HORVU6Hr1G026280	1.24115	3.92829e-09
	HORVU3Hr1G070690	2.34943	4.14968e-09
	HORVU1Hr1G057540	1.88401	4.42569e-09
	HORVU3Hr1G037780	1.93655	4.67911e-09
	HORVU3Hr1G087320	-1.74247	5.39469e-09
	HORVU6Hr1G008640	2.53592	5.60039e-09
	HORVU7Hr1G022230	-1.46655	5.67073e-09
	HORVU6Hr1G026260	1.49201	5.7306e-09
	HORVU4Hr1G075410	-1.00658	6.94839e-09
	HORVU2Hr1G007570	2.33462	7.00081e-09
	HORVU5Hr1G115100	1.53035	8.2414e-09
	HORVU6Hr1G071150	3.51169	8.89427e-09
	HORVU6Hr1G001150	-2.68617	9.20711e-09
	HORVU5Hr1G080450	-2.06937	9.63729e-09
	HORVU4Hr1G009800	-2.16947	9.84233e-09
	HORVU3Hr1G086500	3.01877	1.01482e-08
	HORVU2Hr1G018430	-1.47759	1.15741e-08
	HORVU7Hr1G072670	1.95494	1.19643e-08
	HORVU1Hr1G018350	1.7775	1.37481e-08
	HORVU3Hr1G080500	3.22398	1.38568e-08
	HORVU7Hr1G040590	-1.64546	1.47236e-08
	HORVU7Hr1G085130	1.85655	1.47236e-08
	HORVU5Hr1G110180	2.50047	1.48486e-08
	HORVU5Hr1G060730	-1.12397	1.49358e-08
	HORVU5Hr1G001180	3.1856	1.51804e-08
	HORVU2Hr1G118080	2.39216	1.53816e-08
	HORVU6Hr1G085170	1.80798	1.55884e-08
	HORVU1Hr1G086450	1.39048	1.7706e-08
	HORVU3Hr1G003860	3.19252	1.88003e-08
	HORVU1Hr1G037270	1.63208	2.04227e-08
	HORVU5Hr1G117830	3.00406	2.05023e-08
	HORVU6Hr1G057680	-1.1862	2.12624e-08
	HORVU4Hr1G076970	2.58713	2.35386e-08
	HORVU5Hr1G069090	1.967	2.3997e-08
	HORVU5Hr1G068450	-1.71331	2.50493e-08
	HORVU3Hr1G095620	1.97514	2.6364e-08
	HORVU1Hr1G017660	-1.65616	2.8942e-08
	HORVU0Hr1G002410	-1.70532	2.98033e-08
	HORVU6Hr1G089540	1.55805	3.13384e-08
	HORVU0Hr1G003890	2.24443	3.1657e-08
	HORVU6Hr1G021700	1.99217	3.34077e-08
	HORVU5Hr1G062290	-1.1099	3.38338e-08
	HORVU3Hr1G026920	1.84567	3.75474e-08
	HORVU3Hr1G117390	3.44898	4.0085e-08
	HORVU4Hr1G079710	1.26409	4.2784e-08
	HORVU5Hr1G075370	-1.82287	4.40275e-08
	HORVU5Hr1G104740	3.33743	4.47257e-08
	HORVU1Hr1G083210	3.42164	4.51934e-08
	HORVU7Hr1G095230	1.3526	5.20729e-08
	HORVU4Hr1G050120	3.72943	5.27081e-08
	HORVU1Hr1G048950	1.84861	5.27081e-08
	HORVU6Hr1G068980	2.33962	5.42719e-08
	HORVU6Hr1G000720	2.06247	5.50682e-08
	HORVU3Hr1G006940	1.35858	6.26747e-08
	HORVU4Hr1G057170	1.2503	6.37188e-08
	HORVU1Hr1G079270	1.43788	6.37188e-08
	HORVU1Hr1G059020	2.10972	6.44044e-08
	HORVU0Hr1G029600	-1.69359	6.48823e-08
	HORVU4Hr1G016190	2.1092	6.50127e-08
	HORVU3Hr1G020390	1.5236	7.39983e-08
	HORVU4Hr1G056070	2.1979	7.39983e-08
	HORVU4Hr1G018100	2.91993	7.44986e-08
	HORVU6Hr1G077780	-2.01786	7.51569e-08
	HORVU5Hr1G118060	-2.08721	7.8717e-08
	HORVU5Hr1G097940	-1.00202	8.39565e-08
	HORVU6Hr1G093520	1.85349	8.39565e-08
	HORVU2Hr1G102110	3.19006	8.7162e-08
	HORVU3Hr1G111600	1.69484	9.29068e-08
	HORVU4Hr1G083070	1.84828	1.02441e-07
	HORVU4Hr1G088860	2.01516	1.02441e-07
	HORVU2Hr1G094780	-2.41268	1.19713e-07
	HORVU7Hr1G093580	1.16843	1.20767e-07
	HORVU1Hr1G076800	1.54429	1.21034e-07
	HORVU7Hr1G015740	1.9702	1.26376e-07
	HORVU3Hr1G056100	-1.86166	1.35051e-07
	HORVU4Hr1G056210	-1.41869	1.50551e-07
	HORVU3Hr1G058100	-2.01304	1.51974e-07
	HORVU5Hr1G092960	1.23842	1.52015e-07
	HORVU2Hr1G017300	-1.08283	1.55511e-07
	HORVU5Hr1G074810	1.58501	1.70086e-07
	HORVU6Hr1G077790	-1.98306	1.71374e-07
	HORVU2Hr1G078840	1.1889	1.76616e-07
	HORVU5Hr1G051010	1.55342	1.81366e-07
	HORVU7Hr1G078670	1.50102	1.81366e-07
	HORVU1Hr1G005150	-3.3127	1.82397e-07
	HORVU3Hr1G061930	1.17989	1.85468e-07
	HORVU0Hr1G026700	1.61015	1.8646e-07
	HORVU2Hr1G099470	3.32206	1.88294e-07
	HORVU2Hr1G118100	2.02269	1.9863e-07
	HORVU3Hr1G117590	2.02548	2.14005e-07
	HORVU7Hr1G041260	-1.66746	2.42576e-07
	HORVU5Hr1G078950	0.978504	2.45562e-07
	HORVU6Hr1G077750	-1.34309	2.51232e-07
	HORVU1Hr1G055420	-1.24328	2.56608e-07
	HORVU2Hr1G101980	1.18109	2.72858e-07
	HORVU4Hr1G015170	2.7277	2.75636e-07
	HORVU1Hr1G079030	-1.6295	2.88821e-07
	HORVU6Hr1G001160	1.90098	3.0326e-07
	HORVU5Hr1G072650	1.70744	3.0775e-07
	HORVU4Hr1G087840	2.17152	3.32215e-07
	HORVU2Hr1G036280	-1.03007	3.34231e-07
	HORVU7Hr1G107310	2.11782	3.47888e-07
	HORVU1Hr1G049070	1.83355	3.52279e-07
	HORVU3Hr1G000690	-2.06491	4.11394e-07
	HORVU5Hr1G110220	3.01579	4.12451e-07
	HORVU7Hr1G041230	-1.8245	4.32579e-07
	HORVU7Hr1G114700	-1.48154	4.39265e-07
	HORVU4Hr1G067430	2.86172	4.41338e-07
	HORVU1Hr1G049270	1.55139	4.44466e-07
	HORVU2Hr1G099770	-1.19795	4.51548e-07
	HORVU3Hr1G080440	1.74484	4.74466e-07
	HORVU7Hr1G036070	2.08587	4.84502e-07
	HORVU1Hr1G082470	-1.87579	5.00411e-07
	HORVU7Hr1G029460	3.44294	5.74808e-07
	HORVU7Hr1G105620	-1.42689	5.85529e-07
	HORVU3Hr1G113620	1.89193	6.03345e-07
	HORVU5Hr1G021610	3.22368	6.91341e-07
	HORVU3Hr1G091480	1.33299	7.48843e-07
	HORVU7Hr1G049470	1.02716	7.5559e-07
	HORVU1Hr1G088620	3.19627	7.60042e-07
	HORVU7Hr1G088670	1.78788	7.6334e-07
	HORVU2Hr1G019820	1.5313	7.70335e-07
	HORVU2Hr1G018190	1.34082	8.37634e-07
	HORVU3Hr1G075070	-1.84626	8.42452e-07
	HORVU5Hr1G112060	1.85067	8.69476e-07
	HORVU1Hr1G090890	2.42962	8.86995e-07
	HORVU3Hr1G019440	-1.18325	8.96481e-07
	HORVU7Hr1G084290	1.46741	9.55276e-07
	HORVU3Hr1G065640	-1.43935	9.8319e-07
	HORVU1Hr1G092250	3.2193	1.03225e-06
	HORVU2Hr1G107480	3.02095	1.05208e-06
	HORVU5Hr1G073970	-1.21703	1.06016e-06
	HORVU1Hr1G062480	1.30971	1.10548e-06
	HORVU4Hr1G014590	2.80286	1.13549e-06
	HORVU7Hr1G077370	2.85943	1.15863e-06
	HORVU5Hr1G034830	-1.69153	1.19109e-06
	HORVU5Hr1G103430	1.92801	1.27137e-06
	HORVU7Hr1G003490	2.29818	1.31211e-06
	HORVU1Hr1G066530	1.65794	1.31211e-06
	HORVU2Hr1G028340	1.17616	1.35239e-06
	HORVU6Hr1G076510	1.53889	1.38538e-06
	HORVU3Hr1G047220	1.28835	1.38823e-06
	HORVU6Hr1G081570	2.14684	1.4897e-06
	HORVU5Hr1G018830	1.20553	1.50803e-06
	HORVU7Hr1G012310	1.41002	1.52149e-06
	HORVU3Hr1G052880	1.51894	1.63788e-06
	HORVU4Hr1G019570	2.29194	1.71255e-06
	HORVU4Hr1G087780	2.45768	1.77769e-06
	HORVU1Hr1G092300	3.07041	1.81626e-06
	HORVU4Hr1G060760	2.65554	1.8746e-06
	HORVU5Hr1G011780	2.41236	1.89191e-06
	HORVU2Hr1G036510	1.00549	2.03905e-06
	HORVU6Hr1G069570	0.955656	2.03905e-06
	HORVU7Hr1G014870	1.79257	2.16539e-06
	HORVU5Hr1G122950	3.22968	2.21441e-06
	HORVU4Hr1G009380	-1.0501	2.5633e-06
	HORVU5Hr1G080420	-2.02282	2.62033e-06
	HORVU7Hr1G091250	1.7266	2.62033e-06
	HORVU1Hr1G055140	-1.05754	2.62112e-06
	HORVU5Hr1G042030	-1.35627	2.66179e-06
	HORVU1Hr1G044080	-1.28245	2.82624e-06
	HORVU1Hr1G078280	-2.428	2.87875e-06
	HORVU5Hr1G097150	1.26721	2.90667e-06
	HORVU1Hr1G049280	1.61432	2.90667e-06
	HORVU3Hr1G056980	-2.12868	2.98901e-06
	HORVU1Hr1G089730	3.22832	3.07676e-06
	HORVU6Hr1G067920	3.02726	3.10837e-06
	HORVU4Hr1G000050	2.63938	3.51742e-06
	HORVU3Hr1G082460	2.07992	3.56345e-06
	HORVU0Hr1G009390	2.44772	3.74264e-06
	HORVU5Hr1G011540	3.08913	4.07017e-06
	HORVU3Hr1G000150	-1.26365	4.20915e-06
	HORVU2Hr1G029270	1.67146	4.32364e-06
	HORVU2Hr1G090690	-1.39093	4.73015e-06
	HORVU5Hr1G062510	2.80602	4.89653e-06
	HORVU7Hr1G091080	3.22957	4.89653e-06
	HORVU7Hr1G113850	-1.37954	5.11879e-06
	HORVU1Hr1G092630	2.57284	5.24133e-06
	HORVU3Hr1G071220	-1.4585	5.46597e-06
	HORVU3Hr1G065420	2.79556	5.56533e-06
	HORVU5Hr1G006880	-0.990847	5.56533e-06
	HORVU4Hr1G063350	2.05329	5.6212e-06
	HORVU2Hr1G102130	1.21522	5.68757e-06
	HORVU2Hr1G068090	1.65068	5.73708e-06
	HORVU3Hr1G065620	-1.11034	5.83902e-06
	HORVU3Hr1G095670	1.66673	6.06334e-06
	HORVU3Hr1G070340	-1.27282	6.08817e-06
	HORVU2Hr1G019270	1.37075	6.35953e-06
	HORVU1Hr1G019770	-1.71225	6.49658e-06
	HORVU3Hr1G092020	-1.03738	6.53276e-06
	HORVU1Hr1G053070	0.973014	6.86273e-06
	HORVU5Hr1G122060	1.48137	7.00456e-06
	HORVU4Hr1G003590	-1.62963	7.46613e-06
	HORVU2Hr1G035440	-1.20195	7.46757e-06
	HORVU6Hr1G058290	1.79632	7.58775e-06
	HORVU3Hr1G074380	-1.20064	7.64088e-06
	HORVU3Hr1G056090	1.49955	7.71723e-06
	HORVU2Hr1G093670	-1.00558	7.9028e-06
	HORVU7Hr1G026570	2.85186	7.98356e-06
	HORVU2Hr1G087010	-1.01107	8.10848e-06
	HORVU3Hr1G074940	3.07265	8.33826e-06
	HORVU7Hr1G002110	1.4985	9.36026e-06
	HORVU4Hr1G054770	-0.965864	1.07865e-05
	HORVU1Hr1G063390	1.56701	1.07865e-05
	HORVU7Hr1G041300	-1.33039	1.15046e-05
	HORVU6Hr1G016200	1.93951	1.17926e-05
	HORVU3Hr1G022260	-1.03575	1.18361e-05
	HORVU3Hr1G020240	-2.05428	1.1848e-05
	HORVU3Hr1G097770	2.32001	1.20498e-05
	HORVU3Hr1G064370	-1.1227	1.23459e-05
	HORVU3Hr1G007420	-1.22616	1.27542e-05
	HORVU7Hr1G091910	1.98438	1.29439e-05
	HORVU4Hr1G008550	2.11965	1.29439e-05
	HORVU2Hr1G122470	2.19656	1.29915e-05
	HORVU6Hr1G000940	2.22397	1.31805e-05
	HORVU3Hr1G019750	0.959396	1.35977e-05
	HORVU6Hr1G078820	1.40095	1.35977e-05
	HORVU4Hr1G054210	1.24564	1.37157e-05
	HORVU1Hr1G082310	-1.81028	1.38962e-05
	HORVU5Hr1G069880	2.97069	1.3958e-05
	HORVU3Hr1G090350	1.4532	1.41763e-05
	HORVU1Hr1G079450	3.00174	1.45534e-05
	HORVU7Hr1G101580	-0.927333	1.49648e-05
	HORVU7Hr1G083530	2.70681	1.53184e-05
	HORVU4Hr1G000810	2.21198	1.58999e-05
	HORVU6Hr1G015500	-0.859228	1.63115e-05
	HORVU6Hr1G074060	2.53833	1.64123e-05
	HORVU3Hr1G083680	-0.958178	1.66288e-05
	HORVU7Hr1G107400	1.94546	1.67734e-05
	HORVU2Hr1G110230	2.49601	1.69386e-05
	HORVU1Hr1G079290	2.65599	1.76606e-05
	HORVU2Hr1G065120	1.84295	1.78141e-05
	HORVU2Hr1G015980	1.69224	1.78577e-05
	HORVU6Hr1G075900	1.90515	1.82319e-05
	HORVU7Hr1G113830	-1.38116	1.85939e-05
	HORVU6Hr1G022680	-1.16467	1.903e-05
	HORVU6Hr1G081140	1.42613	1.94874e-05
	HORVU2Hr1G068200	0.814116	1.96834e-05
	HORVU5Hr1G093960	-1.11012	2.09128e-05
	HORVU0Hr1G018280	-2.16042	2.09128e-05
	HORVU0Hr1G008950	1.33681	2.10424e-05
	HORVU3Hr1G023230	2.13527	2.13907e-05
	HORVU3Hr1G059030	2.84025	2.13907e-05
	HORVU1Hr1G092290	3.07762	2.23674e-05
	HORVU7Hr1G046280	1.08926	2.31809e-05
	HORVU6Hr1G018050	1.57063	2.36402e-05
	HORVU4Hr1G083820	-0.957788	2.39052e-05
	HORVU4Hr1G010770	-1.06982	2.45071e-05
	HORVU4Hr1G087800	3.09912	2.45794e-05
	HORVU5Hr1G027240	-1.48406	2.64189e-05
	HORVU3Hr1G024590	1.40881	2.68363e-05
	HORVU1Hr1G002160	2.58305	2.70853e-05
	HORVU6Hr1G058780	1.12603	2.72897e-05
	HORVU3Hr1G005800	-0.972608	2.76595e-05
	HORVU1Hr1G062080	0.86009	2.76595e-05
	HORVU7Hr1G106960	1.87932	2.80593e-05
	HORVU4Hr1G007190	2.15552	2.80593e-05
	HORVU1Hr1G068030	-0.7716	2.86689e-05
	HORVU2Hr1G025980	1.14383	2.87018e-05
	HORVU7Hr1G053260	-1.45544	2.91224e-05
	HORVU5Hr1G080150	1.16357	3.07845e-05
	HORVU4Hr1G059260	2.59102	3.30622e-05
	HORVU4Hr1G020710	1.37815	3.31356e-05
	HORVU2Hr1G041080	-0.926019	3.35695e-05
	HORVU3Hr1G015740	1.23029	3.49802e-05
	HORVU3Hr1G067860	-0.983632	3.51504e-05
	HORVU7Hr1G118560	1.10979	3.61304e-05
	HORVU4Hr1G076420	2.40814	3.61304e-05
	HORVU2Hr1G021920	2.73473	3.64022e-05
	HORVU1Hr1G047570	1.33513	3.66333e-05
	HORVU5Hr1G094490	2.53733	3.72209e-05
	HORVU2Hr1G065330	1.53292	3.74842e-05
	HORVU7Hr1G050710	-1.80404	3.81037e-05
	HORVU7Hr1G093050	-0.958031	3.82502e-05
	HORVU3Hr1G019430	-1.09729	3.84295e-05
	HORVU6Hr1G077860	2.16311	3.84295e-05
	HORVU7Hr1G087490	1.53854	3.85035e-05
	HORVU5Hr1G018720	2.5798	3.8539e-05
	HORVU5Hr1G111290	1.47458	3.8729e-05
	HORVU2Hr1G040780	1.50418	3.88637e-05
	HORVU5Hr1G113810	0.942805	3.88637e-05
	HORVU5Hr1G043700	1.79032	3.92349e-05
	HORVU7Hr1G049240	1.71992	3.97723e-05
	HORVU1Hr1G026590	1.03825	4.00315e-05
	HORVU5Hr1G042740	1.4597	4.10215e-05
	HORVU2Hr1G110120	-0.831294	4.11943e-05
	HORVU2Hr1G034610	2.57441	4.15748e-05
	HORVU4Hr1G043650	2.16301	4.15748e-05
	HORVU1Hr1G094290	-1.3355	4.24595e-05
	HORVU3Hr1G069730	1.97706	4.27105e-05
	HORVU2Hr1G102710	1.79051	4.37054e-05
	HORVU1Hr1G070690	1.632	4.49565e-05
	HORVU1Hr1G074790	-2.25672	4.5455e-05
	HORVU4Hr1G075520	-1.89613	4.54667e-05
	HORVU3Hr1G091320	-1.02681	4.55415e-05
	HORVU3Hr1G011360	-2.83011	4.62676e-05
	HORVU5Hr1G088140	1.06851	4.62676e-05
	HORVU7Hr1G098220	1.86569	4.62676e-05
	HORVU7Hr1G121570	-1.69509	4.64478e-05
	HORVU4Hr1G019490	2.22703	4.99764e-05
	HORVU6Hr1G090000	1.25386	5.02299e-05
	HORVU3Hr1G071830	-1.04851	5.04282e-05
	HORVU4Hr1G072340	-1.73653	5.04282e-05
	HORVU6Hr1G088580	1.45071	5.1596e-05
	HORVU3Hr1G077890	1.80357	5.16075e-05
	HORVU7Hr1G111310	2.40933	5.28168e-05
	HORVU2Hr1G116730	-1.03769	5.37071e-05
	HORVU2Hr1G108780	-1.29498	5.40905e-05
	HORVU6Hr1G064770	1.48725	5.56057e-05
	HORVU4Hr1G068960	1.26389	5.71411e-05
	HORVU5Hr1G036590	1.08182	5.74171e-05
	HORVU1Hr1G002950	-1.32865	5.76092e-05
	HORVU5Hr1G053930	-1.31964	5.81171e-05
	HORVU5Hr1G006630	1.17502	5.81336e-05
	HORVU2Hr1G106040	-1.2846	6.0069e-05
	HORVU3Hr1G108630	-1.12642	6.0414e-05
	HORVU1Hr1G003810	-1.19779	6.13851e-05
	HORVU6Hr1G000830	1.54017	6.21286e-05
	HORVU4Hr1G065900	1.52864	6.29646e-05
	HORVU6Hr1G009000	2.66577	6.39064e-05
	HORVU4Hr1G000830	1.43399	6.68764e-05
	HORVU3Hr1G080430	1.83149	6.69235e-05
	HORVU1Hr1G082100	1.26212	6.69235e-05
	HORVU2Hr1G099450	2.05004	6.70656e-05
	HORVU4Hr1G000950	1.45006	6.74408e-05
	HORVU3Hr1G078380	2.93391	6.96774e-05
	HORVU6Hr1G021060	2.5585	6.97863e-05
	HORVU1Hr1G064210	-0.677661	7.14424e-05
	HORVU3Hr1G001060	1.73663	7.44682e-05
	HORVU7Hr1G009680	2.12181	7.45275e-05
	HORVU1Hr1G020800	2.8782	7.46698e-05
	HORVU3Hr1G117570	2.04131	7.71604e-05
	HORVU4Hr1G060720	1.48865	7.82715e-05
	HORVU7Hr1G027010	-0.920723	7.90665e-05
	HORVU1Hr1G015810	2.36155	7.90665e-05
	HORVU1Hr1G057680	1.89097	7.90665e-05
	HORVU6Hr1G077610	-1.21579	7.94996e-05
	HORVU2Hr1G078510	-1.11611	7.98407e-05
	HORVU2Hr1G094960	1.59171	8.01651e-05
	HORVU1Hr1G038810	-1.36703	8.02576e-05
	HORVU4Hr1G077850	1.51092	8.24603e-05
	HORVU4Hr1G087630	-0.817024	8.36172e-05
	HORVU7Hr1G089240	-1.33061	8.38655e-05
	HORVU3Hr1G082030	1.42748	8.40174e-05
	HORVU7Hr1G054710	1.91519	8.40174e-05
	HORVU7Hr1G101740	-0.839172	8.4171e-05
	HORVU5Hr1G034340	2.54352	8.57753e-05
	HORVU2Hr1G106190	1.85058	8.64452e-05
	HORVU3Hr1G004920	-2.03813	8.85032e-05
	HORVU7Hr1G000150	-1.06669	9.08566e-05
	HORVU3Hr1G082070	1.10836	9.09249e-05
	HORVU7Hr1G035400	2.03487	9.09249e-05
	HORVU6Hr1G053250	1.09162	9.42924e-05
	HORVU4Hr1G025180	-1.2602	9.65177e-05
	HORVU1Hr1G023220	1.04702	9.6956e-05
	HORVU2Hr1G092100	1.80339	9.70949e-05
	HORVU1Hr1G069800	1.37814	9.78303e-05
	HORVU6Hr1G000440	-0.920487	9.83443e-05
	HORVU5Hr1G056130	-1.33444	0.000100537
	HORVU5Hr1G097060	-0.799486	0.000101084
	HORVU5Hr1G112820	-1.26611	0.000101784
	HORVU4Hr1G028720	-1.7676	0.000103869
	HORVU4Hr1G090190	2.08088	0.000105995
	HORVU6Hr1G088800	-0.763146	0.000105995
	HORVU1Hr1G012170	-2.86732	0.000106597
	HORVU6Hr1G000960	1.76696	0.000109567
	HORVU2Hr1G006690	1.31074	0.000110808
	HORVU5Hr1G124450	2.134	0.000111642
	HORVU4Hr1G078130	0.885545	0.000111642
	HORVU2Hr1G078790	1.28949	0.000116174
	HORVU3Hr1G097390	-2.21553	0.000117216
	HORVU3Hr1G013840	1.24806	0.000117476
	HORVU1Hr1G008810	1.00807	0.000119054
	HORVU7Hr1G051420	-1.49655	0.000120094
	HORVU4Hr1G026160	1.41296	0.000121943
	HORVU3Hr1G112520	2.19252	0.000124383
	HORVU2Hr1G007070	2.02106	0.000125304
	HORVU7Hr1G093120	1.08594	0.000126513
	HORVU1Hr1G000990	-2.64378	0.000127553
	HORVU6Hr1G011860	1.29625	0.000127697
	HORVU5Hr1G110000	1.63742	0.000131345
	HORVU2Hr1G071880	0.676618	0.000131691
	HORVU7Hr1G029750	1.57484	0.000131691
	HORVU1Hr1G012090	-2.33921	0.000142114
	HORVU3Hr1G095730	2.27516	0.000147661
	HORVU5Hr1G084750	2.30009	0.000147661
	HORVU6Hr1G075840	2.61957	0.000147661
	HORVU4Hr1G013330	1.51997	0.000151063
	HORVU6Hr1G063020	-1.81156	0.000152981
	HORVU2Hr1G120150	2.11143	0.000155888
	HORVU7Hr1G041500	-1.03481	0.000160287
	HORVU5Hr1G039900	2.38766	0.000161201
	HORVU3Hr1G020140	2.46303	0.000162879
	HORVU2Hr1G116780	-2.00649	0.00016424
	HORVU4Hr1G027900	2.10267	0.000166115
	HORVU3Hr1G048610	0.824054	0.000170562
	HORVU2Hr1G017270	1.72539	0.000171775
	HORVU2Hr1G116830	-1.88787	0.000171983
	HORVU3Hr1G108950	2.06561	0.000173116
	HORVU2Hr1G105140	-1.39514	0.000173623
	HORVU1Hr1G001120	-2.69512	0.000176293
	HORVU5Hr1G060620	1.04913	0.000177279
	HORVU2Hr1G098140	2.73538	0.000178747
	HORVU1Hr1G072720	0.857063	0.000178747
	HORVU6Hr1G028220	-1.45582	0.000182078
	HORVU3Hr1G078620	-0.972734	0.000182487
	HORVU5Hr1G020900	1.73882	0.000187754
	HORVU1Hr1G000680	-2.53375	0.000191498
	HORVU4Hr1G053250	1.69265	0.000195139
	HORVU1Hr1G002170	2.40049	0.000195139
	HORVU3Hr1G021150	1.21558	0.000199302
	HORVU1Hr1G064530	0.926537	0.000200555
	HORVU2Hr1G090410	1.48878	0.000204585
	HORVU4Hr1G076200	2.4429	0.000206555
	HORVU7Hr1G034070	2.45163	0.000209236
	HORVU0Hr1G002390	-1.79518	0.000212579
	HORVU0Hr1G017160	-1.25138	0.000215573
	HORVU2Hr1G086050	-0.897923	0.000217374
	HORVU3Hr1G021810	1.2473	0.000219457
	HORVU4Hr1G033760	1.30743	0.000223375
	HORVU2Hr1G045480	1.79048	0.000223383
	HORVU1Hr1G013970	1.67909	0.000229925
	HORVU2Hr1G077710	2.32006	0.000232452
	HORVU2Hr1G083490	-1.06521	0.000232452
	HORVU7Hr1G115410	-1.43851	0.000237403
	HORVU5Hr1G008180	1.80498	0.000238287
	HORVU7Hr1G013470	-1.71582	0.000243566
	HORVU1Hr1G027700	2.06711	0.000245587
	HORVU1Hr1G021160	1.94024	0.000246802
	HORVU2Hr1G105930	1.99278	0.00025113
	HORVU1Hr1G009250	2.41322	0.000253979
	HORVU1Hr1G057410	-1.07705	0.000254061
	HORVU3Hr1G071570	-0.782945	0.000256322
	HORVU3Hr1G055980	-1.50895	0.000258459
	HORVU1Hr1G077230	-1.64732	0.000260036
	HORVU5Hr1G081090	1.02849	0.000262992
	HORVU0Hr1G007260	-1.82166	0.000263449
	HORVU3Hr1G113210	1.92913	0.000269534
	HORVU1Hr1G001910	0.725894	0.000271655
	HORVU4Hr1G022280	1.77473	0.000278551
	HORVU6Hr1G095380	2.65806	0.000291075
	HORVU2Hr1G039070	-0.881476	0.000297747
	HORVU7Hr1G056770	0.739657	0.000298444
	HORVU5Hr1G061820	-1.98337	0.000298682
	HORVU5Hr1G125560	2.39506	0.000307354
	HORVU4Hr1G090860	1.69145	0.000310827
	HORVU2Hr1G084640	-1.193	0.00032163
	HORVU2Hr1G073210	2.70032	0.00032205
	HORVU0Hr1G009470	1.7091	0.000323545
	HORVU3Hr1G015540	1.17617	0.000324438
	HORVU3Hr1G030950	2.72103	0.000325331
	HORVU6Hr1G029540	1.01547	0.000326784
	HORVU1Hr1G018360	0.890606	0.000326784
	HORVU4Hr1G070950	2.25265	0.000327498
	HORVU5Hr1G099200	1.23721	0.00032756
	HORVU3Hr1G004140	2.34236	0.000328268
	HORVU4Hr1G051790	0.983236	0.000331822
	HORVU1Hr1G017380	-1.12736	0.000333705
	HORVU2Hr1G014150	1.66567	0.000339443
	HORVU3Hr1G106810	2.4167	0.00034137
	HORVU5Hr1G065630	1.85634	0.00034305
	HORVU4Hr1G000700	2.25409	0.000345269
	HORVU7Hr1G094870	2.06829	0.000345643
	HORVU2Hr1G020310	2.29821	0.000347615
	HORVU4Hr1G011740	0.89517	0.000347828
	HORVU3Hr1G084210	2.52161	0.000349177
	HORVU2Hr1G116090	1.2408	0.00035209
	HORVU2Hr1G011490	2.60374	0.000356657
	HORVU2Hr1G083090	-1.05697	0.000356893
	HORVU3Hr1G090970	0.868707	0.00035975
	HORVU3Hr1G106850	1.69665	0.00035975
	HORVU6Hr1G029750	-1.72706	0.000361014
	HORVU1Hr1G078860	-1.75206	0.000364904
	HORVU1Hr1G071180	2.58158	0.000369053
	HORVU5Hr1G043600	1.23093	0.000369735
	HORVU1Hr1G026850	-1.52533	0.000379034
	HORVU2Hr1G035020	-1.08488	0.000380039
	HORVU2Hr1G040530	-1.72052	0.000383147
	HORVU7Hr1G035020	1.94135	0.000383147
	HORVU6Hr1G081350	2.19689	0.000384
	HORVU3Hr1G114800	1.45093	0.000390206
	HORVU6Hr1G089600	1.49431	0.000390206
	HORVU2Hr1G052650	-0.655423	0.000392687
	HORVU0Hr1G018970	2.45956	0.000396039
	HORVU4Hr1G084930	1.44406	0.0004016
	HORVU3Hr1G021190	-0.916074	0.000408708
	HORVU3Hr1G114250	0.793828	0.000419718
	HORVU0Hr1G016130	1.95191	0.000425797
	HORVU1Hr1G044040	-1.48336	0.000426378
	HORVU7Hr1G100230	1.37248	0.000427612
	HORVU6Hr1G065430	-1.17471	0.000427612
	HORVU4Hr1G072370	-1.74789	0.000436031
	HORVU2Hr1G073370	1.39241	0.00044623
	HORVU7Hr1G079030	1.21526	0.00044623
	HORVU3Hr1G018680	1.83347	0.00045296
	HORVU4Hr1G082040	2.53677	0.000454079
	HORVU6Hr1G016480	2.64408	0.000464377
	HORVU4Hr1G012700	2.67399	0.000465481
	HORVU7Hr1G087700	1.15609	0.000467818
	HORVU4Hr1G057550	1.51399	0.00047086
	HORVU2Hr1G005320	1.2659	0.000483343
	HORVU3Hr1G020880	-0.82144	0.000493401
	HORVU1Hr1G055930	-0.845688	0.000493401
	HORVU4Hr1G065520	0.817796	0.000499116
	HORVU7Hr1G040480	1.95975	0.000502141
	HORVU1Hr1G073170	1.03533	0.000504095
	HORVU6Hr1G018710	0.936298	0.000513565
	HORVU5Hr1G062620	-1.20034	0.000514011
	HORVU5Hr1G093660	-1.08829	0.000518687
	HORVU2Hr1G040680	2.09514	0.00051991
	HORVU6Hr1G035300	1.33507	0.000524813
	HORVU2Hr1G105010	-1.35875	0.000525938
	HORVU3Hr1G025270	1.12672	0.000526604
	HORVU2Hr1G107760	1.61443	0.000526905
	HORVU1Hr1G080300	2.55847	0.000533142
	HORVU7Hr1G098540	-1.00261	0.000538313
	HORVU4Hr1G044140	2.44425	0.000538566
	HORVU4Hr1G022270	1.90324	0.000542007
	HORVU5Hr1G106440	-0.715312	0.000548814
	HORVU7Hr1G117640	1.21517	0.000553742
	HORVU1Hr1G067460	0.765162	0.000553742
	HORVU3Hr1G098820	2.30382	0.000555721
	HORVU5Hr1G072770	-1.17239	0.000558757
	HORVU4Hr1G023430	-0.911295	0.000564128
	HORVU0Hr1G015890	1.40196	0.000565596
	HORVU3Hr1G035680	1.60097	0.000565716
	HORVU4Hr1G012750	1.79572	0.000565716
	HORVU1Hr1G056570	2.40674	0.000565716
	HORVU5Hr1G046140	-1.80332	0.000573973
	HORVU7Hr1G033170	1.35561	0.000573973
	HORVU3Hr1G063280	1.42089	0.000574389
	HORVU3Hr1G091800	2.63776	0.000574766
	HORVU7Hr1G096800	-2.30542	0.000574766
	HORVU6Hr1G056110	0.982234	0.000574766
	HORVU6Hr1G073520	1.83269	0.000577122
	HORVU5Hr1G095630	2.31315	0.000579279
	HORVU7Hr1G035740	-1.59768	0.000598239
	HORVU4Hr1G073730	1.37278	0.000598239
	HORVU7Hr1G116890	1.69894	0.000601273
	HORVU7Hr1G007800	1.87218	0.000607135
	HORVU5Hr1G021070	2.54531	0.000608291
	HORVU5Hr1G063660	1.952	0.000611352
	HORVU6Hr1G078510	-1.42876	0.000615214
	HORVU3Hr1G109160	1.66983	0.000617145
	HORVU3Hr1G026890	2.02457	0.000620309
	HORVU7Hr1G106790	-1.61436	0.000629622
	HORVU6Hr1G060850	-1.4067	0.000635223
	HORVU1Hr1G017120	-0.685246	0.000645231
	HORVU2Hr1G027080	-1.30053	0.000662454
	HORVU3Hr1G004050	2.39588	0.000687139
	HORVU4Hr1G005810	-1.63037	0.00069013
	HORVU3Hr1G004360	1.07421	0.000695532
	HORVU6Hr1G051560	1.11607	0.000704486
	HORVU7Hr1G060480	1.13923	0.000707036
	HORVU7Hr1G050240	1.38459	0.000725537
	HORVU2Hr1G101140	-1.34343	0.000727235
	HORVU4Hr1G088670	-1.42929	0.000728327
	HORVU0Hr1G019300	1.96851	0.000730933
	HORVU2Hr1G108290	2.03015	0.00073095
	HORVU5Hr1G065740	2.56939	0.000749581
	HORVU6Hr1G036920	-1.08281	0.000750449
	HORVU5Hr1G077650	-2.20781	0.00075274
	HORVU0Hr1G022310	-0.777958	0.000769918
	HORVU1Hr1G083300	-1.02621	0.000785361
	HORVU7Hr1G013170	2.5647	0.000791097
	HORVU0Hr1G021950	-0.774717	0.000809364
	HORVU1Hr1G093390	-0.928367	0.000811876
	HORVU5Hr1G094590	1.47227	0.000817859
	HORVU7Hr1G024220	-0.948596	0.000818215
	HORVU7Hr1G040860	1.36046	0.000819336
	HORVU0Hr1G005490	-1.59427	0.000823355
	HORVU2Hr1G113070	2.24125	0.000846643
	HORVU4Hr1G088340	1.208	0.000848074
	HORVU5Hr1G044640	1.46306	0.000852971
	HORVU1Hr1G010940	2.3589	0.000854202
	HORVU2Hr1G022080	2.22274	0.000856957
	HORVU5Hr1G012790	1.70655	0.000860659
	HORVU7Hr1G049580	2.12782	0.000865394
	HORVU2Hr1G119110	1.60362	0.000872454
	HORVU5Hr1G065420	-1.12605	0.000893214
	HORVU6Hr1G067300	-0.768172	0.000925316
	HORVU5Hr1G098720	-0.797857	0.000943763
	HORVU7Hr1G020190	1.88999	0.000943763
	HORVU1Hr1G070840	-2.21432	0.000943763
	HORVU3Hr1G084360	2.51403	0.000945788
	HORVU1Hr1G005280	2.49899	0.000953168
	HORVU7Hr1G038330	-0.892296	0.000957232
	HORVU0Hr1G020420	1.01293	0.0009593
	HORVU3Hr1G066500	-1.83921	0.000976693
	HORVU7Hr1G102150	-0.890251	0.000984133
	HORVU3Hr1G010620	1.0073	0.00100693
	HORVU5Hr1G081610	1.92358	0.00100714
	HORVU6Hr1G076130	-1.01897	0.00101825
	HORVU5Hr1G122820	1.1285	0.00102985
	HORVU7Hr1G101920	1.47532	0.00104125
	HORVU0Hr1G009400	1.65191	0.0010416
	HORVU2Hr1G001820	-1.90109	0.0010693
	HORVU3Hr1G116310	1.9833	0.00107015
	HORVU3Hr1G063640	-1.50208	0.00107231
	HORVU7Hr1G071530	1.99538	0.00110401
	HORVU3Hr1G007970	-1.38314	0.00111294
	HORVU5Hr1G100140	1.41963	0.0011154
	HORVU1Hr1G094710	1.99019	0.0011203
	HORVU3Hr1G108330	-1.10547	0.00112229
	HORVU3Hr1G023780	1.09587	0.00112311
	HORVU7Hr1G000900	1.39291	0.00113254
	HORVU7Hr1G077970	-0.806567	0.00113254
	HORVU1Hr1G079730	-1.04401	0.00113898
	HORVU3Hr1G085460	1.41416	0.00114312
	HORVU2Hr1G006180	0.965566	0.00114954
	HORVU3Hr1G085780	1.77231	0.00114954
	HORVU5Hr1G082500	-1.82601	0.00114954
	HORVU4Hr1G011910	1.27065	0.00114954
	HORVU6Hr1G020380	1.72494	0.00114954
	HORVU3Hr1G056960	1.30016	0.00115349
	HORVU5Hr1G020430	1.44435	0.0011577
	HORVU7Hr1G084140	1.98725	0.00115865
	HORVU7Hr1G083990	0.852901	0.00117291
	HORVU2Hr1G116740	-0.939004	0.00118443
	HORVU1Hr1G022660	2.33768	0.00118755
	HORVU1Hr1G075580	-1.02583	0.00119636
	HORVU4Hr1G051610	1.38765	0.00119859
	HORVU7Hr1G051150	1.05029	0.00119965
	HORVU3Hr1G083740	-1.07173	0.00121606
	HORVU2Hr1G016440	1.15092	0.00122549
	HORVU5Hr1G077670	-1.79775	0.00122549
	HORVU1Hr1G078710	-1.12718	0.00122549
	HORVU7Hr1G107670	2.19207	0.00123469
	HORVU6Hr1G031640	1.06483	0.00125571
	HORVU3Hr1G099770	1.57364	0.00125672
	HORVU6Hr1G054910	-0.878503	0.00125672
	HORVU1Hr1G083740	-1.31285	0.0012762
	HORVU7Hr1G044160	2.46059	0.00128163
	HORVU4Hr1G082140	1.07854	0.0012822
	HORVU5Hr1G006910	-2.3383	0.00128372
	HORVU3Hr1G071210	-0.983865	0.00128641
	HORVU1Hr1G040720	1.58349	0.00129215
	HORVU2Hr1G105190	-1.2207	0.00129912
	HORVU2Hr1G099410	0.868807	0.00130054
	HORVU2Hr1G038940	1.94225	0.00131102
	HORVU5Hr1G113630	0.879433	0.00131272
	HORVU5Hr1G048300	1.13813	0.00131624
	HORVU5Hr1G014310	0.978195	0.00131927
	HORVU4Hr1G000850	1.32216	0.001324
	HORVU2Hr1G113060	1.69345	0.00134407
	HORVU5Hr1G098290	-1.85186	0.00135645
	HORVU1Hr1G016980	0.769711	0.00135645
	HORVU2Hr1G073330	-1.07008	0.00138727
	HORVU6Hr1G093570	-0.766995	0.00138827
	HORVU1Hr1G085260	2.37613	0.00138827
	HORVU5Hr1G098190	0.842338	0.00139003
	HORVU1Hr1G074260	-1.17017	0.00139631
	HORVU4Hr1G078950	1.09257	0.00141988
	HORVU6Hr1G039660	0.868684	0.00142107
	HORVU0Hr1G003850	1.56172	0.00143356
	HORVU3Hr1G080860	-1.80124	0.00143967
	HORVU5Hr1G112610	1.62382	0.00143967
	HORVU7Hr1G042160	1.45303	0.0014439
	HORVU4Hr1G044040	0.981555	0.00146178
	HORVU0Hr1G032410	-1.51832	0.00146178
	HORVU5Hr1G109710	1.48507	0.00146462
	HORVU1Hr1G018370	0.709601	0.00147511
	HORVU1Hr1G060490	0.888187	0.00148287
	HORVU6Hr1G077120	1.87416	0.00149161
	HORVU1Hr1G026330	-0.959155	0.00152325
	HORVU3Hr1G016890	1.83767	0.00152345
	HORVU2Hr1G112580	1.94742	0.00153427
	HORVU3Hr1G032440	2.14948	0.00153799
	HORVU1Hr1G000700	-2.44166	0.00154708
	HORVU7Hr1G090560	2.08999	0.00156086
	HORVU5Hr1G052770	1.48928	0.00156891
	HORVU1Hr1G056820	-1.45616	0.00158418
	HORVU3Hr1G038290	-1.04186	0.00158622
	HORVU4Hr1G053940	1.3946	0.00159568
	HORVU3Hr1G019840	1.15957	0.00160603
	HORVU7Hr1G116400	-0.755861	0.00160603
	HORVU4Hr1G046610	1.39604	0.00160861
	HORVU3Hr1G079540	-1.27015	0.00161316
	HORVU4Hr1G025840	0.69563	0.00161316
	HORVU2Hr1G071890	2.39622	0.00162656
	HORVU3Hr1G058810	-1.00091	0.00163997
	HORVU2Hr1G085270	1.84764	0.00164268
	HORVU1Hr1G063420	1.62648	0.00164268
	HORVU3Hr1G059720	1.4187	0.00164594
	HORVU7Hr1G038570	2.29542	0.00165794
	HORVU2Hr1G110110	-0.689698	0.00166094
	HORVU2Hr1G041610	1.69159	0.00166355
	HORVU5Hr1G031470	0.850412	0.00166405
	HORVU2Hr1G087090	1.89675	0.00169868
	HORVU5Hr1G059410	0.921173	0.00172774
	HORVU3Hr1G025030	-1.75341	0.0017285
	HORVU7Hr1G093630	-1.35622	0.0017285
	HORVU3Hr1G058150	1.49996	0.00172897
	HORVU3Hr1G112010	1.29734	0.00174244
	HORVU3Hr1G112040	1.45844	0.00174244
	HORVU4Hr1G070610	2.18941	0.00174244
	HORVU2Hr1G044510	1.08109	0.00178112
	HORVU5Hr1G108610	-1.10304	0.00178831
	HORVU1Hr1G089830	1.49966	0.00179607
	HORVU7Hr1G046830	1.00203	0.00181643
	HORVU2Hr1G019730	0.802956	0.0018275
	HORVU5Hr1G104680	1.52512	0.00183399
	HORVU7Hr1G002140	1.45	0.0018374
	HORVU3Hr1G067760	1.5371	0.00184155
	HORVU3Hr1G100350	1.42324	0.00187222
	HORVU1Hr1G047010	-1.17467	0.00188751
	HORVU5Hr1G066720	1.43534	0.00190875
	HORVU1Hr1G091340	-1.28094	0.00190875
	HORVU5Hr1G049440	0.817264	0.00194491
	HORVU6Hr1G003900	0.923255	0.00194491
	HORVU5Hr1G098310	-1.37407	0.00195312
	HORVU6Hr1G011120	1.09947	0.0019837
	ENSRNA049460237	-1.43071	0.0020048
	HORVU7Hr1G120120	-0.810741	0.00201367
	HORVU5Hr1G093150	0.83635	0.00202465
	HORVU4Hr1G090820	1.50809	0.00203079
	HORVU1Hr1G071500	-1.3204	0.00203699
	HORVU0Hr1G000840	2.30291	0.00203699
	HORVU2Hr1G113300	1.72243	0.00205226
	HORVU7Hr1G036130	1.8682	0.00205905
	HORVU6Hr1G025270	-0.800678	0.00206274
	HORVU5Hr1G111280	1.70161	0.0020646
	HORVU5Hr1G105810	-0.661046	0.00206547
	HORVU6Hr1G084070	1.83195	0.00206556
	HORVU4Hr1G082700	1.70835	0.00207514
	HORVU6Hr1G076530	1.8726	0.00207863
	HORVU3Hr1G075160	0.932345	0.00208437
	HORVU7Hr1G012600	-1.28878	0.00208437
	HORVU1Hr1G038890	-0.559234	0.00208437
	HORVU7Hr1G113290	1.66017	0.00210106
	HORVU3Hr1G078490	2.4085	0.00212533
	HORVU2Hr1G064170	1.13126	0.00213489
	HORVU2Hr1G118010	2.41728	0.00213489
	HORVU7Hr1G108830	2.24767	0.00214286
	HORVU6Hr1G084310	2.13451	0.00214737
	HORVU7Hr1G092380	-1.34154	0.00215632
	HORVU1Hr1G056340	2.08598	0.00215632
	HORVU2Hr1G063460	1.37462	0.00216904
	HORVU6Hr1G060440	1.63328	0.0021705
	HORVU2Hr1G091400	1.76165	0.00217359
	HORVU3Hr1G069970	0.813116	0.00217617
	HORVU3Hr1G104940	1.78235	0.00217617
	HORVU5Hr1G050120	1.47785	0.00220166
	HORVU3Hr1G038000	0.968928	0.00221608
	HORVU3Hr1G087470	0.846395	0.00221746
	HORVU4Hr1G002600	2.17818	0.00223933
	HORVU5Hr1G068060	1.68382	0.00225408
	HORVU3Hr1G038700	1.44925	0.00227766
	HORVU7Hr1G027810	1.56824	0.00229284
	HORVU1Hr1G046630	1.62236	0.00231698
	HORVU3Hr1G089290	1.12599	0.00232256
	HORVU1Hr1G047390	0.716398	0.00233681
	HORVU5Hr1G107290	1.03864	0.00233966
	HORVU4Hr1G090850	1.70047	0.00234289
	HORVU3Hr1G071320	1.31213	0.00235734
	HORVU3Hr1G033910	-1.39368	0.00238536
	HORVU5Hr1G088130	1.16111	0.00239002
	HORVU6Hr1G067870	-0.591571	0.00239529
	HORVU3Hr1G028810	1.02246	0.00240915
	HORVU3Hr1G114920	1.63362	0.00241006
	HORVU3Hr1G083500	-0.859665	0.00247706
	HORVU4Hr1G080780	-0.608827	0.00248607
	HORVU3Hr1G072260	1.42094	0.00250365
	HORVU4Hr1G010650	-0.667776	0.00252157
	HORVU6Hr1G019870	1.72772	0.00252413
	HORVU1Hr1G021140	0.731164	0.00252413
	HORVU2Hr1G090730	-0.759704	0.00254662
	HORVU3Hr1G038190	0.976117	0.00255492
	HORVU6Hr1G080690	0.811966	0.00256779
	HORVU3Hr1G089510	-0.745147	0.00257152
	HORVU6Hr1G077770	-0.815295	0.00258862
	HORVU2Hr1G094380	0.792283	0.0025959
	HORVU7Hr1G119200	2.16627	0.00263268
	HORVU2Hr1G045200	0.703612	0.00263305
	HORVU3Hr1G071120	1.35628	0.00264909
	HORVU4Hr1G016810	0.673502	0.00264909
	HORVU2Hr1G021350	0.938387	0.00265059
	HORVU2Hr1G075010	1.20366	0.00265059
	HORVU1Hr1G065440	1.35229	0.00265059
	HORVU3Hr1G063630	-1.64004	0.0026551
	HORVU4Hr1G011250	-0.897526	0.00266284
	HORVU1Hr1G052890	-0.799851	0.00266736
	HORVU3Hr1G016900	2.25581	0.00268567
	HORVU2Hr1G121060	0.994754	0.00268673
	HORVU3Hr1G024660	2.2977	0.00270935
	HORVU5Hr1G112930	-0.751595	0.00271622
	HORVU3Hr1G016990	1.33342	0.00274356
	HORVU7Hr1G098440	-1.29911	0.00276437
	HORVU2Hr1G079220	1.08066	0.00278403
	HORVU5Hr1G082890	0.89985	0.00278403
	HORVU5Hr1G118800	1.98517	0.00278403
	HORVU7Hr1G027480	1.03648	0.00278403
	HORVU1Hr1G015660	-0.634101	0.00278403
	HORVU5Hr1G081820	1.06377	0.00282268
	HORVU3Hr1G001450	0.788159	0.00282658
	HORVU5Hr1G091840	0.966534	0.00283093
	HORVU5Hr1G059140	1.06519	0.00285123
	HORVU1Hr1G016630	0.921435	0.00286223
	HORVU2Hr1G115640	-1.36435	0.00286254
	HORVU1Hr1G083920	1.73116	0.00287473
	HORVU7Hr1G116060	1.55287	0.00288825
	HORVU3Hr1G081860	1.18002	0.00292091
	HORVU7Hr1G111600	0.672149	0.00292091
	HORVU4Hr1G075090	-0.940909	0.00293
	HORVU4Hr1G069990	-0.727908	0.00294445
	HORVU2Hr1G124300	1.65162	0.00295416
	HORVU5Hr1G113900	1.23215	0.00295416
	HORVU7Hr1G120450	2.32442	0.00301652
	HORVU5Hr1G074030	1.07288	0.00304349
	HORVU1Hr1G062110	0.649908	0.00304732
	HORVU5Hr1G083170	-0.801751	0.00306713
	HORVU5Hr1G096240	2.32186	0.00306888
	HORVU1Hr1G075520	1.24485	0.00309293
	HORVU3Hr1G017610	1.67192	0.00312126
	HORVU7Hr1G065420	0.955363	0.00312235
	HORVU1Hr1G051050	-1.60108	0.00317094
	HORVU2Hr1G083170	0.730481	0.00318811
	HORVU3Hr1G043250	2.00667	0.00321859
	HORVU1Hr1G049190	0.983282	0.00322152
	HORVU2Hr1G087510	-1.53381	0.0032234
	HORVU2Hr1G004230	1.02006	0.00322953
	HORVU6Hr1G085850	2.32481	0.00322953
	HORVU1Hr1G084630	-1.42909	0.00324216
	HORVU3Hr1G019720	1.59119	0.00324523
	HORVU4Hr1G085970	1.11421	0.00325025
	HORVU5Hr1G112440	1.04423	0.00325437
	HORVU7Hr1G051650	-1.05216	0.00325437
	HORVU4Hr1G078400	-1.09991	0.00328728
	HORVU1Hr1G093890	0.819372	0.00328728
	HORVU7Hr1G101310	2.13986	0.00329557
	HORVU2Hr1G105690	1.47117	0.00330034
	HORVU0Hr1G022270	1.06955	0.00334013
	HORVU3Hr1G074100	1.87054	0.00335404
	HORVU3Hr1G095240	0.9292	0.00336913
	HORVU7Hr1G040130	1.05507	0.00338722
	HORVU2Hr1G030130	1.14237	0.00338905
	HORVU5Hr1G054820	-1.3461	0.00338905
	HORVU0Hr1G022260	1.47248	0.00338905
	HORVU2Hr1G063480	1.36279	0.00339718
	HORVU5Hr1G045990	1.30152	0.00339905
	HORVU2Hr1G124880	-0.856663	0.00340081
	HORVU5Hr1G123120	1.40729	0.00344264
	HORVU2Hr1G066100	-1.22595	0.00346616
	HORVU2Hr1G026910	-1.73231	0.00349182
	HORVU4Hr1G024290	1.18428	0.00349182
	HORVU5Hr1G000520	1.66824	0.0035083
	HORVU7Hr1G030160	1.05279	0.00351302
	HORVU2Hr1G043840	0.878898	0.0035359
	HORVU5Hr1G057730	1.31645	0.00355943
	HORVU5Hr1G120780	1.92525	0.00357183
	HORVU2Hr1G118360	1.17435	0.00360515
	HORVU7Hr1G089910	0.955247	0.00367897
	HORVU6Hr1G077930	1.72905	0.00367897
	HORVU7Hr1G008830	2.10258	0.00369127
	HORVU5Hr1G051970	2.04011	0.00369666
	HORVU7Hr1G095930	1.09819	0.00369666
	HORVU6Hr1G089280	-0.679283	0.00370141
	HORVU2Hr1G115750	1.17992	0.0037112
	HORVU3Hr1G011710	1.94793	0.0037112
	HORVU5Hr1G098090	-0.788805	0.00373781
	HORVU6Hr1G005400	2.25804	0.00373928
	HORVU7Hr1G086010	1.65847	0.00379462
	HORVU5Hr1G122170	-0.760001	0.00380427
	HORVU1Hr1G068170	-0.662973	0.00380427
	HORVU7Hr1G083440	2.29235	0.00386095
	HORVU4Hr1G005270	1.17736	0.00386956
	HORVU7Hr1G099580	-1.55364	0.00389006
	HORVU3Hr1G091120	1.53416	0.00390586
	HORVU4Hr1G066140	-1.06704	0.00392044
	HORVU2Hr1G027040	0.867779	0.00394378
	HORVU4Hr1G090130	2.07906	0.00394527
	HORVU1Hr1G000440	2.02131	0.00396823
	HORVU2Hr1G115890	2.25981	0.00398352
	HORVU0Hr1G022350	2.24628	0.00398352
	HORVU3Hr1G115940	-0.756458	0.004007
	HORVU2Hr1G085280	1.73613	0.00401273
	HORVU7Hr1G007540	1.62292	0.00404521
	HORVU5Hr1G040310	1.56522	0.00405087
	HORVU4Hr1G076820	-0.940743	0.00405658
	HORVU3Hr1G020800	1.40554	0.0040649
	HORVU1Hr1G028920	1.57397	0.0040649
	HORVU1Hr1G038210	0.856284	0.00406797
	HORVU1Hr1G079280	1.55559	0.00407983
	HORVU6Hr1G091690	-0.726114	0.00409019
	HORVU6Hr1G036800	2.27512	0.00411698
	HORVU5Hr1G038920	-0.64619	0.00412654
	HORVU2Hr1G036080	-0.827793	0.00413569
	HORVU5Hr1G106250	2.28986	0.00413569
	HORVU6Hr1G032400	2.13392	0.00413569
	HORVU4Hr1G087740	-0.951821	0.00416159
	HORVU0Hr1G013900	2.13122	0.00416323
	HORVU6Hr1G060720	1.30452	0.00416621
	HORVU5Hr1G005180	1.93093	0.00416915
	HORVU3Hr1G001040	-0.879735	0.00417687
	HORVU4Hr1G008440	-1.48237	0.00423969
	HORVU5Hr1G106010	1.90044	0.00424465
	HORVU1Hr1G019380	1.87117	0.00424465
	HORVU7Hr1G077270	2.25901	0.0042533
	HORVU1Hr1G029180	-1.06654	0.0042533
	HORVU5Hr1G106500	-1.51879	0.00428351
	HORVU5Hr1G088620	0.953254	0.00430634
	HORVU1Hr1G002840	-0.726075	0.00430679
	HORVU3Hr1G097400	-1.69103	0.00431314
	HORVU5Hr1G066130	2.20607	0.00431417
	HORVU3Hr1G113430	-1.32197	0.00432209
	HORVU3Hr1G000620	-1.86093	0.0043529
	HORVU6Hr1G074940	-0.832528	0.0043529
	HORVU3Hr1G085720	1.4978	0.00435497
	HORVU6Hr1G031590	0.604622	0.0044007
	HORVU6Hr1G028820	1.02128	0.00443307
	HORVU3Hr1G067280	-1.43866	0.0044577
	HORVU4Hr1G069400	0.974122	0.004478
	HORVU1Hr1G028900	1.36896	0.00449208
	HORVU4Hr1G086540	-0.799795	0.00450517
	HORVU3Hr1G059700	0.881111	0.00451918
	HORVU6Hr1G013670	-1.0365	0.00453138
	HORVU4Hr1G000620	1.77692	0.00454757
	HORVU3Hr1G073560	1.12606	0.00456323
	HORVU5Hr1G056350	-0.989712	0.00456323
	HORVU7Hr1G057330	-0.969253	0.00456323
	HORVU7Hr1G099320	1.30577	0.00456571
	HORVU5Hr1G085800	-1.0868	0.00457012
	HORVU7Hr1G007580	-1.2805	0.00457012
	HORVU3Hr1G000090	-0.666482	0.00457545
	HORVU6Hr1G021160	-0.837987	0.00461471
	HORVU5Hr1G073680	1.3834	0.00463689
	HORVU5Hr1G007260	2.18495	0.00465528
	HORVU5Hr1G052240	-0.571224	0.00465535
	HORVU3Hr1G074680	0.825763	0.00472831
	HORVU7Hr1G052960	-0.55893	0.00472831
	HORVU2Hr1G036960	1.19388	0.00472844
	HORVU3Hr1G081180	0.674219	0.00473422
	HORVU3Hr1G028020	1.31812	0.00473479
	HORVU3Hr1G068120	1.15775	0.00473733
	HORVU4Hr1G084920	0.802359	0.00481056
	HORVU0Hr1G017000	-0.898201	0.00481673
	HORVU5Hr1G011940	-1.39762	0.00482602
	HORVU4Hr1G040290	1.14825	0.00484381
	HORVU3Hr1G095750	-0.711541	0.00487659
	HORVU7Hr1G075170	0.948312	0.00488281
	HORVU3Hr1G053620	0.571426	0.00489092
	HORVU6Hr1G034380	-0.73868	0.00489509
	HORVU3Hr1G007590	1.77153	0.00491701
	HORVU1Hr1G072590	-1.02761	0.00492462
	HORVU3Hr1G060730	1.78077	0.00495142
	HORVU7Hr1G030120	-0.972896	0.0049618
	HORVU5Hr1G083100	-1.18159	0.00496269
	HORVU7Hr1G042120	1.61806	0.00497425
	HORVU4Hr1G056120	-0.879891	0.00499819
	HORVU5Hr1G000010	-0.648178	0.00501323
	HORVU3Hr1G110440	2.11264	0.00501778
	HORVU2Hr1G005330	1.60435	0.00506279
	HORVU1Hr1G051150	-0.675359	0.00506279
	HORVU2Hr1G002500	-0.765185	0.0050841
	HORVU5Hr1G041030	1.04979	0.0050841
	HORVU4Hr1G015260	1.16049	0.0050841
	HORVU6Hr1G037140	-0.998896	0.00509285
	HORVU6Hr1G038700	1.33506	0.0051204
	HORVU7Hr1G036570	1.45116	0.00516347
	HORVU1Hr1G017480	0.889401	0.00518212
	HORVU1Hr1G088560	-1.03014	0.00521408
	HORVU2Hr1G081460	1.05022	0.005227
	HORVU2Hr1G089970	-0.542148	0.00523321
	HORVU3Hr1G034980	1.98094	0.00525089
	HORVU6Hr1G057080	1.46019	0.00525359
	HORVU4Hr1G053900	-0.56151	0.00526377
	HORVU6Hr1G028150	2.16138	0.00527212
	HORVU3Hr1G013810	1.34135	0.00527735
	HORVU3Hr1G110560	1.03514	0.00527735
	HORVU3Hr1G019320	-0.747703	0.00527744
	HORVU6Hr1G061280	-1.1024	0.00528947
	HORVU7Hr1G098510	0.998668	0.00530495
	HORVU1Hr1G064950	1.06493	0.0053057
	ENSRNA049488630	-2.19958	0.00531904
	HORVU5Hr1G069110	1.14	0.00534237
	HORVU5Hr1G080790	-1.08137	0.00536003
	HORVU7Hr1G059460	-0.68216	0.00536577
	HORVU6Hr1G059500	-1.56936	0.00536712
	HORVU0Hr1G022290	2.23689	0.00536712
	HORVU3Hr1G013270	1.53874	0.005373
	HORVU4Hr1G054910	-1.11817	0.00539685
	HORVU7Hr1G094240	0.789621	0.00544171
	HORVU4Hr1G010940	1.99343	0.00544171
	HORVU2Hr1G082480	1.52555	0.00545427
	HORVU3Hr1G068140	2.23276	0.00547097
	HORVU0Hr1G001490	1.44367	0.00551626
	HORVU6Hr1G031700	1.82663	0.00556057
	HORVU7Hr1G106420	1.72432	0.00556378
	HORVU7Hr1G019400	2.16975	0.00560963
	HORVU6Hr1G001960	-1.42574	0.00563396
	HORVU5Hr1G079910	1.87736	0.00563508
	HORVU0Hr1G016480	-1.37002	0.00563966
	HORVU5Hr1G076690	-0.94565	0.00564457
	HORVU2Hr1G044450	2.00126	0.00566318
	HORVU5Hr1G120570	1.33004	0.00567043
	HORVU6Hr1G031580	-0.987524	0.00571475
	HORVU2Hr1G027480	-0.614653	0.00574351
	HORVU5Hr1G077790	1.28302	0.00575048
	HORVU6Hr1G088400	2.21297	0.00577992
	HORVU7Hr1G107210	1.35752	0.00581629
	HORVU7Hr1G020580	2.22077	0.00582349
	HORVU4Hr1G082600	1.11556	0.00582349
	HORVU0Hr1G010810	1.48475	0.00582349
	HORVU2Hr1G089210	-1.45696	0.00582956
	HORVU7Hr1G084240	2.21526	0.00582962
	HORVU5Hr1G084860	1.22245	0.00588577
	HORVU7Hr1G036540	1.47374	0.00590483
	HORVU0Hr1G024200	2.11684	0.00590483
	HORVU7Hr1G020660	-0.898783	0.00593125
	HORVU4Hr1G062440	1.50084	0.00593253
	HORVU2Hr1G026890	-1.23667	0.00593283
	HORVU5Hr1G011650	1.20069	0.0059566
	HORVU3Hr1G089380	1.95773	0.00597059
	HORVU7Hr1G082710	1.41278	0.00597059
	HORVU7Hr1G093210	2.17144	0.00597059
	HORVU2Hr1G030610	1.0603	0.00600335
	HORVU4Hr1G090020	2.05977	0.00600449
	HORVU3Hr1G030340	1.09529	0.00604553
	HORVU6Hr1G035040	-0.828668	0.00605626
	HORVU3Hr1G091790	2.20475	0.00605987
	HORVU5Hr1G020800	1.62988	0.00607739
	HORVU6Hr1G018770	0.827164	0.00607739
	HORVU5Hr1G006280	1.20972	0.00608829
	HORVU5Hr1G053840	1.22111	0.00608829
	HORVU2Hr1G022780	-0.91569	0.0061058
	HORVU2Hr1G084910	1.19773	0.00614599
	HORVU2Hr1G109120	-0.590893	0.00614599
	HORVU5Hr1G078080	0.884501	0.00614599
	HORVU4Hr1G013150	1.21894	0.00614599
	HORVU6Hr1G059930	2.2034	0.00615054
	HORVU2Hr1G108580	2.06821	0.00617928
	HORVU3Hr1G085270	1.76965	0.00619518
	HORVU7Hr1G037420	-0.964249	0.00620915
	HORVU2Hr1G075230	1.26439	0.00621666
	HORVU7Hr1G117550	-0.845623	0.00621666
	HORVU2Hr1G022160	2.20467	0.00621697
	HORVU3Hr1G097010	2.16683	0.0062178
	HORVU4Hr1G008870	-1.01566	0.00627602
	HORVU1Hr1G049840	1.80686	0.00633539
	HORVU5Hr1G074300	1.61137	0.00633645
	HORVU2Hr1G079920	1.30956	0.00638685
	HORVU0Hr1G000780	1.12356	0.00641794
	HORVU2Hr1G032970	0.97324	0.00643617
	HORVU6Hr1G054600	-0.727188	0.00643617
	HORVU7Hr1G028240	1.43605	0.00645146
	HORVU4Hr1G076040	-1.50415	0.00651737
	HORVU2Hr1G083680	1.07739	0.00652112
	HORVU2Hr1G108480	1.38851	0.00656811
	HORVU2Hr1G105740	2.17656	0.00663903
	HORVU3Hr1G056110	0.849237	0.00667198
	HORVU7Hr1G008820	1.98201	0.00667198
	HORVU7Hr1G039570	-1.39316	0.00667198
	HORVU1Hr1G002410	-0.827883	0.0066951
	HORVU1Hr1G075110	-0.832573	0.0067572
	HORVU1Hr1G051020	1.24299	0.00677733
	HORVU6Hr1G086770	-1.14392	0.00683492
	HORVU3Hr1G061080	-0.67732	0.00689466
	HORVU5Hr1G056100	2.00451	0.00697885
	ENSRNA049481631	-1.96321	0.00705457
	HORVU3Hr1G113120	1.25095	0.00708513
	HORVU7Hr1G043690	1.70324	0.0071081
	HORVU4Hr1G085090	1.3198	0.00713513
	HORVU7Hr1G091520	1.05484	0.00717636
	HORVU2Hr1G017240	2.00823	0.00718514
	HORVU6Hr1G050750	-1.22752	0.00720125
	HORVU5Hr1G098220	1.33248	0.0072544
	HORVU1Hr1G055470	-1.18173	0.00728745
	HORVU1Hr1G001950	0.913593	0.00729953
	HORVU3Hr1G097460	-1.82662	0.0073399
	HORVU5Hr1G030460	1.15556	0.00734267
	HORVU6Hr1G020540	2.13076	0.00735084
	HORVU3Hr1G058670	-1.25244	0.00736828
	HORVU5Hr1G087980	1.66426	0.00737336
	HORVU1Hr1G037760	-1.02317	0.00737336
	HORVU5Hr1G111850	1.16761	0.00737413
	HORVU2Hr1G107350	-1.20575	0.00739176
	HORVU5Hr1G093460	1.19052	0.00739833
	HORVU2Hr1G037700	-0.945835	0.00740781
	HORVU3Hr1G089420	-1.49449	0.00740781
	HORVU1Hr1G081210	1.68813	0.00741618
	HORVU4Hr1G008980	1.77905	0.00743069
	HORVU4Hr1G011790	-0.837276	0.00744437
	HORVU7Hr1G039180	-1.28108	0.00748038
	HORVU7Hr1G019390	2.00692	0.00748224
	HORVU4Hr1G020080	-0.668454	0.00751929
	HORVU1Hr1G053440	-1.20288	0.00751929
	HORVU1Hr1G059090	-0.78417	0.00752276
	HORVU1Hr1G066830	2.16583	0.00754609
	HORVU5Hr1G087560	-1.2568	0.00756014
	HORVU7Hr1G027670	0.650199	0.00756014
	HORVU3Hr1G076670	-1.1909	0.00758245
	HORVU2Hr1G104030	1.21332	0.00761182
	HORVU0Hr1G000050	1.99044	0.00762787
	HORVU6Hr1G057170	1.17253	0.00764657
	HORVU3Hr1G072730	-0.947148	0.00765851
	HORVU7Hr1G097270	2.02826	0.00765851
	HORVU3Hr1G087570	1.10145	0.00766425
	HORVU3Hr1G093980	1.08055	0.0076708
	HORVU3Hr1G092520	1.87823	0.0077102
	HORVU3Hr1G096210	-1.11965	0.0077102
	HORVU0Hr1G002480	2.15211	0.00771828
	HORVU5Hr1G070800	-0.738054	0.00774322
	HORVU4Hr1G045980	-0.630784	0.00774322
	HORVU4Hr1G065800	0.650553	0.00777286
	HORVU4Hr1G003040	-1.018	0.00777358
	HORVU5Hr1G009180	-2.15063	0.00780751
	HORVU5Hr1G012740	-1.22336	0.00780876
	HORVU3Hr1G117890	1.27796	0.00782762
	HORVU4Hr1G020770	0.964426	0.00783921
	HORVU6Hr1G075270	1.83104	0.00796444
	HORVU1Hr1G088300	1.69153	0.00804093
	HORVU0Hr1G005160	1.36989	0.00804093
	HORVU5Hr1G009350	-1.31517	0.00805637
	HORVU4Hr1G016010	1.94604	0.00811886
	HORVU5Hr1G092100	1.87241	0.00814885
	HORVU5Hr1G021730	-0.737371	0.00816753
	HORVU0Hr1G009420	1.8738	0.00818387
	HORVU7Hr1G115810	1.8735	0.00819931
	HORVU2Hr1G029480	-0.840483	0.00821409
	HORVU2Hr1G083700	1.53503	0.00821409
	HORVU1Hr1G086910	1.03189	0.00821409
	HORVU1Hr1G016420	-0.90509	0.00822108
	HORVU3Hr1G105420	1.38585	0.00822497
	HORVU4Hr1G073380	-1.19368	0.0082284
	HORVU6Hr1G079640	1.85986	0.0082284
	HORVU1Hr1G005090	-1.18676	0.0082284
	HORVU1Hr1G065670	1.65471	0.0082284
	HORVU5Hr1G095260	-0.69468	0.00823849
	HORVU6Hr1G005360	1.24781	0.00823849
	HORVU6Hr1G015770	1.48481	0.00824354
	HORVU1Hr1G001140	-2.06794	0.00832153
	HORVU2Hr1G073380	0.851692	0.00833996
	HORVU1Hr1G049420	1.34985	0.00839897
	HORVU5Hr1G040970	0.619015	0.00841235
	HORVU5Hr1G088570	1.17055	0.00842407
	HORVU7Hr1G084110	-1.52145	0.00842407
	HORVU7Hr1G119590	-0.516943	0.0084339
	HORVU1Hr1G083380	0.998652	0.00843919
	HORVU2Hr1G081370	1.03612	0.00854152
	HORVU1Hr1G017460	0.941152	0.00857565
	HORVU0Hr1G007340	1.83689	0.00873845
	HORVU5Hr1G059310	1.40625	0.00876082
	HORVU7Hr1G117970	0.902972	0.00880194
	HORVU1Hr1G064030	-1.13297	0.00881001
	HORVU3Hr1G051610	-0.87533	0.00881598
	HORVU4Hr1G087760	-1.0361	0.00885959
	HORVU1Hr1G083370	0.997539	0.00885959
	HORVU3Hr1G107550	-2.06786	0.00888743
	HORVU3Hr1G080640	0.586432	0.00892518
	HORVU7Hr1G057260	-0.751727	0.00892518
	HORVU6Hr1G062350	1.54568	0.00896081
	HORVU1Hr1G054560	1.59132	0.00896894
	HORVU2Hr1G118050	-1.03998	0.00897893
	HORVU3Hr1G109590	2.12146	0.00897893
	HORVU4Hr1G056770	-1.2553	0.00897893
	HORVU1Hr1G035650	2.00752	0.00897893
	HORVU1Hr1G030390	0.917294	0.00900444
	HORVU4Hr1G089520	1.65757	0.00913951
	HORVU6Hr1G031080	1.37391	0.00914116
	HORVU7Hr1G030780	0.967729	0.00920507
	HORVU4Hr1G019980	-0.751678	0.00920507
	HORVU1Hr1G085480	1.21571	0.0092443
	HORVU4Hr1G057680	0.739465	0.0092549
	HORVU7Hr1G117880	1.66668	0.00928694
	HORVU6Hr1G067670	-0.881449	0.00930773
	HORVU3Hr1G024500	0.751586	0.00931225
	HORVU2Hr1G009950	-2.1185	0.00935931
	HORVU7Hr1G108890	-0.878112	0.0094314
	HORVU5Hr1G105840	2.00162	0.00947234
	HORVU7Hr1G088430	0.975404	0.00947234
	HORVU3Hr1G116740	1.04155	0.00948248
	HORVU4Hr1G015040	-1.49264	0.00950854
	HORVU7Hr1G085650	0.921857	0.00954345
	HORVU5Hr1G052820	1.48897	0.00961219
	HORVU3Hr1G045890	0.735113	0.00962859
	HORVU2Hr1G124320	2.06641	0.00964109
	HORVU3Hr1G084220	0.743899	0.00970773
	HORVU0Hr1G001430	1.69676	0.00975517
	HORVU0Hr1G038320	1.77997	0.0097631
	HORVU1Hr1G060530	-1.28132	0.0097648
	HORVU7Hr1G036470	1.07874	0.00980464
	HORVU1Hr1G005120	0.775892	0.00992331
	HORVU7Hr1G068630	-0.723038	0.00995303
	HORVU4Hr1G022830	1.33182	0.00997786
UCs (FDR>0.01)	HORVU4Hr1G074780	1.5285	0.0100472
	HORVU3Hr1G052930	-1.42845	0.0100671
	HORVU3Hr1G022960	1.63341	0.0101158
	HORVU7Hr1G114030	1.34366	0.0101158
	HORVU2Hr1G073410	0.845137	0.0101292
	HORVU4Hr1G063470	-1.56766	0.0102205
	HORVU7Hr1G111320	1.93373	0.0102445
	HORVU6Hr1G086860	1.11887	0.0102635
	HORVU3Hr1G000260	0.799006	0.0102788
	HORVU4Hr1G069790	1.09984	0.0103271
	HORVU3Hr1G006250	0.853895	0.0103523
	HORVU3Hr1G117640	1.82019	0.0103963
	HORVU1Hr1G066650	-1.45388	0.0103963
	HORVU2Hr1G038480	0.971613	0.0104614
	HORVU2Hr1G092190	1.09385	0.0104614
	HORVU3Hr1G018820	0.787004	0.0104614
	HORVU4Hr1G048330	0.953257	0.0105216
	HORVU1Hr1G088870	0.962978	0.0105328
	HORVU3Hr1G006410	2.0092	0.0105574
	HORVU3Hr1G002830	1.04708	0.0105893
	HORVU3Hr1G050080	1.62488	0.010603
	HORVU7Hr1G043880	2.06172	0.010603
	HORVU1Hr1G072690	1.94802	0.010603
	HORVU2Hr1G080200	-0.989041	0.0106335
	HORVU4Hr1G058340	2.02439	0.0107444
	HORVU1Hr1G088040	-0.797069	0.0108258
	HORVU1Hr1G056010	1.69777	0.0108683
	HORVU5Hr1G040180	-1.04197	0.0108932
	HORVU3Hr1G078960	1.10144	0.0109215
	HORVU7Hr1G098320	1.50992	0.0109215
	HORVU7Hr1G109080	-1.31152	0.0109215
	HORVU1Hr1G062330	0.777549	0.0109215
	HORVU2Hr1G002230	2.08159	0.0109491
	HORVU7Hr1G058120	0.883716	0.0109575
	HORVU3Hr1G116050	1.71384	0.0109888
	HORVU6Hr1G034760	0.992016	0.0110696
	HORVU6Hr1G014600	1.94656	0.0110725
	HORVU7Hr1G020370	1.82182	0.0110933
	HORVU7Hr1G033230	0.75357	0.0111008
	HORVU7Hr1G034270	1.39443	0.0111108
	HORVU7Hr1G070010	-1.11508	0.0111136
	HORVU5Hr1G093140	-1.48756	0.0111262
	HORVU2Hr1G087970	1.0388	0.0111279
	HORVU6Hr1G015450	1.14767	0.0112389
	HORVU3Hr1G028280	-1.01101	0.0112636
	HORVU4Hr1G003540	1.96291	0.0112763
	HORVU5Hr1G103400	-1.23904	0.011305
	HORVU6Hr1G054560	0.925125	0.011305
	HORVU0Hr1G016920	0.574495	0.0113717
	HORVU7Hr1G046820	1.57388	0.0114444
	HORVU1Hr1G083100	0.949993	0.0114922
	HORVU2Hr1G081800	0.78627	0.0114996
	HORVU1Hr1G049660	1.16987	0.0114996
	HORVU2Hr1G010830	-1.53142	0.0115392
	HORVU5Hr1G080430	-1.5701	0.0115437
	HORVU1Hr1G055440	-0.61237	0.0115737
	HORVU7Hr1G099560	1.44632	0.0116058
	HORVU3Hr1G049860	2.04873	0.0116593
	HORVU2Hr1G045810	1.29612	0.0116716
	HORVU1Hr1G005510	1.96654	0.0116716
	HORVU7Hr1G114020	1.76085	0.011702
	HORVU1Hr1G036970	1.80246	0.0117385
	HORVU5Hr1G020530	1.42749	0.0117453
	HORVU4Hr1G041760	1.34111	0.0117453
	HORVU7Hr1G122160	-1.53051	0.0118043
	HORVU4Hr1G067370	0.688511	0.0118043
	HORVU5Hr1G097930	-1.03466	0.0119225
	HORVU2Hr1G042490	-0.739347	0.0120211
	HORVU1Hr1G078250	-1.30828	0.0120565
	HORVU2Hr1G010060	2.06567	0.0120664
	HORVU7Hr1G107330	2.06473	0.0120664
	HORVU1Hr1G010810	-1.03468	0.0121352
	HORVU2Hr1G114660	1.07776	0.01217
	HORVU4Hr1G076720	0.640034	0.0122132
	HORVU5Hr1G027740	1.77156	0.0122425
	HORVU6Hr1G071190	-0.959351	0.0122425
	HORVU4Hr1G079150	-1.08293	0.0122606
	HORVU1Hr1G050960	0.766925	0.0122865
	HORVU5Hr1G047920	2.05951	0.0123018
	HORVU6Hr1G058930	-1.22513	0.0123018
	HORVU6Hr1G084690	1.2854	0.0123018
	HORVU2Hr1G031410	1.37033	0.012442
	HORVU5Hr1G124390	1.40924	0.0124863
	HORVU3Hr1G053300	-1.24031	0.0125139
	HORVU5Hr1G092510	-0.990012	0.0125602
	HORVU7Hr1G098280	1.47482	0.0125602
	HORVU4Hr1G063640	-0.691714	0.0125602
	HORVU4Hr1G070970	2.04763	0.0125602
	HORVU1Hr1G087010	-1.34992	0.0125602
	HORVU2Hr1G013400	1.78117	0.0125611
	HORVU4Hr1G058970	1.39481	0.0125982
	HORVU2Hr1G096640	1.58972	0.0126415
	HORVU2Hr1G104040	1.36143	0.0126415
	HORVU7Hr1G055100	0.817107	0.0126415
	HORVU2Hr1G026450	-1.03305	0.0127141
	HORVU5Hr1G050560	-0.63832	0.0128294
	HORVU3Hr1G093260	-1.06578	0.0128513
	HORVU1Hr1G075560	0.513294	0.0129353
	HORVU3Hr1G020640	-0.819128	0.0129457
	HORVU3Hr1G093080	-0.92604	0.0129728
	HORVU6Hr1G054890	-0.582328	0.0129728
	HORVU5Hr1G082310	-0.85978	0.0130664
	HORVU3Hr1G088850	1.07138	0.0131095
	HORVU6Hr1G091310	0.694842	0.0131535
	HORVU3Hr1G030650	1.46376	0.0131956
	HORVU1Hr1G046350	1.60097	0.0131956
	HORVU2Hr1G085880	-0.768959	0.0132844
	HORVU7Hr1G055280	-0.538249	0.0132894
	HORVU3Hr1G097470	-1.36989	0.0133949
	HORVU2Hr1G103010	0.516039	0.0133969
	HORVU6Hr1G055250	0.809986	0.0133988
	HORVU2Hr1G019290	-0.806424	0.0134538
	HORVU2Hr1G019160	-0.47946	0.013494
	HORVU5Hr1G011760	-1.03088	0.0135041
	HORVU3Hr1G079870	1.28491	0.013519
	HORVU1Hr1G070220	-0.660823	0.0135504
	HORVU1Hr1G051290	0.841088	0.013592
	HORVU5Hr1G008250	0.822427	0.0136145
	HORVU7Hr1G037060	1.18135	0.0136263
	HORVU1Hr1G001560	1.61285	0.0136354
	HORVU3Hr1G007540	1.23405	0.0137167
	HORVU7Hr1G043090	-1.04602	0.0137167
	HORVU4Hr1G062650	-1.29933	0.0137167
	HORVU4Hr1G076440	1.03075	0.0137414
	HORVU2Hr1G108520	2.03626	0.0137751
	HORVU7Hr1G043530	1.34903	0.0139087
	HORVU5Hr1G019820	1.45438	0.013953
	HORVU4Hr1G007340	0.796193	0.013953
	HORVU1Hr1G000520	-0.999399	0.013953
	HORVU7Hr1G100810	1.87307	0.0139588
	HORVU3Hr1G090410	-0.898151	0.0139784
	HORVU4Hr1G019990	1.21975	0.0141743
	HORVU5Hr1G060090	-0.719257	0.0141944
	HORVU5Hr1G080650	2.00805	0.014251
	HORVU6Hr1G081080	-0.917968	0.0143213
	HORVU4Hr1G010980	0.92017	0.0143286
	HORVU6Hr1G039740	-0.684847	0.0143567
	HORVU2Hr1G029890	-0.645737	0.0143978
	HORVU3Hr1G060800	-0.479629	0.0144011
	HORVU5Hr1G072370	1.83831	0.0144044
	HORVU1Hr1G044000	1.15075	0.0144054
	HORVU3Hr1G117450	2.02425	0.0144423
	HORVU3Hr1G055650	0.739105	0.0144431
	HORVU5Hr1G046520	1.53279	0.0144898
	HORVU4Hr1G024050	2.00802	0.0146604
	HORVU4Hr1G024360	1.30432	0.0146853
	HORVU2Hr1G037620	-0.890878	0.014696
	HORVU3Hr1G094090	-0.875757	0.0147386
	HORVU3Hr1G070370	-0.743604	0.0147454
	HORVU2Hr1G102920	1.42532	0.0147681
	HORVU4Hr1G056890	1.73923	0.0148027
	HORVU3Hr1G116060	1.39638	0.0148241
	HORVU4Hr1G081210	-1.08722	0.0149895
	HORVU6Hr1G090530	-0.992231	0.0149895
	HORVU1Hr1G044560	1.06506	0.0150027
	HORVU1Hr1G086680	0.857101	0.0152547
	HORVU7Hr1G084920	1.87014	0.0152779
	HORVU5Hr1G037440	1.03288	0.0152814
	HORVU0Hr1G013910	1.45215	0.0153204
	HORVU1Hr1G002890	1.51491	0.015329
	HORVU2Hr1G099810	-0.81613	0.0153928
	HORVU5Hr1G077920	0.682287	0.0153928
	HORVU5Hr1G094840	1.2748	0.0155013
	HORVU7Hr1G054670	-0.633604	0.0155013
	HORVU0Hr1G013770	0.56511	0.0155733
	HORVU7Hr1G018600	-1.04391	0.0156037
	HORVU3Hr1G007500	0.923017	0.0157228
	HORVU5Hr1G016210	0.75626	0.0157908
	HORVU1Hr1G078750	-1.33765	0.0157908
	HORVU5Hr1G114600	-1.68824	0.0158137
	HORVU7Hr1G038200	-1.07494	0.0158137
	HORVU4Hr1G053570	1.05787	0.0158137
	HORVU6Hr1G004990	-0.722446	0.0158137
	HORVU3Hr1G048950	1.52236	0.015826
	HORVU3Hr1G115820	-0.648306	0.0158501
	HORVU7Hr1G081070	1.83165	0.0158643
	HORVU0Hr1G022030	-1.00402	0.0159322
	HORVU4Hr1G077170	-1.59286	0.0159731
	HORVU4Hr1G062830	-1.19214	0.015984
	HORVU7Hr1G042300	-0.649564	0.0160437
	HORVU5Hr1G124210	1.96321	0.0161165
	HORVU3Hr1G026970	-0.99446	0.0161166
	HORVU7Hr1G050170	-0.651071	0.0161166
	HORVU5Hr1G083340	2.00145	0.0161332
	HORVU4Hr1G087770	1.99458	0.0161332
	HORVU1Hr1G065820	1.74463	0.0161864
	HORVU3Hr1G094600	0.882808	0.0162035
	HORVU4Hr1G071040	0.776573	0.0162442
	HORVU5Hr1G008270	-1.21075	0.0162926
	HORVU3Hr1G093750	1.99834	0.0163153
	HORVU7Hr1G074030	0.85825	0.0163861
	HORVU3Hr1G097270	-1.67519	0.0164305
	HORVU7Hr1G002060	-0.534371	0.0164494
	HORVU4Hr1G081590	1.99264	0.0164827
	HORVU2Hr1G106140	1.99441	0.0165778
	HORVU3Hr1G006270	1.59827	0.0165778
	HORVU3Hr1G040270	-0.546176	0.0165778
	HORVU3Hr1G048520	0.55094	0.0165778
	HORVU5Hr1G094380	-1.15929	0.0165778
	HORVU7Hr1G096840	1.02474	0.0165778
	HORVU3Hr1G112860	1.86007	0.0165896
	HORVU5Hr1G111500	-0.538502	0.0166036
	HORVU5Hr1G119860	-1.6637	0.0166208
	HORVU4Hr1G055510	1.04209	0.0166252
	HORVU4Hr1G031510	1.36379	0.0167071
	HORVU1Hr1G025530	1.17772	0.0167219
	HORVU3Hr1G096460	1.6693	0.0167264
	HORVU3Hr1G099570	-1.01159	0.0167264
	HORVU6Hr1G010400	1.14065	0.0167264
	HORVU4Hr1G080120	-1.04085	0.0168176
	HORVU2Hr1G019850	1.11764	0.0169431
	HORVU5Hr1G074980	-0.930244	0.0169667
	HORVU2Hr1G005630	1.05696	0.0171973
	HORVU7Hr1G075060	-0.782708	0.0172088
	HORVU0Hr1G000900	-1.10444	0.0172116
	HORVU5Hr1G092430	1.87767	0.0172294
	HORVU1Hr1G003490	-0.888024	0.0173226
	HORVU3Hr1G093550	1.47727	0.0174455
	HORVU2Hr1G033100	-0.69958	0.0174474
	HORVU3Hr1G029260	-0.563879	0.0174474
	HORVU2Hr1G117820	1.27565	0.0175099
	HORVU7Hr1G073720	-0.67536	0.0175099
	HORVU2Hr1G111200	1.06279	0.0175576
	HORVU4Hr1G080410	1.16992	0.0175855
	HORVU7Hr1G039560	-1.30254	0.0175903
	HORVU4Hr1G003270	-1.17638	0.0175961
	HORVU0Hr1G040360	-1.66789	0.0177194
	HORVU6Hr1G069380	-1.97163	0.0178506
	HORVU5Hr1G080170	-0.87649	0.0178637
	HORVU3Hr1G026880	-0.443955	0.0178999
	HORVU4Hr1G077350	-1.86243	0.0178999
	HORVU2Hr1G044890	1.51445	0.0179858
	HORVU5Hr1G018820	-0.837496	0.0179858
	HORVU3Hr1G017420	1.21241	0.0179937
	HORVU5Hr1G000510	1.74029	0.0179937
	HORVU6Hr1G081930	1.07779	0.0179937
	HORVU3Hr1G004850	0.538429	0.0180123
	HORVU7Hr1G063280	-0.60989	0.0180519
	HORVU0Hr1G017670	1.05077	0.0180562
	HORVU3Hr1G115020	-0.883721	0.0180774
	HORVU2Hr1G120090	-0.776366	0.0181468
	HORVU1Hr1G017050	0.81109	0.0181689
	HORVU1Hr1G015550	1.82164	0.018309
	HORVU4Hr1G014900	0.774872	0.0183144
	HORVU6Hr1G059860	0.74378	0.0183144
	HORVU5Hr1G052730	0.884066	0.0183596
	HORVU7Hr1G120660	1.56462	0.0183596
	HORVU1Hr1G022550	0.893874	0.0184448
	HORVU5Hr1G060070	1.13954	0.0184689
	HORVU7Hr1G084230	1.968	0.018592
	HORVU7Hr1G078500	0.580771	0.018602
	HORVU2Hr1G074210	1.8352	0.0186358
	HORVU3Hr1G087070	1.45205	0.0186358
	HORVU7Hr1G040850	1.32721	0.0186358
	HORVU7Hr1G121820	-1.24565	0.0186358
	HORVU5Hr1G069710	0.646535	0.0187809
	HORVU6Hr1G050500	1.29903	0.0188165
	HORVU5Hr1G125600	1.96465	0.0188497
	HORVU1Hr1G087900	-0.628365	0.0188994
	HORVU2Hr1G019810	-0.673441	0.0189503
	HORVU3Hr1G000980	1.17989	0.0189678
	HORVU5Hr1G048030	-0.616141	0.018982
	HORVU5Hr1G073580	1.83036	0.0190481
	HORVU4Hr1G000650	1.10204	0.0190947
	HORVU5Hr1G080300	1.95719	0.0191222
	HORVU7Hr1G058790	-1.48624	0.0191222
	HORVU5Hr1G045650	1.50151	0.0191719
	HORVU5Hr1G077620	-1.53764	0.0191944
	HORVU4Hr1G076610	1.58453	0.019202
	HORVU1Hr1G052700	-0.776743	0.0192039
	HORVU1Hr1G087110	1.36859	0.0193059
	HORVU4Hr1G049500	1.05675	0.0193263
	HORVU4Hr1G081600	-0.889652	0.0193572
	HORVU6Hr1G034570	0.918184	0.0193918
	HORVU1Hr1G086070	-0.567298	0.0194279
	HORVU2Hr1G100210	-1.06744	0.019479
	HORVU5Hr1G043790	1.60254	0.019479
	HORVU5Hr1G056360	1.04131	0.019479
	HORVU5Hr1G113620	0.952065	0.019479
	ENSRNA049489002	-1.00221	0.019479
	HORVU6Hr1G078110	0.935845	0.019479
	HORVU0Hr1G006740	1.342	0.019479
	HORVU0Hr1G035440	-1.17029	0.019479
	HORVU3Hr1G081100	1.05339	0.0195151
	HORVU2Hr1G095460	1.47	0.0195817
	HORVU5Hr1G106470	1.05006	0.0195817
	HORVU4Hr1G048700	1.14886	0.0195817
	HORVU2Hr1G085340	-1.18461	0.0195936
	HORVU3Hr1G087050	0.979792	0.0195981
	HORVU3Hr1G071430	0.815792	0.0196537
	HORVU3Hr1G002920	0.739994	0.0197237
	HORVU2Hr1G095870	-1.33015	0.0197257
	HORVU3Hr1G080040	0.827874	0.0198279
	HORVU2Hr1G103890	-0.540873	0.0199849
	HORVU3Hr1G081300	-0.812382	0.0200134
	HORVU7Hr1G001070	-1.21326	0.0201463
	HORVU2Hr1G018820	-0.719754	0.0201621
	HORVU3Hr1G017480	-1.94564	0.0201621
	HORVU3Hr1G061190	-0.937322	0.0201621
	HORVU7Hr1G034230	1.13679	0.0201973
	HORVU6Hr1G052600	-0.690083	0.0203002
	HORVU1Hr1G081980	1.8873	0.020304
	HORVU3Hr1G094300	1.18685	0.020314
	HORVU5Hr1G098000	1.31286	0.0203347
	HORVU6Hr1G022890	-0.678759	0.0203347
	HORVU7Hr1G044150	0.757317	0.0203881
	HORVU6Hr1G055820	-0.745108	0.0203966
	HORVU3Hr1G011200	-1.93404	0.0204011
	ENSRNA050015196	1.28212	0.0204013
	HORVU1Hr1G075530	-0.645662	0.0204013
	HORVU6Hr1G072990	1.67357	0.020408
	HORVU3Hr1G030970	1.92198	0.0204289
	HORVU5Hr1G045640	1.34152	0.0204925
	HORVU6Hr1G000520	-1.35005	0.0206174
	HORVU2Hr1G060480	0.892533	0.0206331
	HORVU6Hr1G089250	-1.05021	0.0206331
	HORVU3Hr1G086050	-0.508273	0.0206755
	HORVU3Hr1G059550	1.12136	0.020676
	HORVU5Hr1G022960	1.79786	0.0207099
	HORVU3Hr1G059480	1.5304	0.0208271
	HORVU2Hr1G063820	-0.926983	0.0208622
	HORVU3Hr1G096890	1.08807	0.0208788
	HORVU3Hr1G110140	-1.19851	0.0209274
	HORVU4Hr1G082740	1.40783	0.0209274
	HORVU5Hr1G082050	1.9311	0.0210136
	HORVU3Hr1G027200	1.78739	0.0211837
	HORVU7Hr1G003090	1.56036	0.0212035
	HORVU4Hr1G008700	-0.865113	0.0212572
	HORVU4Hr1G080660	0.953225	0.0212595
	HORVU3Hr1G065390	0.583544	0.0213128
	HORVU2Hr1G110310	-1.56376	0.0213996
	HORVU1Hr1G058700	1.51901	0.0213996
	HORVU5Hr1G116920	-1.30502	0.0215582
	HORVU2Hr1G045250	0.632592	0.0215767
	HORVU6Hr1G077010	-0.801304	0.0216768
	HORVU2Hr1G065750	1.67891	0.0216812
	HORVU7Hr1G024980	0.96337	0.0216989
	HORVU4Hr1G079310	-0.624417	0.0216989
	HORVU7Hr1G054520	1.33632	0.0217172
	HORVU7Hr1G048330	0.914179	0.0218041
	HORVU7Hr1G083070	-0.751676	0.0218845
	HORVU0Hr1G018320	-1.28453	0.0218865
	HORVU1Hr1G031990	1.10606	0.0220446
	HORVU6Hr1G059970	0.875585	0.0221869
	HORVU5Hr1G011730	1.67977	0.0222511
	HORVU2Hr1G083980	0.616736	0.022284
	HORVU3Hr1G000800	-1.2868	0.022286
	HORVU7Hr1G000260	-1.12238	0.0222905
	HORVU6Hr1G070130	-0.934049	0.0223263
	HORVU5Hr1G119030	1.85737	0.0224255
	HORVU1Hr1G054250	-0.63409	0.0224255
	HORVU2Hr1G006530	-1.23308	0.0224911
	HORVU1Hr1G002240	1.37915	0.0225117
	HORVU0Hr1G025440	-1.00039	0.0226754
	HORVU4Hr1G046230	-0.667386	0.0227062
	HORVU4Hr1G063180	-0.490449	0.0227289
	HORVU2Hr1G080060	-1.46848	0.0227342
	HORVU6Hr1G032410	1.65779	0.0227426
	HORVU0Hr1G038420	1.05816	0.0227486
	HORVU4Hr1G086800	-0.571399	0.0227496
	HORVU3Hr1G035180	-0.857065	0.022755
	HORVU5Hr1G067910	1.05222	0.022755
	HORVU1Hr1G056760	1.63275	0.022755
	HORVU2Hr1G085800	-0.950394	0.0227733
	HORVU7Hr1G039590	-1.37767	0.0227733
	HORVU2Hr1G115920	1.55315	0.0228078
	HORVU7Hr1G099070	0.796615	0.0228543
	HORVU2Hr1G076490	1.7351	0.0229907
	HORVU2Hr1G007760	-0.584475	0.0230103
	HORVU2Hr1G126080	1.90183	0.0232555
	HORVU6Hr1G058280	1.88867	0.0233457
	ENSRNA049486041	-1.9034	0.0233533
	HORVU1Hr1G082820	1.86169	0.0233918
	HORVU5Hr1G055950	1.40717	0.0234469
	HORVU2Hr1G042210	1.42765	0.0235389
	HORVU6Hr1G064340	-0.902786	0.0235775
	HORVU4Hr1G078410	0.646558	0.0235914
	HORVU1Hr1G081280	-0.779334	0.0236068
	HORVU2Hr1G019560	1.64648	0.0236531
	HORVU7Hr1G080780	1.57979	0.0236553
	HORVU5Hr1G097730	0.57664	0.0236903
	HORVU5Hr1G105790	1.36119	0.0236903
	HORVU5Hr1G047420	0.905748	0.0238334
	HORVU7Hr1G030480	1.83888	0.0239223
	HORVU6Hr1G091860	-1.06881	0.0240266
	HORVU1Hr1G068950	0.711422	0.0240497
	HORVU6Hr1G005580	-1.19473	0.0242978
	HORVU5Hr1G047000	-0.740839	0.0243211
	HORVU4Hr1G089890	1.43402	0.0243211
	HORVU1Hr1G083700	0.899148	0.0243653
	HORVU1Hr1G067730	1.20364	0.0243881
	HORVU4Hr1G089510	-1.8639	0.0244266
	HORVU1Hr1G001040	-1.30047	0.0244928
	HORVU2Hr1G014870	1.40829	0.0245341
	HORVU3Hr1G054360	-0.983394	0.0245581
	HORVU2Hr1G028540	1.44471	0.0246065
	HORVU5Hr1G056950	1.17298	0.024694
	HORVU5Hr1G124010	-0.630059	0.024694
	HORVU3Hr1G077980	1.56676	0.0246995
	HORVU5Hr1G100200	-0.448382	0.0247093
	HORVU6Hr1G088880	1.35719	0.0247093
	HORVU1Hr1G021170	0.564019	0.0247093
	HORVU4Hr1G005440	1.08356	0.0247503
	HORVU7Hr1G023770	1.88766	0.024756
	HORVU5Hr1G024160	0.969539	0.0248074
	HORVU6Hr1G042200	0.778406	0.0248074
	HORVU5Hr1G001920	0.941757	0.0248805
	HORVU1Hr1G049740	1.56638	0.0248805
	HORVU1Hr1G021150	0.67342	0.0249364
	HORVU1Hr1G084720	1.45176	0.0249364
	HORVU3Hr1G017410	-0.623529	0.0249743
	HORVU2Hr1G015690	-0.937556	0.0250076
	HORVU2Hr1G066480	0.736121	0.0250366
	HORVU2Hr1G122370	0.63655	0.0250366
	HORVU3Hr1G082900	0.827717	0.0250366
	HORVU5Hr1G039210	0.889105	0.0250366
	HORVU7Hr1G046760	1.77006	0.0250366
	HORVU6Hr1G062820	-1.37916	0.0252403
	HORVU7Hr1G049370	1.0618	0.0252749
	HORVU6Hr1G080340	-1.14342	0.0252952
	HORVU1Hr1G076660	-1.23206	0.0253149
	HORVU2Hr1G022800	-1.85666	0.0253192
	HORVU4Hr1G062060	-0.810595	0.0253764
	HORVU7Hr1G034630	-1.8558	0.0253862
	HORVU3Hr1G000160	-1.18452	0.0257491
	HORVU5Hr1G051870	1.26401	0.0257831
	HORVU6Hr1G087400	-1.05747	0.025848
	HORVU2Hr1G112620	0.645728	0.0258487
	HORVU2Hr1G108790	-1.87484	0.0259301
	HORVU2Hr1G123480	-0.659551	0.0259429
	HORVU6Hr1G089460	0.612507	0.0260222
	HORVU5Hr1G125460	1.88585	0.0262013
	HORVU5Hr1G007340	-1.35756	0.0262247
	HORVU2Hr1G099850	1.11913	0.0262815
	HORVU7Hr1G046320	1.10471	0.0262815
	HORVU7Hr1G055410	0.798099	0.0263016
	HORVU2Hr1G044590	1.16466	0.0263582
	HORVU6Hr1G022020	1.14466	0.0263582
	HORVU1Hr1G063700	-0.74031	0.0264206
	HORVU2Hr1G081750	0.621841	0.026581
	HORVU6Hr1G053550	-0.63499	0.026581
	HORVU3Hr1G015190	-0.581902	0.0265858
	HORVU6Hr1G034250	1.79451	0.0266035
	HORVU5Hr1G006780	-0.717582	0.0266145
	HORVU1Hr1G079440	-0.906831	0.0266242
	HORVU1Hr1G070460	1.84625	0.0266301
	HORVU4Hr1G074770	1.33512	0.0266438
	HORVU2Hr1G071380	1.14023	0.0267156
	HORVU4Hr1G052320	1.23227	0.0267156
	HORVU3Hr1G013390	1.87815	0.0268664
	HORVU2Hr1G032680	0.930833	0.026883
	HORVU2Hr1G081540	1.27454	0.0270535
	HORVU2Hr1G093140	1.04145	0.0270535
	HORVU2Hr1G115180	-1.05374	0.0270585
	HORVU3Hr1G028620	0.638789	0.0270809
	HORVU4Hr1G078910	-1.86317	0.0271206
	HORVU3Hr1G098580	0.94737	0.027248
	HORVU3Hr1G114820	1.80394	0.027248
	HORVU7Hr1G085570	1.00201	0.0272884
	HORVU1Hr1G050830	0.63487	0.0273551
	HORVU3Hr1G093280	1.58677	0.0273878
	HORVU5Hr1G022550	1.84307	0.0273878
	HORVU2Hr1G034440	0.827489	0.0274041
	HORVU0Hr1G018100	1.05117	0.0274363
	HORVU5Hr1G046590	0.624387	0.0275676
	HORVU3Hr1G037350	-1.00986	0.0277207
	HORVU5Hr1G022690	1.86447	0.0277602
	HORVU2Hr1G104980	-0.736315	0.027998
	HORVU4Hr1G006850	-0.606494	0.0280024
	HORVU4Hr1G067280	1.55298	0.0280887
	HORVU5Hr1G118410	1.84049	0.0282029
	HORVU5Hr1G052440	1.77964	0.0283171
	HORVU2Hr1G104960	-0.94963	0.0284104
	HORVU3Hr1G000640	-1.86527	0.028523
	HORVU3Hr1G031970	-1.86523	0.0285418
	HORVU2Hr1G030810	-1.00516	0.0285883
	HORVU2Hr1G045920	-0.762447	0.0286117
	HORVU5Hr1G112160	-0.665816	0.0286117
	HORVU6Hr1G070670	-0.531279	0.0286267
	HORVU7Hr1G087250	1.42127	0.0287012
	HORVU0Hr1G004480	-0.687203	0.0287012
	HORVU4Hr1G071140	1.26316	0.0287391
	HORVU1Hr1G023690	1.15042	0.0287391
	HORVU0Hr1G003480	-1.17376	0.0287391
	HORVU2Hr1G032130	0.983683	0.0287663
	HORVU3Hr1G021730	0.99353	0.0287663
	HORVU4Hr1G074140	1.42755	0.0287663
	HORVU6Hr1G004000	-1.21533	0.028894
	HORVU2Hr1G056750	-0.871942	0.0289844
	HORVU6Hr1G031650	0.946648	0.0290321
	HORVU2Hr1G044910	1.39817	0.0290856
	HORVU2Hr1G092650	-0.942208	0.0290856
	HORVU7Hr1G106150	-0.504131	0.0290856
	HORVU3Hr1G094370	1.80116	0.0291608
	HORVU1Hr1G077080	1.73053	0.0292135
	HORVU7Hr1G067060	-0.60993	0.0294543
	HORVU1Hr1G022570	-0.532865	0.0294626
	HORVU4Hr1G002080	-0.901613	0.0297263
	HORVU4Hr1G069260	1.73133	0.0297502
	HORVU2Hr1G065450	1.84224	0.0298011
	HORVU4Hr1G012530	1.19631	0.0298011
	HORVU6Hr1G034630	-0.648605	0.0298011
	HORVU6Hr1G019780	-1.25709	0.0298168
	HORVU1Hr1G030140	-0.626528	0.0298168
	HORVU2Hr1G061320	1.54205	0.029864
	HORVU7Hr1G001790	1.83524	0.0299844
	HORVU4Hr1G002710	0.830459	0.0299844
	HORVU1Hr1G076110	0.746945	0.0300644
	HORVU1Hr1G080820	-1.83655	0.0300644
	HORVU2Hr1G086460	-1.04763	0.0301263
	HORVU3Hr1G004420	-0.935448	0.0303259
	HORVU2Hr1G081650	-1.13168	0.0304755
	HORVU7Hr1G029200	0.841722	0.0305206
	HORVU6Hr1G030000	-0.5129	0.0305737
	HORVU1Hr1G072610	1.76559	0.030587
	HORVU5Hr1G077600	-1.23418	0.0306006
	HORVU3Hr1G016690	0.915198	0.0306915
	HORVU2Hr1G097850	-1.47697	0.0307055
	HORVU5Hr1G001290	1.20234	0.0307329
	HORVU7Hr1G059240	0.475197	0.0309339
	HORVU1Hr1G023460	1.21212	0.0309339
	HORVU3Hr1G077880	1.20282	0.0310082
	HORVU2Hr1G032780	-0.715932	0.0310105
	HORVU3Hr1G016430	1.22454	0.0310105
	HORVU1Hr1G018480	1.00577	0.0310205
	HORVU6Hr1G009400	-0.703372	0.0311398
	ENSRNA049489214	-0.998051	0.0312072
	HORVU2Hr1G097760	0.783467	0.03123
	HORVU3Hr1G104360	0.945038	0.0313503
	HORVU4Hr1G054870	0.766061	0.0313888
	HORVU5Hr1G070540	1.01832	0.0314047
	HORVU5Hr1G087870	-0.78414	0.0314187
	HORVU4Hr1G080140	-0.48305	0.0314963
	HORVU2Hr1G057430	-0.668433	0.0315181
	HORVU3Hr1G060580	1.46839	0.0315181
	HORVU1Hr1G070390	-0.549726	0.0315718
	HORVU6Hr1G093840	1.07026	0.0316044
	HORVU2Hr1G023260	0.963666	0.0318807
	HORVU2Hr1G101600	1.04496	0.0319215
	HORVU3Hr1G098340	1.2605	0.0319215
	HORVU5Hr1G032050	1.45478	0.031997
	HORVU6Hr1G004010	-1.10371	0.031997
	HORVU7Hr1G007520	1.73792	0.0320022
	HORVU2Hr1G032320	-0.778736	0.0320736
	HORVU1Hr1G071580	0.628391	0.0323461
	HORVU3Hr1G080830	1.26856	0.0323618
	HORVU4Hr1G002460	0.673106	0.0324529
	HORVU1Hr1G012680	1.41034	0.0325221
	HORVU2Hr1G079040	0.892521	0.0325397
	HORVU7Hr1G051520	-0.768058	0.0325397
	HORVU0Hr1G025250	-1.01556	0.0325728
	HORVU4Hr1G058500	-1.20878	0.0326113
	HORVU2Hr1G073680	0.73841	0.0327459
	HORVU6Hr1G094400	-0.743417	0.032747
	HORVU5Hr1G098260	-1.39819	0.032775
	HORVU3Hr1G069270	1.41114	0.0328373
	HORVU4Hr1G077240	-0.443145	0.0328373
	HORVU1Hr1G087380	-1.39832	0.0328418
	HORVU7Hr1G089850	0.731503	0.03289
	HORVU2Hr1G046380	-0.536146	0.0329009
	HORVU7Hr1G089880	1.27296	0.0329009
	HORVU5Hr1G013360	-0.821534	0.0329142
	HORVU2Hr1G113350	-0.541272	0.0329425
	HORVU3Hr1G059130	0.730265	0.0329425
	HORVU7Hr1G034860	0.81605	0.0329457
	HORVU5Hr1G110090	1.79646	0.0331983
	HORVU0Hr1G001470	-1.18666	0.0331983
	HORVU2Hr1G123200	-0.833645	0.0333037
	HORVU5Hr1G093860	1.70279	0.0333037
	HORVU7Hr1G076150	-0.563746	0.0333037
	HORVU1Hr1G059570	-0.551518	0.0333909
	HORVU7Hr1G049080	-0.787401	0.0335002
	HORVU2Hr1G081600	-1.19097	0.0335254
	HORVU5Hr1G093350	0.944318	0.0335254
	HORVU1Hr1G051580	1.45135	0.0336022
	HORVU2Hr1G011790	-1.26926	0.0336384
	HORVU3Hr1G082080	0.948182	0.0336384
	HORVU5Hr1G045580	-0.901012	0.0337547
	HORVU6Hr1G063830	0.519443	0.0337547
	HORVU5Hr1G018350	1.01952	0.0337646
	HORVU7Hr1G044210	1.36282	0.0338571
	HORVU7Hr1G115780	-0.637406	0.0338571
	HORVU1Hr1G077560	-1.20518	0.033864
	HORVU3Hr1G072920	1.19276	0.0338896
	HORVU4Hr1G001900	1.8136	0.0339111
	HORVU3Hr1G058910	-0.532943	0.0339865
	HORVU1Hr1G014070	0.763111	0.0339865
	HORVU3Hr1G078420	1.21324	0.034069
	HORVU2Hr1G114910	1.80971	0.0343142
	HORVU5Hr1G014340	-0.612279	0.0343142
	HORVU7Hr1G112470	-0.716773	0.0343508
	HORVU4Hr1G072310	1.03013	0.034375
	HORVU3Hr1G057730	1.55361	0.034443
	HORVU7Hr1G111360	-0.937923	0.0345234
	HORVU1Hr1G072710	0.891596	0.0345234
	HORVU3Hr1G046970	-0.869334	0.0346172
	HORVU7Hr1G037070	0.989089	0.0346647
	HORVU4Hr1G078780	-0.80997	0.0346647
	HORVU4Hr1G059950	1.06809	0.0347991
	HORVU5Hr1G081860	1.29669	0.0348163
	HORVU4Hr1G023570	-0.565338	0.0348607
	HORVU1Hr1G023750	-0.885471	0.0348607
	HORVU2Hr1G082590	0.750696	0.0348852
	HORVU5Hr1G002320	-1.05114	0.0348852
	HORVU2Hr1G100870	-0.952499	0.0349264
	HORVU3Hr1G074390	-0.698047	0.0349264
	HORVU3Hr1G076750	0.774399	0.0349264
	HORVU3Hr1G091020	1.0501	0.0349264
	HORVU2Hr1G071110	0.807493	0.0349867
	HORVU1Hr1G065270	-1.15026	0.0351057
	HORVU6Hr1G026810	0.510354	0.0351349
	HORVU2Hr1G014710	-0.563033	0.0351932
	HORVU5Hr1G113180	-0.488544	0.0351932
	HORVU6Hr1G064610	-0.62603	0.0351932
	HORVU2Hr1G048520	-1.27982	0.0353429
	HORVU5Hr1G050610	-0.550673	0.0353429
	HORVU7Hr1G050340	1.76053	0.0353429
	HORVU4Hr1G070250	-0.966816	0.0354564
	HORVU6Hr1G033160	0.881217	0.0354638
	HORVU2Hr1G059800	-0.886299	0.0355194
	HORVU4Hr1G018650	-0.860462	0.0356046
	HORVU4Hr1G069320	0.726609	0.0356333
	HORVU5Hr1G011570	-0.784942	0.035807
	HORVU4Hr1G090120	1.53006	0.0358304
	HORVU2Hr1G043780	-0.557559	0.0360139
	HORVU4Hr1G052610	0.805845	0.0360649
	HORVU6Hr1G073990	1.11768	0.0360649
	HORVU1Hr1G079070	-0.656735	0.0360702
	HORVU3Hr1G022590	1.17467	0.0361593
	HORVU2Hr1G086950	-1.53283	0.036218
	HORVU3Hr1G076640	-0.734974	0.036218
	HORVU1Hr1G000140	-0.634695	0.0362259
	HORVU4Hr1G088390	-0.490431	0.036267
	HORVU3Hr1G030040	1.09127	0.0363491
	HORVU3Hr1G078850	1.72238	0.0364031
	HORVU7Hr1G113350	0.822743	0.0364031
	HORVU5Hr1G085520	0.762908	0.0364526
	HORVU0Hr1G021390	-0.512901	0.0364631
	HORVU3Hr1G065770	-0.73438	0.0364889
	HORVU2Hr1G067250	0.713603	0.0365759
	HORVU0Hr1G015530	-0.627312	0.0366516
	HORVU5Hr1G061160	1.04165	0.0366932
	HORVU5Hr1G095910	-0.781211	0.0367135
	HORVU1Hr1G068960	1.41032	0.0367577
	HORVU3Hr1G076840	1.73813	0.0367712
	HORVU3Hr1G098730	1.55877	0.0368651
	HORVU5Hr1G051710	1.20247	0.0369037
	HORVU1Hr1G095410	0.998675	0.0371332
	HORVU3Hr1G117660	1.79588	0.0371371
	HORVU6Hr1G092740	1.27332	0.0371583
	HORVU0Hr1G007470	1.55268	0.0372048
	HORVU3Hr1G111560	1.78594	0.0372106
	HORVU2Hr1G104170	1.75235	0.0372253
	HORVU7Hr1G011840	-1.12094	0.0372462
	HORVU6Hr1G069260	1.27781	0.0372462
[truncated: 17,636 more rows]

## Sheet: Root LaCl3 raw
	Gene-ID	Log2FC	FDR
DEGs (FDR<0.01)	HORVU7Hr1G049370	2.74749	1.58261e-54
	HORVU3Hr1G105180	3.05996	7.48283e-42
	HORVU4Hr1G056240	-2.24239	2.25883e-33
	HORVU5Hr1G086650	2.41304	2.30637e-32
	HORVU2Hr1G067750	1.90036	1.15643e-30
	HORVU5Hr1G115900	1.78433	3.19369e-30
	HORVU7Hr1G122350	-2.72168	1.09855e-29
	HORVU6Hr1G005600	2.84384	1.09855e-29
	HORVU4Hr1G072300	2.40071	2.19425e-28
	HORVU7Hr1G121120	2.07554	6.15431e-27
	HORVU7Hr1G024190	3.10917	1.21755e-26
	HORVU0Hr1G012940	1.3357	5.96882e-26
	HORVU6Hr1G073520	2.06516	1.37211e-23
	HORVU3Hr1G105300	2.57218	1.6707e-23
	HORVU5Hr1G041660	2.03806	1.80183e-23
	HORVU2Hr1G122320	1.4188	2.76269e-22
	HORVU7Hr1G024930	1.73561	4.55351e-22
	HORVU7Hr1G000260	-1.52848	9.88931e-22
	HORVU1Hr1G000810	1.65032	1.01754e-21
	HORVU5Hr1G081620	1.55431	1.16124e-21
	HORVU4Hr1G040290	1.85147	2.06457e-21
	HORVU1Hr1G063340	2.6655	1.63679e-19
	HORVU7Hr1G020190	1.74564	1.67545e-19
	HORVU1Hr1G017050	1.25567	6.78878e-19
	HORVU3Hr1G021150	1.88243	8.75284e-19
	HORVU2Hr1G113300	2.44824	2.33895e-18
	HORVU3Hr1G112060	2.21412	3.97929e-18
	HORVU1Hr1G072890	1.80108	3.97929e-18
	HORVU4Hr1G085050	-1.29954	4.23182e-18
	HORVU6Hr1G032290	-2.98497	6.92676e-18
	HORVU4Hr1G013840	2.42608	1.02408e-17
	HORVU6Hr1G026810	1.18618	1.02408e-17
	HORVU4Hr1G081500	-3.01836	4.77653e-17
	HORVU7Hr1G036070	1.22564	6.66713e-17
	HORVU1Hr1G094180	1.7632	6.66713e-17
	HORVU5Hr1G059140	1.43522	6.69092e-17
	HORVU5Hr1G115880	2.08924	1.67386e-16
	HORVU5Hr1G094300	1.22144	3.03609e-16
	HORVU4Hr1G065520	1.0631	3.09537e-16
	HORVU0Hr1G003890	1.7513	4.79705e-16
	HORVU5Hr1G065620	1.53642	7.03695e-16
	HORVU3Hr1G105520	2.88779	1.45095e-15
	HORVU5Hr1G097730	1.46045	1.71033e-15
	HORVU7Hr1G095230	1.62619	1.71033e-15
	HORVU7Hr1G030690	-2.0425	2.02336e-15
	HORVU1Hr1G003370	-1.16295	2.02711e-15
	HORVU7Hr1G079030	1.86861	3.32516e-15
	HORVU4Hr1G066860	1.41395	3.85664e-15
	HORVU3Hr1G024590	1.6182	4.67148e-15
	HORVU1Hr1G049190	1.24066	6.35363e-15
	HORVU0Hr1G020750	-1.35456	6.37048e-15
	HORVU0Hr1G026700	1.49725	7.91075e-15
	HORVU6Hr1G077860	1.41886	2.06068e-14
	HORVU6Hr1G027620	-1.15959	2.59183e-14
	HORVU2Hr1G022250	1.31319	3.15128e-14
	HORVU2Hr1G092460	1.61543	3.1821e-14
	HORVU7Hr1G077370	3.01537	4.50474e-14
	HORVU5Hr1G104580	1.50368	5.06565e-14
	HORVU5Hr1G093700	-1.11358	5.34914e-14
	HORVU7Hr1G088920	-1.99221	5.4086e-14
	HORVU4Hr1G057890	1.52429	5.4086e-14
	HORVU4Hr1G076970	1.85599	9.18855e-14
	HORVU1Hr1G082270	-1.97134	9.19148e-14
	HORVU1Hr1G049210	1.29867	9.22377e-14
	HORVU6Hr1G080360	1.99833	9.91309e-14
	HORVU7Hr1G119060	-1.40941	1.04739e-13
	HORVU1Hr1G049070	1.50974	1.54843e-13
	HORVU2Hr1G002500	-1.97357	1.57483e-13
	HORVU3Hr1G085450	2.04043	3.894e-13
	HORVU3Hr1G080830	1.08874	4.01805e-13
	HORVU1Hr1G047570	1.43617	4.28503e-13
	HORVU3Hr1G006040	1.90489	4.31021e-13
	HORVU3Hr1G116740	1.47531	5.78646e-13
	HORVU7Hr1G106900	-1.75505	5.78646e-13
	HORVU2Hr1G033610	1.06934	6.89238e-13
	HORVU6Hr1G021700	1.42457	7.86947e-13
	HORVU7Hr1G091350	2.31676	8.0211e-13
	HORVU7Hr1G102840	1.06823	8.3752e-13
	HORVU5Hr1G109190	1.27546	8.51059e-13
	HORVU3Hr1G097810	2.4103	1.25921e-12
	HORVU7Hr1G083550	-1.138	1.25921e-12
	HORVU1Hr1G024860	-1.14	1.56918e-12
	HORVU7Hr1G071600	-1.52214	1.64105e-12
	HORVU4Hr1G075200	-1.16082	2.25832e-12
	HORVU2Hr1G110120	-0.960768	2.72971e-12
	HORVU4Hr1G087390	-2.5406	2.7449e-12
	HORVU5Hr1G080300	3.01765	3.27463e-12
	HORVU6Hr1G019290	-1.28741	3.27463e-12
	HORVU2Hr1G124530	1.66123	3.35249e-12
	HORVU7Hr1G089300	-1.41413	3.65033e-12
	HORVU5Hr1G014170	1.9792	4.52252e-12
	HORVU4Hr1G077310	0.964681	4.59004e-12
	HORVU3Hr1G082110	-1.23747	6.34614e-12
	HORVU0Hr1G016410	-1.62584	6.74386e-12
	HORVU6Hr1G000440	-1.57038	6.79896e-12
	HORVU7Hr1G103330	1.23188	7.21337e-12
	HORVU1Hr1G059580	1.55998	7.72114e-12
	HORVU4Hr1G076420	2.5023	1.06548e-11
	HORVU2Hr1G109960	1.80972	1.07509e-11
	HORVU7Hr1G121210	-1.84192	1.28331e-11
	HORVU2Hr1G121170	2.38905	1.33139e-11
	HORVU7Hr1G090100	1.30928	1.52896e-11
	HORVU5Hr1G051310	-1.21783	1.59918e-11
	HORVU2Hr1G113270	1.05259	2.00395e-11
	HORVU4Hr1G008420	2.52876	2.71821e-11
	HORVU6Hr1G004010	-1.4165	3.08308e-11
	HORVU7Hr1G117800	2.42338	3.62589e-11
	HORVU1Hr1G084390	-1.28886	6.40222e-11
	HORVU6Hr1G011120	1.09921	7.23594e-11
	HORVU3Hr1G116060	1.1466	8.00497e-11
	HORVU1Hr1G063740	1.23205	8.57295e-11
	HORVU1Hr1G069200	-1.54274	8.6248e-11
	HORVU5Hr1G077880	-1.04802	9.184e-11
	HORVU7Hr1G001040	-1.30763	9.184e-11
	HORVU4Hr1G057740	1.48426	1.0507e-10
	HORVU6Hr1G010200	1.60006	1.099e-10
	HORVU7Hr1G009140	2.71847	1.27272e-10
	HORVU4Hr1G075250	-1.40834	1.27272e-10
	HORVU7Hr1G103060	1.36479	1.7067e-10
	HORVU5Hr1G084120	-0.982933	1.74155e-10
	HORVU7Hr1G053170	1.0012	1.74155e-10
	HORVU7Hr1G108570	-1.10067	1.93339e-10
	HORVU1Hr1G023750	1.24054	2.28038e-10
	HORVU3Hr1G027790	1.20548	2.63624e-10
	HORVU1Hr1G084180	1.39719	2.63624e-10
	HORVU5Hr1G099200	1.33547	3.00257e-10
	HORVU6Hr1G088140	0.993985	3.00372e-10
	HORVU4Hr1G078390	-1.04538	3.41956e-10
	HORVU2Hr1G090280	1.15473	3.90923e-10
	HORVU5Hr1G020880	1.78052	4.02051e-10
	HORVU5Hr1G048810	1.05948	4.12411e-10
	HORVU5Hr1G107410	1.48494	4.94315e-10
	HORVU5Hr1G114330	1.90565	4.94746e-10
	HORVU3Hr1G081570	1.67464	5.04675e-10
	HORVU7Hr1G079810	-1.18649	5.43702e-10
	HORVU5Hr1G125780	2.54562	6.76885e-10
	HORVU4Hr1G070610	2.23383	7.41929e-10
	HORVU2Hr1G090410	1.47693	7.47199e-10
	HORVU2Hr1G000280	1.28323	7.63433e-10
	HORVU1Hr1G053070	1.0434	8.30432e-10
	HORVU1Hr1G056180	-1.02983	1.03996e-09
	HORVU5Hr1G118800	2.35029	1.04422e-09
	HORVU5Hr1G067570	1.15961	1.20824e-09
	HORVU4Hr1G057550	1.65289	1.24999e-09
	HORVU6Hr1G003300	1.20181	1.2917e-09
	HORVU1Hr1G052040	-0.926508	1.59413e-09
	HORVU7Hr1G012600	-1.12625	1.64565e-09
	HORVU7Hr1G034230	0.978793	1.77381e-09
	HORVU3Hr1G018530	1.24982	1.81783e-09
	HORVU7Hr1G108790	-1.75392	1.82959e-09
	HORVU5Hr1G050970	1.24654	1.85342e-09
	HORVU3Hr1G023230	1.38578	1.98696e-09
	HORVU4Hr1G085800	2.53704	1.99411e-09
	HORVU6Hr1G079600	2.25022	2.18777e-09
	HORVU1Hr1G006920	1.76784	2.38632e-09
	HORVU2Hr1G111300	1.18984	2.68278e-09
	HORVU3Hr1G093280	1.75139	2.79737e-09
	HORVU3Hr1G063630	-1.41731	3.2603e-09
	HORVU1Hr1G066340	2.1213	3.33863e-09
	HORVU2Hr1G004230	1.00114	3.36702e-09
	HORVU6Hr1G053710	0.992486	3.46672e-09
	HORVU6Hr1G077620	1.28909	3.77884e-09
	HORVU6Hr1G055960	0.894571	4.13021e-09
	HORVU3Hr1G002000	1.87788	4.13835e-09
	HORVU5Hr1G012740	1.32225	4.45455e-09
	HORVU7Hr1G028910	-0.813543	4.64093e-09
	HORVU5Hr1G117110	-2.62722	5.68071e-09
	HORVU2Hr1G030660	1.38642	6.03339e-09
	HORVU5Hr1G094710	1.07912	7.22879e-09
	HORVU6Hr1G060140	2.06582	8.11474e-09
	HORVU2Hr1G108180	1.08332	8.19375e-09
	HORVU7Hr1G020620	-1.38881	8.28742e-09
	HORVU5Hr1G050940	0.828537	8.91042e-09
	HORVU2Hr1G088420	0.919794	9.85401e-09
	HORVU4Hr1G063190	-2.33471	1.00239e-08
	HORVU1Hr1G038810	1.16197	1.00856e-08
	HORVU1Hr1G055550	1.76544	1.22775e-08
	HORVU2Hr1G093950	1.43137	1.48705e-08
	HORVU2Hr1G082740	2.33366	1.98479e-08
	HORVU2Hr1G018470	2.08609	1.98634e-08
	HORVU7Hr1G076120	1.55489	2.00611e-08
	HORVU7Hr1G098830	1.36385	2.03889e-08
	HORVU3Hr1G098820	1.82232	2.16671e-08
	HORVU6Hr1G009910	2.45621	2.20994e-08
	HORVU4Hr1G080890	1.67359	2.41722e-08
	HORVU5Hr1G076510	1.60262	2.44897e-08
	HORVU2Hr1G096890	1.37714	2.49235e-08
	HORVU5Hr1G095080	-0.86747	2.57544e-08
	HORVU4Hr1G083030	-0.996879	2.91004e-08
	HORVU7Hr1G085130	1.44123	2.94798e-08
	HORVU1Hr1G016770	-1.14928	3.60624e-08
	HORVU4Hr1G072480	0.80938	3.69895e-08
	HORVU5Hr1G006780	-0.77944	3.74205e-08
	HORVU2Hr1G038990	-1.19353	3.79165e-08
	HORVU1Hr1G071620	1.04542	3.89556e-08
	HORVU7Hr1G012180	2.39029	4.15124e-08
	HORVU3Hr1G098580	1.4277	4.25879e-08
	HORVU4Hr1G012530	1.53863	4.28313e-08
	HORVU1Hr1G049280	0.966099	4.28313e-08
	HORVU5Hr1G120800	0.893855	4.2898e-08
	HORVU4Hr1G085250	1.51654	4.49949e-08
	HORVU5Hr1G056390	1.04043	4.87481e-08
	HORVU1Hr1G083180	1.67863	5.32154e-08
	HORVU4Hr1G013150	1.61458	5.76605e-08
	HORVU7Hr1G096690	1.43017	5.89791e-08
	HORVU5Hr1G115100	0.92554	6.65467e-08
	HORVU6Hr1G027810	1.34553	8.32673e-08
	HORVU5Hr1G040970	0.933872	8.52288e-08
	HORVU4Hr1G065800	0.82634	8.72318e-08
	HORVU1Hr1G001060	2.25192	9.14836e-08
	HORVU2Hr1G068200	0.822222	1.02231e-07
	HORVU4Hr1G008270	-0.859019	1.03708e-07
	HORVU3Hr1G099590	1.45411	1.08627e-07
	HORVU1Hr1G068170	-0.896083	1.15693e-07
	HORVU5Hr1G103420	1.10669	1.17785e-07
	HORVU7Hr1G033230	0.929567	1.20616e-07
	HORVU6Hr1G077630	-1.73609	1.33768e-07
	HORVU6Hr1G005590	1.51334	1.37823e-07
	HORVU1Hr1G038680	-1.14026	1.3942e-07
	HORVU7Hr1G067220	1.21829	1.62553e-07
	HORVU5Hr1G043730	1.07992	1.66629e-07
	HORVU2Hr1G116830	-1.18358	1.69493e-07
	HORVU3Hr1G066450	-0.846308	1.69493e-07
	HORVU3Hr1G078260	-1.0667	1.69493e-07
	HORVU4Hr1G054470	-1.43694	1.77527e-07
	HORVU7Hr1G002560	-1.06214	1.83721e-07
	HORVU5Hr1G083240	1.19377	1.88211e-07
	HORVU1Hr1G026840	0.952762	1.97123e-07
	HORVU2Hr1G118740	1.20909	2.12111e-07
	HORVU3Hr1G115990	0.948474	2.15899e-07
	HORVU3Hr1G024500	0.921266	2.20341e-07
	HORVU6Hr1G005580	1.60107	2.25891e-07
	HORVU2Hr1G107100	1.07303	2.25929e-07
	HORVU2Hr1G045970	0.975676	2.27938e-07
	HORVU7Hr1G101590	0.879724	2.37769e-07
	HORVU3Hr1G095620	1.0888	2.38311e-07
	HORVU7Hr1G079790	-1.4605	2.44745e-07
	HORVU1Hr1G025670	0.806539	2.55733e-07
	HORVU2Hr1G041590	1.02397	2.5898e-07
	HORVU6Hr1G074030	0.875637	2.65077e-07
	HORVU4Hr1G019490	1.57066	2.71499e-07
	HORVU3Hr1G006440	-0.954103	2.76312e-07
	HORVU7Hr1G049860	-0.995425	3.26987e-07
	HORVU1Hr1G046690	-1.19626	3.56191e-07
	HORVU3Hr1G117370	2.02268	3.62164e-07
	HORVU3Hr1G106850	0.846639	3.62739e-07
	HORVU2Hr1G027370	-1.35048	3.63889e-07
	HORVU4Hr1G016810	0.855083	3.66813e-07
	HORVU6Hr1G004000	-1.21417	3.66813e-07
	HORVU1Hr1G062030	-1.07701	3.82264e-07
	HORVU2Hr1G008740	1.65412	3.89391e-07
	HORVU0Hr1G013890	0.928361	3.95534e-07
	HORVU7Hr1G073460	1.0008	3.96639e-07
	HORVU6Hr1G020140	1.03301	3.96639e-07
	HORVU7Hr1G120210	0.952005	4.04568e-07
	HORVU3Hr1G056090	1.60975	4.29193e-07
	HORVU6Hr1G067880	-1.50698	4.29193e-07
	HORVU3Hr1G035470	0.802112	4.41772e-07
	HORVU7Hr1G049470	0.84216	4.67076e-07
	HORVU6Hr1G058780	1.04756	4.72133e-07
	HORVU5Hr1G053010	-1.28924	4.75327e-07
	HORVU7Hr1G038570	2.1758	4.75327e-07
	HORVU0Hr1G000250	1.16907	4.75327e-07
	HORVU2Hr1G007530	1.99545	4.78e-07
	HORVU5Hr1G080090	2.15173	4.80227e-07
	HORVU7Hr1G038510	1.04362	5.02802e-07
	HORVU7Hr1G008510	-1.30538	5.21641e-07
	HORVU6Hr1G028590	1.02369	5.21641e-07
	HORVU2Hr1G007540	1.25535	5.23609e-07
	HORVU6Hr1G073630	0.914585	5.59218e-07
	HORVU3Hr1G070490	-0.850724	5.6433e-07
	HORVU3Hr1G116310	1.38133	5.70267e-07
	HORVU5Hr1G094700	0.783449	5.86918e-07
	HORVU2Hr1G092190	1.31864	5.87485e-07
	HORVU2Hr1G114230	1.44124	5.94532e-07
	HORVU4Hr1G090820	0.8851	5.94532e-07
	HORVU2Hr1G001030	-1.25237	6.21395e-07
	HORVU2Hr1G021830	0.90307	6.21395e-07
	HORVU7Hr1G110320	-1.10441	6.30466e-07
	HORVU7Hr1G011250	1.59055	6.44681e-07
	HORVU5Hr1G119860	1.37271	6.45276e-07
	HORVU5Hr1G047730	0.888117	6.55744e-07
	HORVU7Hr1G098550	2.30837	6.55744e-07
	HORVU6Hr1G014450	0.770781	6.75782e-07
	HORVU4Hr1G059390	1.15475	7.32715e-07
	HORVU7Hr1G055410	0.892015	7.51791e-07
	HORVU6Hr1G082350	1.02629	7.80263e-07
	HORVU1Hr1G009640	1.42097	7.97715e-07
	HORVU2Hr1G104580	-1.51756	8.11733e-07
	HORVU2Hr1G070440	1.04757	8.26675e-07
	HORVU1Hr1G080200	-1.07573	8.80318e-07
	HORVU5Hr1G022140	-1.03324	9.35297e-07
	HORVU5Hr1G010880	-1.13928	9.59797e-07
	HORVU4Hr1G077300	2.25019	9.69275e-07
	HORVU3Hr1G001360	-1.12316	9.91874e-07
	HORVU5Hr1G014310	1.24469	1.00935e-06
	HORVU5Hr1G048240	-1.41097	1.16374e-06
	HORVU2Hr1G083080	0.909474	1.16947e-06
	HORVU1Hr1G083380	1.28534	1.21122e-06
	HORVU6Hr1G081000	0.769875	1.3122e-06
	HORVU7Hr1G020370	1.4049	1.3391e-06
	HORVU5Hr1G115250	1.36867	1.34516e-06
	HORVU2Hr1G113310	2.14123	1.3919e-06
	HORVU3Hr1G000620	-1.76272	1.41056e-06
	HORVU3Hr1G036150	-0.852989	1.41056e-06
	HORVU3Hr1G030650	1.20934	1.54527e-06
	HORVU7Hr1G089370	-1.06944	1.57051e-06
	HORVU5Hr1G039900	2.15943	1.57998e-06
	HORVU4Hr1G026200	1.1922	1.77695e-06
	HORVU6Hr1G026200	0.901395	1.77695e-06
	HORVU1Hr1G089280	-0.810238	1.87691e-06
	HORVU0Hr1G009400	1.11594	1.87691e-06
	HORVU2Hr1G025680	-1.3753	1.89709e-06
	HORVU7Hr1G118560	0.955461	2.03611e-06
	HORVU3Hr1G056960	1.0073	2.08056e-06
	HORVU2Hr1G124960	0.940732	2.08431e-06
	HORVU5Hr1G066720	0.987663	2.08768e-06
	HORVU7Hr1G040430	0.748548	2.08791e-06
	HORVU2Hr1G085370	-1.36792	2.18794e-06
	HORVU1Hr1G067460	0.807956	2.21483e-06
	HORVU3Hr1G025270	1.17776	2.35849e-06
	HORVU2Hr1G012360	-0.874239	2.40993e-06
	HORVU5Hr1G013360	-1.00173	2.45309e-06
	HORVU4Hr1G018450	-1.42261	2.48945e-06
	HORVU1Hr1G063700	-0.965336	2.58649e-06
	HORVU2Hr1G097200	0.674097	2.66658e-06
	HORVU4Hr1G057110	-1.1307	2.74802e-06
	HORVU3Hr1G040270	-0.673626	2.78492e-06
	HORVU6Hr1G019510	0.735935	2.78492e-06
	HORVU2Hr1G079020	0.698929	3.02266e-06
	HORVU3Hr1G089540	-1.28282	3.0352e-06
	HORVU2Hr1G045330	-1.08944	3.11328e-06
	HORVU5Hr1G015010	2.18472	3.13989e-06
	HORVU5Hr1G024160	0.996177	3.13989e-06
	HORVU2Hr1G080710	-0.703727	3.30297e-06
	HORVU2Hr1G091910	1.04931	3.48713e-06
	HORVU5Hr1G054180	-0.864336	3.5072e-06
	HORVU7Hr1G006940	2.06357	3.50815e-06
	HORVU7Hr1G117550	-1.19306	4.33626e-06
	HORVU2Hr1G010800	-0.954398	4.51572e-06
	HORVU5Hr1G084510	-1.27175	4.51725e-06
	HORVU2Hr1G002440	-1.05552	4.7909e-06
	HORVU1Hr1G051740	-1.15322	5.25595e-06
	HORVU2Hr1G110110	-0.649147	5.90044e-06
	HORVU3Hr1G071220	-0.868979	6.01034e-06
	HORVU4Hr1G016770	0.739361	6.06538e-06
	HORVU3Hr1G108750	1.2468	6.13313e-06
	HORVU2Hr1G116670	1.11323	6.22664e-06
	HORVU1Hr1G018370	0.896473	6.28366e-06
	HORVU2Hr1G007720	1.84717	6.58101e-06
	HORVU5Hr1G102900	1.65551	6.58101e-06
	HORVU2Hr1G020690	-1.12939	6.59342e-06
	HORVU1Hr1G059590	0.96786	7.01976e-06
	HORVU2Hr1G124930	1.11993	7.18696e-06
	HORVU5Hr1G060460	0.744536	7.77492e-06
	HORVU4Hr1G071040	0.866765	7.77492e-06
	HORVU2Hr1G109370	-0.844359	7.9597e-06
	HORVU3Hr1G020020	-0.816216	7.9597e-06
	HORVU2Hr1G019790	0.746182	8.05769e-06
	HORVU7Hr1G002280	-1.26861	8.05777e-06
	HORVU3Hr1G074230	0.916549	8.11819e-06
	HORVU4Hr1G090860	1.02917	8.45036e-06
	HORVU7Hr1G095960	0.84823	8.85897e-06
	HORVU3Hr1G076620	1.25165	9.09017e-06
	HORVU6Hr1G018370	0.697259	9.3562e-06
	HORVU4Hr1G056500	0.943068	9.69042e-06
	HORVU1Hr1G067660	0.876203	9.69042e-06
	HORVU7Hr1G122490	1.13596	9.69895e-06
	HORVU3Hr1G013680	-0.979268	9.7613e-06
	HORVU2Hr1G088030	-1.01463	1.00074e-05
	HORVU0Hr1G016310	0.856875	1.01123e-05
	HORVU2Hr1G094960	1.40733	1.03003e-05
	HORVU5Hr1G081930	0.705849	1.0324e-05
	HORVU1Hr1G059000	0.782562	1.03648e-05
	HORVU3Hr1G095730	1.44859	1.11266e-05
	HORVU0Hr1G020420	1.00878	1.15368e-05
	HORVU3Hr1G010920	1.38917	1.18341e-05
	HORVU7Hr1G034470	-1.11095	1.187e-05
	HORVU4Hr1G056740	-0.702445	1.19557e-05
	HORVU3Hr1G006940	1.12974	1.21696e-05
	HORVU7Hr1G085170	1.97511	1.23828e-05
	HORVU1Hr1G066090	-0.94723	1.25959e-05
	HORVU6Hr1G051860	1.22134	1.27913e-05
	HORVU7Hr1G077860	-1.54035	1.29206e-05
	HORVU5Hr1G098960	-0.709376	1.32925e-05
	HORVU4Hr1G071790	0.954797	1.35434e-05
	HORVU2Hr1G007350	1.21034	1.36354e-05
	HORVU4Hr1G082600	1.01615	1.3798e-05
	HORVU5Hr1G011780	1.8552	1.39838e-05
	HORVU2Hr1G035020	-0.618212	1.4277e-05
	HORVU2Hr1G025080	1.5714	1.48386e-05
	HORVU4Hr1G087740	-0.887763	1.52589e-05
	HORVU2Hr1G104100	0.883922	1.54438e-05
	HORVU7Hr1G099650	-1.25114	1.54438e-05
	HORVU0Hr1G023720	1.95503	1.59304e-05
	HORVU6Hr1G084190	0.737286	1.60283e-05
	HORVU6Hr1G014610	-0.713405	1.63866e-05
	HORVU6Hr1G031960	0.960721	1.67787e-05
	HORVU6Hr1G077930	0.897637	1.68619e-05
	HORVU7Hr1G118240	-0.780188	1.72516e-05
	HORVU7Hr1G121470	1.38612	1.73562e-05
	HORVU7Hr1G040130	1.09345	1.7522e-05
	HORVU6Hr1G077890	0.649135	1.7862e-05
	HORVU6Hr1G092470	-1.32263	1.81115e-05
	HORVU2Hr1G066680	0.771158	1.8238e-05
	HORVU2Hr1G090310	0.882757	1.8238e-05
	HORVU6Hr1G036660	-0.813162	1.8238e-05
	HORVU5Hr1G123550	0.972053	1.84346e-05
	HORVU2Hr1G102130	0.884871	1.94582e-05
	HORVU5Hr1G036590	0.91791	1.95482e-05
	HORVU7Hr1G035740	1.06801	2.02821e-05
	HORVU1Hr1G006910	1.14628	2.02821e-05
	HORVU1Hr1G065630	0.911115	2.03121e-05
	HORVU1Hr1G003340	-0.807022	2.14345e-05
	HORVU1Hr1G063150	-1.35755	2.15026e-05
	HORVU3Hr1G027240	0.9225	2.24798e-05
	HORVU2Hr1G021150	-1.56842	2.27817e-05
	HORVU2Hr1G115640	-0.766582	2.32029e-05
	HORVU1Hr1G062380	0.884758	2.3523e-05
	HORVU3Hr1G006060	1.23745	2.41194e-05
	HORVU1Hr1G046020	-0.801426	2.46123e-05
	HORVU7Hr1G045400	-0.820396	2.49617e-05
	HORVU4Hr1G083410	-1.02513	2.52066e-05
	HORVU3Hr1G088020	1.06246	2.62302e-05
	HORVU3Hr1G100410	-1.31006	2.70819e-05
	HORVU2Hr1G016650	-0.900625	2.79586e-05
	HORVU1Hr1G056530	-0.979679	2.91308e-05
	HORVU1Hr1G064530	0.747944	2.91308e-05
	HORVU1Hr1G085500	-0.783933	2.91308e-05
	HORVU5Hr1G016810	1.15879	2.92926e-05
	HORVU6Hr1G077710	0.968025	2.99738e-05
	HORVU6Hr1G019540	-1.02685	3.03999e-05
	HORVU3Hr1G007960	-1.56114	3.14082e-05
	HORVU6Hr1G005960	-0.962152	3.14082e-05
	HORVU7Hr1G073720	-0.879158	3.16742e-05
	HORVU1Hr1G002100	1.03485	3.3251e-05
	HORVU2Hr1G082700	1.98746	3.33437e-05
	HORVU1Hr1G016720	1.33805	3.33437e-05
	HORVU4Hr1G046720	-1.24407	3.38118e-05
	HORVU3Hr1G076650	1.57988	3.44492e-05
	HORVU5Hr1G021830	-1.33674	3.51822e-05
	HORVU7Hr1G122080	1.49063	3.56764e-05
	HORVU5Hr1G093140	-1.04879	3.69339e-05
	HORVU4Hr1G088390	-0.713989	3.8108e-05
	HORVU7Hr1G092380	0.876475	3.87216e-05
	HORVU2Hr1G025670	-0.849449	3.91822e-05
	HORVU7Hr1G119480	-0.954302	4.0152e-05
	HORVU4Hr1G051290	1.11001	4.0152e-05
	HORVU3Hr1G065420	1.95915	4.03638e-05
	HORVU4Hr1G012750	1.30316	4.08874e-05
	HORVU7Hr1G027430	-0.920199	4.13651e-05
	HORVU3Hr1G000650	-1.46303	4.13736e-05
	HORVU4Hr1G039300	1.8436	4.13736e-05
	HORVU4Hr1G079710	0.888373	4.13736e-05
	HORVU7Hr1G091860	1.95384	4.16352e-05
	HORVU7Hr1G060480	1.21149	4.42003e-05
	HORVU7Hr1G107100	-0.673439	4.45511e-05
	HORVU1Hr1G009490	0.659541	4.45511e-05
	HORVU2Hr1G115750	1.30754	4.4626e-05
	HORVU5Hr1G048010	-0.665723	4.48421e-05
	HORVU6Hr1G025270	-0.852527	4.52707e-05
	HORVU6Hr1G065690	-0.720594	4.63999e-05
	HORVU2Hr1G027400	-1.27521	4.70512e-05
	HORVU4Hr1G048700	1.18276	4.72896e-05
	HORVU6Hr1G026280	0.707473	4.72896e-05
	HORVU3Hr1G013530	-0.854152	4.73205e-05
	HORVU4Hr1G015890	1.28881	4.8062e-05
	HORVU7Hr1G044070	-0.999156	4.9307e-05
	HORVU7Hr1G037180	0.707169	4.93919e-05
	HORVU3Hr1G115610	-1.36929	4.95011e-05
	HORVU7Hr1G107070	-1.13098	5.00069e-05
	HORVU7Hr1G008430	-1.33737	5.1648e-05
	HORVU3Hr1G083520	-1.16242	5.19235e-05
	HORVU2Hr1G091360	0.79098	5.26664e-05
	HORVU5Hr1G068060	1.04881	5.37403e-05
	HORVU7Hr1G082910	-0.944264	5.39065e-05
	HORVU2Hr1G115180	-0.728501	5.39863e-05
	HORVU2Hr1G101980	0.705726	5.41138e-05
	HORVU2Hr1G036510	0.856313	5.41763e-05
	HORVU6Hr1G011860	1.03579	5.41763e-05
	HORVU6Hr1G051560	0.805951	5.41763e-05
	HORVU1Hr1G000470	1.62125	5.41763e-05
	HORVU1Hr1G064210	-0.940344	5.41763e-05
	HORVU7Hr1G073190	-0.869579	5.42857e-05
	HORVU1Hr1G057540	1.02775	5.5486e-05
	HORVU5Hr1G106640	1.50554	5.68038e-05
	HORVU6Hr1G070610	1.29035	5.69137e-05
	HORVU4Hr1G056050	0.600371	5.69788e-05
	HORVU7Hr1G084290	0.679147	5.87531e-05
	HORVU4Hr1G005100	-0.706949	5.9609e-05
	HORVU2Hr1G112070	1.13773	6.06585e-05
	HORVU3Hr1G076640	1.08478	6.09611e-05
	HORVU3Hr1G112040	0.877856	6.18674e-05
	HORVU2Hr1G067330	1.8538	6.18751e-05
	HORVU3Hr1G019140	-0.978488	6.18751e-05
	HORVU7Hr1G034140	-0.784727	6.20005e-05
	HORVU5Hr1G037320	-0.997035	6.36505e-05
	HORVU7Hr1G094870	1.23128	6.52005e-05
	HORVU0Hr1G032110	-1.20363	6.62642e-05
	HORVU5Hr1G048380	-0.789359	6.79283e-05
	HORVU2Hr1G010440	-0.770963	6.96004e-05
	HORVU2Hr1G085520	-1.1755	7.04723e-05
	HORVU2Hr1G007980	0.688759	7.40286e-05
	HORVU1Hr1G058020	-0.719332	7.43294e-05
	HORVU6Hr1G083720	-0.947371	7.44575e-05
	HORVU2Hr1G104240	1.83465	7.47661e-05
	HORVU2Hr1G080460	0.729716	7.63465e-05
	HORVU5Hr1G045690	-1.03676	7.66572e-05
	HORVU6Hr1G026260	0.842356	7.66572e-05
	HORVU1Hr1G038120	0.892488	7.78521e-05
	HORVU3Hr1G111150	-1.15697	7.83099e-05
	HORVU7Hr1G051150	0.928873	7.87684e-05
	HORVU2Hr1G037940	-0.903681	8.41007e-05
	HORVU3Hr1G113820	-0.755955	8.47321e-05
	HORVU7Hr1G078760	-1.11312	8.4754e-05
	HORVU2Hr1G028510	-1.04081	8.68513e-05
	HORVU2Hr1G122300	0.964422	8.71775e-05
	HORVU2Hr1G022140	-1.16575	9.07816e-05
	HORVU7Hr1G035440	-1.13446	9.08515e-05
	HORVU6Hr1G000090	-1.14967	9.25321e-05
	HORVU1Hr1G048860	0.677342	9.3246e-05
	HORVU5Hr1G045650	1.1026	9.33915e-05
	HORVU6Hr1G072030	-0.824403	9.33915e-05
	HORVU7Hr1G055090	0.700607	9.36752e-05
	HORVU1Hr1G024170	-0.821031	9.36752e-05
	HORVU1Hr1G030390	0.812753	9.39176e-05
	HORVU4Hr1G081550	-1.26866	9.41758e-05
	HORVU7Hr1G035730	0.900874	9.47238e-05
	HORVU7Hr1G088730	-0.875746	9.47238e-05
	HORVU3Hr1G007970	-1.6575	9.50612e-05
	HORVU2Hr1G021700	-0.970735	9.51799e-05
	HORVU7Hr1G119720	0.843614	9.61165e-05
	HORVU4Hr1G024710	-0.672019	9.64024e-05
	HORVU6Hr1G070270	-0.64105	9.64024e-05
	HORVU6Hr1G084010	-1.87924	9.6853e-05
	HORVU4Hr1G078820	-0.828154	9.78196e-05
	HORVU5Hr1G112970	1.25077	9.81715e-05
	HORVU7Hr1G070080	-1.62039	0.000100849
	HORVU4Hr1G076760	1.4889	0.000100849
	HORVU5Hr1G095910	-0.55268	0.000104032
	HORVU4Hr1G063180	-0.644191	0.000108825
	HORVU1Hr1G078880	0.776807	0.000110303
	HORVU5Hr1G011460	-1.05246	0.000110964
	HORVU5Hr1G075510	-1.04591	0.000111158
	HORVU5Hr1G124240	-0.891469	0.000112482
	HORVU7Hr1G095930	1.10167	0.000112482
	HORVU6Hr1G017710	-1.23296	0.000115092
	HORVU3Hr1G114800	1.29805	0.000115127
	HORVU4Hr1G066270	0.660699	0.000116685
	HORVU4Hr1G019980	-0.792224	0.000118507
	HORVU5Hr1G092960	0.839018	0.000119267
	HORVU5Hr1G027110	1.34851	0.00012339
	HORVU3Hr1G030980	-0.69251	0.000129035
	HORVU7Hr1G037420	-0.640863	0.000129407
	HORVU5Hr1G001750	1.48699	0.00013066
	HORVU3Hr1G095670	0.808245	0.00013169
	HORVU7Hr1G047980	-0.771976	0.00013169
	HORVU5Hr1G060070	1.11896	0.000133241
	HORVU5Hr1G054820	-0.982055	0.000134243
	HORVU1Hr1G055870	-1.15996	0.000136746
	HORVU5Hr1G006900	0.655051	0.000136932
	HORVU1Hr1G072250	-0.911055	0.000138606
	HORVU1Hr1G050960	0.701729	0.000140458
	HORVU4Hr1G070070	0.631107	0.000144171
	HORVU2Hr1G047010	1.0807	0.000145102
	HORVU2Hr1G037550	-0.558933	0.000145488
	HORVU3Hr1G075920	1.10272	0.000147436
	HORVU3Hr1G019510	0.746299	0.00014762
	HORVU2Hr1G122580	1.0793	0.00014815
	HORVU5Hr1G019110	0.71319	0.000148432
	HORVU2Hr1G091680	0.593549	0.000148623
	HORVU3Hr1G096120	-0.826918	0.00015084
	HORVU4Hr1G004540	0.950443	0.000151591
	HORVU4Hr1G081070	-1.38636	0.00015458
	HORVU2Hr1G017950	0.86481	0.00016111
	HORVU5Hr1G112850	-0.752141	0.000163521
	HORVU7Hr1G097790	1.23081	0.000163521
	HORVU1Hr1G024140	0.920138	0.000167387
	HORVU6Hr1G091690	-0.807158	0.00016766
	HORVU3Hr1G073560	0.93015	0.000170589
	HORVU2Hr1G015940	0.830776	0.000171035
	HORVU5Hr1G006630	0.857637	0.000182833
	HORVU7Hr1G047740	1.47041	0.000184439
	HORVU7Hr1G088080	-0.746346	0.000184711
	HORVU2Hr1G019250	0.587785	0.000184773
	HORVU0Hr1G022370	1.80906	0.000186234
	HORVU0Hr1G002360	-0.804441	0.00018643
	HORVU7Hr1G002740	1.71094	0.000187442
	HORVU4Hr1G089750	-1.81399	0.000187442
	HORVU1Hr1G087530	-0.723634	0.000187442
	HORVU2Hr1G099220	-0.757695	0.000189168
	HORVU2Hr1G080970	-0.556655	0.00019127
	HORVU3Hr1G028620	0.596967	0.000194164
	HORVU7Hr1G097460	0.790232	0.00019485
	HORVU2Hr1G030150	0.872552	0.000195668
	HORVU7Hr1G092560	-0.977994	0.000195938
	HORVU2Hr1G045200	0.809407	0.000196051
	HORVU5Hr1G123540	0.815697	0.000199836
	HORVU4Hr1G000910	-0.951728	0.000199836
	HORVU0Hr1G004700	-0.762927	0.000199836
	HORVU5Hr1G084750	1.16559	0.000202587
	HORVU2Hr1G109850	-0.711834	0.000209478
	HORVU5Hr1G042570	-0.777229	0.000209478
	HORVU6Hr1G093230	-0.709587	0.000212619
	HORVU2Hr1G085880	-0.851748	0.000220427
	HORVU6Hr1G012800	-1.48431	0.000227956
	HORVU1Hr1G080320	-0.703881	0.000231286
	HORVU3Hr1G058460	-0.601212	0.00023412
	HORVU3Hr1G082070	0.717548	0.00023412
	HORVU7Hr1G075170	0.970182	0.000239399
	HORVU6Hr1G073040	0.745798	0.000239399
	HORVU6Hr1G091740	1.30773	0.000243114
	HORVU7Hr1G084830	0.758478	0.000246281
	HORVU2Hr1G081890	-1.0263	0.000250026
	HORVU1Hr1G058450	-0.956764	0.000250026
	HORVU5Hr1G093160	-1.08517	0.00025017
	HORVU3Hr1G021810	0.950707	0.000254494
	HORVU4Hr1G068820	-0.88954	0.000254494
	HORVU2Hr1G078350	-0.929752	0.000254652
	HORVU7Hr1G013220	1.24542	0.000257555
	HORVU5Hr1G051560	0.890201	0.000260475
	HORVU7Hr1G025200	-0.827458	0.000261222
	HORVU1Hr1G037250	0.788923	0.000262118
	HORVU3Hr1G079340	0.743023	0.000264894
	HORVU1Hr1G074340	-0.937091	0.000264894
	HORVU5Hr1G105870	-0.684334	0.000268585
	HORVU5Hr1G045620	-0.801941	0.000273351
	HORVU3Hr1G024200	0.903393	0.00027387
	HORVU3Hr1G048610	0.583484	0.000277553
	HORVU4Hr1G073150	-0.90727	0.0002791
	HORVU4Hr1G079310	-0.664604	0.0002791
	HORVU2Hr1G093870	1.05333	0.000280101
	HORVU6Hr1G026360	-1.27607	0.000281317
	HORVU7Hr1G053940	0.82113	0.000287954
	HORVU4Hr1G057000	0.959106	0.000301015
	HORVU4Hr1G067940	-1.0802	0.000302039
	HORVU1Hr1G004580	-1.25364	0.000302039
	HORVU7Hr1G080550	1.45483	0.000303155
	HORVU4Hr1G011280	0.72258	0.000304991
	HORVU2Hr1G028340	0.886136	0.00030606
	HORVU2Hr1G091440	-0.668888	0.000306089
	HORVU4Hr1G064870	1.06747	0.000310126
	HORVU3Hr1G028020	1.06575	0.000318986
	HORVU2Hr1G120150	1.14399	0.000319297
	HORVU2Hr1G091780	1.17212	0.000324014
	HORVU5Hr1G097020	-0.927644	0.000324208
	HORVU1Hr1G016980	0.937889	0.000325483
	HORVU3Hr1G026540	0.647088	0.000329059
	HORVU6Hr1G056610	-0.82069	0.000330883
	HORVU5Hr1G070230	0.911588	0.000331255
	HORVU1Hr1G044890	-0.857288	0.000331255
	HORVU1Hr1G037550	0.763911	0.000334073
	HORVU5Hr1G026650	-0.944581	0.000335894
	HORVU4Hr1G006530	-0.723528	0.000338983
	HORVU3Hr1G117590	0.787265	0.000340483
	HORVU7Hr1G117000	0.563747	0.000350173
	HORVU6Hr1G081400	0.903455	0.000351231
	HORVU7Hr1G056880	-1.102	0.000352327
	HORVU4Hr1G060280	0.770048	0.000352373
	HORVU6Hr1G021160	-0.766982	0.000357209
	HORVU6Hr1G028150	1.74756	0.00035986
	HORVU2Hr1G031310	0.518185	0.000360098
	HORVU1Hr1G049270	0.894264	0.000360151
	HORVU5Hr1G018240	0.776718	0.000363333
	HORVU6Hr1G035280	1.67659	0.000368131
	HORVU6Hr1G075970	-0.969262	0.000370095
	HORVU6Hr1G070900	-0.984238	0.000373702
	HORVU2Hr1G087860	0.69276	0.000377659
	HORVU6Hr1G091630	-1.02093	0.000379151
	HORVU7Hr1G106150	-0.666471	0.000379955
	HORVU6Hr1G048390	-0.773009	0.000380224
	HORVU2Hr1G114390	1.74587	0.000388562
	HORVU1Hr1G077100	-0.980061	0.00038897
	HORVU5Hr1G019590	0.696106	0.000392586
	HORVU6Hr1G015390	1.27025	0.000399148
	HORVU2Hr1G029890	-0.79875	0.000399445
	HORVU4Hr1G009960	-1.04872	0.000400036
	HORVU1Hr1G047440	-0.587754	0.000400508
	HORVU6Hr1G013530	-0.969428	0.000402044
	HORVU1Hr1G076730	1.32766	0.000402722
	HORVU6Hr1G079700	0.919984	0.000405486
	HORVU3Hr1G106260	0.961529	0.000409052
	HORVU7Hr1G080310	-0.833165	0.000414175
	HORVU4Hr1G065900	0.961212	0.000415519
	HORVU4Hr1G062830	-0.994537	0.000416297
	HORVU2Hr1G025740	-1.43065	0.000420689
	HORVU5Hr1G056280	0.71879	0.000427579
	HORVU3Hr1G095850	0.653196	0.000427782
	HORVU7Hr1G032270	-0.893169	0.000427782
	HORVU1Hr1G009630	1.20814	0.000427782
	HORVU3Hr1G056110	0.853268	0.000429325
	HORVU4Hr1G064820	-1.48318	0.000441098
	HORVU6Hr1G083470	-0.890389	0.000441935
	HORVU7Hr1G018530	1.68208	0.000443715
	HORVU3Hr1G072770	-0.917175	0.000455225
	HORVU2Hr1G056750	-0.862221	0.000461146
	HORVU4Hr1G081490	-1.34738	0.000462575
	HORVU2Hr1G124310	1.64065	0.000463368
	HORVU3Hr1G076750	0.560322	0.000468771
	HORVU3Hr1G078540	-0.899232	0.000470719
	HORVU6Hr1G087000	-0.692707	0.000474427
	HORVU6Hr1G076380	0.7839	0.000475998
	HORVU1Hr1G088040	-0.766474	0.000482788
	HORVU1Hr1G056210	0.814099	0.00050078
	HORVU2Hr1G081540	1.22015	0.000502177
	HORVU5Hr1G045640	1.04697	0.000502177
	HORVU2Hr1G001600	-0.587008	0.000505768
	HORVU2Hr1G098860	-0.612151	0.000505768
	HORVU4Hr1G073380	-0.99331	0.000505768
	HORVU6Hr1G075420	-0.914024	0.000506625
	HORVU5Hr1G079670	0.815092	0.000506909
	HORVU3Hr1G096890	1.1942	0.000516161
	HORVU2Hr1G021080	-0.572141	0.000524796
	HORVU2Hr1G083560	-1.52226	0.000524796
	HORVU5Hr1G060620	0.702431	0.000524796
	HORVU7Hr1G093580	0.699392	0.000524796
	HORVU3Hr1G068500	-0.843116	0.000542244
	HORVU4Hr1G067970	-0.983507	0.000543692
	HORVU2Hr1G025160	0.880425	0.000543706
	HORVU3Hr1G030340	1.11143	0.000543706
	HORVU1Hr1G055210	0.694229	0.000543706
	HORVU0Hr1G010070	1.37365	0.000546125
	HORVU3Hr1G039500	1.07883	0.000556795
	HORVU5Hr1G070540	1.21801	0.000556795
	HORVU4Hr1G082470	1.20888	0.000556795
	HORVU3Hr1G063280	1.27984	0.000561729
	HORVU7Hr1G031850	-0.756884	0.000565041
	HORVU7Hr1G034270	1.09036	0.000565041
	HORVU1Hr1G035130	-0.830809	0.000568573
	HORVU2Hr1G028210	0.890433	0.00057328
	HORVU4Hr1G070250	-0.837885	0.000575272
	HORVU1Hr1G012240	0.698166	0.000586755
	HORVU5Hr1G096940	0.731409	0.000588837
	HORVU5Hr1G122350	-0.674834	0.000594078
	HORVU4Hr1G081570	-1.28215	0.00059526
	HORVU4Hr1G002090	0.916578	0.000602977
	HORVU1Hr1G070690	0.853304	0.000605877
	HORVU6Hr1G063540	-0.722259	0.000608334
	HORVU2Hr1G118570	0.52483	0.000610244
	HORVU1Hr1G001040	0.917408	0.000610244
	HORVU5Hr1G082620	1.35876	0.000611827
	HORVU4Hr1G005320	1.08026	0.000611827
	HORVU6Hr1G061010	0.581705	0.000624694
	HORVU4Hr1G047430	-0.802934	0.0006288
	HORVU5Hr1G086500	-0.998362	0.000633535
	HORVU6Hr1G031580	-0.813331	0.000633549
	HORVU4Hr1G000830	1.07825	0.00063837
	HORVU7Hr1G020780	0.772687	0.000652472
	HORVU5Hr1G114700	0.653836	0.000653494
	HORVU2Hr1G103930	1.58001	0.000674013
	HORVU7Hr1G103560	1.21395	0.000674013
	HORVU4Hr1G086800	-0.802706	0.000689121
	HORVU3Hr1G100350	0.719706	0.0006905
	HORVU3Hr1G001140	-0.746149	0.000697815
	HORVU6Hr1G092280	-0.939405	0.000697815
	HORVU1Hr1G086380	-1.26062	0.00069824
	HORVU3Hr1G053300	-0.846745	0.000702905
	HORVU2Hr1G018970	-0.676752	0.000704516
	HORVU1Hr1G054200	-0.653565	0.000704791
	HORVU1Hr1G079440	-0.92822	0.000709666
	HORVU3Hr1G113120	-1.17931	0.000725234
	HORVU3Hr1G054070	0.79036	0.000727014
	HORVU6Hr1G021260	-0.818705	0.000732095
	HORVU1Hr1G066550	-0.582132	0.000732095
	HORVU0Hr1G007340	1.59876	0.000732095
	HORVU5Hr1G057730	1.31111	0.000735165
	HORVU2Hr1G118360	0.986832	0.000745227
	HORVU5Hr1G004370	1.67305	0.000748812
	HORVU4Hr1G018650	-0.522911	0.000753755
	HORVU1Hr1G060180	-0.662786	0.000755881
	HORVU6Hr1G000070	-0.798017	0.000756442
	HORVU0Hr1G020720	1.26611	0.000762714
	HORVU4Hr1G090030	-1.03594	0.000765504
	HORVU3Hr1G096860	1.67082	0.000769788
	HORVU7Hr1G070010	-0.64731	0.000769788
	HORVU7Hr1G048330	1.06096	0.000775022
	HORVU5Hr1G075670	0.737112	0.000776977
	HORVU4Hr1G072370	-1.05507	0.000776977
	HORVU5Hr1G062510	1.55787	0.000777549
	HORVU5Hr1G109910	-0.800422	0.000800081
	HORVU6Hr1G063830	0.529566	0.000800399
	HORVU3Hr1G081580	1.65556	0.000804345
	HORVU5Hr1G038070	-0.740872	0.000804345
	HORVU7Hr1G001020	-0.842203	0.000804345
	HORVU2Hr1G031260	0.721099	0.000822353
	HORVU1Hr1G032060	-0.649734	0.000822353
	HORVU2Hr1G083430	-1.06043	0.000823002
	HORVU5Hr1G080530	0.749899	0.000824119
	HORVU7Hr1G103170	0.62885	0.000825239
	HORVU7Hr1G101920	0.923223	0.000830064
	HORVU4Hr1G078020	-0.90645	0.000836823
	HORVU4Hr1G078580	-0.896577	0.000839641
	HORVU3Hr1G115020	-1.13818	0.000845809
	HORVU3Hr1G116790	0.55532	0.000845809
	HORVU7Hr1G111310	1.55063	0.000845809
	HORVU1Hr1G088870	1.08711	0.000845809
	HORVU1Hr1G000920	1.12087	0.000853137
	HORVU1Hr1G025040	-1.05314	0.000863692
	HORVU3Hr1G036020	-1.20466	0.000873478
	HORVU4Hr1G053790	-1.65585	0.000875524
	HORVU4Hr1G030810	0.742356	0.000896592
	HORVU1Hr1G088140	0.931953	0.000899546
	HORVU0Hr1G018320	-0.762637	0.000905128
	HORVU4Hr1G018640	-0.671738	0.000906518
	HORVU1Hr1G021180	1.12919	0.000909402
	HORVU6Hr1G081850	-0.858828	0.000909519
	HORVU3Hr1G063620	-0.960065	0.000913327
	HORVU4Hr1G002570	1.59841	0.000913327
	HORVU1Hr1G027140	1.65103	0.000913327
	HORVU4Hr1G066070	-1.03637	0.00091889
	HORVU2Hr1G027470	0.718486	0.00092013
	HORVU7Hr1G041470	0.841703	0.00092013
	HORVU5Hr1G083620	0.889727	0.000941076
	HORVU2Hr1G023750	1.08217	0.000941937
	HORVU4Hr1G054880	-0.885422	0.000949578
	HORVU2Hr1G098340	-0.76811	0.000955322
	HORVU2Hr1G075010	0.859754	0.000959966
	HORVU4Hr1G071270	-0.937571	0.000964941
	HORVU5Hr1G073350	-0.835642	0.000971965
	HORVU7Hr1G121820	-0.987707	0.000989585
	HORVU6Hr1G012400	1.2072	0.000989585
	HORVU1Hr1G080480	0.652642	0.000995107
	HORVU2Hr1G003830	0.856925	0.00100348
	HORVU5Hr1G004510	1.61355	0.00100533
	HORVU6Hr1G006120	-0.848155	0.00101615
	HORVU1Hr1G079370	-0.733297	0.00103252
	HORVU4Hr1G080810	1.02042	0.00103611
	HORVU1Hr1G085720	0.885618	0.00103611
	HORVU7Hr1G117970	0.762416	0.00104082
	HORVU2Hr1G028330	-1.00989	0.00104832
	HORVU2Hr1G067430	-1.05877	0.00104832
	HORVU2Hr1G099450	1.26452	0.00105039
	HORVU2Hr1G009840	-0.741773	0.00106516
	HORVU7Hr1G087240	-1.00835	0.0010717
	HORVU3Hr1G018820	0.761366	0.00107752
	HORVU2Hr1G104150	1.58942	0.00107757
	HORVU5Hr1G111890	1.0291	0.00107936
	HORVU2Hr1G076660	-0.742554	0.00108305
	HORVU3Hr1G057320	-0.678913	0.00108305
	HORVU3Hr1G076660	1.27684	0.00109332
	HORVU4Hr1G010540	-1.02026	0.00109332
	HORVU2Hr1G013500	-0.836135	0.0010957
	HORVU6Hr1G071190	0.797781	0.001096
	HORVU4Hr1G017450	0.574165	0.00109896
	HORVU2Hr1G026850	-1.38118	0.00109977
	HORVU4Hr1G084290	-0.822273	0.0011007
	HORVU3Hr1G086960	-0.710066	0.0011258
	HORVU3Hr1G058910	-0.657111	0.00114398
	HORVU6Hr1G085990	-1.09317	0.00116282
	HORVU2Hr1G019520	0.652079	0.00117229
	HORVU3Hr1G091740	1.27764	0.00117229
	HORVU5Hr1G080150	-0.919671	0.00118308
	HORVU4Hr1G059170	0.538378	0.00118308
	HORVU7Hr1G114950	0.806774	0.00119295
	HORVU4Hr1G056140	-0.494477	0.00119295
	HORVU3Hr1G085780	0.982608	0.00121898
	HORVU1Hr1G016660	-0.590826	0.00121898
	HORVU7Hr1G081590	-0.686024	0.00123485
	HORVU4Hr1G083550	0.981069	0.00123485
	HORVU3Hr1G084170	0.640104	0.00124018
	HORVU7Hr1G077900	-0.748826	0.00124622
	HORVU4Hr1G079040	-0.974998	0.00124622
	HORVU5Hr1G000150	-0.768466	0.00125246
	HORVU7Hr1G110280	-0.756634	0.00126131
	HORVU7Hr1G010230	-0.661625	0.00127757
	HORVU4Hr1G086520	0.965651	0.00127757
	HORVU1Hr1G017700	0.73667	0.00127757
	HORVU4Hr1G044040	0.680719	0.00127969
	HORVU2Hr1G043890	-0.77616	0.00128295
	HORVU7Hr1G067210	0.946596	0.00128473
	HORVU2Hr1G084800	0.828583	0.00129399
	HORVU3Hr1G034040	0.965323	0.00129443
	HORVU3Hr1G043390	-0.631172	0.00129824
	HORVU5Hr1G077920	0.627626	0.00130484
	HORVU6Hr1G035300	1.09282	0.00130484
	HORVU4Hr1G003400	0.656593	0.00130593
	HORVU5Hr1G018350	0.714514	0.0013155
	HORVU1Hr1G001910	0.593452	0.00131894
	HORVU2Hr1G086240	-0.625018	0.00132648
	HORVU0Hr1G029600	-1.20373	0.0013292
	HORVU2Hr1G094870	1.13559	0.00135027
	HORVU2Hr1G106080	-0.598365	0.00135027
	HORVU5Hr1G114090	0.876037	0.00135027
	HORVU6Hr1G003500	-0.896116	0.00135027
	HORVU5Hr1G083210	0.630155	0.00135947
	HORVU7Hr1G046370	1.20781	0.00135947
	HORVU4Hr1G026340	0.559597	0.0013605
	HORVU4Hr1G022630	-0.898112	0.00137562
	HORVU1Hr1G083710	-0.821395	0.00137562
	HORVU2Hr1G038740	-0.507241	0.00139059
	HORVU0Hr1G010080	1.08468	0.00139059
	HORVU1Hr1G057970	-0.559558	0.00142762
	HORVU1Hr1G079270	0.87212	0.00142842
	HORVU3Hr1G080040	0.894447	0.00142861
	HORVU2Hr1G068270	-0.573128	0.00142976
	HORVU7Hr1G074820	-0.742423	0.00143837
	HORVU2Hr1G114440	1.39587	0.00145401
	HORVU2Hr1G013400	1.57997	0.00148104
	HORVU4Hr1G020710	0.976894	0.00148104
	HORVU1Hr1G078280	0.926776	0.00148651
	HORVU0Hr1G023090	1.02907	0.00148758
	HORVU7Hr1G116890	1.35226	0.00148789
	HORVU5Hr1G046890	0.62975	0.00149046
	HORVU5Hr1G117080	0.666282	0.00149527
	HORVU7Hr1G030780	0.759423	0.00149974
	HORVU4Hr1G016500	-1.23596	0.00149974
	HORVU4Hr1G089120	-0.791026	0.00151391
	HORVU6Hr1G058640	1.11514	0.00151941
	HORVU1Hr1G000170	-0.792468	0.00151941
	HORVU4Hr1G071730	-0.633021	0.00152049
	HORVU5Hr1G119050	1.23945	0.00152113
	HORVU3Hr1G093400	-0.811897	0.00152592
	HORVU7Hr1G036780	0.593607	0.00153477
	HORVU7Hr1G078410	-0.779455	0.00154572
	HORVU1Hr1G023660	-0.714372	0.00156519
	HORVU3Hr1G047030	1.06162	0.0015703
	HORVU4Hr1G090190	0.895767	0.00159175
	HORVU1Hr1G084690	-1.07364	0.00159175
	HORVU5Hr1G098190	0.573862	0.00160477
	HORVU4Hr1G055240	-0.657854	0.00162457
	HORVU2Hr1G102710	1.02609	0.00163255
	HORVU4Hr1G038960	-0.525932	0.00164577
	HORVU6Hr1G091860	-0.925734	0.00164824
	HORVU1Hr1G092890	0.767941	0.00165696
	HORVU7Hr1G040840	0.964361	0.00165998
	HORVU2Hr1G066950	0.820248	0.00167771
	HORVU5Hr1G064020	0.776751	0.00167823
	HORVU2Hr1G109910	-0.876548	0.00167991
	HORVU3Hr1G020390	0.793921	0.00169631
	HORVU1Hr1G058500	-0.908053	0.00169631
	HORVU7Hr1G046970	0.609072	0.00169835
	HORVU7Hr1G118940	-0.653801	0.00169835
	HORVU7Hr1G093440	-0.863917	0.00172074
	HORVU4Hr1G002700	-0.740488	0.00172074
	HORVU2Hr1G086980	0.685212	0.00172224
	HORVU2Hr1G045920	-0.797918	0.00172829
	HORVU3Hr1G054240	-0.847241	0.00172829
	HORVU1Hr1G082970	0.690796	0.00172829
	HORVU5Hr1G046430	1.14436	0.00172947
	HORVU5Hr1G062610	0.99035	0.00172947
	HORVU1Hr1G086450	0.614931	0.00174714
	HORVU3Hr1G094800	1.3144	0.00175076
	HORVU5Hr1G070010	0.574606	0.00176787
	HORVU4Hr1G085750	-0.812082	0.00177485
	HORVU1Hr1G075920	-0.75156	0.00177973
	HORVU2Hr1G066480	0.6497	0.00179249
	HORVU0Hr1G039040	-0.78065	0.00182182
	HORVU3Hr1G078840	0.909345	0.00182582
	HORVU0Hr1G010870	-0.720152	0.00182786
	HORVU4Hr1G026150	1.36411	0.00183959
	HORVU2Hr1G114580	0.803607	0.00185199
	HORVU3Hr1G105620	1.27016	0.00186958
	HORVU6Hr1G044840	-0.800512	0.00186958
	HORVU4Hr1G000700	1.43098	0.00187939
	HORVU7Hr1G009800	0.725909	0.00188899
	HORVU4Hr1G086300	0.503153	0.00190188
	HORVU3Hr1G087320	-0.792601	0.00191124
	HORVU2Hr1G061850	-1.43855	0.00191684
	HORVU6Hr1G051930	-0.653223	0.00191684
	HORVU7Hr1G089910	0.832379	0.00192288
	HORVU4Hr1G082400	-0.550795	0.00195246
	HORVU3Hr1G023750	0.584376	0.00195716
	HORVU5Hr1G095060	-0.83188	0.00195716
	HORVU7Hr1G121260	1.42147	0.00195716
	HORVU1Hr1G058490	-0.833902	0.00195773
	HORVU3Hr1G028710	-1.15593	0.00196164
	HORVU7Hr1G080510	0.747015	0.00196736
	HORVU5Hr1G021730	-0.757158	0.00197572
	HORVU7Hr1G002820	0.690612	0.00199012
	HORVU5Hr1G094780	-0.75468	0.00199105
	HORVU4Hr1G010050	1.55056	0.00202741
	HORVU3Hr1G047230	-0.706522	0.00202835
	HORVU4Hr1G003100	-0.610579	0.00209176
	HORVU7Hr1G122770	0.96498	0.00214332
	HORVU5Hr1G079130	-0.926977	0.00218649
	HORVU5Hr1G120780	1.45726	0.00218659
	HORVU2Hr1G053290	-0.624391	0.00219233
	HORVU7Hr1G086890	-0.681938	0.00219421
	HORVU1Hr1G042020	-0.876615	0.00219897
	HORVU5Hr1G037130	0.808493	0.00220101
	HORVU1Hr1G064870	-0.5123	0.00220234
	HORVU3Hr1G097950	-0.463353	0.00220515
	HORVU1Hr1G059020	1.26564	0.00220515
	HORVU1Hr1G042050	-0.590814	0.0022076
	HORVU5Hr1G043080	1.10457	0.00221187
	HORVU1Hr1G056020	0.68471	0.00221187
	HORVU0Hr1G019500	0.708617	0.00224707
	HORVU4Hr1G072310	1.05336	0.00226205
	HORVU2Hr1G088650	1.53951	0.00226821
	HORVU1Hr1G083160	-0.583132	0.00227572
	HORVU1Hr1G017830	-0.890541	0.0022808
	HORVU1Hr1G021700	-0.87314	0.0022808
	HORVU1Hr1G080190	-0.793863	0.0022808
	HORVU3Hr1G007060	0.85474	0.00232012
	HORVU4Hr1G053130	0.660284	0.00232012
	HORVU2Hr1G010890	-0.764061	0.00235358
	HORVU5Hr1G084070	0.574177	0.00235958
	HORVU3Hr1G080430	1.11578	0.00236302
	HORVU7Hr1G033770	-0.61977	0.00237329
	HORVU7Hr1G072570	1.11115	0.00237329
	HORVU3Hr1G059230	-0.96748	0.00238014
	HORVU7Hr1G038290	-1.0078	0.00238014
	HORVU7Hr1G117400	1.02324	0.00238014
	HORVU6Hr1G021020	-0.533882	0.00238014
	HORVU7Hr1G048690	0.751297	0.00240785
	HORVU2Hr1G094360	-0.741797	0.0024255
	HORVU2Hr1G090210	-0.823766	0.00243762
	HORVU5Hr1G103180	0.539457	0.00244771
	HORVU1Hr1G089500	1.52004	0.00245052
	HORVU3Hr1G028440	1.06022	0.00246224
	HORVU7Hr1G052750	0.63281	0.00246224
	HORVU6Hr1G077000	-0.555207	0.00247596
	HORVU2Hr1G109080	0.599319	0.00252107
	HORVU5Hr1G018480	-1.05401	0.00252107
	HORVU4Hr1G003180	0.921643	0.00252107
	HORVU4Hr1G088670	-0.723988	0.00252107
	HORVU6Hr1G019130	-0.778594	0.00252107
	HORVU1Hr1G078530	-0.813172	0.00252107
	HORVU6Hr1G093520	0.975499	0.00254128
	HORVU5Hr1G093580	0.636905	0.0025505
	HORVU5Hr1G115820	0.760645	0.0025505
	HORVU1Hr1G047610	0.69541	0.0025505
	HORVU2Hr1G006090	-1.17052	0.00255353
	HORVU4Hr1G089540	-0.502115	0.00255353
	HORVU2Hr1G033100	-0.588733	0.00256018
	HORVU4Hr1G012770	-0.573513	0.00256683
	HORVU4Hr1G019930	-0.717971	0.00257242
	HORVU7Hr1G019830	-0.711117	0.00258
	HORVU6Hr1G080690	0.651631	0.00258
	HORVU5Hr1G119480	1.35303	0.00261686
	HORVU5Hr1G111510	-0.865083	0.00261779
	HORVU5Hr1G052600	1.10434	0.00264124
	HORVU5Hr1G065630	0.941368	0.00264124
	HORVU1Hr1G062330	0.785471	0.00264124
	HORVU3Hr1G083470	0.668495	0.00266342
	HORVU7Hr1G019510	0.793312	0.00266946
	HORVU2Hr1G029240	-0.784877	0.00269144
	HORVU4Hr1G067180	-1.27699	0.00269144
	HORVU2Hr1G091460	1.19025	0.00275876
	HORVU5Hr1G060370	-0.838086	0.00275876
	HORVU6Hr1G071520	-0.579886	0.00275876
	HORVU1Hr1G091830	-1.35072	0.00275876
	HORVU2Hr1G103010	0.481972	0.00276628
	HORVU0Hr1G021640	0.524657	0.00276628
	HORVU5Hr1G069040	-0.975064	0.00276981
	HORVU5Hr1G123530	0.740583	0.00278007
	HORVU7Hr1G046280	0.640469	0.00278964
	HORVU7Hr1G002140	1.123	0.00279689
	HORVU3Hr1G066090	1.40316	0.00282228
	HORVU2Hr1G109990	0.672567	0.00283798
	HORVU3Hr1G109330	0.858236	0.00285279
	HORVU2Hr1G076550	0.623837	0.00286555
	HORVU3Hr1G016490	-1.25921	0.00286556
	HORVU5Hr1G049420	1.48655	0.00286556
	HORVU1Hr1G017660	-0.713074	0.00288078
	HORVU5Hr1G056770	-0.623181	0.00289386
	HORVU2Hr1G080340	-0.700245	0.00290351
	HORVU2Hr1G092420	0.805066	0.00290521
	HORVU5Hr1G019880	1.02318	0.00290532
	HORVU3Hr1G089510	-0.742774	0.00293699
	HORVU1Hr1G073940	0.906667	0.00295014
	HORVU1Hr1G067140	-0.838522	0.00295664
	HORVU1Hr1G079130	-1.03218	0.00296459
	HORVU6Hr1G072910	0.564804	0.00300038
	HORVU2Hr1G065100	0.755211	0.0030261
	HORVU4Hr1G066230	1.34535	0.0030261
	HORVU5Hr1G009180	1.44726	0.00303081
	HORVU6Hr1G054580	-1.02853	0.00304341
	HORVU4Hr1G082290	-0.635287	0.00306182
	HORVU4Hr1G088140	-0.694733	0.00306182
	HORVU5Hr1G098290	-0.950041	0.00306433
	HORVU7Hr1G012310	0.909756	0.00308406
	HORVU4Hr1G052810	-0.784617	0.00309305
	HORVU1Hr1G087600	0.578018	0.00310482
	HORVU2Hr1G032910	-0.651461	0.0031176
	HORVU1Hr1G056430	-1.01572	0.00314268
	HORVU7Hr1G049340	1.49884	0.00314631
	HORVU5Hr1G113810	0.639761	0.00316477
	HORVU6Hr1G061870	0.922029	0.00316477
	HORVU0Hr1G017080	-0.892962	0.00316477
	HORVU5Hr1G073330	-1.17105	0.00316902
	HORVU5Hr1G028360	-0.497509	0.00317447
	HORVU1Hr1G072060	-0.762571	0.00319642
	HORVU3Hr1G094090	-0.828656	0.00319742
	HORVU2Hr1G109380	0.752578	0.00323051
	HORVU5Hr1G076700	-0.720563	0.00325744
	HORVU4Hr1G058940	-0.749766	0.00326095
	HORVU1Hr1G016870	0.89154	0.00330387
	HORVU6Hr1G013240	1.10278	0.00330956
	HORVU3Hr1G033620	-0.523896	0.00331469
	HORVU1Hr1G004670	-1.2352	0.00331949
	HORVU3Hr1G072120	-1.29717	0.00332189
	HORVU3Hr1G093140	1.36998	0.00332189
	HORVU6Hr1G009400	-0.736337	0.00332189
	HORVU4Hr1G075710	-0.692898	0.00333336
	HORVU3Hr1G030040	1.04596	0.00336652
	HORVU1Hr1G057510	-0.896756	0.00336652
	HORVU2Hr1G071880	0.584634	0.00337573
	HORVU6Hr1G087120	0.733962	0.00337573
	HORVU4Hr1G086330	-0.834884	0.00342363
	HORVU1Hr1G017570	-0.556673	0.00342363
	HORVU6Hr1G017920	-0.746479	0.00342825
	HORVU1Hr1G051050	-0.871827	0.00343848
	HORVU7Hr1G059460	-0.702357	0.00345961
	HORVU7Hr1G085790	0.592119	0.0034621
	HORVU6Hr1G008880	0.596403	0.0034638
	HORVU2Hr1G112580	1.20818	0.00347122
	HORVU7Hr1G002380	1.09177	0.00347447
	HORVU4Hr1G090590	0.983262	0.00350133
	HORVU2Hr1G039250	1.07234	0.00350167
	HORVU2Hr1G127650	1.42256	0.00350167
	HORVU6Hr1G018330	-0.903107	0.00350167
	HORVU2Hr1G124300	1.13791	0.00350219
	HORVU7Hr1G107670	1.39089	0.00350219
	HORVU2Hr1G096760	0.63088	0.00352856
	HORVU7Hr1G058750	0.968358	0.00352856
	HORVU5Hr1G053840	1.00943	0.00353252
	HORVU7Hr1G030220	0.549484	0.00353252
	HORVU4Hr1G040660	-0.573777	0.00353252
	HORVU1Hr1G092300	1.47473	0.00353252
	HORVU7Hr1G083070	-0.665378	0.00355365
	HORVU2Hr1G071890	1.46348	0.00356143
	HORVU2Hr1G062850	-0.707019	0.00360203
	HORVU4Hr1G074780	1.05959	0.00360448
	HORVU7Hr1G080850	-0.676839	0.0036095
	HORVU2Hr1G094540	-1.2303	0.00361117
	HORVU2Hr1G113180	-0.619835	0.00361117
	HORVU7Hr1G087490	1.0995	0.00361117
	HORVU4Hr1G078230	0.620504	0.00361117
	HORVU3Hr1G048520	0.563723	0.00361971
	HORVU7Hr1G038170	-1.16318	0.00366873
	HORVU6Hr1G089460	0.629359	0.00369814
	HORVU5Hr1G006360	-1.17353	0.00376713
	HORVU3Hr1G051650	0.761928	0.00377294
	HORVU6Hr1G073740	0.851193	0.00378351
	HORVU6Hr1G089780	0.564971	0.00378351
	HORVU2Hr1G038940	1.44167	0.00378788
	HORVU5Hr1G115280	-0.660885	0.00378788
	HORVU1Hr1G052620	-0.908821	0.00384848
	HORVU2Hr1G073210	1.47148	0.00384978
	HORVU3Hr1G032090	-0.949844	0.00386083
	HORVU3Hr1G114820	1.41842	0.00389413
	HORVU3Hr1G004420	-0.81061	0.00389461
	HORVU4Hr1G063590	1.10215	0.00390283
	HORVU6Hr1G089250	-0.81815	0.00390283
	HORVU6Hr1G090560	0.699191	0.00390283
	HORVU2Hr1G113540	-1.35743	0.00390878
	HORVU5Hr1G104740	1.46533	0.00394506
	HORVU2Hr1G118210	0.743097	0.0039485
	HORVU4Hr1G054480	-0.816396	0.0039485
	HORVU4Hr1G040280	-0.519465	0.00395076
	HORVU6Hr1G072640	-0.959225	0.00395076
	HORVU7Hr1G046980	-0.748395	0.00395892
	HORVU3Hr1G040360	-0.534052	0.00396277
	HORVU1Hr1G075620	0.655628	0.00397655
	HORVU3Hr1G031330	-0.62484	0.00398541
	HORVU1Hr1G001920	-0.751241	0.00400721
	HORVU5Hr1G080860	1.14254	0.004011
	HORVU7Hr1G119590	-0.451818	0.004011
	HORVU6Hr1G073850	-0.882129	0.004011
	HORVU4Hr1G081990	0.658769	0.00401977
	HORVU5Hr1G100700	-0.58206	0.00406179
	HORVU4Hr1G025840	0.485012	0.00406732
	HORVU3Hr1G108390	-0.581749	0.00408839
	HORVU5Hr1G074810	0.900845	0.00409944
	HORVU3Hr1G091120	0.923554	0.00410271
	HORVU4Hr1G074530	-0.691946	0.00410271
	HORVU2Hr1G026790	1.00525	0.0041395
	HORVU7Hr1G043550	0.460092	0.00416992
	HORVU4Hr1G067520	-0.702617	0.00420004
	HORVU1Hr1G047100	-0.582106	0.00420004
	HORVU2Hr1G087970	0.53302	0.00420074
	HORVU3Hr1G049060	-0.726686	0.00421529
	HORVU6Hr1G063560	-0.50143	0.00421529
	HORVU6Hr1G079640	1.2653	0.00421529
	HORVU5Hr1G005310	-0.598337	0.00422703
	HORVU5Hr1G011540	1.4388	0.00422703
	HORVU2Hr1G043900	-0.566631	0.00423671
	HORVU4Hr1G033760	0.99853	0.00423798
	HORVU1Hr1G051410	-0.874831	0.00426144
	HORVU5Hr1G016210	0.783882	0.0042775
	HORVU2Hr1G100310	-0.55349	0.00427883
	HORVU7Hr1G089470	-0.75028	0.00427883
	HORVU3Hr1G028540	0.443357	0.0042984
	HORVU1Hr1G095140	-0.705414	0.00430541
	HORVU7Hr1G044670	1.03034	0.00431508
	HORVU4Hr1G071360	0.517813	0.00431508
	HORVU5Hr1G062620	0.802697	0.00432476
	HORVU6Hr1G062140	-0.57028	0.00437141
	HORVU1Hr1G003250	1.45204	0.00438103
	HORVU1Hr1G067980	0.855887	0.00438673
	HORVU0Hr1G005420	-1.21828	0.00438673
	HORVU1Hr1G059300	-0.628985	0.00444848
	HORVU7Hr1G056310	0.784552	0.00446034
	HORVU3Hr1G000340	-0.885032	0.00446261
	HORVU2Hr1G025150	-0.535554	0.00446569
	HORVU1Hr1G088760	-0.607925	0.00446569
	HORVU2Hr1G014770	-0.453658	0.00447728
	HORVU3Hr1G083190	1.29129	0.00448703
	HORVU1Hr1G050520	0.855332	0.00448703
	HORVU2Hr1G123080	0.625907	0.00449847
	HORVU2Hr1G094200	-1.17298	0.00451706
	HORVU6Hr1G067670	-0.501758	0.00451706
	HORVU6Hr1G006840	0.679838	0.00452101
	HORVU2Hr1G096140	-1.44729	0.00453237
	HORVU6Hr1G006090	-0.935488	0.00458102
	HORVU3Hr1G078960	0.696671	0.00462334
	HORVU7Hr1G003870	0.758493	0.00462334
	HORVU1Hr1G075150	-0.453574	0.00464949
	HORVU3Hr1G068600	0.629927	0.0046676
	HORVU7Hr1G091910	1.16331	0.00466998
	HORVU5Hr1G062640	1.12566	0.00471041
	HORVU4Hr1G065080	-0.637183	0.0047375
	HORVU1Hr1G082250	0.638198	0.0047375
	HORVU4Hr1G011740	0.632847	0.00474622
	HORVU0Hr1G022260	1.22706	0.00474705
	HORVU5Hr1G061340	1.19079	0.0047702
	HORVU7Hr1G108960	0.648662	0.0047702
	HORVU4Hr1G013330	1.11843	0.00481518
	HORVU3Hr1G117890	0.705007	0.00482105
	HORVU7Hr1G085010	-1.08003	0.00485335
	HORVU4Hr1G002530	-0.456532	0.00487453
	HORVU7Hr1G100450	-0.917303	0.00489554
	HORVU4Hr1G076520	0.576321	0.00492835
	HORVU2Hr1G071850	0.879371	0.00496474
	HORVU5Hr1G092700	0.740106	0.00496474
	HORVU2Hr1G040020	-0.504889	0.00497669
	HORVU5Hr1G043700	0.820287	0.00497669
	HORVU6Hr1G033380	0.654769	0.00497669
	HORVU5Hr1G098310	-0.737137	0.00502075
	HORVU6Hr1G073990	0.466363	0.00502381
	HORVU1Hr1G045690	1.21652	0.00502837
	HORVU1Hr1G002410	-0.722435	0.00504172
	HORVU3Hr1G020240	-1.13008	0.005052
	HORVU3Hr1G019840	0.622005	0.00511855
	HORVU6Hr1G055250	0.603641	0.00512314
	HORVU4Hr1G068710	0.721549	0.00516542
	HORVU7Hr1G106530	-0.974282	0.00519001
	HORVU7Hr1G053550	1.25575	0.00519946
	HORVU7Hr1G121390	-0.505102	0.00520284
	HORVU2Hr1G100150	-0.97478	0.00521154
	HORVU1Hr1G086070	0.485302	0.00521154
	HORVU4Hr1G083100	-0.619715	0.00523299
	HORVU7Hr1G108530	-0.666802	0.00526042
	HORVU1Hr1G068740	1.02536	0.00526042
	HORVU1Hr1G087900	-0.526311	0.00526496
	HORVU5Hr1G122820	0.826495	0.00530158
	HORVU2Hr1G024150	0.651059	0.00530949
	HORVU2Hr1G039850	0.547816	0.00530949
	HORVU4Hr1G006480	-0.463572	0.00530949
	HORVU6Hr1G016320	-1.4077	0.00530949
	HORVU3Hr1G073230	-0.526292	0.00538598
	HORVU7Hr1G080630	-0.718517	0.00538598
	HORVU5Hr1G053330	0.969346	0.00539317
	HORVU1Hr1G073670	-0.819412	0.00540672
	HORVU3Hr1G027650	-0.669688	0.00541457
	HORVU7Hr1G037090	0.896285	0.00544961
	HORVU2Hr1G003110	-0.854309	0.0054506
	HORVU3Hr1G097790	-0.936156	0.0055639
	HORVU6Hr1G018520	-0.650693	0.0055639
	HORVU3Hr1G046970	-0.676171	0.00559782
	HORVU2Hr1G104170	1.41197	0.0056369
	HORVU1Hr1G004560	1.41623	0.00564637
	HORVU2Hr1G094380	0.556312	0.0056496
	HORVU5Hr1G122860	-0.604076	0.00568301
	HORVU6Hr1G022070	-1.25067	0.00569064
	HORVU3Hr1G001510	1.41628	0.00571228
	HORVU5Hr1G116590	1.37309	0.00571228
	HORVU1Hr1G054240	-0.640844	0.00571742
	HORVU1Hr1G063310	0.6401	0.00571742
	HORVU1Hr1G042370	1.12258	0.00574569
	HORVU4Hr1G037800	-0.618286	0.00574647
	HORVU3Hr1G018860	0.65795	0.00576942
	HORVU2Hr1G103520	-0.721551	0.00577063
	HORVU3Hr1G050440	0.697252	0.00579172
	HORVU2Hr1G114450	1.41307	0.00580888
	HORVU6Hr1G051760	-0.885804	0.00582358
	HORVU6Hr1G001480	-0.808521	0.00583517
	HORVU5Hr1G045850	0.674593	0.00590927
	HORVU7Hr1G081910	-0.7161	0.00590927
	HORVU5Hr1G063650	-1.16736	0.00590989
	HORVU4Hr1G011180	-0.90769	0.00590989
	HORVU4Hr1G076010	0.966609	0.00590989
	HORVU7Hr1G120030	-0.655259	0.00591045
	HORVU1Hr1G039160	-0.668453	0.00592022
	HORVU7Hr1G024350	0.66536	0.0059366
	HORVU1Hr1G023220	0.485642	0.00598038
	HORVU5Hr1G074610	1.36399	0.00598203
	HORVU6Hr1G083110	-1.37396	0.00603124
	HORVU7Hr1G027670	0.596033	0.00606377
	HORVU7Hr1G042260	1.13983	0.00606377
	HORVU7Hr1G098010	0.483869	0.00608722
	HORVU2Hr1G080100	-0.751034	0.00613602
	HORVU7Hr1G065420	0.724991	0.00613696
	HORVU3Hr1G053620	0.462064	0.00619352
	HORVU7Hr1G080070	0.688001	0.00619416
	HORVU3Hr1G031880	-1.14027	0.00619889
	HORVU7Hr1G090240	0.622981	0.00620854
	HORVU1Hr1G024190	0.600614	0.00620854
	HORVU3Hr1G015190	-0.626866	0.00625706
	HORVU2Hr1G125430	0.899223	0.00626677
	HORVU2Hr1G079040	0.895194	0.00630805
	HORVU6Hr1G005400	1.40353	0.00638816
	HORVU7Hr1G075790	-0.51963	0.00641689
	HORVU2Hr1G069440	0.786806	0.00644923
	HORVU7Hr1G090840	1.27711	0.00648074
	HORVU4Hr1G008310	-0.497548	0.00648074
	HORVU6Hr1G020960	-1.14457	0.00652719
	HORVU7Hr1G070330	-0.552234	0.00655269
	HORVU4Hr1G083970	-0.86746	0.00657469
	HORVU7Hr1G074690	0.487412	0.00658741
	HORVU2Hr1G115360	-0.558898	0.00659215
	HORVU4Hr1G067740	0.87766	0.00659215
	HORVU3Hr1G082370	1.36883	0.00660938
	HORVU2Hr1G026540	-0.91686	0.0066247
	HORVU3Hr1G057180	0.834462	0.0066247
	HORVU5Hr1G103920	-0.78316	0.0066247
	HORVU7Hr1G008420	1.05447	0.0066247
	HORVU7Hr1G117640	0.827421	0.0066247
	HORVU4Hr1G000050	1.22156	0.0066247
	HORVU0Hr1G039840	-1.33279	0.0066247
	HORVU1Hr1G083960	-0.922817	0.00663417
	HORVU3Hr1G055980	-0.722311	0.00665721
	HORVU5Hr1G105970	-0.963441	0.00665721
	HORVU5Hr1G077010	0.671056	0.00667322
	HORVU1Hr1G084970	-0.469494	0.00667709
	HORVU4Hr1G028600	-0.562119	0.0067135
	HORVU6Hr1G040040	0.817091	0.00672463
	HORVU3Hr1G065770	-0.554284	0.00672932
	HORVU3Hr1G113890	-0.944077	0.00672932
	HORVU7Hr1G013440	1.16834	0.00672932
	HORVU4Hr1G026060	-0.768048	0.00672932
	HORVU7Hr1G039640	-0.636488	0.00676589
	HORVU7Hr1G040030	0.523983	0.00682895
	HORVU3Hr1G111640	1.34665	0.00683281
	HORVU6Hr1G052600	-0.666995	0.00686078
	HORVU2Hr1G098500	0.652217	0.00690346
	HORVU5Hr1G103330	-0.66143	0.00690706
	HORVU4Hr1G051610	0.944439	0.00692087
	HORVU3Hr1G077400	-1.16259	0.00695957
	HORVU1Hr1G077230	-0.742638	0.00698529
	HORVU7Hr1G036570	1.10292	0.00698836
	HORVU2Hr1G021500	-0.756494	0.00700484
	HORVU3Hr1G012850	-0.575888	0.00700484
	HORVU3Hr1G068030	1.39407	0.00700484
	HORVU5Hr1G041530	-0.875541	0.00700484
	HORVU4Hr1G070240	-0.742178	0.00700484
	HORVU1Hr1G013970	1.16375	0.00700484
	HORVU1Hr1G076670	0.524822	0.00700484
	HORVU1Hr1G087570	-0.44852	0.00702145
	HORVU2Hr1G103100	-0.568535	0.00702162
	HORVU7Hr1G106450	0.720748	0.00703646
	HORVU1Hr1G059540	1.12322	0.0070809
	HORVU6Hr1G081930	1.06877	0.00708992
	HORVU5Hr1G008250	0.784601	0.00716827
	HORVU2Hr1G037700	-0.772299	0.00717454
	HORVU3Hr1G095450	-0.501687	0.00721653
	HORVU6Hr1G071150	1.38641	0.00721966
	HORVU7Hr1G067060	-0.605895	0.00722019
	HORVU3Hr1G060600	1.32887	0.00725606
	HORVU7Hr1G010870	1.16945	0.00725606
	HORVU7Hr1G028050	-0.626566	0.00725606
	HORVU4Hr1G019290	-0.802671	0.00725606
	HORVU3Hr1G098170	0.670349	0.0073535
	HORVU5Hr1G098980	0.639754	0.00738507
	HORVU6Hr1G059550	-0.741623	0.00739677
	HORVU7Hr1G048710	-0.662834	0.00739992
	HORVU1Hr1G026590	0.695098	0.00739992
	HORVU1Hr1G000340	1.21446	0.00741594
	HORVU2Hr1G019810	-0.642767	0.00742368
	HORVU6Hr1G016200	1.1438	0.00746406
	HORVU7Hr1G043090	-0.810254	0.00746465
	HORVU3Hr1G102030	-0.63919	0.00746857
	HORVU2Hr1G034440	0.760738	0.00749079
	HORVU2Hr1G019730	0.575883	0.00752439
	HORVU6Hr1G020720	0.580028	0.00753
	HORVU6Hr1G090070	-0.681795	0.00753
	HORVU0Hr1G026500	-0.648796	0.00757456
	HORVU0Hr1G016350	0.843255	0.00760592
	HORVU3Hr1G068780	0.774585	0.00767389
	HORVU6Hr1G059290	-0.813731	0.00767389
	HORVU7Hr1G072710	-0.836269	0.0076831
	HORVU4Hr1G000810	1.18142	0.00770711
	HORVU5Hr1G021150	-0.85881	0.00771962
	HORVU3Hr1G087470	0.703913	0.00778274
	HORVU1Hr1G060490	0.62553	0.00778588
	HORVU5Hr1G059900	-0.555204	0.00779571
	HORVU4Hr1G009040	-0.57158	0.00785838
	HORVU3Hr1G116490	0.702172	0.00786538
	HORVU3Hr1G106810	1.37623	0.00799092
	HORVU5Hr1G110180	0.75505	0.00803433
	HORVU7Hr1G054510	-0.776906	0.00804016
	HORVU6Hr1G031590	0.496675	0.00804394
	HORVU4Hr1G013640	-0.637562	0.00810009
	HORVU0Hr1G009740	-0.571811	0.00812581
	HORVU7Hr1G057470	-0.467862	0.0081412
	HORVU4Hr1G014600	1.29194	0.00818724
	HORVU3Hr1G053350	0.643419	0.00821437
	HORVU5Hr1G027240	-0.559964	0.00822889
	HORVU2Hr1G082860	-0.567805	0.00825234
	HORVU3Hr1G087570	0.939804	0.00826835
	HORVU2Hr1G093680	-0.707941	0.00831008
	HORVU7Hr1G096900	-0.766464	0.0083128
	HORVU2Hr1G029900	0.45706	0.00831655
	HORVU4Hr1G009340	0.753809	0.00839058
	HORVU0Hr1G020360	-0.660243	0.00839058
	HORVU3Hr1G010030	0.803052	0.00839281
	HORVU1Hr1G030140	-0.588533	0.00842664
	HORVU3Hr1G092270	0.728708	0.00843521
	HORVU6Hr1G055000	0.815229	0.00850931
	HORVU2Hr1G033820	-0.800174	0.00851416
	HORVU3Hr1G091920	1.35313	0.00851416
	HORVU3Hr1G060720	-0.682765	0.00852393
	HORVU5Hr1G125630	-0.565889	0.00855467
	HORVU7Hr1G098510	0.601402	0.00859146
	HORVU6Hr1G076510	0.845865	0.00859933
	HORVU7Hr1G021800	-0.683805	0.00867588
	HORVU3Hr1G097200	0.66102	0.00871857
	HORVU1Hr1G062080	0.529888	0.00872979
	HORVU5Hr1G082890	0.540817	0.00874156
	HORVU6Hr1G070290	-0.488065	0.00874156
	HORVU5Hr1G020800	1.14089	0.00877648
	HORVU5Hr1G062160	-0.910483	0.0088059
	HORVU7Hr1G085220	-0.545006	0.0089141
	HORVU3Hr1G112080	1.36091	0.00894894
	HORVU3Hr1G058100	-0.886835	0.00898642
	HORVU2Hr1G027480	0.50516	0.00900245
	HORVU7Hr1G051180	-0.752827	0.00900245
	HORVU1Hr1G059810	-0.837888	0.00900874
	HORVU7Hr1G035020	1.23945	0.00905537
	HORVU6Hr1G060080	-0.987414	0.00905537
	HORVU5Hr1G109680	-0.68991	0.0091054
	HORVU7Hr1G088140	-0.538568	0.00913841
	HORVU1Hr1G051450	0.953908	0.00916204
	HORVU3Hr1G086500	1.00167	0.00919824
	HORVU0Hr1G008860	0.653331	0.0092194
	HORVU3Hr1G106140	-0.581065	0.00926273
	HORVU5Hr1G068200	-0.844357	0.00926273
	HORVU4Hr1G077480	-1.34185	0.00926273
	HORVU6Hr1G072990	1.01598	0.00926273
	HORVU2Hr1G099490	-0.772445	0.00931819
	HORVU3Hr1G089830	0.548569	0.00932843
	HORVU3Hr1G001040	-0.525024	0.00933443
	HORVU7Hr1G011290	-0.725873	0.00935084
	HORVU7Hr1G045770	-0.577588	0.00938185
	HORVU5Hr1G020430	0.909801	0.00939305
	HORVU7Hr1G108230	0.839417	0.00946851
	HORVU4Hr1G005270	0.923147	0.00946936
	HORVU4Hr1G020050	-1.26775	0.00947065
	HORVU3Hr1G115860	0.771728	0.0095
	HORVU4Hr1G054910	-0.602561	0.00952905
	HORVU5Hr1G009100	1.24153	0.00960605
	HORVU7Hr1G114680	0.765426	0.00963878
	HORVU3Hr1G016850	0.546088	0.00964143
	HORVU5Hr1G061580	0.877314	0.00964143
	HORVU2Hr1G109660	-0.581448	0.00967729
	HORVU3Hr1G014730	-0.460037	0.00969147
	HORVU2Hr1G021900	-0.597749	0.00972646
	HORVU2Hr1G103620	0.43818	0.00973649
	HORVU5Hr1G087760	-0.58258	0.00974908
	HORVU4Hr1G050160	-0.786764	0.00981353
	HORVU3Hr1G108330	0.619078	0.00984788
	HORVU2Hr1G043970	-0.660203	0.00988099
	HORVU7Hr1G024220	-0.480768	0.00988099
	HORVU4Hr1G012070	-0.669217	0.00988099
	HORVU2Hr1G112620	0.584545	0.00992519
	HORVU3Hr1G079620	-0.496512	0.00995375
UCs (FDR>0.01)	HORVU3Hr1G054360	-0.617554	0.0100664
	HORVU5Hr1G036630	-0.635567	0.0100664
	HORVU4Hr1G008870	-0.797231	0.0100664
	HORVU3Hr1G114920	0.883119	0.0101489
	HORVU6Hr1G085870	-0.46081	0.0101489
	HORVU1Hr1G053990	-0.803877	0.0101779
	HORVU3Hr1G030970	1.33003	0.0101975
	HORVU3Hr1G066720	-0.58921	0.0101975
	HORVU4Hr1G003820	0.630343	0.0101975
	HORVU4Hr1G075180	-0.485941	0.0101975
	HORVU1Hr1G033270	-0.655817	0.0101975
	HORVU2Hr1G080590	-0.886475	0.0101999
	HORVU3Hr1G085210	0.613023	0.0102246
	HORVU7Hr1G035790	-0.745924	0.0102246
	HORVU4Hr1G051320	-0.54413	0.0102578
	HORVU4Hr1G022830	1.12476	0.0103665
	HORVU7Hr1G098110	-0.401856	0.010382
	HORVU2Hr1G059620	0.492137	0.0103891
	HORVU1Hr1G014010	-0.812378	0.0104718
	HORVU2Hr1G114220	1.11803	0.0105414
	HORVU4Hr1G043990	0.789624	0.0105514
	HORVU7Hr1G071530	1.20638	0.0105627
	HORVU1Hr1G010380	-0.644331	0.0106031
	HORVU7Hr1G091100	0.849172	0.0106097
	HORVU5Hr1G069090	0.854703	0.010612
	HORVU2Hr1G014140	-0.694599	0.0107241
	HORVU7Hr1G093260	0.708815	0.0107241
	HORVU2Hr1G014580	-0.58905	0.0107308
	HORVU2Hr1G038190	1.00462	0.0107455
	HORVU6Hr1G086560	0.533054	0.0107455
	HORVU6Hr1G093840	0.991331	0.0107455
	HORVU7Hr1G075360	-0.594563	0.0107902
	HORVU5Hr1G072930	1.05059	0.0108537
	HORVU6Hr1G086860	0.931394	0.0108537
	HORVU4Hr1G083470	-0.599486	0.0108824
	HORVU4Hr1G052110	-1.29312	0.0109071
	HORVU2Hr1G119250	0.615965	0.010911
	HORVU3Hr1G089630	-0.662529	0.010911
	HORVU4Hr1G074450	-0.717536	0.010911
	HORVU5Hr1G023070	0.643736	0.0109348
	HORVU5Hr1G100900	-0.408324	0.0109348
	HORVU5Hr1G067760	1.32521	0.0109417
	HORVU2Hr1G086900	-0.730462	0.0109822
	HORVU1Hr1G089490	1.28257	0.0110227
	HORVU1Hr1G049120	1.0242	0.0110711
	HORVU1Hr1G020690	1.13824	0.0110848
	HORVU3Hr1G084450	0.903457	0.0111307
	HORVU2Hr1G121060	0.645166	0.0111502
	HORVU2Hr1G050270	-0.448852	0.0111821
	HORVU2Hr1G093000	-1.0887	0.0112135
	HORVU3Hr1G082460	1.05975	0.0112292
	HORVU5Hr1G094690	0.983124	0.0112292
	HORVU5Hr1G053810	0.477512	0.0112318
	HORVU2Hr1G099230	-0.555878	0.0112485
	HORVU3Hr1G093080	0.667471	0.0112485
	HORVU4Hr1G084000	-0.523701	0.0112485
	HORVU1Hr1G065440	1.13187	0.0112521
	HORVU2Hr1G021350	0.707056	0.0112603
	HORVU5Hr1G050200	-0.864248	0.0112603
	HORVU4Hr1G025320	-0.902605	0.0112689
	HORVU3Hr1G094870	0.609233	0.0112694
	HORVU4Hr1G076840	0.450995	0.0112902
	HORVU3Hr1G092940	-0.846232	0.0112962
	HORVU7Hr1G008700	-0.760797	0.0112962
	HORVU7Hr1G115780	-0.728125	0.0112962
	HORVU3Hr1G079420	-1.26165	0.0113311
	HORVU3Hr1G081050	-0.959489	0.0113932
	HORVU1Hr1G064200	-0.764384	0.0113932
	HORVU3Hr1G016890	1.09361	0.0113984
	HORVU2Hr1G030810	-1.06658	0.0114558
	HORVU7Hr1G026570	1.28996	0.0114558
	HORVU2Hr1G019570	-0.760119	0.0114603
	HORVU5Hr1G011650	0.799508	0.0114603
	HORVU4Hr1G016600	-0.96052	0.0114782
	HORVU1Hr1G058520	1.26252	0.011502
	HORVU5Hr1G092790	-0.733465	0.0115367
	HORVU3Hr1G070620	0.534453	0.011555
	HORVU7Hr1G120930	0.775783	0.0115584
	HORVU1Hr1G004790	1.31371	0.0115584
	HORVU6Hr1G010400	1.04297	0.0115803
	HORVU1Hr1G059860	-0.561426	0.0116531
	HORVU2Hr1G087030	0.504396	0.0116591
	HORVU5Hr1G006320	1.22672	0.0116591
	HORVU0Hr1G009390	1.08182	0.0116591
	HORVU4Hr1G003600	0.430315	0.0116937
	HORVU5Hr1G094750	-1.07326	0.0117103
	HORVU1Hr1G054640	-0.944481	0.0117689
	HORVU2Hr1G029270	1.05196	0.0118086
	HORVU4Hr1G022950	1.09063	0.0118358
	HORVU3Hr1G019750	0.535768	0.0118407
	HORVU3Hr1G090350	0.844063	0.011875
	HORVU7Hr1G055290	0.684682	0.011954
	HORVU3Hr1G085930	0.518663	0.0120047
	HORVU2Hr1G040540	1.06884	0.0120216
	HORVU6Hr1G006080	-0.750012	0.0120852
	HORVU2Hr1G034010	-0.920629	0.0120937
	HORVU3Hr1G047040	-1.02098	0.0121059
	HORVU2Hr1G029960	-0.825139	0.0121294
	HORVU1Hr1G010810	-0.70095	0.0121919
	HORVU2Hr1G030610	0.786535	0.0122044
	HORVU1Hr1G089440	-0.733898	0.0122705
	HORVU6Hr1G073070	1.24378	0.0123188
	HORVU5Hr1G050510	-0.839594	0.0123486
	HORVU1Hr1G022250	-0.451411	0.0123561
	HORVU6Hr1G071710	0.706729	0.0123571
	HORVU1Hr1G087690	-0.473431	0.0123571
	HORVU1Hr1G021130	-0.520548	0.0123728
	HORVU2Hr1G068120	-0.636111	0.0124546
	HORVU5Hr1G092630	-0.575866	0.0125069
	HORVU5Hr1G113630	0.603884	0.0125692
	HORVU6Hr1G014420	-0.720282	0.0125702
	HORVU0Hr1G009870	-0.886395	0.0125834
	HORVU0Hr1G030920	-0.933657	0.0126113
	HORVU7Hr1G096010	-1.20781	0.012617
	HORVU6Hr1G084310	1.27097	0.0126563
	HORVU2Hr1G081950	-0.940022	0.0126637
	HORVU2Hr1G063630	0.541129	0.0128313
	HORVU2Hr1G073320	-0.656222	0.0128606
	HORVU3Hr1G115820	-0.637678	0.0128767
	HORVU2Hr1G031450	-0.535433	0.0129047
	HORVU3Hr1G077780	-0.796069	0.0129146
	HORVU7Hr1G059330	0.571962	0.0129162
	HORVU2Hr1G018190	0.727475	0.0129675
	HORVU1Hr1G019390	0.856616	0.0129686
	HORVU1Hr1G064950	0.74196	0.013035
	HORVU2Hr1G021650	1.30497	0.0130474
	HORVU6Hr1G024770	0.57741	0.0131059
	HORVU3Hr1G040710	-0.628919	0.0131322
	HORVU5Hr1G117770	-0.746352	0.0132133
	HORVU7Hr1G052960	-0.575033	0.0132133
	HORVU5Hr1G084860	0.904978	0.0132527
	HORVU2Hr1G072060	-0.655837	0.0132635
	HORVU2Hr1G121990	0.505411	0.0132635
	HORVU5Hr1G018830	0.663194	0.0132764
	HORVU4Hr1G067020	-0.431235	0.0132888
	HORVU2Hr1G126130	1.27542	0.0132968
	HORVU1Hr1G016490	0.441644	0.0133206
	HORVU5Hr1G087340	-0.793764	0.0133577
	HORVU6Hr1G076340	0.820087	0.0133577
	HORVU3Hr1G060580	1.24007	0.0133597
	HORVU5Hr1G116580	-0.438488	0.013382
	HORVU7Hr1G091250	0.868228	0.013382
	HORVU0Hr1G005300	0.772565	0.0133949
	HORVU5Hr1G006180	0.803813	0.0134541
	HORVU7Hr1G110660	-0.566832	0.0134901
	HORVU3Hr1G063670	-0.587089	0.013501
	HORVU6Hr1G092740	0.906662	0.013517
	HORVU6Hr1G029750	-0.606962	0.0135417
	HORVU3Hr1G019590	0.587377	0.0136137
	HORVU5Hr1G036920	-0.688931	0.0136579
	HORVU7Hr1G071450	-0.640123	0.0136579
	HORVU1Hr1G002240	1.14181	0.0136579
	HORVU1Hr1G005870	-0.724915	0.0136579
	HORVU2Hr1G035160	-0.727167	0.0136995
	HORVU3Hr1G098500	1.29698	0.0136995
	HORVU1Hr1G068960	1.2238	0.0136995
	HORVU4Hr1G072560	0.563001	0.0137048
	HORVU1Hr1G048950	1.02168	0.0137048
	HORVU2Hr1G005650	-0.521417	0.0137328
	HORVU2Hr1G064530	0.935251	0.0137328
	HORVU2Hr1G095130	-0.885077	0.0137328
	HORVU5Hr1G009040	0.599979	0.0137328
	HORVU5Hr1G064080	-1.03358	0.0137328
	HORVU1Hr1G010210	-0.975221	0.0137328
	HORVU1Hr1G055140	-0.515496	0.01387
	HORVU1Hr1G084630	0.8923	0.0139064
	HORVU2Hr1G109430	-0.68547	0.0139701
	HORVU7Hr1G094640	0.424053	0.0139729
	HORVU5Hr1G078410	1.04999	0.0140069
	HORVU1Hr1G062270	-0.712675	0.0140262
	HORVU4Hr1G078260	0.939067	0.0140978
	HORVU1Hr1G029770	-0.718155	0.0142387
	HORVU1Hr1G056650	0.753282	0.0142387
	HORVU7Hr1G030730	1.20893	0.014364
	HORVU5Hr1G048300	0.732373	0.014378
	HORVU1Hr1G083100	0.883409	0.014378
	HORVU1Hr1G021780	0.374949	0.0144647
	HORVU3Hr1G032420	-0.42817	0.0144815
	HORVU3Hr1G087600	0.654721	0.0144815
	HORVU5Hr1G084160	-0.797275	0.0144815
	HORVU7Hr1G099560	0.731923	0.0145545
	HORVU5Hr1G001090	0.675567	0.0145816
	HORVU7Hr1G032310	0.429942	0.0146155
	HORVU7Hr1G043010	-0.898247	0.0146304
	HORVU2Hr1G123370	-0.549437	0.0147792
	HORVU0Hr1G022690	1.11018	0.0147792
	HORVU7Hr1G057840	1.04666	0.0148007
	HORVU4Hr1G016780	1.17449	0.0148007
	HORVU4Hr1G064710	-0.408109	0.0148265
	HORVU6Hr1G082310	0.920604	0.0148277
	HORVU3Hr1G113210	0.942894	0.0149327
	HORVU4Hr1G023570	-0.651092	0.0150052
	HORVU6Hr1G058930	-0.519461	0.0150423
	HORVU5Hr1G080980	-0.740157	0.0150465
	HORVU6Hr1G035420	-0.521003	0.0150465
	HORVU3Hr1G113200	-0.781452	0.0150916
	HORVU7Hr1G052580	0.465964	0.0151532
	HORVU7Hr1G116960	0.742776	0.0151532
	HORVU4Hr1G071830	0.468414	0.0151532
	HORVU3Hr1G086840	0.991307	0.0151541
	HORVU3Hr1G026330	0.993803	0.0151706
	HORVU7Hr1G019930	-0.460092	0.0151706
	HORVU7Hr1G026720	0.481849	0.0153576
	HORVU1Hr1G038210	0.662143	0.0154294
	HORVU3Hr1G006930	0.574767	0.0154616
	HORVU7Hr1G099320	0.82928	0.0154616
	HORVU2Hr1G094230	-0.868792	0.0154795
	HORVU5Hr1G016060	1.27988	0.0154795
	HORVU7Hr1G010620	-1.17624	0.0154803
	HORVU7Hr1G039550	-0.680259	0.0154803
	HORVU6Hr1G014080	0.483172	0.0155615
	HORVU3Hr1G057860	-0.610237	0.0155777
	HORVU7Hr1G025330	-0.690856	0.015602
	HORVU7Hr1G056770	0.396406	0.0156473
	HORVU1Hr1G079070	-0.520155	0.0156478
	HORVU2Hr1G028780	0.672566	0.0157232
	HORVU5Hr1G059300	0.722689	0.0157232
	HORVU1Hr1G043380	0.896998	0.0157232
	HORVU2Hr1G003770	-0.858273	0.0157596
	HORVU1Hr1G004150	-0.698139	0.0157851
	HORVU6Hr1G010780	0.600375	0.0157966
	HORVU3Hr1G097120	-1.23612	0.0158206
	HORVU3Hr1G018190	1.11121	0.0159518
	HORVU2Hr1G077990	0.94147	0.0159648
	HORVU6Hr1G090510	0.48234	0.0159648
	HORVU2Hr1G098920	0.465787	0.0159721
	HORVU4Hr1G054370	-0.704955	0.0160295
	HORVU3Hr1G067910	-0.501678	0.0160341
	HORVU5Hr1G104570	0.529556	0.0162866
	HORVU3Hr1G063640	-0.956134	0.0163453
	HORVU3Hr1G006000	-0.472912	0.0163687
	HORVU5Hr1G097270	0.641974	0.0163687
	HORVU3Hr1G110330	1.20484	0.0164437
	HORVU3Hr1G110560	0.679334	0.0164467
	HORVU1Hr1G082330	0.747271	0.0164467
	HORVU1Hr1G073680	-0.875429	0.0164832
	HORVU6Hr1G016610	-0.608381	0.0165156
	HORVU5Hr1G060790	0.538971	0.0165411
	HORVU6Hr1G083930	0.572256	0.0165847
	HORVU7Hr1G082540	0.39404	0.0165954
	HORVU3Hr1G074480	-0.530503	0.0166524
	HORVU4Hr1G028080	0.453709	0.0166874
	HORVU1Hr1G034400	-0.547974	0.0167013
	HORVU5Hr1G076660	0.55507	0.0167301
	HORVU6Hr1G083050	0.648528	0.0167301
	HORVU4Hr1G056820	-0.45357	0.0167339
	HORVU6Hr1G029910	0.726864	0.0167389
	HORVU2Hr1G037470	-0.44907	0.0167627
	HORVU1Hr1G077350	1.25019	0.0168057
	HORVU7Hr1G038990	-0.741097	0.0168101
	HORVU2Hr1G018390	0.701665	0.0168111
	HORVU4Hr1G073730	0.88613	0.0168245
	HORVU2Hr1G037750	0.596678	0.0168683
	HORVU1Hr1G080070	-0.83825	0.0169326
	HORVU3Hr1G107170	0.511351	0.0169355
	HORVU1Hr1G061090	0.645758	0.0169355
	HORVU6Hr1G006100	-0.626295	0.0169499
	HORVU2Hr1G068790	1.25952	0.0169801
	HORVU4Hr1G003120	-0.683882	0.0169801
	HORVU7Hr1G038200	-0.9654	0.0170745
	HORVU1Hr1G021720	-0.586034	0.0171134
	HORVU3Hr1G037170	0.662379	0.017139
	HORVU5Hr1G072520	0.506276	0.0173599
	HORVU2Hr1G007510	1.24985	0.0174179
	HORVU7Hr1G027440	0.869096	0.0174179
	HORVU2Hr1G105090	-0.657602	0.0174488
	HORVU3Hr1G027160	0.608745	0.0175638
	HORVU5Hr1G061870	-0.69435	0.0175638
	HORVU7Hr1G044150	0.58848	0.0175638
	HORVU6Hr1G007360	-1.0137	0.0175638
	HORVU2Hr1G040500	0.82365	0.0175811
	HORVU6Hr1G020380	1.01292	0.0175811
	HORVU1Hr1G055930	0.498742	0.0175811
	HORVU1Hr1G053440	-0.624617	0.0176275
	HORVU3Hr1G076220	-0.65053	0.0176548
	HORVU1Hr1G069510	-0.787638	0.0176548
	HORVU2Hr1G003540	1.05471	0.0177992
	HORVU4Hr1G007020	0.587279	0.0178696
	HORVU1Hr1G081240	0.553596	0.0179416
	HORVU2Hr1G116090	0.668552	0.0179527
	HORVU7Hr1G066970	0.674345	0.0180138
	HORVU7Hr1G087050	-0.561603	0.0180788
	HORVU1Hr1G057560	-1.1537	0.0180788
	HORVU7Hr1G087210	-0.536445	0.0181086
	HORVU2Hr1G079840	-0.488238	0.0181252
	HORVU1Hr1G092240	1.24505	0.0181413
	HORVU6Hr1G077790	-0.794063	0.0181624
	HORVU6Hr1G058610	0.668992	0.0182601
	HORVU1Hr1G070270	0.494614	0.0182601
	HORVU5Hr1G061160	0.827178	0.0182715
	HORVU2Hr1G012860	-0.463768	0.0184776
	HORVU7Hr1G074030	0.835827	0.0184778
	HORVU3Hr1G098360	0.558123	0.0184921
	HORVU5Hr1G084690	-1.18814	0.0185168
	HORVU3Hr1G028050	1.19182	0.0185229
	HORVU3Hr1G081400	0.445717	0.0185229
	HORVU5Hr1G096060	-0.564661	0.0185229
	HORVU2Hr1G101370	0.818352	0.0185388
	HORVU3Hr1G059250	-1.23502	0.0185388
	HORVU4Hr1G071390	-0.655769	0.0186279
	HORVU6Hr1G039440	-0.600305	0.0187887
	HORVU3Hr1G007250	0.683329	0.0189357
	HORVU2Hr1G026340	0.4381	0.0189484
	HORVU5Hr1G095120	1.24874	0.0190181
	HORVU3Hr1G096050	0.417628	0.0190326
	HORVU3Hr1G094550	-0.509815	0.0191029
	HORVU6Hr1G009570	1.05614	0.0191253
	HORVU4Hr1G002390	1.2466	0.0191667
	HORVU1Hr1G059960	-0.519358	0.0191864
	HORVU3Hr1G064680	0.684298	0.0192152
	HORVU5Hr1G119260	-0.590655	0.0193307
	HORVU4Hr1G029410	0.506445	0.0193403
	HORVU6Hr1G084070	-1.03074	0.0193963
	HORVU1Hr1G003590	-0.745943	0.0193982
	HORVU1Hr1G073050	-0.876324	0.0194448
	HORVU5Hr1G021690	0.767684	0.0195718
	HORVU6Hr1G063650	-0.732809	0.0196189
	HORVU6Hr1G016750	-0.439657	0.0197622
	HORVU4Hr1G010650	0.395908	0.0198269
	HORVU6Hr1G078990	-0.994232	0.0198495
	HORVU4Hr1G055880	-0.693013	0.0199376
	HORVU6Hr1G064610	-0.700773	0.0199376
	HORVU2Hr1G073370	1.05231	0.0199535
	HORVU1Hr1G008130	-0.564612	0.0200034
	HORVU2Hr1G028580	0.782477	0.0200562
	HORVU7Hr1G047700	-0.566179	0.0201144
	HORVU3Hr1G000760	0.567979	0.0201749
	HORVU2Hr1G113460	0.448738	0.0202947
	HORVU1Hr1G091990	-0.912845	0.0204318
	HORVU3Hr1G086510	-0.659093	0.020433
	HORVU5Hr1G100200	-0.425239	0.0204349
	HORVU6Hr1G062800	0.614127	0.0204349
	HORVU1Hr1G021140	0.479843	0.0205253
	HORVU5Hr1G053580	-0.971718	0.020588
	HORVU5Hr1G063770	-0.451866	0.020588
	HORVU5Hr1G075200	0.416789	0.020588
	HORVU1Hr1G093760	1.09866	0.020588
	HORVU3Hr1G037560	0.993907	0.0205967
	HORVU1Hr1G060920	-0.790595	0.0206823
	HORVU5Hr1G100980	-1.16738	0.0207391
	HORVU7Hr1G040250	-0.783426	0.0207811
	HORVU2Hr1G002130	-0.888919	0.0208148
	HORVU2Hr1G034840	-0.694302	0.0208366
	HORVU5Hr1G005290	-0.730629	0.0208532
	HORVU2Hr1G094080	-0.802747	0.0208609
	HORVU6Hr1G069110	-0.776614	0.0208609
	HORVU1Hr1G054040	-0.550517	0.0209526
	HORVU4Hr1G055510	0.940222	0.0209574
	HORVU1Hr1G020050	-0.81166	0.0210781
	HORVU4Hr1G087760	0.400952	0.0210821
	HORVU5Hr1G067360	0.634637	0.0211023
	HORVU4Hr1G003090	-0.534216	0.0212386
	HORVU1Hr1G081770	-0.794403	0.0212846
	HORVU2Hr1G017490	-1.17714	0.0213457
	HORVU2Hr1G122280	1.16042	0.0213457
	HORVU7Hr1G000150	-0.641856	0.0213457
	HORVU6Hr1G075110	-0.926284	0.0213682
	HORVU1Hr1G057170	0.855334	0.0213931
	HORVU1Hr1G046350	1.19488	0.0213946
	HORVU5Hr1G022060	-0.488271	0.0213958
	HORVU4Hr1G050630	-0.463848	0.0213977
	HORVU4Hr1G056100	-0.73972	0.0214419
	HORVU3Hr1G116050	1.20046	0.0214695
	HORVU7Hr1G050160	-0.625081	0.0214695
	HORVU0Hr1G022580	-0.710668	0.0214695
	HORVU2Hr1G109120	-0.384791	0.0214855
	HORVU5Hr1G077790	0.814437	0.0214855
	HORVU7Hr1G106960	0.792175	0.0214855
	HORVU4Hr1G074270	-0.599701	0.0214855
	HORVU1Hr1G019410	0.814499	0.0214855
	HORVU0Hr1G033220	0.631384	0.0216928
	HORVU1Hr1G068910	0.778968	0.0217801
	HORVU3Hr1G022020	-0.547194	0.0218455
	HORVU7Hr1G091800	0.583927	0.0218636
	HORVU2Hr1G088550	-0.674387	0.0220114
	HORVU5Hr1G071140	0.537804	0.0220371
	HORVU4Hr1G020230	0.565472	0.0220736
	HORVU3Hr1G026920	0.574548	0.0220738
	HORVU4Hr1G081150	0.494207	0.0221456
	HORVU7Hr1G100100	-0.497956	0.0221507
	HORVU2Hr1G123150	-0.935253	0.0221712
	HORVU7Hr1G083490	0.483267	0.0222662
	HORVU5Hr1G116320	-0.819689	0.0223226
	HORVU3Hr1G001530	-0.695424	0.0223956
	HORVU6Hr1G094400	-0.695385	0.0224255
	HORVU6Hr1G067430	0.502741	0.0224755
	HORVU1Hr1G048450	-1.11074	0.02252
	HORVU5Hr1G002970	0.449785	0.0225218
	HORVU5Hr1G122170	-0.578169	0.0225315
	HORVU2Hr1G122610	0.532047	0.022541
	HORVU7Hr1G054690	-0.467693	0.0225553
	HORVU2Hr1G014710	-0.549467	0.0225752
	HORVU3Hr1G073100	0.714718	0.0225752
	HORVU3Hr1G080130	-0.527878	0.0225752
	HORVU4Hr1G077240	-0.611847	0.0225752
	HORVU1Hr1G063380	0.656795	0.0226328
	HORVU4Hr1G013370	-0.715525	0.0226532
	HORVU4Hr1G072210	-0.603111	0.022659
	HORVU7Hr1G100810	1.18445	0.0226854
	HORVU7Hr1G042000	0.438663	0.022738
	HORVU1Hr1G063320	0.420098	0.022738
	HORVU4Hr1G019940	-0.544584	0.0227395
	HORVU2Hr1G065000	1.21989	0.0227954
	HORVU2Hr1G020260	0.972455	0.023027
	HORVU2Hr1G011060	1.10044	0.0230443
	HORVU1Hr1G065810	-0.402542	0.0230684
	HORVU4Hr1G005780	-0.469787	0.0230685
	HORVU6Hr1G041750	-0.601915	0.023203
	HORVU3Hr1G074960	0.594898	0.0232424
	HORVU0Hr1G027900	-1.01331	0.023323
	HORVU3Hr1G076080	0.468141	0.023331
	HORVU3Hr1G087250	-0.666327	0.023331
	HORVU1Hr1G047390	0.469725	0.0234041
	HORVU3Hr1G066930	-0.49677	0.0234256
	HORVU7Hr1G094730	-0.490446	0.0234256
	HORVU0Hr1G019690	-1.0198	0.0234256
	HORVU2Hr1G016040	-0.669435	0.0234273
	HORVU3Hr1G066740	-0.473026	0.0234273
	HORVU2Hr1G078890	0.707334	0.0234309
	HORVU3Hr1G059710	-0.772175	0.023504
	HORVU2Hr1G042350	-0.709721	0.023533
	HORVU2Hr1G016440	0.875742	0.0237594
	HORVU2Hr1G027680	-0.503216	0.0238756
	HORVU1Hr1G021070	-0.97787	0.0238756
	HORVU1Hr1G022400	-0.633751	0.0238756
	HORVU5Hr1G077450	1.00614	0.0239076
	HORVU1Hr1G058440	-0.686974	0.0239076
	HORVU3Hr1G107320	0.52261	0.0240127
	HORVU1Hr1G051580	1.15654	0.0240127
	HORVU3Hr1G090080	-0.502639	0.0240403
	HORVU2Hr1G077510	0.834941	0.0241073
	HORVU7Hr1G007800	1.12459	0.0241085
	HORVU2Hr1G023260	0.548094	0.0241779
	HORVU7Hr1G093120	0.66143	0.0241864
	HORVU1Hr1G071210	-0.616719	0.0242476
	HORVU1Hr1G085550	-0.824461	0.0242476
	HORVU4Hr1G089090	1.01437	0.0242819
	HORVU7Hr1G113400	0.765635	0.0243314
	HORVU0Hr1G017160	-0.763099	0.0244658
	HORVU0Hr1G000990	0.686856	0.0246161
	HORVU7Hr1G106790	-0.898846	0.024624
	HORVU0Hr1G024390	0.872617	0.0246341
	HORVU6Hr1G073730	0.420508	0.0246405
	ENSRNA049460237	-0.854471	0.0246485
	HORVU4Hr1G050520	0.735501	0.0246928
	HORVU0Hr1G037770	0.914427	0.024706
	HORVU3Hr1G073780	-0.4647	0.0248233
	HORVU6Hr1G035820	-0.581404	0.0249175
	HORVU6Hr1G088440	-0.54281	0.0249567
	HORVU5Hr1G072870	0.877358	0.0250156
	HORVU1Hr1G092630	1.01593	0.0250156
	HORVU2Hr1G091400	1.17583	0.0250652
	HORVU2Hr1G027600	-0.563955	0.0251203
	HORVU7Hr1G011310	-0.636122	0.0251237
	HORVU3Hr1G074820	-0.803335	0.0252304
	HORVU2Hr1G087090	0.915495	0.0252578
	HORVU2Hr1G085690	-0.504437	0.0253831
	HORVU4Hr1G078150	0.606971	0.0253943
	HORVU5Hr1G124650	0.479518	0.0254264
	HORVU3Hr1G051910	0.624083	0.0254293
	HORVU5Hr1G041210	-1.1539	0.0254301
	HORVU4Hr1G023530	-0.501858	0.0254647
	HORVU6Hr1G022380	0.450012	0.0256043
	HORVU5Hr1G037440	0.879903	0.0256082
	HORVU3Hr1G069970	0.393639	0.0257599
	HORVU6Hr1G057680	-0.469227	0.0259126
	HORVU1Hr1G080520	0.802321	0.0259126
	HORVU7Hr1G020800	1.10757	0.0259176
	HORVU1Hr1G075040	0.605596	0.0259513
	HORVU4Hr1G008580	0.563242	0.0259636
	HORVU7Hr1G007000	-0.530681	0.0262074
	HORVU3Hr1G107450	1.19815	0.0262751
	HORVU2Hr1G109170	-0.926092	0.0263088
	HORVU5Hr1G013240	-0.516049	0.026377
	HORVU5Hr1G001310	-0.593519	0.0263941
	HORVU2Hr1G111480	-0.616651	0.0264888
	HORVU1Hr1G053650	1.12969	0.0264888
	HORVU6Hr1G018600	-0.912799	0.0265036
	HORVU1Hr1G033390	-0.538275	0.0265221
	HORVU2Hr1G081800	0.599734	0.0265851
	HORVU1Hr1G055520	0.478412	0.0266336
	HORVU3Hr1G004510	-0.532259	0.0266569
	HORVU4Hr1G087840	0.8515	0.026698
	HORVU5Hr1G047540	0.93451	0.0267218
	HORVU4Hr1G064020	-0.600273	0.02683
	HORVU1Hr1G023060	-0.581515	0.02683
	HORVU5Hr1G012510	0.777636	0.0268356
	HORVU4Hr1G056770	-0.532438	0.0269407
	HORVU7Hr1G077790	0.712933	0.0269745
	HORVU3Hr1G030350	0.459326	0.0270138
	HORVU4Hr1G060450	0.562036	0.0271514
	HORVU7Hr1G023560	1.00639	0.0272866
	HORVU6Hr1G036810	-0.603592	0.0273904
	HORVU1Hr1G017480	0.531658	0.0273904
	HORVU1Hr1G042920	0.450178	0.027393
	HORVU2Hr1G088900	-0.973112	0.0275348
	HORVU0Hr1G013740	0.62289	0.0277215
	HORVU3Hr1G057920	-0.895375	0.0277723
	HORVU5Hr1G010440	-0.863194	0.0277723
	HORVU7Hr1G033170	0.685088	0.0278029
	HORVU3Hr1G112480	-1.04283	0.0279795
	HORVU5Hr1G058160	-0.913834	0.0279795
	HORVU7Hr1G011180	0.885232	0.0280574
	HORVU0Hr1G040360	-1.06316	0.0280574
	HORVU2Hr1G018440	1.18289	0.0280914
	HORVU1Hr1G000440	1.02771	0.0281784
	HORVU7Hr1G001190	-0.647935	0.0282006
	HORVU7Hr1G095680	-0.432947	0.0282006
	HORVU5Hr1G000510	1.18021	0.0283099
	HORVU7Hr1G058730	0.394672	0.0283259
	HORVU2Hr1G081750	0.548998	0.0283425
	HORVU4Hr1G061190	0.431944	0.028381
	HORVU1Hr1G021150	0.543047	0.0284977
	HORVU2Hr1G106550	-1.10658	0.0285198
	HORVU7Hr1G027770	-0.873301	0.0285986
	HORVU7Hr1G115670	-0.458681	0.0285986
	HORVU7Hr1G118010	0.837169	0.0285986
	HORVU6Hr1G014620	-0.867945	0.0287457
	HORVU7Hr1G121200	-0.935766	0.0288388
	HORVU2Hr1G105930	1.11935	0.0288932
	HORVU3Hr1G034240	-0.576088	0.0289398
	HORVU5Hr1G105930	0.577126	0.0289488
	HORVU6Hr1G070590	-1.05547	0.0289488
	HORVU6Hr1G069560	-0.528905	0.0290095
	HORVU2Hr1G017450	-0.459442	0.0290756
	HORVU3Hr1G078110	0.618458	0.0291092
	HORVU4Hr1G006500	-0.438605	0.0291092
	HORVU2Hr1G092230	0.519911	0.0291914
	HORVU2Hr1G013200	0.472353	0.029229
	HORVU5Hr1G048000	0.551839	0.0292666
	HORVU1Hr1G047710	0.684287	0.0292666
	HORVU6Hr1G005240	-0.706579	0.0294138
[truncated: 14,943 more rows]

## Sheet: Root H2O2+LaCl3 unique
	Gene-ID	Log2FC	FDR
DEGs (FDR<0.01)	HORVU5Hr1G118420	4.21802	5.05774e-11
	HORVU6Hr1G071920	4.14041	1.0959e-12
	HORVU2Hr1G017420	3.88785	4.80716e-49
	HORVU7Hr1G053930	3.80812	1.82716e-09
	HORVU3Hr1G018740	3.80629	1.13506e-11
	HORVU7Hr1G054530	3.77141	1.91025e-09
	HORVU4Hr1G050120	3.72943	5.27081e-08
	HORVU2Hr1G102100	3.70146	1.97903e-14
	HORVU6Hr1G091840	3.66943	5.06474e-14
	HORVU6Hr1G056570	3.64015	6.54552e-13
	HORVU6Hr1G087220	3.59729	1.16875e-12
	HORVU3Hr1G117390	3.44898	4.0085e-08
	HORVU7Hr1G029460	3.44294	5.74808e-07
	HORVU1Hr1G083210	3.42164	4.51934e-08
	HORVU3Hr1G093270	3.39609	1.1109e-25
	HORVU2Hr1G099470	3.32206	1.88294e-07
	HORVU7Hr1G098370	3.31888	3.62718e-34
	HORVU1Hr1G069830	3.31264	3.03086e-10
	HORVU3Hr1G093350	3.28941	4.86149e-15
	HORVU2Hr1G026820	3.27369	1.30618e-16
	HORVU2Hr1G005170	3.23756	1.56235e-12
	HORVU5Hr1G122950	3.22968	2.21441e-06
	HORVU7Hr1G091080	3.22957	4.89653e-06
	HORVU1Hr1G089730	3.22832	3.07676e-06
	HORVU3Hr1G080500	3.22398	1.38568e-08
	HORVU5Hr1G021610	3.22368	6.91341e-07
	HORVU1Hr1G092250	3.2193	1.03225e-06
	HORVU1Hr1G088620	3.19627	7.60042e-07
	HORVU3Hr1G117650	3.19559	3.65731e-09
	HORVU3Hr1G003860	3.19252	1.88003e-08
	HORVU2Hr1G102110	3.19006	8.7162e-08
	HORVU5Hr1G001180	3.1856	1.51804e-08
	HORVU4Hr1G087800	3.09912	2.45794e-05
	HORVU1Hr1G092290	3.07762	2.23674e-05
	HORVU3Hr1G074940	3.07265	8.33826e-06
	HORVU6Hr1G067920	3.02726	3.10837e-06
	HORVU2Hr1G107480	3.02095	1.05208e-06
	HORVU5Hr1G110220	3.01579	4.12451e-07
	HORVU5Hr1G117830	3.00406	2.05023e-08
	HORVU1Hr1G079450	3.00174	1.45534e-05
	HORVU2Hr1G078570	2.99942	1.1836e-10
	HORVU5Hr1G069880	2.97069	1.3958e-05
	HORVU1Hr1G049100	2.95313	1.49528e-09
	HORVU3Hr1G078380	2.93391	6.96774e-05
	HORVU4Hr1G018100	2.91993	7.44986e-08
	HORVU1Hr1G020800	2.8782	7.46698e-05
	HORVU1Hr1G093760	2.86798	2.47778e-09
	HORVU4Hr1G067430	2.86172	4.41338e-07
	HORVU7Hr1G026570	2.85186	7.98356e-06
	HORVU2Hr1G104080	2.84264	1.38015e-11
	HORVU3Hr1G059030	2.84025	2.13907e-05
	HORVU4Hr1G014590	2.80286	1.13549e-06
	HORVU3Hr1G006450	2.79155	3.29265e-09
	HORVU5Hr1G027980	2.78346	2.91137e-12
	HORVU5Hr1G119550	2.7674	1.60055e-11
	HORVU3Hr1G095700	2.75597	1.12087e-18
	HORVU2Hr1G098140	2.73538	0.000178747
	HORVU2Hr1G021920	2.73473	3.64022e-05
	HORVU4Hr1G015170	2.7277	2.75636e-07
	HORVU3Hr1G030950	2.72103	0.000325331
	HORVU5Hr1G063620	2.7193	1.87792e-09
	HORVU3Hr1G088190	2.71722	6.95422e-22
	HORVU7Hr1G083530	2.70681	1.53184e-05
	HORVU4Hr1G012700	2.67399	0.000465481
	HORVU6Hr1G009000	2.66577	6.39064e-05
	HORVU6Hr1G095380	2.65806	0.000291075
	HORVU1Hr1G079290	2.65599	1.76606e-05
	HORVU4Hr1G060760	2.65554	1.8746e-06
	HORVU6Hr1G016480	2.64408	0.000464377
	HORVU3Hr1G091800	2.63776	0.000574766
	HORVU6Hr1G075840	2.61957	0.000147661
	HORVU2Hr1G011490	2.60374	0.000356657
	HORVU4Hr1G059260	2.59102	3.30622e-05
	HORVU1Hr1G002160	2.58305	2.70853e-05
	HORVU1Hr1G071180	2.58158	0.000369053
	HORVU5Hr1G018720	2.5798	3.8539e-05
	HORVU2Hr1G034610	2.57441	4.15748e-05
	HORVU1Hr1G092630	2.57284	5.24133e-06
	HORVU5Hr1G065740	2.56939	0.000749581
	HORVU7Hr1G013170	2.5647	0.000791097
	HORVU6Hr1G021060	2.5585	6.97863e-05
	HORVU1Hr1G080300	2.55847	0.000533142
	HORVU5Hr1G021070	2.54531	0.000608291
	HORVU5Hr1G034340	2.54352	8.57753e-05
	HORVU6Hr1G074060	2.53833	1.64123e-05
	HORVU5Hr1G094490	2.53733	3.72209e-05
	HORVU4Hr1G082040	2.53677	0.000454079
	HORVU6Hr1G008640	2.53592	5.60039e-09
	HORVU3Hr1G084210	2.52161	0.000349177
	HORVU3Hr1G084360	2.51403	0.000945788
	HORVU7Hr1G088510	2.50452	3.10952e-09
	HORVU1Hr1G005280	2.49899	0.000953168
	HORVU2Hr1G110230	2.49601	1.69386e-05
	HORVU3Hr1G020490	2.47887	1.0555e-11
	HORVU3Hr1G020140	2.46303	0.000162879
	HORVU7Hr1G044160	2.46059	0.00128163
	HORVU0Hr1G018970	2.45956	0.000396039
	HORVU4Hr1G087780	2.45768	1.77769e-06
	HORVU7Hr1G034070	2.45163	0.000209236
	HORVU0Hr1G009390	2.44772	3.74264e-06
	HORVU4Hr1G044140	2.44425	0.000538566
	HORVU4Hr1G076200	2.4429	0.000206555
	HORVU1Hr1G090890	2.42962	8.86995e-07
	HORVU2Hr1G118010	2.41728	0.00213489
	HORVU1Hr1G009250	2.41322	0.000253979
	HORVU3Hr1G078490	2.4085	0.00212533
	HORVU1Hr1G056570	2.40674	0.000565716
	HORVU1Hr1G002170	2.40049	0.000195139
	HORVU3Hr1G004050	2.39588	0.000687139
	HORVU5Hr1G125560	2.39506	0.000307354
	HORVU2Hr1G118080	2.39216	1.53816e-08
	HORVU1Hr1G085260	2.37613	0.00138827
	HORVU1Hr1G015810	2.36155	7.90665e-05
	HORVU1Hr1G010940	2.3589	0.000854202
	HORVU3Hr1G070690	2.34943	4.14968e-09
	HORVU3Hr1G004140	2.34236	0.000328268
	HORVU3Hr1G020520	2.34051	1.68796e-14
	HORVU6Hr1G068980	2.33962	5.42719e-08
	HORVU1Hr1G022660	2.33768	0.00118755
	HORVU2Hr1G007570	2.33462	7.00081e-09
	HORVU6Hr1G085850	2.32481	0.00322953
	HORVU7Hr1G120450	2.32442	0.00301652
	HORVU5Hr1G096240	2.32186	0.00306888
	HORVU2Hr1G077710	2.32006	0.000232452
	HORVU3Hr1G097770	2.32001	1.20498e-05
	HORVU5Hr1G095630	2.31315	0.000579279
	HORVU0Hr1G000840	2.30291	0.00203699
	HORVU5Hr1G104800	2.30198	3.15636e-15
	HORVU2Hr1G020310	2.29821	0.000347615
	HORVU7Hr1G003490	2.29818	1.31211e-06
	HORVU3Hr1G024660	2.2977	0.00270935
	HORVU7Hr1G083440	2.29235	0.00386095
	HORVU4Hr1G019570	2.29194	1.71255e-06
	HORVU1Hr1G065600	2.2899	4.76032e-14
	HORVU5Hr1G106250	2.28986	0.00413569
	HORVU6Hr1G036800	2.27512	0.00411698
	HORVU2Hr1G115890	2.25981	0.00398352
	HORVU7Hr1G077270	2.25901	0.0042533
	HORVU3Hr1G016900	2.25581	0.00268567
	HORVU4Hr1G070950	2.25265	0.000327498
	HORVU7Hr1G108830	2.24767	0.00214286
	HORVU0Hr1G022350	2.24628	0.00398352
	HORVU2Hr1G113070	2.24125	0.000846643
	HORVU6Hr1G034730	2.23758	8.95622e-11
	HORVU0Hr1G022290	2.23689	0.00536712
	HORVU3Hr1G068140	2.23276	0.00547097
	HORVU6Hr1G000940	2.22397	1.31805e-05
	HORVU2Hr1G022080	2.22274	0.000856957
	HORVU7Hr1G020580	2.22077	0.00582349
	HORVU7Hr1G084240	2.21526	0.00582962
	HORVU6Hr1G088400	2.21297	0.00577992
	HORVU5Hr1G066130	2.20607	0.00431417
	HORVU3Hr1G091790	2.20475	0.00605987
	HORVU2Hr1G022160	2.20467	0.00621697
	HORVU6Hr1G059930	2.2034	0.00615054
	HORVU4Hr1G056070	2.1979	7.39983e-08
	HORVU6Hr1G081350	2.19689	0.000384
	HORVU2Hr1G122470	2.19656	1.29915e-05
	HORVU3Hr1G112520	2.19252	0.000124383
	HORVU5Hr1G007260	2.18495	0.00465528
	HORVU3Hr1G091360	2.1807	1.65228e-09
	HORVU4Hr1G002600	2.17818	0.00223933
	HORVU2Hr1G105740	2.17656	0.00663903
	HORVU4Hr1G087840	2.17152	3.32215e-07
	HORVU7Hr1G093210	2.17144	0.00597059
	HORVU7Hr1G019400	2.16975	0.00560963
	HORVU2Hr1G057700	2.16911	7.98255e-12
	HORVU3Hr1G097010	2.16683	0.0062178
	HORVU7Hr1G119200	2.16627	0.00263268
	HORVU1Hr1G066830	2.16583	0.00754609
	HORVU4Hr1G043650	2.16301	4.15748e-05
	HORVU4Hr1G007190	2.15552	2.80593e-05
	HORVU0Hr1G002480	2.15211	0.00771828
	HORVU3Hr1G032440	2.14948	0.00153799
	HORVU6Hr1G081570	2.14684	1.4897e-06
	HORVU7Hr1G101310	2.13986	0.00329557
	HORVU6Hr1G084310	2.13451	0.00214737
	HORVU5Hr1G124450	2.134	0.000111642
	HORVU6Hr1G032400	2.13392	0.00413569
	HORVU0Hr1G013900	2.13122	0.00416323
	HORVU6Hr1G020540	2.13076	0.00735084
	HORVU7Hr1G049580	2.12782	0.000865394
	HORVU7Hr1G009680	2.12181	7.45275e-05
	HORVU2Hr1G117940	2.12156	8.57166e-11
	HORVU3Hr1G109590	2.12146	0.00897893
	HORVU4Hr1G008550	2.11965	1.29439e-05
	HORVU7Hr1G107310	2.11782	3.47888e-07
	HORVU0Hr1G024200	2.11684	0.00590483
	HORVU3Hr1G110440	2.11264	0.00501778
	HORVU4Hr1G016190	2.1092	6.50127e-08
	HORVU5Hr1G047150	2.10849	3.79418e-10
	HORVU4Hr1G027900	2.10267	0.000166115
	HORVU7Hr1G008830	2.10258	0.00369127
	HORVU2Hr1G040680	2.09514	0.00051991
	HORVU7Hr1G090560	2.08999	0.00156086
	HORVU1Hr1G056340	2.08598	0.00215632
	HORVU3Hr1G082460	2.07992	3.56345e-06
	HORVU4Hr1G090130	2.07906	0.00394527
	HORVU3Hr1G024210	2.07301	4.10538e-18
	HORVU2Hr1G108580	2.06821	0.00617928
	HORVU1Hr1G027700	2.06711	0.000245587
	HORVU2Hr1G124320	2.06641	0.00964109
	HORVU3Hr1G108950	2.06561	0.000173116
	HORVU6Hr1G000720	2.06247	5.50682e-08
	HORVU4Hr1G090020	2.05977	0.00600449
	HORVU4Hr1G063350	2.05329	5.6212e-06
	HORVU3Hr1G117570	2.04131	7.71604e-05
	HORVU5Hr1G051970	2.04011	0.00369666
	HORVU7Hr1G035400	2.03487	9.09249e-05
	HORVU2Hr1G108290	2.03015	0.00073095
	HORVU7Hr1G097270	2.02826	0.00765851
	HORVU3Hr1G026890	2.02457	0.000620309
	HORVU2Hr1G118100	2.02269	1.9863e-07
	HORVU1Hr1G000440	2.02131	0.00396823
	HORVU2Hr1G007070	2.02106	0.000125304
	HORVU4Hr1G088860	2.01516	1.02441e-07
	HORVU2Hr1G017240	2.00823	0.00718514
	HORVU1Hr1G035650	2.00752	0.00897893
	HORVU7Hr1G019390	2.00692	0.00748224
	HORVU3Hr1G043250	2.00667	0.00321859
	HORVU5Hr1G056100	2.00451	0.00697885
	HORVU5Hr1G105840	2.00162	0.00947234
	HORVU2Hr1G044450	2.00126	0.00566318
	HORVU7Hr1G071530	1.99538	0.00110401
	HORVU4Hr1G010940	1.99343	0.00544171
	HORVU2Hr1G105930	1.99278	0.00025113
	HORVU0Hr1G000050	1.99044	0.00762787
	HORVU1Hr1G094710	1.99019	0.0011203
	HORVU7Hr1G084140	1.98725	0.00115865
	HORVU7Hr1G008820	1.98201	0.00667198
	HORVU3Hr1G034980	1.98094	0.00525089
	HORVU3Hr1G069730	1.97706	4.27105e-05
	HORVU2Hr1G102050	1.9754	1.30201e-09
	HORVU7Hr1G015740	1.9702	1.26376e-07
	HORVU0Hr1G019300	1.96851	0.000730933
	HORVU5Hr1G069090	1.967	2.3997e-08
	HORVU4Hr1G015670	1.95981	1.39286e-11
	HORVU7Hr1G040480	1.95975	0.000502141
	HORVU3Hr1G089380	1.95773	0.00597059
	HORVU7Hr1G072670	1.95494	1.19643e-08
	HORVU5Hr1G063660	1.952	0.000611352
	HORVU0Hr1G016130	1.95191	0.000425797
	HORVU3Hr1G011710	1.94793	0.0037112
	HORVU4Hr1G016010	1.94604	0.00811886
	HORVU7Hr1G107400	1.94546	1.67734e-05
	HORVU1Hr1G021160	1.94024	0.000246802
	HORVU3Hr1G037780	1.93655	4.67911e-09
	HORVU5Hr1G005180	1.93093	0.00416915
	HORVU3Hr1G113210	1.92913	0.000269534
	HORVU5Hr1G103430	1.92801	1.27137e-06
	HORVU5Hr1G081610	1.92358	0.00100714
	HORVU7Hr1G054710	1.91519	8.40174e-05
	HORVU6Hr1G075900	1.90515	1.82319e-05
	HORVU4Hr1G022270	1.90324	0.000542007
	HORVU6Hr1G001160	1.90098	3.0326e-07
	HORVU5Hr1G106010	1.90044	0.00424465
	HORVU2Hr1G087090	1.89675	0.00169868
	HORVU3Hr1G113620	1.89193	6.03345e-07
	HORVU1Hr1G057680	1.89097	7.90665e-05
	HORVU7Hr1G106960	1.87932	2.80593e-05
	HORVU3Hr1G092520	1.87823	0.0077102
	HORVU5Hr1G079910	1.87736	0.00563508
	HORVU6Hr1G077120	1.87416	0.00149161
	HORVU0Hr1G009420	1.8738	0.00818387
	HORVU7Hr1G115810	1.8735	0.00819931
	HORVU6Hr1G076530	1.8726	0.00207863
	HORVU5Hr1G092100	1.87241	0.00814885
	HORVU7Hr1G007800	1.87218	0.000607135
	HORVU1Hr1G019380	1.87117	0.00424465
	HORVU3Hr1G074100	1.87054	0.00335404
	HORVU7Hr1G036130	1.8682	0.00205905
	HORVU7Hr1G098220	1.86569	4.62676e-05
	HORVU5Hr1G112060	1.85067	8.69476e-07
	HORVU2Hr1G106190	1.85058	8.64452e-05
	HORVU1Hr1G048950	1.84861	5.27081e-08
	HORVU4Hr1G083070	1.84828	1.02441e-07
	HORVU2Hr1G085270	1.84764	0.00164268
	HORVU3Hr1G026920	1.84567	3.75474e-08
	HORVU4Hr1G085590	1.84488	2.52009e-10
	HORVU2Hr1G065120	1.84295	1.78141e-05
	HORVU3Hr1G016890	1.83767	0.00152345
	HORVU3Hr1G018680	1.83347	0.00045296
	HORVU6Hr1G084070	1.83195	0.00206556
	HORVU6Hr1G075270	1.83104	0.00796444
	HORVU6Hr1G031700	1.82663	0.00556057
	HORVU6Hr1G085170	1.80798	1.55884e-08
	HORVU1Hr1G049840	1.80686	0.00633539
	HORVU5Hr1G008180	1.80498	0.000238287
	HORVU3Hr1G077890	1.80357	5.16075e-05
	HORVU2Hr1G092100	1.80339	9.70949e-05
	HORVU6Hr1G058290	1.79632	7.58775e-06
	HORVU7Hr1G014870	1.79257	2.16539e-06
	HORVU2Hr1G045480	1.79048	0.000223383
	HORVU7Hr1G088670	1.78788	7.6334e-07
	HORVU3Hr1G104940	1.78235	0.00217617
	HORVU3Hr1G060730	1.78077	0.00495142
	HORVU0Hr1G038320	1.77997	0.0097631
	HORVU4Hr1G008980	1.77905	0.00743069
	HORVU1Hr1G018350	1.7775	1.37481e-08
	HORVU4Hr1G000620	1.77692	0.00454757
	HORVU4Hr1G022280	1.77473	0.000278551
	HORVU3Hr1G007590	1.77153	0.00491701
	HORVU3Hr1G085270	1.76965	0.00619518
	HORVU6Hr1G000960	1.76696	0.000109567
	HORVU2Hr1G091400	1.76165	0.00217359
	HORVU5Hr1G050990	1.74691	1.03295e-10
	HORVU3Hr1G080440	1.74484	4.74466e-07
	HORVU5Hr1G020900	1.73882	0.000187754
	HORVU3Hr1G001060	1.73663	7.44682e-05
	HORVU2Hr1G085280	1.73613	0.00401273
	HORVU1Hr1G083920	1.73116	0.00287473
	HORVU6Hr1G019870	1.72772	0.00252413
	HORVU7Hr1G091250	1.7266	2.62033e-06
	HORVU2Hr1G017270	1.72539	0.000171775
	HORVU6Hr1G020380	1.72494	0.00114954
	HORVU7Hr1G106420	1.72432	0.00556378
	HORVU7Hr1G049240	1.71992	3.97723e-05
	HORVU0Hr1G009470	1.7091	0.000323545
	HORVU5Hr1G082420	1.70909	2.3949e-09
	HORVU4Hr1G082700	1.70835	0.00207514
	HORVU5Hr1G072650	1.70744	3.0775e-07
	HORVU5Hr1G012790	1.70655	0.000860659
	HORVU7Hr1G043690	1.70324	0.0071081
	HORVU5Hr1G111280	1.70161	0.0020646
	HORVU3Hr1G117580	1.70092	2.8687e-11
	HORVU4Hr1G090850	1.70047	0.00234289
	HORVU0Hr1G001430	1.69676	0.00975517
	HORVU3Hr1G111600	1.69484	9.29068e-08
	HORVU2Hr1G113060	1.69345	0.00134407
	HORVU4Hr1G053250	1.69265	0.000195139
	HORVU2Hr1G015980	1.69224	1.78577e-05
	HORVU2Hr1G041610	1.69159	0.00166355
	HORVU1Hr1G088300	1.69153	0.00804093
	HORVU6Hr1G063480	1.69057	1.83358e-11
	HORVU1Hr1G081210	1.68813	0.00741618
	HORVU3Hr1G017610	1.67192	0.00312126
	HORVU2Hr1G029270	1.67146	4.32364e-06
	HORVU3Hr1G109160	1.66983	0.000617145
	HORVU5Hr1G000520	1.66824	0.0035083
	HORVU7Hr1G117880	1.66668	0.00928694
	HORVU2Hr1G014150	1.66567	0.000339443
	HORVU5Hr1G087980	1.66426	0.00737336
	HORVU7Hr1G113290	1.66017	0.00210106
	HORVU7Hr1G086010	1.65847	0.00379462
	HORVU1Hr1G066530	1.65794	1.31211e-06
	HORVU4Hr1G089520	1.65757	0.00913951
	HORVU1Hr1G065670	1.65471	0.0082284
	HORVU2Hr1G068090	1.65068	5.73708e-06
	HORVU5Hr1G110000	1.63742	0.000131345
	HORVU3Hr1G114920	1.63362	0.00241006
	HORVU6Hr1G060440	1.63328	0.0021705
	HORVU6Hr1G088960	1.63298	4.6504e-11
	HORVU1Hr1G037270	1.63208	2.04227e-08
	HORVU1Hr1G063420	1.62648	0.00164268
	HORVU5Hr1G112610	1.62382	0.00143967
	HORVU7Hr1G007540	1.62292	0.00404521
	HORVU1Hr1G046630	1.62236	0.00231698
	HORVU7Hr1G042120	1.61806	0.00497425
	HORVU2Hr1G107760	1.61443	0.000526905
	HORVU5Hr1G074300	1.61137	0.00633645
	HORVU2Hr1G005330	1.60435	0.00506279
	HORVU2Hr1G119110	1.60362	0.000872454
	HORVU3Hr1G035680	1.60097	0.000565716
	HORVU1Hr1G054560	1.59132	0.00896894
	HORVU3Hr1G019720	1.59119	0.00324523
	HORVU1Hr1G040720	1.58349	0.00129215
	HORVU7Hr1G029750	1.57484	0.000131691
	HORVU1Hr1G028920	1.57397	0.0040649
	HORVU3Hr1G099770	1.57364	0.00125672
	HORVU6Hr1G018050	1.57063	2.36402e-05
	HORVU7Hr1G027810	1.56824	0.00229284
	HORVU1Hr1G063390	1.56701	1.07865e-05
	HORVU5Hr1G040310	1.56522	0.00405087
	HORVU0Hr1G003850	1.56172	0.00143356
	HORVU6Hr1G089540	1.55805	3.13384e-08
	HORVU1Hr1G079280	1.55559	0.00407983
	HORVU5Hr1G051010	1.55342	1.81366e-07
	HORVU7Hr1G116060	1.55287	0.00288825
	HORVU6Hr1G062350	1.54568	0.00896081
	HORVU1Hr1G076800	1.54429	1.21034e-07
	HORVU6Hr1G000830	1.54017	6.21286e-05
	HORVU3Hr1G013270	1.53874	0.005373
	HORVU3Hr1G067760	1.5371	0.00184155
	HORVU2Hr1G083700	1.53503	0.00821409
	HORVU2Hr1G065330	1.53292	3.74842e-05
	HORVU2Hr1G019820	1.5313	7.70335e-07
	HORVU2Hr1G082480	1.52555	0.00545427
	HORVU5Hr1G104680	1.52512	0.00183399
	HORVU3Hr1G052880	1.51894	1.63788e-06
	HORVU4Hr1G077850	1.51092	8.24603e-05
	HORVU2Hr1G040780	1.50418	3.88637e-05
	HORVU7Hr1G078670	1.50102	1.81366e-07
	HORVU4Hr1G062440	1.50084	0.00593253
	HORVU3Hr1G058150	1.49996	0.00172897
	HORVU1Hr1G089830	1.49966	0.00179607
	HORVU7Hr1G002110	1.4985	9.36026e-06
	HORVU3Hr1G085720	1.4978	0.00435497
	HORVU6Hr1G089600	1.49431	0.000390206
	HORVU5Hr1G052770	1.48928	0.00156891
	HORVU5Hr1G052820	1.48897	0.00961219
	HORVU4Hr1G060720	1.48865	7.82715e-05
	HORVU6Hr1G064770	1.48725	5.56057e-05
	HORVU5Hr1G109710	1.48507	0.00146462
	HORVU6Hr1G015770	1.48481	0.00824354
	HORVU0Hr1G010810	1.48475	0.00582349
	HORVU5Hr1G122060	1.48137	7.00456e-06
	HORVU5Hr1G050120	1.47785	0.00220166
	HORVU5Hr1G111290	1.47458	3.8729e-05
	HORVU7Hr1G036540	1.47374	0.00590483
	HORVU5Hr1G094590	1.47227	0.000817859
	HORVU2Hr1G105690	1.47117	0.00330034
	HORVU5Hr1G044640	1.46306	0.000852971
	HORVU6Hr1G057080	1.46019	0.00525359
	HORVU5Hr1G042740	1.4597	4.10215e-05
	HORVU3Hr1G090350	1.4532	1.41763e-05
	HORVU7Hr1G042160	1.45303	0.0014439
	HORVU6Hr1G088580	1.45071	5.1596e-05
	HORVU4Hr1G000950	1.45006	6.74408e-05
	HORVU3Hr1G038700	1.44925	0.00227766
	HORVU4Hr1G084930	1.44406	0.0004016
	HORVU0Hr1G001490	1.44367	0.00551626
	HORVU7Hr1G028240	1.43605	0.00645146
	HORVU3Hr1G082030	1.42748	8.40174e-05
	HORVU6Hr1G081140	1.42613	1.94874e-05
	HORVU3Hr1G072260	1.42094	0.00250365
	HORVU5Hr1G100140	1.41963	0.0011154
	HORVU3Hr1G059720	1.4187	0.00164594
	HORVU3Hr1G085460	1.41416	0.00114312
	HORVU4Hr1G026160	1.41296	0.000121943
	HORVU7Hr1G082710	1.41278	0.00597059
	HORVU5Hr1G123120	1.40729	0.00344264
	HORVU5Hr1G059310	1.40625	0.00876082
	HORVU3Hr1G020800	1.40554	0.0040649
	HORVU0Hr1G015890	1.40196	0.000565596
	HORVU6Hr1G078820	1.40095	1.35977e-05
	HORVU4Hr1G046610	1.39604	0.00160861
	HORVU4Hr1G053940	1.3946	0.00159568
	HORVU7Hr1G000900	1.39291	0.00113254
	HORVU2Hr1G073370	1.39241	0.00044623
	HORVU2Hr1G108480	1.38851	0.00656811
	HORVU3Hr1G105420	1.38585	0.00822497
	HORVU7Hr1G050240	1.38459	0.000725537
	HORVU5Hr1G073680	1.3834	0.00463689
	HORVU1Hr1G069800	1.37814	9.78303e-05
	HORVU5Hr1G066260	1.3779	7.79672e-10
	HORVU2Hr1G063460	1.37462	0.00216904
	HORVU6Hr1G031080	1.37391	0.00914116
	HORVU4Hr1G073730	1.37278	0.000598239
	HORVU7Hr1G100230	1.37248	0.000427612
	HORVU2Hr1G019270	1.37075	6.35953e-06
	HORVU0Hr1G005160	1.36989	0.00804093
	HORVU1Hr1G028900	1.36896	0.00449208
	HORVU2Hr1G063480	1.36279	0.00339718
	HORVU7Hr1G040860	1.36046	0.000819336
	HORVU7Hr1G107210	1.35752	0.00581629
	HORVU3Hr1G071120	1.35628	0.00264909
	HORVU7Hr1G033170	1.35561	0.000573973
	HORVU1Hr1G065440	1.35229	0.00265059
	HORVU1Hr1G049420	1.34985	0.00839897
	HORVU3Hr1G013810	1.34135	0.00527735
	HORVU2Hr1G018190	1.34082	8.37634e-07
	HORVU0Hr1G008950	1.33681	2.10424e-05
	HORVU6Hr1G038700	1.33506	0.0051204
	HORVU3Hr1G016990	1.33342	0.00274356
	HORVU3Hr1G091480	1.33299	7.48843e-07
	HORVU5Hr1G098220	1.33248	0.0072544
	HORVU4Hr1G022830	1.33182	0.00997786
	HORVU5Hr1G120570	1.33004	0.00567043
	HORVU4Hr1G000850	1.32216	0.001324
	HORVU4Hr1G085090	1.3198	0.00713513
	HORVU3Hr1G071320	1.31213	0.00235734
	HORVU2Hr1G006690	1.31074	0.000110808
	HORVU1Hr1G062480	1.30971	1.10548e-06
	HORVU2Hr1G079920	1.30956	0.00638685
	HORVU7Hr1G099320	1.30577	0.00456571
	HORVU6Hr1G060720	1.30452	0.00416621
	HORVU5Hr1G045990	1.30152	0.00339905
	HORVU3Hr1G112010	1.29734	0.00174244
	HORVU2Hr1G103180	1.29098	2.06749e-09
	HORVU2Hr1G078790	1.28949	0.000116174
	HORVU3Hr1G047220	1.28835	1.38823e-06
	HORVU5Hr1G077790	1.28302	0.00575048
	HORVU4Hr1G011910	1.27065	0.00114954
	HORVU5Hr1G097150	1.26721	2.90667e-06
	HORVU2Hr1G005320	1.2659	0.000483343
	HORVU2Hr1G075230	1.26439	0.00621666
	HORVU4Hr1G068960	1.26389	5.71411e-05
	HORVU1Hr1G082100	1.26212	6.69235e-05
	HORVU6Hr1G090000	1.25386	5.02299e-05
	HORVU4Hr1G057170	1.2503	6.37188e-08
	HORVU3Hr1G013840	1.24806	0.000117476
	HORVU6Hr1G005360	1.24781	0.00823849
	HORVU4Hr1G054210	1.24564	1.37157e-05
	HORVU1Hr1G075520	1.24485	0.00309293
	HORVU1Hr1G051020	1.24299	0.00677733
	HORVU2Hr1G116090	1.2408	0.00035209
	HORVU5Hr1G113900	1.23215	0.00295416
	HORVU5Hr1G043600	1.23093	0.000369735
	HORVU3Hr1G015740	1.23029	3.49802e-05
	HORVU5Hr1G084860	1.22245	0.00588577
	HORVU1Hr1G085480	1.21571	0.0092443
	HORVU2Hr1G104030	1.21332	0.00761182
	HORVU5Hr1G006280	1.20972	0.00608829
	HORVU4Hr1G088340	1.208	0.000848074
	HORVU5Hr1G018830	1.20553	1.50803e-06
	HORVU5Hr1G011650	1.20069	0.0059566
	HORVU2Hr1G084910	1.19773	0.00614599
	HORVU2Hr1G036960	1.19388	0.00472844
	HORVU5Hr1G093460	1.19052	0.00739833
	HORVU2Hr1G078840	1.1889	1.76616e-07
	HORVU4Hr1G024290	1.18428	0.00349182
	HORVU3Hr1G081860	1.18002	0.00292091
	HORVU3Hr1G061930	1.17989	1.85468e-07
	HORVU3Hr1G015540	1.17617	0.000324438
	HORVU6Hr1G057170	1.17253	0.00764657
	HORVU5Hr1G088570	1.17055	0.00842407
	HORVU5Hr1G111850	1.16761	0.00737413
	HORVU5Hr1G088130	1.16111	0.00239002
	HORVU4Hr1G015260	1.16049	0.0050841
	HORVU3Hr1G068120	1.15775	0.00473733
	HORVU7Hr1G087700	1.15609	0.000467818
	HORVU5Hr1G030460	1.15556	0.00734267
	HORVU2Hr1G016440	1.15092	0.00122549
	HORVU2Hr1G025980	1.14383	2.87018e-05
	HORVU2Hr1G030130	1.14237	0.00338905
	HORVU5Hr1G069110	1.14	0.00534237
	HORVU5Hr1G048300	1.13813	0.00131624
	HORVU2Hr1G064170	1.13126	0.00213489
	HORVU3Hr1G089290	1.12599	0.00232256
	HORVU0Hr1G000780	1.12356	0.00641794
	HORVU4Hr1G085970	1.11421	0.00325025
	HORVU0Hr1G016430	1.10548	1.43413e-09
	HORVU3Hr1G023780	1.09587	0.00112311
	HORVU4Hr1G078950	1.09257	0.00141988
	HORVU6Hr1G053250	1.09162	9.42924e-05
	HORVU7Hr1G093120	1.08594	0.000126513
	HORVU2Hr1G044510	1.08109	0.00178112
	HORVU2Hr1G079220	1.08066	0.00278403
	HORVU3Hr1G093980	1.08055	0.0076708
	HORVU7Hr1G036470	1.07874	0.00980464
	HORVU4Hr1G082140	1.07854	0.0012822
	HORVU2Hr1G083680	1.07739	0.00652112
	HORVU3Hr1G004360	1.07421	0.000695532
	HORVU5Hr1G074030	1.07288	0.00304349
	HORVU0Hr1G022270	1.06955	0.00334013
	HORVU5Hr1G088140	1.06851	4.62676e-05
	HORVU1Hr1G064950	1.06493	0.0053057
	HORVU6Hr1G031640	1.06483	0.00125571
	HORVU5Hr1G081820	1.06377	0.00282268
	HORVU2Hr1G030610	1.0603	0.00600335
	HORVU7Hr1G091520	1.05484	0.00717636
	HORVU7Hr1G030160	1.05279	0.00351302
	HORVU2Hr1G081460	1.05022	0.005227
	HORVU5Hr1G041030	1.04979	0.0050841
	HORVU5Hr1G112440	1.04423	0.00325437
	HORVU5Hr1G107290	1.03864	0.00233966
	HORVU7Hr1G027480	1.03648	0.00278403
	HORVU2Hr1G081370	1.03612	0.00854152
	HORVU1Hr1G073170	1.03533	0.000504095
	HORVU3Hr1G110560	1.03514	0.00527735
	HORVU1Hr1G086910	1.03189	0.00821409
	HORVU5Hr1G081090	1.02849	0.000262992
	HORVU3Hr1G028810	1.02246	0.00240915
	HORVU6Hr1G028820	1.02128	0.00443307
	HORVU6Hr1G029540	1.01547	0.000326784
	HORVU1Hr1G008810	1.00807	0.000119054
	HORVU3Hr1G010620	1.0073	0.00100693
	HORVU7Hr1G046830	1.00203	0.00181643
	HORVU3Hr1G058810	-1.00091	0.00163997
	HORVU5Hr1G097940	-1.00202	8.39565e-08
	HORVU7Hr1G098540	-1.00261	0.000538313
	HORVU2Hr1G093670	-1.00558	7.9028e-06
	HORVU4Hr1G075410	-1.00658	6.94839e-09
	HORVU2Hr1G087010	-1.01107	8.10848e-06
	HORVU4Hr1G008870	-1.01566	0.00627602
	HORVU4Hr1G003040	-1.018	0.00777358
	HORVU6Hr1G076130	-1.01897	0.00101825
[truncated: 15,020 more rows]
